# Supplementary material for: Leveraging Genome and Phenome-Wide Association Studies to Investigate Genetic Risk of Acute Lymphoblastic Leukemia
Source: Oxford University Press journal article supplement (doi:10.1158/1055-9965.epi-20-0113), 2020-05-28
Supplement: 10559965epi200113-sup-236026_2_supp_6225447_q8qf96.xlsx [file 10559965epi200113-sup-236026_2_supp_6225447_q8qf96.xlsx]

## Sheet: S1 Table
Supplementary Table 1. eQTL and in silico functional analyses of SNP-sets
GWAS hit/control SNP	Chr:BP	rsID (GRCh37/hg19)	Ref	Alt	EUR freg	Promoter histone marks	Enhancer histone marks	DNAse	Proteins bound	Motifs changed	eQTL hits	GENCODE genes	dbSNP funcational annotation
acute lymphoblastic leukemia	10:22567090	rs10741006	G	C	0.59	N	N	Y	0	3	0	PIP4K2A	intronic
acute lymphoblastic leukemia	7:50398606	rs11978267	A	G	0.31	Y	Y	N	0	2	10	IKZF1	intronic
acute lymphoblastic leukemia	10:22118727	rs12769953	T	C	0.22	N	N	N	0	3	0	99kb 5' of RP11-108B14.5	intergenic
acute lymphoblastic leukemia	14:23119848	rs2239633	G	A	0.48	Y	Y	Y	0	2	5	231bp 5' of CEBPE	intergenic
acute lymphoblastic leukemia	17:39909987	rs2290400	T	C	0.52	N	N	N	0	1	24	GSDMB	intronic
acute lymphoblastic leukemia	7:21445779	rs2390536	G	A	0.37	N	N	N	0	2	0	SP4	intronic
acute lymphoblastic leukemia	9:21970917	rs3731249	C	T	0.03	Y	Y	Y	1	1	0	CDKN2A	missense
acute lymphoblastic leukemia	10:124605598	rs3740540	G	A	0.3	Y	Y	Y	0	2	0	LHPP	intronic
acute lymphoblastic leukemia	10:8062245	rs3824662	C	A	0.18	Y	Y	Y	2	4	1	GATA3	intronic
acute lymphoblastic leukemia	8:129143897	rs4617118	A	G	0.15	N	Y	N	0	2	0	73kb 3' of RP11-1057N3.1	intergenic
acute lymphoblastic leukemia	12:96218984	rs4762284	A	T	0.3	Y	Y	Y	0	3	0	ELK3	intronic
acute lymphoblastic leukemia	10:61992400	rs7089424	T	G	0.32	Y	Y	Y	4	3	0	ARID5B	intronic
chronic lymphocytic leukemia	5:1279675	rs10069690	C	T	0.27	N	N	N	0	2	0	TERT	intronic
chronic lymphocytic leukemia	3:169774313	rs10936599	C	T	0.25	N	N	Y	0	3	2	MYNN	synonymous
chronic lymphocytic leukemia	2:230226508	rs13397985	T	G	0.18	Y	Y	Y	7	4	4	AC009950.1	intronic
chronic lymphocytic leukemia	2:110858527	rs13401811	G	A	0.18	Y	Y	Y	6	3	0	ACOXL	intronic
chronic lymphocytic leukemia	9:22206988	rs1679013	C	T	0.47	Y	Y	Y	3	2	0	RP11-408N14.1	intergenic
chronic lymphocytic leukemia	7:124822607	rs17246404	C	T	0.25	N	N	N	0	4	0	POT1	3'-UTR
chronic lymphocytic leukemia	2:111039881	rs17483466	A	G	0.2	N	Y	Y	0	3	0	ACOXL	intronic
chronic lymphocytic leukemia	6:33572432	rs210134	A	G	0.71	N	Y	N	0	0	4	119bp 3' of BAK1	intergenic
chronic lymphocytic leukemia	6:154157305	rs2236256	C	A	0.58	Y	Y	Y	1	2	0	OPRM1	3'-UTR
chronic lymphocytic leukemia	8:127175774	rs2466024	G	A	0.37	N	Y	Y	1	3	0	9.9kb 3' of RP11-255B23.4	intergenic
chronic lymphocytic leukemia	8:102566646	rs2511714	T	G	0.41	Y	Y	Y	0	1	0	5.6kb 3' of ODF1	intergenic
chronic lymphocytic leukemia	16:85942053	rs305061	C	T	0.65	N	Y	N	1	2	1	19kb 3' of IRF8	intergenic
chronic lymphocytic leukemia	2:201246657	rs3769825	A	G	0.53	Y	Y	N	0	0	5	CASP8	intronic
chronic lymphocytic leukemia	16:85910833	rs391525	A	G	0.36	N	Y	Y	1	2	2	IRF8	intronic
chronic lymphocytic leukemia	10:88999967	rs4406737	A	G	0.57	Y	Y	Y	1	4	10	FAS	intronic
chronic lymphocytic leukemia	18:63126688	rs4987852	T	C	0.07	N	Y	Y	0	8	0	BCL2	3'-UTR
chronic lymphocytic leukemia	15:56048698	rs7169431	A	G	0.92	N	Y	N	0	2	2	19kb 5' of Metazoa_SRP	intergenic
chronic lymphocytic leukemia	15:69726651	rs7176508	A	G	0.61	Y	Y	N	0	6	1	4.1kb 3' of AC009677.1	intergenic
chronic lymphocytic leukemia	18:59961694	rs7231647	G	A	0.61	Y	Y	N	0	7	1	11kb 5' of Metazoa_SRP	intergenic
chronic lymphocytic leukemia	11:123490689	rs735665	G	A	0.17	N	Y	Y	2	4	1	30kb 3' of AP000783.2	intergenic
chronic lymphocytic leukemia	6:2969044	rs73718779	C	T	0.11	Y	Y	N	1	2	0	SERPINB6	intronic
chronic lymphocytic leukemia	2:241431686	rs757978	C	T	0.1	N	N	N	0	4	17	FARP2	missense
chronic lymphocytic leukemia	11:2289922	rs7944004	T	G	0.5	Y	Y	Y	0	4	3	5.7kb 3' of C11orf21	intergenic
chronic lymphocytic leukemia	15:40111456	rs8024033	C	G	0.5	N	Y	N	0	2	0	2.6kb 5' of BMF	intergenic
chronic lymphocytic leukemia	6:411064	rs872071	A	G	0.47	N	Y	N	3	3	2	IRF4	3'-UTR
chronic lymphocytic leukemia	4:108095668	rs898518	C	A	0.58	N	Y	Y	2	1	0	LEF1	intronic
chronic lymphocytic leukemia	6:32643864	rs9273012	A	G	0.22	N	Y	N	2	1	0	HLA-DQA1	intergenic
chronic lymphocytic leukemia	6:32658495	rs9273363	C	A	0.27	N	Y	Y	1	4	9	971bp 3' of HLA-DQB1	intergenic
chronic lymphocytic leukemia	2:111150685	rs9308731	G	A	0.55	N	Y	N	0	3	0	BCL2L11	intronic
chronic lymphocytic leukemia	3:188397894	rs9815073	C	A	0.34	Y	Y	N	0	0	0	LPP	intronic
chronic lymphocytic leukemia	3:27736288	rs9880772	G	A	0.46	N	N	N	0	3	0	14kb 5' of EOMES	intergenic
SNPsnap variant	4:35915695	rs10452132	T	C	0.6	N	N	N	0	2	0	33kb 3' of RP11-399D2.1	intergenic
SNPsnap variant	2:26289865	rs1056632	T	G	0.2	N	N	Y	0	1	1	HADHB	intronic
SNPsnap variant	11:96843287	rs11218607	A	C	0.43	N	N	N	0	2	0	129kb 3' of RP11-360K13.1	intergenic
SNPsnap variant	1:117907477	rs114317036	G	T	0.01	N	N	N	0	1	0	GDAP2	intronic
SNPsnap variant	5:116109217	rs114785917	G	A	0.02	N	N	N	0	3	0	COMMD10	intronic
SNPsnap variant	18:342537	rs12150850	C	T	0.31	N	Y	N	0	1	0	COLEC12	intronic
SNPsnap variant	10:28743505	rs1249007	G	A	0.51	N	Y	Y	0	7	0	239bp 5' of RP11-478H13.1	intergenic
SNPsnap variant	7:94519680	rs12704723	T	A	0.47	N	N	N	0	7	0	CASD1	intronic
SNPsnap variant	15:24078024	rs12902085	T	C	0.18	N	N	N	1	6	0	75kb 3' of RP11-484P15.2	intergenic
SNPsnap variant	13:113023581	rs1320521	G	A	0.31	Y	Y	Y	0	1	0	MCF2L	intronic
SNPsnap variant	18:72758176	rs13381144	G	A	0.3	N	N	N	0	3	0	NETO1	intronic
SNPsnap variant	2:241292547	rs143657807	G	A	0.02	N	Y	N	0	9	0	HDLBP	intronic
SNPsnap variant	5:111643889	rs1457716	T	G	0.31	N	Y	N	0	5	0	CTC-426B10.1	intronic
SNPsnap variant	17:14787937	rs16950400	G	A	0.2	N	N	N	0	0	0	7.7kb 5' of AC005863.1	intergenic
SNPsnap variant	6:163385267	rs1737328	T	A	0.29	N	Y	Y	0	4	0	29kb 5' of QKI	intergenic
SNPsnap variant	14:77719085	rs176961	T	C	0.49	N	N	N	0	2	0	SLIRP	intronic
SNPsnap variant	11:29961120	rs186351296	A	C	0.02	N	Y	N	0	6	0	19kb 3' of RP11-215H22.1	intergenic
SNPsnap variant	2:234019044	rs2052029	C	G	0.68	N	N	N	0	0	0	TRPM8	intergenic
SNPsnap variant	18:31516956	rs2155948	G	T	0.35	N	Y	N	0	1	0	DSG2	intronic
SNPsnap variant	22:19134985	rs2240110	C	T	0.48	N	Y	N	1	2	0	DGCR14	intronic
SNPsnap variant	6:74750785	rs2248180	T	C	0.35	Y	Y	Y	0	3	0	17kb 5' of RP11-554D15.3	intergenic
SNPsnap variant	2:38193531	rs232588	T	C	0.56	Y	Y	Y	0	2	0	9.8kb 3' of AC009229.5	intergenic
SNPsnap variant	4:79060830	rs2604834	C	T	0.84	N	N	N	0	4	0	RP11-438E5.1	intronic
SNPsnap variant	13:62574103	rs2809623	G	A	0.37	N	N	N	0	6	0	98kb 3' of LINC00448	intergenic
SNPsnap variant	2:126209012	rs28415293	G	A	0.15	N	Y	N	0	2	0	91kb 5' of AC114813.1	intergenic
SNPsnap variant	15:33041741	rs343898	C	G	0.4	N	Y	N	0	0	0	FMN1	intronic
SNPsnap variant	15:64930171	rs35774404	A	T	0.36	Y	Y	N	0	2	0	ANKDD1A	intronic
SNPsnap variant	11:11475706	rs3741409	G	T	0.71	N	Y	N	0	0	0	GALNTL4	intronic
SNPsnap variant	10:80260264	rs3851056	T	C	0.49	N	Y	N	0	3	0	6.6kb 3' of AL359195.1	intergenic
SNPsnap variant	21:35896620	rs403433	A	G	0.66	N	Y	N	0	0	0	RUNX1	intergenic
SNPsnap variant	9:132510188	rs548522	A	G	0.35	N	Y	Y	0	7	1	C9orf171	intronic
SNPsnap variant	5:44174121	rs55909827	C	T	0.16	N	N	N	0	1	0	107kb 5' of U6	intergenic
SNPsnap variant	6:139365766	rs59350849	T	A	0.18	N	Y	N	0	10	0	6.5kb 3' of CITED2	intergenic
SNPsnap variant	20:37632859	rs6090985	A	G	0.81	N	Y	N	0	4	0	9.7kb 5' of LINC00489	intergenic
SNPsnap variant	5:108792301	rs62361345	T	A	0.22	Y	Y	Y	2	4	0	FER	intronic
SNPsnap variant	8:16828208	rs626222	T	G	0.68	N	N	N	0	2	0	RP11-13N12.1	intergenic
SNPsnap variant	1:115313723	rs6537860	A	G	0.72	N	Y	N	0	3	0	RP4-663N10.1	intronic
SNPsnap variant	3:190425481	rs6801698	G	A	0.7	N	N	N	1	0	0	3.2kb 3' of TMEM207	intergenic
SNPsnap variant	6:62844448	rs6900586	C	T	0.32	N	N	N	0	0	0	118kb 5' of AL121931.1	intergenic
SNPsnap variant	7:54890916	rs6946428	C	T	0.29	N	N	N	0	4	0	25kb 3' of SNORA73	intergenic
SNPsnap variant	9:103189698	rs7047105	A	G	0.73	N	Y	N	0	3	0	RP11-341A22.2	intergenic
SNPsnap variant	12:97041663	rs7135293	A	C	0.62	N	N	N	0	1	0	RP11-397H6.1	intergenic
SNPsnap variant	20:1491778	rs715218	G	A	0.51	Y	Y	Y	0	3	0	190bp 5' of SIRPB2	intergenic
SNPsnap variant	3:55177986	rs716384	T	C	0.49	N	Y	Y	0	0	0	185bp 5' of RP11-889D3.2	intergenic
SNPsnap variant	16:19459444	rs7198723	C	T	0.8	Y	Y	Y	0	1	0	TMC5	intronic
SNPsnap variant	13:36048358	rs7994697	A	G	0.31	N	N	N	0	5	0	DCLK1	intronic
SNPsnap variant	7:3182961	rs870227	C	T	0.21	N	Y	Y	0	1	0	8.3kb 5' of AC091801.1	intergenic
SNPsnap variant	6:118664339	rs9401081	C	A	0.21	Y	Y	N	0	4	0	CEP85L	intronic

## Sheet: S2 Table
Supplementary Table 2. ALL risk variant associations with 778 UK Biobank GeneATLAS phenotypes
Variant	Position	Eff. Allele	Trait	Beta	p-value	MAF	HWE	imp. score
rs10741006	22856019	C	A00-A09 Intestinal infectious diseases	-0.00057198	0.064242	0.412258	0.3051	0.987636
rs11978267	50466304	A	A00-A09 Intestinal infectious diseases	5.1127e-05	0.88007	0.2752	0.9387	genotyped
rs12769953	22407656	C	A00-A09 Intestinal infectious diseases	0.00013987	0.69966	0.225586	0.2288	0.992394
rs2239633	23589057	G	A00-A09 Intestinal infectious diseases	0.00030882	0.30793	0.4838	0.09197	genotyped
rs2290400	38066240	C	A00-A09 Intestinal infectious diseases	9.0266e-05	0.76573	0.4891	0.1986	genotyped
rs2390536	21485397	A	A00-A09 Intestinal infectious diseases	8.0781e-05	0.79762	0.363622	0.315	0.993467
rs3731249	21970916	C	A00-A09 Intestinal infectious diseases	-0.00011863	0.89896	0.02696	0.473	genotyped
rs3740540	126294167	G	A00-A09 Intestinal infectious diseases	-0.00059481	0.081386	0.2686	0.6892	genotyped
rs3824662	8104208	A	A00-A09 Intestinal infectious diseases	0.00026089	0.51738	0.171996	0.2615	0.988987
rs4617118	130156143	G	A00-A09 Intestinal infectious diseases	-0.00070307	0.078522	0.174868	0.6895	0.989614
rs4762284	96612762	T	A00-A09 Intestinal infectious diseases	-0.00018602	0.57491	0.295513	0.7244	0.997309
rs7089424	63752159	T	A00-A09 Intestinal infectious diseases	-0.00048858	0.12597	0.3416	0.0849	genotyped
rs10741006	22856019	C	A04 Other bacterial intestinal infections	-7.4136e-05	0.66154	0.412258	0.3051	0.987636
rs11978267	50466304	A	A04 Other bacterial intestinal infections	4.4234e-05	0.81175	0.2752	0.9387	genotyped
rs12769953	22407656	C	A04 Other bacterial intestinal infections	0.00025381	0.20133	0.225586	0.2288	0.992394
rs2239633	23589057	G	A04 Other bacterial intestinal infections	8.3339e-05	0.61557	0.4838	0.09197	genotyped
rs2290400	38066240	C	A04 Other bacterial intestinal infections	-0.00013203	0.42649	0.4891	0.1986	genotyped
rs2390536	21485397	A	A04 Other bacterial intestinal infections	-5.1947e-05	0.76351	0.363622	0.315	0.993467
rs3731249	21970916	C	A04 Other bacterial intestinal infections	-0.00068227	0.18265	0.02696	0.473	genotyped
rs3740540	126294167	G	A04 Other bacterial intestinal infections	-0.00024487	0.19037	0.2686	0.6892	genotyped
rs3824662	8104208	A	A04 Other bacterial intestinal infections	4.8337e-05	0.8267	0.171996	0.2615	0.988987
rs4617118	130156143	G	A04 Other bacterial intestinal infections	-0.00032541	0.13728	0.174868	0.6895	0.989614
rs4762284	96612762	T	A04 Other bacterial intestinal infections	-0.00013542	0.45627	0.295513	0.7244	0.997309
rs7089424	63752159	T	A04 Other bacterial intestinal infections	-0.00016944	0.33274	0.3416	0.0849	genotyped
rs10741006	22856019	C	A08 Viral and other specified intestinal infections	-5.3947e-05	0.57474	0.412258	0.3051	0.987636
rs11978267	50466304	A	A08 Viral and other specified intestinal infections	-6.141e-06	0.95357	0.2752	0.9387	genotyped
rs12769953	22407656	C	A08 Viral and other specified intestinal infections	2.8058e-05	0.80352	0.225586	0.2288	0.992394
rs2239633	23589057	G	A08 Viral and other specified intestinal infections	-4.0763e-05	0.66532	0.4838	0.09197	genotyped
rs2290400	38066240	C	A08 Viral and other specified intestinal infections	-4.9594e-05	0.59886	0.4891	0.1986	genotyped
rs2390536	21485397	A	A08 Viral and other specified intestinal infections	-0.0001754	0.073639	0.363622	0.315	0.993467
rs3731249	21970916	C	A08 Viral and other specified intestinal infections	8.1009e-05	0.78046	0.02696	0.473	genotyped
rs3740540	126294167	G	A08 Viral and other specified intestinal infections	1.6187e-05	0.87882	0.2686	0.6892	genotyped
rs3824662	8104208	A	A08 Viral and other specified intestinal infections	-0.00018853	0.13259	0.171996	0.2615	0.988987
rs4617118	130156143	G	A08 Viral and other specified intestinal infections	-0.00037072	0.0028649	0.174868	0.6895	0.989614
rs4762284	96612762	T	A08 Viral and other specified intestinal infections	-0.00019784	0.055198	0.295513	0.7244	0.997309
rs7089424	63752159	T	A08 Viral and other specified intestinal infections	-0.00021793	0.02822	0.3416	0.0849	genotyped
rs10741006	22856019	C	A09 Diarrhoea and gastro-enteritis of presumed infectious origin	-0.00031606	0.18105	0.412258	0.3051	0.987636
rs11978267	50466304	A	A09 Diarrhoea and gastro-enteritis of presumed infectious origin	-6.7382e-05	0.79478	0.2752	0.9387	genotyped
rs12769953	22407656	C	A09 Diarrhoea and gastro-enteritis of presumed infectious origin	-8.7133e-05	0.75325	0.225586	0.2288	0.992394
rs2239633	23589057	G	A09 Diarrhoea and gastro-enteritis of presumed infectious origin	0.00015885	0.49261	0.4838	0.09197	genotyped
rs2290400	38066240	C	A09 Diarrhoea and gastro-enteritis of presumed infectious origin	0.00022596	0.32912	0.4891	0.1986	genotyped
rs2390536	21485397	A	A09 Diarrhoea and gastro-enteritis of presumed infectious origin	0.00015149	0.52934	0.363622	0.315	0.993467
rs3731249	21970916	C	A09 Diarrhoea and gastro-enteritis of presumed infectious origin	0.00052765	0.46007	0.02696	0.473	genotyped
rs3740540	126294167	G	A09 Diarrhoea and gastro-enteritis of presumed infectious origin	-0.00027899	0.28497	0.2686	0.6892	genotyped
rs3824662	8104208	A	A09 Diarrhoea and gastro-enteritis of presumed infectious origin	0.00040377	0.19	0.171996	0.2615	0.988987
rs4617118	130156143	G	A09 Diarrhoea and gastro-enteritis of presumed infectious origin	-0.00027549	0.36724	0.174868	0.6895	0.989614
rs4762284	96612762	T	A09 Diarrhoea and gastro-enteritis of presumed infectious origin	6.7256e-05	0.79079	0.295513	0.7244	0.997309
rs7089424	63752159	T	A09 Diarrhoea and gastro-enteritis of presumed infectious origin	-0.00012869	0.59804	0.3416	0.0849	genotyped
rs10741006	22856019	C	A30-A49 Other bacterial diseases	-7.8922e-05	0.73162	0.412258	0.3051	0.987636
rs11978267	50466304	A	A30-A49 Other bacterial diseases	-0.00030725	0.22344	0.2752	0.9387	genotyped
rs12769953	22407656	C	A30-A49 Other bacterial diseases	-0.00018838	0.48523	0.225586	0.2288	0.992394
rs2239633	23589057	G	A30-A49 Other bacterial diseases	0.0005703	0.011443	0.4838	0.09197	genotyped
rs2290400	38066240	C	A30-A49 Other bacterial diseases	5.8291e-05	0.79613	0.4891	0.1986	genotyped
rs2390536	21485397	A	A30-A49 Other bacterial diseases	0.00018741	0.42442	0.363622	0.315	0.993467
rs3731249	21970916	C	A30-A49 Other bacterial diseases	-8.4688e-05	0.90314	0.02696	0.473	genotyped
rs3740540	126294167	G	A30-A49 Other bacterial diseases	0.00059178	0.019861	0.2686	0.6892	genotyped
rs3824662	8104208	A	A30-A49 Other bacterial diseases	0.00089615	0.0028172	0.171996	0.2615	0.988987
rs4617118	130156143	G	A30-A49 Other bacterial diseases	-0.00038391	0.19711	0.174868	0.6895	0.989614
rs4762284	96612762	T	A30-A49 Other bacterial diseases	0.00048483	0.049702	0.295513	0.7244	0.997309
rs7089424	63752159	T	A30-A49 Other bacterial diseases	6.8874e-05	0.77201	0.3416	0.0849	genotyped
rs10741006	22856019	C	A41 Other septicaemia	6.8876e-05	0.73387	0.412258	0.3051	0.987636
rs11978267	50466304	A	A41 Other septicaemia	-0.00028834	0.19426	0.2752	0.9387	genotyped
rs12769953	22407656	C	A41 Other septicaemia	-0.00030548	0.19859	0.225586	0.2288	0.992394
rs2239633	23589057	G	A41 Other septicaemia	0.000366	0.065198	0.4838	0.09197	genotyped
rs2290400	38066240	C	A41 Other septicaemia	-2.7101e-05	0.89143	0.4891	0.1986	genotyped
rs2390536	21485397	A	A41 Other septicaemia	0.00027189	0.18798	0.363622	0.315	0.993467
rs3731249	21970916	C	A41 Other septicaemia	-0.00021973	0.71978	0.02696	0.473	genotyped
rs3740540	126294167	G	A41 Other septicaemia	0.00040443	0.07062	0.2686	0.6892	genotyped
rs3824662	8104208	A	A41 Other septicaemia	0.00079152	0.0027287	0.171996	0.2615	0.988987
rs4617118	130156143	G	A41 Other septicaemia	-0.00050226	0.055208	0.174868	0.6895	0.989614
rs4762284	96612762	T	A41 Other septicaemia	0.00042308	0.051685	0.295513	0.7244	0.997309
rs7089424	63752159	T	A41 Other septicaemia	8.8947e-05	0.67081	0.3416	0.0849	genotyped
rs10741006	22856019	C	A49 Bacterial infection of unspecified site	-0.00015847	0.082081	0.412258	0.3051	0.987636
rs11978267	50466304	A	A49 Bacterial infection of unspecified site	-6.2955e-05	0.52888	0.2752	0.9387	genotyped
rs12769953	22407656	C	A49 Bacterial infection of unspecified site	6.4194e-05	0.5482	0.225586	0.2288	0.992394
rs2239633	23589057	G	A49 Bacterial infection of unspecified site	0.00016598	0.063146	0.4838	0.09197	genotyped
rs2290400	38066240	C	A49 Bacterial infection of unspecified site	2.0616e-05	0.81752	0.4891	0.1986	genotyped
rs2390536	21485397	A	A49 Bacterial infection of unspecified site	-6.2245e-05	0.50304	0.363622	0.315	0.993467
rs3731249	21970916	C	A49 Bacterial infection of unspecified site	1.7592e-05	0.94909	0.02696	0.473	genotyped
rs3740540	126294167	G	A49 Bacterial infection of unspecified site	0.00016667	0.097702	0.2686	0.6892	genotyped
rs3824662	8104208	A	A49 Bacterial infection of unspecified site	1.7862e-05	0.88051	0.171996	0.2615	0.988987
rs4617118	130156143	G	A49 Bacterial infection of unspecified site	9.3402e-05	0.42815	0.174868	0.6895	0.989614
rs4762284	96612762	T	A49 Bacterial infection of unspecified site	3.6666e-05	0.70783	0.295513	0.7244	0.997309
rs7089424	63752159	T	A49 Bacterial infection of unspecified site	-9.6128e-05	0.30725	0.3416	0.0849	genotyped
rs10741006	22856019	C	abdominal hernia	0.00015355	0.33908	0.412258	0.3051	0.987636
rs11978267	50466304	A	abdominal hernia	-0.00015031	0.39349	0.2752	0.9387	genotyped
rs12769953	22407656	C	abdominal hernia	0.00022802	0.22618	0.225586	0.2288	0.992394
rs2239633	23589057	G	abdominal hernia	5.4794e-05	0.72777	0.4838	0.09197	genotyped
rs2290400	38066240	C	abdominal hernia	0.0002274	0.14866	0.4891	0.1986	genotyped
rs2390536	21485397	A	abdominal hernia	0.00015515	0.34344	0.363622	0.315	0.993467
rs3731249	21970916	C	abdominal hernia	-0.00040749	0.40127	0.02696	0.473	genotyped
rs3740540	126294167	G	abdominal hernia	-4.3332e-05	0.80699	0.2686	0.6892	genotyped
rs3824662	8104208	A	abdominal hernia	-0.00016888	0.42	0.171996	0.2615	0.988987
rs4617118	130156143	G	abdominal hernia	-0.00010148	0.62508	0.174868	0.6895	0.989614
rs4762284	96612762	T	abdominal hernia	0.00020919	0.22504	0.295513	0.7244	0.997309
rs7089424	63752159	T	abdominal hernia	2.7341e-05	0.86911	0.3416	0.0849	genotyped
rs10741006	22856019	C	Alcohol drinker status	-0.00076101	0.35005	0.412258	0.3051	0.987636
rs11978267	50466304	A	Alcohol drinker status	-0.0011261	0.20708	0.2752	0.9387	genotyped
rs12769953	22407656	C	Alcohol drinker status	-0.0018908	0.047764	0.225586	0.2288	0.992394
rs2239633	23589057	G	Alcohol drinker status	0.00035902	0.65248	0.4838	0.09197	genotyped
rs2290400	38066240	C	Alcohol drinker status	0.0012308	0.12283	0.4891	0.1986	genotyped
rs2390536	21485397	A	Alcohol drinker status	-0.00075137	0.36522	0.363622	0.315	0.993467
rs3731249	21970916	C	Alcohol drinker status	-0.00067778	0.78294	0.02696	0.473	genotyped
rs3740540	126294167	G	Alcohol drinker status	-0.00033676	0.70804	0.2686	0.6892	genotyped
rs3824662	8104208	A	Alcohol drinker status	-0.00035897	0.73529	0.171996	0.2615	0.988987
rs4617118	130156143	G	Alcohol drinker status	0.0018031	0.086624	0.174868	0.6895	0.989614
rs4762284	96612762	T	Alcohol drinker status	-0.00039433	0.65165	0.295513	0.7244	0.997309
rs7089424	63752159	T	Alcohol drinker status	0.00066517	0.4291	0.3416	0.0849	genotyped
rs10741006	22856019	C	Alcohol intake frequency.	0.0088282	0.0022367	0.412258	0.3051	0.987636
rs11978267	50466304	A	Alcohol intake frequency.	0.00235	0.45851	0.2752	0.9387	genotyped
rs12769953	22407656	C	Alcohol intake frequency.	0.0037161	0.27265	0.225586	0.2288	0.992394
rs2239633	23589057	G	Alcohol intake frequency.	-0.0022651	0.42286	0.4838	0.09197	genotyped
rs2290400	38066240	C	Alcohol intake frequency.	-0.0084339	0.0028511	0.4891	0.1986	genotyped
rs2390536	21485397	A	Alcohol intake frequency.	-0.0028152	0.33946	0.363622	0.315	0.993467
rs3731249	21970916	C	Alcohol intake frequency.	0.0013587	0.87627	0.02696	0.473	genotyped
rs3740540	126294167	G	Alcohol intake frequency.	-0.0041918	0.1887	0.2686	0.6892	genotyped
rs3824662	8104208	A	Alcohol intake frequency.	0.0052861	0.16035	0.171996	0.2615	0.988987
rs4617118	130156143	G	Alcohol intake frequency.	-0.00015716	0.96642	0.174868	0.6895	0.989614
rs4762284	96612762	T	Alcohol intake frequency.	0.0063516	0.040326	0.295513	0.7244	0.997309
rs7089424	63752159	T	Alcohol intake frequency.	0.0011006	0.71218	0.3416	0.0849	genotyped
rs10741006	22856019	C	allergy or anaphylactic reaction to drug	-1.2382e-05	0.95024	0.412258	0.3051	0.987636
rs11978267	50466304	A	allergy or anaphylactic reaction to drug	-0.00033628	0.12221	0.2752	0.9387	genotyped
rs12769953	22407656	C	allergy or anaphylactic reaction to drug	-0.00018989	0.41454	0.225586	0.2288	0.992394
rs2239633	23589057	G	allergy or anaphylactic reaction to drug	-4.9112e-06	0.97985	0.4838	0.09197	genotyped
rs2290400	38066240	C	allergy or anaphylactic reaction to drug	-5.0692e-05	0.79439	0.4891	0.1986	genotyped
rs2390536	21485397	A	allergy or anaphylactic reaction to drug	-0.00033673	0.095964	0.363622	0.315	0.993467
rs3731249	21970916	C	allergy or anaphylactic reaction to drug	0.00071606	0.23262	0.02696	0.473	genotyped
rs3740540	126294167	G	allergy or anaphylactic reaction to drug	0.00029388	0.17981	0.2686	0.6892	genotyped
rs3824662	8104208	A	allergy or anaphylactic reaction to drug	0.00023874	0.35607	0.171996	0.2615	0.988987
rs4617118	130156143	G	allergy or anaphylactic reaction to drug	0.00022782	0.37463	0.174868	0.6895	0.989614
rs4762284	96612762	T	allergy or anaphylactic reaction to drug	0.00014863	0.48524	0.295513	0.7244	0.997309
rs7089424	63752159	T	allergy or anaphylactic reaction to drug	0.00020218	0.32392	0.3416	0.0849	genotyped
rs10741006	22856019	C	allergy or anaphylactic reaction to food	-2.2204e-06	0.98765	0.412258	0.3051	0.987636
rs11978267	50466304	A	allergy or anaphylactic reaction to food	-0.00015545	0.32293	0.2752	0.9387	genotyped
rs12769953	22407656	C	allergy or anaphylactic reaction to food	0.00016289	0.33304	0.225586	0.2288	0.992394
rs2239633	23589057	G	allergy or anaphylactic reaction to food	6.9099e-05	0.623	0.4838	0.09197	genotyped
rs2290400	38066240	C	allergy or anaphylactic reaction to food	-0.00017918	0.20248	0.4891	0.1986	genotyped
rs2390536	21485397	A	allergy or anaphylactic reaction to food	0.00012223	0.40314	0.363622	0.315	0.993467
rs3731249	21970916	C	allergy or anaphylactic reaction to food	0.00073155	0.09155	0.02696	0.473	genotyped
rs3740540	126294167	G	allergy or anaphylactic reaction to food	-9.9109e-05	0.53153	0.2686	0.6892	genotyped
rs3824662	8104208	A	allergy or anaphylactic reaction to food	0.00025672	0.16987	0.171996	0.2615	0.988987
rs4617118	130156143	G	allergy or anaphylactic reaction to food	0.00013577	0.46407	0.174868	0.6895	0.989614
rs4762284	96612762	T	allergy or anaphylactic reaction to food	0.0001561	0.3105	0.295513	0.7244	0.997309
rs7089424	63752159	T	allergy or anaphylactic reaction to food	0.00010041	0.49804	0.3416	0.0849	genotyped
rs10741006	22856019	C	allergy/hypersensitivity/anaphylaxis	-0.00060191	0.26932	0.412258	0.3051	0.987636
rs11978267	50466304	A	allergy/hypersensitivity/anaphylaxis	-0.00031764	0.59503	0.2752	0.9387	genotyped
rs12769953	22407656	C	allergy/hypersensitivity/anaphylaxis	0.0010177	0.11132	0.225586	0.2288	0.992394
rs2239633	23589057	G	allergy/hypersensitivity/anaphylaxis	-0.00057038	0.28529	0.4838	0.09197	genotyped
rs2290400	38066240	C	allergy/hypersensitivity/anaphylaxis	-0.0028387	1.0661e-07	0.4891	0.1986	genotyped
rs2390536	21485397	A	allergy/hypersensitivity/anaphylaxis	8.311e-05	0.88108	0.363622	0.315	0.993467
rs3731249	21970916	C	allergy/hypersensitivity/anaphylaxis	0.0013912	0.39852	0.02696	0.473	genotyped
rs3740540	126294167	G	allergy/hypersensitivity/anaphylaxis	-0.00010399	0.86279	0.2686	0.6892	genotyped
rs3824662	8104208	A	allergy/hypersensitivity/anaphylaxis	0.0017767	0.012386	0.171996	0.2615	0.988987
rs4617118	130156143	G	allergy/hypersensitivity/anaphylaxis	-0.00062624	0.37398	0.174868	0.6895	0.989614
rs4762284	96612762	T	allergy/hypersensitivity/anaphylaxis	-5.4163e-05	0.92622	0.295513	0.7244	0.997309
rs7089424	63752159	T	allergy/hypersensitivity/anaphylaxis	0.0011515	0.040777	0.3416	0.0849	genotyped
rs10741006	22856019	C	anaemia	-9.8449e-05	0.64595	0.412258	0.3051	0.987636
rs11978267	50466304	A	anaemia	0.00021849	0.35241	0.2752	0.9387	genotyped
rs12769953	22407656	C	anaemia	0.00031801	0.20584	0.225586	0.2288	0.992394
rs2239633	23589057	G	anaemia	3.9898e-05	0.84931	0.4838	0.09197	genotyped
rs2290400	38066240	C	anaemia	-4.6687e-05	0.8241	0.4891	0.1986	genotyped
rs2390536	21485397	A	anaemia	-1.5744e-05	0.94254	0.363622	0.315	0.993467
rs3731249	21970916	C	anaemia	-0.00031237	0.62968	0.02696	0.473	genotyped
rs3740540	126294167	G	anaemia	-0.00018208	0.44164	0.2686	0.6892	genotyped
rs3824662	8104208	A	anaemia	0.00066579	0.017177	0.171996	0.2615	0.988987
rs4617118	130156143	G	anaemia	0.00025387	0.35948	0.174868	0.6895	0.989614
rs4762284	96612762	T	anaemia	-0.0002512	0.27466	0.295513	0.7244	0.997309
rs7089424	63752159	T	anaemia	0.00017735	0.42305	0.3416	0.0849	genotyped
rs10741006	22856019	C	anal problem	8.9343e-05	0.46123	0.412258	0.3051	0.987636
rs11978267	50466304	A	anal problem	3.8075e-05	0.77461	0.2752	0.9387	genotyped
rs12769953	22407656	C	anal problem	7.2046e-05	0.61247	0.225586	0.2288	0.992394
rs2239633	23589057	G	anal problem	-0.00015856	0.18203	0.4838	0.09197	genotyped
rs2290400	38066240	C	anal problem	0.00010007	0.3998	0.4891	0.1986	genotyped
rs2390536	21485397	A	anal problem	-0.00011295	0.36085	0.363622	0.315	0.993467
rs3731249	21970916	C	anal problem	-0.00049218	0.17934	0.02696	0.473	genotyped
rs3740540	126294167	G	anal problem	3.2943e-05	0.80565	0.2686	0.6892	genotyped
rs3824662	8104208	A	anal problem	8.3336e-05	0.59809	0.171996	0.2615	0.988987
rs4617118	130156143	G	anal problem	0.000301	0.054948	0.174868	0.6895	0.989614
rs4762284	96612762	T	anal problem	0.00011319	0.38438	0.295513	0.7244	0.997309
rs7089424	63752159	T	anal problem	7.6238e-05	0.54275	0.3416	0.0849	genotyped
rs10741006	22856019	C	angina	0.00047747	0.18764	0.412258	0.3051	0.987636
rs11978267	50466304	A	angina	0.00074184	0.061964	0.2752	0.9387	genotyped
rs12769953	22407656	C	angina	-4.5816e-05	0.91416	0.225586	0.2288	0.992394
rs2239633	23589057	G	angina	-0.00014084	0.69155	0.4838	0.09197	genotyped
rs2290400	38066240	C	angina	2.5771e-05	0.94217	0.4891	0.1986	genotyped
rs2390536	21485397	A	angina	0.00042955	0.245	0.363622	0.315	0.993467
rs3731249	21970916	C	angina	-0.0029994	0.0062299	0.02696	0.473	genotyped
rs3740540	126294167	G	angina	0.00016848	0.67372	0.2686	0.6892	genotyped
rs3824662	8104208	A	angina	-0.00061239	0.19492	0.171996	0.2615	0.988987
rs4617118	130156143	G	angina	0.00020302	0.66485	0.174868	0.6895	0.989614
rs4762284	96612762	T	angina	0.0006806	0.080247	0.295513	0.7244	0.997309
rs7089424	63752159	T	angina	-4.8892e-05	0.89608	0.3416	0.0849	genotyped
rs10741006	22856019	C	ankylosing spondylitis	-5.9657e-05	0.59092	0.412258	0.3051	0.987636
rs11978267	50466304	A	ankylosing spondylitis	-7.0867e-05	0.56048	0.2752	0.9387	genotyped
rs12769953	22407656	C	ankylosing spondylitis	1.4125e-05	0.9136	0.225586	0.2288	0.992394
rs2239633	23589057	G	ankylosing spondylitis	-2.7449e-07	0.99799	0.4838	0.09197	genotyped
rs2290400	38066240	C	ankylosing spondylitis	-3.9874e-06	0.97076	0.4891	0.1986	genotyped
rs2390536	21485397	A	ankylosing spondylitis	-9.6815e-05	0.39231	0.363622	0.315	0.993467
rs3731249	21970916	C	ankylosing spondylitis	0.00042604	0.20421	0.02696	0.473	genotyped
rs3740540	126294167	G	ankylosing spondylitis	-0.00014317	0.24273	0.2686	0.6892	genotyped
rs3824662	8104208	A	ankylosing spondylitis	7.4541e-05	0.60646	0.171996	0.2615	0.988987
rs4617118	130156143	G	ankylosing spondylitis	0.00026395	0.06593	0.174868	0.6895	0.989614
rs4762284	96612762	T	ankylosing spondylitis	-0.00014664	0.2184	0.295513	0.7244	0.997309
rs7089424	63752159	T	ankylosing spondylitis	0.00018813	0.10082	0.3416	0.0849	genotyped
rs10741006	22856019	C	anxiety/panic attacks	0.00043082	0.084182	0.412258	0.3051	0.987636
rs11978267	50466304	A	anxiety/panic attacks	0.0001886	0.49064	0.2752	0.9387	genotyped
rs12769953	22407656	C	anxiety/panic attacks	0.00057754	0.048422	0.225586	0.2288	0.992394
rs2239633	23589057	G	anxiety/panic attacks	-5.3214e-05	0.82763	0.4838	0.09197	genotyped
rs2290400	38066240	C	anxiety/panic attacks	0.00032241	0.18733	0.4891	0.1986	genotyped
rs2390536	21485397	A	anxiety/panic attacks	0.00016548	0.51533	0.363622	0.315	0.993467
rs3731249	21970916	C	anxiety/panic attacks	-0.0004154	0.58175	0.02696	0.473	genotyped
rs3740540	126294167	G	anxiety/panic attacks	2.6324e-05	0.92387	0.2686	0.6892	genotyped
rs3824662	8104208	A	anxiety/panic attacks	0.00025719	0.4291	0.171996	0.2615	0.988987
rs4617118	130156143	G	anxiety/panic attacks	5.8173e-05	0.85687	0.174868	0.6895	0.989614
rs4762284	96612762	T	anxiety/panic attacks	0.00017595	0.51095	0.295513	0.7244	0.997309
rs7089424	63752159	T	anxiety/panic attacks	7.1237e-06	0.97795	0.3416	0.0849	genotyped
rs10741006	22856019	C	appendicitis	-0.00025119	0.19406	0.412258	0.3051	0.987636
rs11978267	50466304	A	appendicitis	-0.00022826	0.28184	0.2752	0.9387	genotyped
rs12769953	22407656	C	appendicitis	-0.00027412	0.22695	0.225586	0.2288	0.992394
rs2239633	23589057	G	appendicitis	5.5099e-05	0.77121	0.4838	0.09197	genotyped
rs2290400	38066240	C	appendicitis	-0.00040615	0.032187	0.4891	0.1986	genotyped
rs2390536	21485397	A	appendicitis	-2.3085e-05	0.9068	0.363622	0.315	0.993467
rs3731249	21970916	C	appendicitis	-0.00037969	0.51615	0.02696	0.473	genotyped
rs3740540	126294167	G	appendicitis	0.00015617	0.46465	0.2686	0.6892	genotyped
rs3824662	8104208	A	appendicitis	0.00014912	0.55429	0.171996	0.2615	0.988987
rs4617118	130156143	G	appendicitis	-8.6103e-05	0.73053	0.174868	0.6895	0.989614
rs4762284	96612762	T	appendicitis	0.0002928	0.15836	0.295513	0.7244	0.997309
rs7089424	63752159	T	appendicitis	-0.00012434	0.53375	0.3416	0.0849	genotyped
rs10741006	22856019	C	Arm fat mass (left)	-0.0049193	4.1686e-05	0.412258	0.3051	0.987636
rs11978267	50466304	A	Arm fat mass (left)	-0.0069062	1.5985e-07	0.2752	0.9387	genotyped
rs12769953	22407656	C	Arm fat mass (left)	0.0045758	0.0011554	0.225586	0.2288	0.992394
rs2239633	23589057	G	Arm fat mass (left)	0.0017497	0.13598	0.4838	0.09197	genotyped
rs2290400	38066240	C	Arm fat mass (left)	0.00071808	0.54062	0.4891	0.1986	genotyped
rs2390536	21485397	A	Arm fat mass (left)	-0.0025729	0.035712	0.363622	0.315	0.993467
rs3731249	21970916	C	Arm fat mass (left)	0.00055755	0.87784	0.02696	0.473	genotyped
rs3740540	126294167	G	Arm fat mass (left)	-0.00288	0.029806	0.2686	0.6892	genotyped
rs3824662	8104208	A	Arm fat mass (left)	0.00040743	0.79462	0.171996	0.2615	0.988987
rs4617118	130156143	G	Arm fat mass (left)	0.00043267	0.78046	0.174868	0.6895	0.989614
rs4762284	96612762	T	Arm fat mass (left)	0.0012411	0.33564	0.295513	0.7244	0.997309
rs7089424	63752159	T	Arm fat mass (left)	-0.00045726	0.71232	0.3416	0.0849	genotyped
rs10741006	22856019	C	Arm fat mass (right)	-0.0047535	9.7446e-06	0.412258	0.3051	0.987636
rs11978267	50466304	A	Arm fat mass (right)	-0.0059828	3.9691e-07	0.2752	0.9387	genotyped
rs12769953	22407656	C	Arm fat mass (right)	0.0040461	0.0013302	0.225586	0.2288	0.992394
rs2239633	23589057	G	Arm fat mass (right)	0.0013867	0.18695	0.4838	0.09197	genotyped
rs2290400	38066240	C	Arm fat mass (right)	0.0006915	0.51047	0.4891	0.1986	genotyped
rs2390536	21485397	A	Arm fat mass (right)	-0.0022495	0.0403	0.363622	0.315	0.993467
rs3731249	21970916	C	Arm fat mass (right)	0.0010211	0.75321	0.02696	0.473	genotyped
rs3740540	126294167	G	Arm fat mass (right)	-0.0026209	0.027221	0.2686	0.6892	genotyped
rs3824662	8104208	A	Arm fat mass (right)	0.00053094	0.70477	0.171996	0.2615	0.988987
rs4617118	130156143	G	Arm fat mass (right)	0.00045506	0.74339	0.174868	0.6895	0.989614
rs4762284	96612762	T	Arm fat mass (right)	0.0012466	0.2801	0.295513	0.7244	0.997309
rs7089424	63752159	T	Arm fat mass (right)	-0.00073971	0.50525	0.3416	0.0849	genotyped
rs10741006	22856019	C	Arm fat percentage (left)	-0.044811	0.00065988	0.412258	0.3051	0.987636
rs11978267	50466304	A	Arm fat percentage (left)	-0.061305	2.1915e-05	0.2752	0.9387	genotyped
rs12769953	22407656	C	Arm fat percentage (left)	0.035581	0.021142	0.225586	0.2288	0.992394
rs2239633	23589057	G	Arm fat percentage (left)	0.009584	0.45614	0.4838	0.09197	genotyped
rs2290400	38066240	C	Arm fat percentage (left)	0.00083083	0.94851	0.4891	0.1986	genotyped
rs2390536	21485397	A	Arm fat percentage (left)	-0.038879	0.0037867	0.363622	0.315	0.993467
rs3731249	21970916	C	Arm fat percentage (left)	0.045143	0.25633	0.02696	0.473	genotyped
rs3740540	126294167	G	Arm fat percentage (left)	-0.045312	0.0018163	0.2686	0.6892	genotyped
rs3824662	8104208	A	Arm fat percentage (left)	0.0057221	0.73871	0.171996	0.2615	0.988987
rs4617118	130156143	G	Arm fat percentage (left)	-0.013007	0.44453	0.174868	0.6895	0.989614
rs4762284	96612762	T	Arm fat percentage (left)	0.0085062	0.54722	0.295513	0.7244	0.997309
rs7089424	63752159	T	Arm fat percentage (left)	-0.00023453	0.98623	0.3416	0.0849	genotyped
rs10741006	22856019	C	Arm fat percentage (right)	-0.048505	0.00020899	0.412258	0.3051	0.987636
rs11978267	50466304	A	Arm fat percentage (right)	-0.059139	3.8239e-05	0.2752	0.9387	genotyped
rs12769953	22407656	C	Arm fat percentage (right)	0.031426	0.040552	0.225586	0.2288	0.992394
rs2239633	23589057	G	Arm fat percentage (right)	0.0069951	0.58439	0.4838	0.09197	genotyped
rs2290400	38066240	C	Arm fat percentage (right)	-0.0014153	0.9119	0.4891	0.1986	genotyped
rs2390536	21485397	A	Arm fat percentage (right)	-0.038981	0.0035051	0.363622	0.315	0.993467
rs3731249	21970916	C	Arm fat percentage (right)	0.039833	0.31384	0.02696	0.473	genotyped
rs3740540	126294167	G	Arm fat percentage (right)	-0.042573	0.0032059	0.2686	0.6892	genotyped
rs3824662	8104208	A	Arm fat percentage (right)	0.0088929	0.60208	0.171996	0.2615	0.988987
rs4617118	130156143	G	Arm fat percentage (right)	-0.0080866	0.63261	0.174868	0.6895	0.989614
rs4762284	96612762	T	Arm fat percentage (right)	0.0107	0.44637	0.295513	0.7244	0.997309
rs7089424	63752159	T	Arm fat percentage (right)	-0.0045258	0.73769	0.3416	0.0849	genotyped
rs10741006	22856019	C	Arm fat-free mass (left)	-0.0045244	7.7805e-09	0.412258	0.3051	0.987636
rs11978267	50466304	A	Arm fat-free mass (left)	-0.0039557	4.344e-06	0.2752	0.9387	genotyped
rs12769953	22407656	C	Arm fat-free mass (left)	0.0031306	0.00066014	0.225586	0.2288	0.992394
rs2239633	23589057	G	Arm fat-free mass (left)	0.00083712	0.27419	0.4838	0.09197	genotyped
rs2290400	38066240	C	Arm fat-free mass (left)	0.00104	0.17514	0.4891	0.1986	genotyped
rs2390536	21485397	A	Arm fat-free mass (left)	-0.00026146	0.74395	0.363622	0.315	0.993467
rs3731249	21970916	C	Arm fat-free mass (left)	-0.0012841	0.58748	0.02696	0.473	genotyped
rs3740540	126294167	G	Arm fat-free mass (left)	-0.0027195	0.0016748	0.2686	0.6892	genotyped
rs3824662	8104208	A	Arm fat-free mass (left)	0.0011254	0.2707	0.171996	0.2615	0.988987
rs4617118	130156143	G	Arm fat-free mass (left)	0.0020347	0.04474	0.174868	0.6895	0.989614
rs4762284	96612762	T	Arm fat-free mass (left)	0.0013243	0.11641	0.295513	0.7244	0.997309
rs7089424	63752159	T	Arm fat-free mass (left)	-0.00096632	0.23262	0.3416	0.0849	genotyped
rs10741006	22856019	C	Arm fat-free mass (right)	-0.0039422	8.3476e-08	0.412258	0.3051	0.987636
rs11978267	50466304	A	Arm fat-free mass (right)	-0.0035511	1.1105e-05	0.2752	0.9387	genotyped
rs12769953	22407656	C	Arm fat-free mass (right)	0.0027987	0.0011796	0.225586	0.2288	0.992394
rs2239633	23589057	G	Arm fat-free mass (right)	0.00097748	0.17369	0.4838	0.09197	genotyped
rs2290400	38066240	C	Arm fat-free mass (right)	0.0012055	0.094036	0.4891	0.1986	genotyped
rs2390536	21485397	A	Arm fat-free mass (right)	-0.00032303	0.66721	0.363622	0.315	0.993467
rs3731249	21970916	C	Arm fat-free mass (right)	-0.00075251	0.73486	0.02696	0.473	genotyped
rs3740540	126294167	G	Arm fat-free mass (right)	-0.0026907	0.00092401	0.2686	0.6892	genotyped
rs3824662	8104208	A	Arm fat-free mass (right)	0.0011536	0.229	0.171996	0.2615	0.988987
rs4617118	130156143	G	Arm fat-free mass (right)	0.0014952	0.11604	0.174868	0.6895	0.989614
rs4762284	96612762	T	Arm fat-free mass (right)	0.001106	0.16238	0.295513	0.7244	0.997309
rs7089424	63752159	T	Arm fat-free mass (right)	-0.00055299	0.46675	0.3416	0.0849	genotyped
rs10741006	22856019	C	Arm predicted mass (left)	-0.0043183	5.0845e-09	0.412258	0.3051	0.987636
rs11978267	50466304	A	Arm predicted mass (left)	-0.0036646	6.3574e-06	0.2752	0.9387	genotyped
rs12769953	22407656	C	Arm predicted mass (left)	0.0030105	0.00051356	0.225586	0.2288	0.992394
rs2239633	23589057	G	Arm predicted mass (left)	0.00073214	0.31039	0.4838	0.09197	genotyped
rs2290400	38066240	C	Arm predicted mass (left)	0.0009686	0.18042	0.4891	0.1986	genotyped
rs2390536	21485397	A	Arm predicted mass (left)	-0.00035029	0.64255	0.363622	0.315	0.993467
rs3731249	21970916	C	Arm predicted mass (left)	-0.0011974	0.59157	0.02696	0.473	genotyped
rs3740540	126294167	G	Arm predicted mass (left)	-0.0026585	0.0011205	0.2686	0.6892	genotyped
rs3824662	8104208	A	Arm predicted mass (left)	0.0012909	0.18023	0.171996	0.2615	0.988987
rs4617118	130156143	G	Arm predicted mass (left)	0.0018495	0.052961	0.174868	0.6895	0.989614
rs4762284	96612762	T	Arm predicted mass (left)	0.0012626	0.11232	0.295513	0.7244	0.997309
rs7089424	63752159	T	Arm predicted mass (left)	-0.000895	0.24096	0.3416	0.0849	genotyped
rs10741006	22856019	C	Arm predicted mass (right)	-0.0036236	1.7308e-07	0.412258	0.3051	0.987636
rs11978267	50466304	A	Arm predicted mass (right)	-0.0033035	1.4446e-05	0.2752	0.9387	genotyped
rs12769953	22407656	C	Arm predicted mass (right)	0.0026514	0.0011136	0.225586	0.2288	0.992394
rs2239633	23589057	G	Arm predicted mass (right)	0.00096291	0.15513	0.4838	0.09197	genotyped
rs2290400	38066240	C	Arm predicted mass (right)	0.0010991	0.10531	0.4891	0.1986	genotyped
rs2390536	21485397	A	Arm predicted mass (right)	-0.00012582	0.85898	0.363622	0.315	0.993467
rs3731249	21970916	C	Arm predicted mass (right)	-0.00049341	0.81375	0.02696	0.473	genotyped
rs3740540	126294167	G	Arm predicted mass (right)	-0.002563	0.00081522	0.2686	0.6892	genotyped
rs3824662	8104208	A	Arm predicted mass (right)	0.0011427	0.20621	0.171996	0.2615	0.988987
rs4617118	130156143	G	Arm predicted mass (right)	0.0014018	0.11804	0.174868	0.6895	0.989614
rs4762284	96612762	T	Arm predicted mass (right)	0.0010687	0.1521	0.295513	0.7244	0.997309
rs7089424	63752159	T	Arm predicted mass (right)	-0.00051779	0.46972	0.3416	0.0849	genotyped
rs10741006	22856019	C	arthritis (nos)	0.00023187	0.20971	0.412258	0.3051	0.987636
rs11978267	50466304	A	arthritis (nos)	-5.9712e-05	0.76833	0.2752	0.9387	genotyped
rs12769953	22407656	C	arthritis (nos)	0.00016009	0.46031	0.225586	0.2288	0.992394
rs2239633	23589057	G	arthritis (nos)	0.00013805	0.44591	0.4838	0.09197	genotyped
rs2290400	38066240	C	arthritis (nos)	0.00019801	0.27451	0.4891	0.1986	genotyped
rs2390536	21485397	A	arthritis (nos)	-9.8728e-05	0.60037	0.363622	0.315	0.993467
rs3731249	21970916	C	arthritis (nos)	2.795e-05	0.9601	0.02696	0.473	genotyped
rs3740540	126294167	G	arthritis (nos)	-3.4293e-05	0.86658	0.2686	0.6892	genotyped
rs3824662	8104208	A	arthritis (nos)	0.00023103	0.33775	0.171996	0.2615	0.988987
rs4617118	130156143	G	arthritis (nos)	9.2913e-05	0.69744	0.174868	0.6895	0.989614
rs4762284	96612762	T	arthritis (nos)	-0.00010457	0.59812	0.295513	0.7244	0.997309
rs7089424	63752159	T	arthritis (nos)	-0.00039477	0.038699	0.3416	0.0849	genotyped
rs10741006	22856019	C	asthma	-0.0020398	0.0015447	0.412258	0.3051	0.987636
rs11978267	50466304	A	asthma	-0.0012934	0.066865	0.2752	0.9387	genotyped
rs12769953	22407656	C	asthma	0.0018531	0.014196	0.225586	0.2288	0.992394
rs2239633	23589057	G	asthma	-1.4109e-05	0.98213	0.4838	0.09197	genotyped
rs2290400	38066240	C	asthma	-0.010546	1.1438e-62	0.4891	0.1986	genotyped
rs2390536	21485397	A	asthma	0.00028151	0.6679	0.363622	0.315	0.993467
rs3731249	21970916	C	asthma	-0.0014198	0.46571	0.02696	0.473	genotyped
rs3740540	126294167	G	asthma	-0.00018024	0.79999	0.2686	0.6892	genotyped
rs3824662	8104208	A	asthma	0.0044569	1.1196e-07	0.171996	0.2615	0.988987
rs4617118	130156143	G	asthma	-0.0011926	0.15157	0.174868	0.6895	0.989614
rs4762284	96612762	T	asthma	0.00038999	0.5724	0.295513	0.7244	0.997309
rs7089424	63752159	T	asthma	0.00042115	0.52685	0.3416	0.0849	genotyped
rs10741006	22856019	C	B00-B09 Viral infections characterized by skin and mucous membrane lesions	0.00029204	0.02847	0.412258	0.3051	0.987636
rs11978267	50466304	A	B00-B09 Viral infections characterized by skin and mucous membrane lesions	5.5928e-05	0.70207	0.2752	0.9387	genotyped
rs12769953	22407656	C	B00-B09 Viral infections characterized by skin and mucous membrane lesions	0.00015844	0.31093	0.225586	0.2288	0.992394
rs2239633	23589057	G	B00-B09 Viral infections characterized by skin and mucous membrane lesions	-8.8883e-06	0.94576	0.4838	0.09197	genotyped
rs2290400	38066240	C	B00-B09 Viral infections characterized by skin and mucous membrane lesions	-0.00010531	0.42037	0.4891	0.1986	genotyped
rs2390536	21485397	A	B00-B09 Viral infections characterized by skin and mucous membrane lesions	0.00016946	0.2125	0.363622	0.315	0.993467
rs3731249	21970916	C	B00-B09 Viral infections characterized by skin and mucous membrane lesions	-2.2197e-05	0.95607	0.02696	0.473	genotyped
rs3740540	126294167	G	B00-B09 Viral infections characterized by skin and mucous membrane lesions	0.0002147	0.14468	0.2686	0.6892	genotyped
rs3824662	8104208	A	B00-B09 Viral infections characterized by skin and mucous membrane lesions	0.0001181	0.49681	0.171996	0.2615	0.988987
rs4617118	130156143	G	B00-B09 Viral infections characterized by skin and mucous membrane lesions	0.0001463	0.39599	0.174868	0.6895	0.989614
rs4762284	96612762	T	B00-B09 Viral infections characterized by skin and mucous membrane lesions	0.00032314	0.02389	0.295513	0.7244	0.997309
rs7089424	63752159	T	B00-B09 Viral infections characterized by skin and mucous membrane lesions	-0.00010936	0.42708	0.3416	0.0849	genotyped
rs10741006	22856019	C	B07 Viral warts	4.2579e-05	0.63122	0.412258	0.3051	0.987636
rs11978267	50466304	A	B07 Viral warts	6.4248e-06	0.94735	0.2752	0.9387	genotyped
rs12769953	22407656	C	B07 Viral warts	0.00011448	0.27123	0.225586	0.2288	0.992394
rs2239633	23589057	G	B07 Viral warts	5.055e-05	0.5609	0.4838	0.09197	genotyped
rs2290400	38066240	C	B07 Viral warts	-0.00013761	0.11363	0.4891	0.1986	genotyped
rs2390536	21485397	A	B07 Viral warts	7.6863e-06	0.93228	0.363622	0.315	0.993467
rs3731249	21970916	C	B07 Viral warts	-0.00040817	0.12793	0.02696	0.473	genotyped
rs3740540	126294167	G	B07 Viral warts	5.3173e-05	0.58722	0.2686	0.6892	genotyped
rs3824662	8104208	A	B07 Viral warts	0.00011332	0.32716	0.171996	0.2615	0.988987
rs4617118	130156143	G	B07 Viral warts	1.373e-05	0.90472	0.174868	0.6895	0.989614
rs4762284	96612762	T	B07 Viral warts	0.00019196	0.043786	0.295513	0.7244	0.997309
rs7089424	63752159	T	B07 Viral warts	-9.2175e-05	0.31444	0.3416	0.0849	genotyped
rs10741006	22856019	C	B15-B19 Viral hepatitis	0.00013445	0.09189	0.412258	0.3051	0.987636
rs11978267	50466304	A	B15-B19 Viral hepatitis	8.6226e-06	0.92147	0.2752	0.9387	genotyped
rs12769953	22407656	C	B15-B19 Viral hepatitis	1.6554e-05	0.85957	0.225586	0.2288	0.992394
rs2239633	23589057	G	B15-B19 Viral hepatitis	-5.146e-05	0.5102	0.4838	0.09197	genotyped
rs2290400	38066240	C	B15-B19 Viral hepatitis	4.7101e-05	0.54689	0.4891	0.1986	genotyped
rs2390536	21485397	A	B15-B19 Viral hepatitis	2.5e-05	0.75849	0.363622	0.315	0.993467
rs3731249	21970916	C	B15-B19 Viral hepatitis	6.8987e-05	0.77473	0.02696	0.473	genotyped
rs3740540	126294167	G	B15-B19 Viral hepatitis	-1.1133e-05	0.89942	0.2686	0.6892	genotyped
rs3824662	8104208	A	B15-B19 Viral hepatitis	8.7769e-05	0.3987	0.171996	0.2615	0.988987
rs4617118	130156143	G	B15-B19 Viral hepatitis	0.00015737	0.12704	0.174868	0.6895	0.989614
rs4762284	96612762	T	B15-B19 Viral hepatitis	-2.9775e-05	0.72784	0.295513	0.7244	0.997309
rs7089424	63752159	T	B15-B19 Viral hepatitis	-6.525e-05	0.42843	0.3416	0.0849	genotyped
rs10741006	22856019	C	B25-B34 Other viral diseases	-1.7151e-05	0.90641	0.412258	0.3051	0.987636
rs11978267	50466304	A	B25-B34 Other viral diseases	-0.00015979	0.31779	0.2752	0.9387	genotyped
rs12769953	22407656	C	B25-B34 Other viral diseases	0.00011784	0.49101	0.225586	0.2288	0.992394
rs2239633	23589057	G	B25-B34 Other viral diseases	0.00024849	0.082194	0.4838	0.09197	genotyped
rs2290400	38066240	C	B25-B34 Other viral diseases	-0.00015304	0.28443	0.4891	0.1986	genotyped
rs2390536	21485397	A	B25-B34 Other viral diseases	-5.8623e-05	0.69341	0.363622	0.315	0.993467
rs3731249	21970916	C	B25-B34 Other viral diseases	0.00054021	0.22064	0.02696	0.473	genotyped
rs3740540	126294167	G	B25-B34 Other viral diseases	-0.00013119	0.41539	0.2686	0.6892	genotyped
rs3824662	8104208	A	B25-B34 Other viral diseases	9.8625e-05	0.60406	0.171996	0.2615	0.988987
rs4617118	130156143	G	B25-B34 Other viral diseases	0.00026839	0.15491	0.174868	0.6895	0.989614
rs4762284	96612762	T	B25-B34 Other viral diseases	0.00035111	0.024954	0.295513	0.7244	0.997309
rs7089424	63752159	T	B25-B34 Other viral diseases	-0.00021969	0.14485	0.3416	0.0849	genotyped
rs10741006	22856019	C	B34 Viral infection of unspecified site	7.9335e-05	0.56623	0.412258	0.3051	0.987636
rs11978267	50466304	A	B34 Viral infection of unspecified site	-0.00016671	0.27173	0.2752	0.9387	genotyped
rs12769953	22407656	C	B34 Viral infection of unspecified site	0.00019962	0.21853	0.225586	0.2288	0.992394
rs2239633	23589057	G	B34 Viral infection of unspecified site	0.00022871	0.09159	0.4838	0.09197	genotyped
rs2290400	38066240	C	B34 Viral infection of unspecified site	-0.00010222	0.45091	0.4891	0.1986	genotyped
rs2390536	21485397	A	B34 Viral infection of unspecified site	1.8642e-05	0.89482	0.363622	0.315	0.993467
rs3731249	21970916	C	B34 Viral infection of unspecified site	0.00043399	0.29939	0.02696	0.473	genotyped
rs3740540	126294167	G	B34 Viral infection of unspecified site	-0.00010721	0.48268	0.2686	0.6892	genotyped
rs3824662	8104208	A	B34 Viral infection of unspecified site	0.00017609	0.3288	0.171996	0.2615	0.988987
rs4617118	130156143	G	B34 Viral infection of unspecified site	0.00023201	0.19471	0.174868	0.6895	0.989614
rs4762284	96612762	T	B34 Viral infection of unspecified site	0.00031951	0.031405	0.295513	0.7244	0.997309
rs7089424	63752159	T	B34 Viral infection of unspecified site	-0.00020951	0.14253	0.3416	0.0849	genotyped
rs10741006	22856019	C	B35-B49 Mycoses	-0.00026164	0.12663	0.412258	0.3051	0.987636
rs11978267	50466304	A	B35-B49 Mycoses	-9.8916e-05	0.59856	0.2752	0.9387	genotyped
rs12769953	22407656	C	B35-B49 Mycoses	-0.00022819	0.25605	0.225586	0.2288	0.992394
rs2239633	23589057	G	B35-B49 Mycoses	7.0513e-05	0.67446	0.4838	0.09197	genotyped
rs2290400	38066240	C	B35-B49 Mycoses	-0.00025991	0.12163	0.4891	0.1986	genotyped
rs2390536	21485397	A	B35-B49 Mycoses	0.0001302	0.45601	0.363622	0.315	0.993467
rs3731249	21970916	C	B35-B49 Mycoses	-0.00048467	0.34927	0.02696	0.473	genotyped
rs3740540	126294167	G	B35-B49 Mycoses	-0.00012865	0.49637	0.2686	0.6892	genotyped
rs3824662	8104208	A	B35-B49 Mycoses	-0.00016773	0.45261	0.171996	0.2615	0.988987
rs4617118	130156143	G	B35-B49 Mycoses	-0.0001852	0.40301	0.174868	0.6895	0.989614
rs4762284	96612762	T	B35-B49 Mycoses	0.00022894	0.21299	0.295513	0.7244	0.997309
rs7089424	63752159	T	B35-B49 Mycoses	-8.8435e-05	0.6172	0.3416	0.0849	genotyped
rs10741006	22856019	C	B37 Candidiasis	-0.00029412	0.056239	0.412258	0.3051	0.987636
rs11978267	50466304	A	B37 Candidiasis	-6.0109e-05	0.72213	0.2752	0.9387	genotyped
rs12769953	22407656	C	B37 Candidiasis	-0.00018731	0.29995	0.225586	0.2288	0.992394
rs2239633	23589057	G	B37 Candidiasis	-5.6293e-05	0.70923	0.4838	0.09197	genotyped
rs2290400	38066240	C	B37 Candidiasis	-0.00016221	0.28275	0.4891	0.1986	genotyped
rs2390536	21485397	A	B37 Candidiasis	0.00014007	0.37272	0.363622	0.315	0.993467
rs3731249	21970916	C	B37 Candidiasis	-0.0006055	0.19353	0.02696	0.473	genotyped
rs3740540	126294167	G	B37 Candidiasis	-8.3022e-05	0.62553	0.2686	0.6892	genotyped
rs3824662	8104208	A	B37 Candidiasis	-0.00017235	0.39087	0.171996	0.2615	0.988987
rs4617118	130156143	G	B37 Candidiasis	-0.00024342	0.22168	0.174868	0.6895	0.989614
rs4762284	96612762	T	B37 Candidiasis	0.00025119	0.12869	0.295513	0.7244	0.997309
rs7089424	63752159	T	B37 Candidiasis	-0.00011337	0.47624	0.3416	0.0849	genotyped
rs10741006	22856019	C	B95 Streptococcus and staphylococcus as the cause of diseases classified to other chapters	-0.00035118	0.096333	0.412258	0.3051	0.987636
rs11978267	50466304	A	B95 Streptococcus and staphylococcus as the cause of diseases classified to other chapters	7.0675e-05	0.76024	0.2752	0.9387	genotyped
rs12769953	22407656	C	B95 Streptococcus and staphylococcus as the cause of diseases classified to other chapters	-0.00017612	0.47711	0.225586	0.2288	0.992394
rs2239633	23589057	G	B95 Streptococcus and staphylococcus as the cause of diseases classified to other chapters	5e-05	0.80903	0.4838	0.09197	genotyped
rs2290400	38066240	C	B95 Streptococcus and staphylococcus as the cause of diseases classified to other chapters	-0.00018047	0.38329	0.4891	0.1986	genotyped
rs2390536	21485397	A	B95 Streptococcus and staphylococcus as the cause of diseases classified to other chapters	7.2287e-05	0.73706	0.363622	0.315	0.993467
rs3731249	21970916	C	B95 Streptococcus and staphylococcus as the cause of diseases classified to other chapters	-0.00060136	0.34625	0.02696	0.473	genotyped
rs3740540	126294167	G	B95 Streptococcus and staphylococcus as the cause of diseases classified to other chapters	0.0002071	0.3745	0.2686	0.6892	genotyped
rs3824662	8104208	A	B95 Streptococcus and staphylococcus as the cause of diseases classified to other chapters	0.00017116	0.5342	0.171996	0.2615	0.988987
rs4617118	130156143	G	B95 Streptococcus and staphylococcus as the cause of diseases classified to other chapters	-0.00018898	0.48879	0.174868	0.6895	0.989614
rs4762284	96612762	T	B95 Streptococcus and staphylococcus as the cause of diseases classified to other chapters	-0.00019385	0.39235	0.295513	0.7244	0.997309
rs7089424	63752159	T	B95 Streptococcus and staphylococcus as the cause of diseases classified to other chapters	-0.00023856	0.27415	0.3416	0.0849	genotyped
rs10741006	22856019	C	B95-B98 Bacterial, viral and other infectious agents	-0.00039343	0.29142	0.412258	0.3051	0.987636
rs11978267	50466304	A	B95-B98 Bacterial, viral and other infectious agents	0.00044446	0.27695	0.2752	0.9387	genotyped
rs12769953	22407656	C	B95-B98 Bacterial, viral and other infectious agents	-0.00018888	0.66589	0.225586	0.2288	0.992394
rs2239633	23589057	G	B95-B98 Bacterial, viral and other infectious agents	0.00044593	0.22213	0.4838	0.09197	genotyped
rs2290400	38066240	C	B95-B98 Bacterial, viral and other infectious agents	-0.0004265	0.24303	0.4891	0.1986	genotyped
rs2390536	21485397	A	B95-B98 Bacterial, viral and other infectious agents	1.8512e-05	0.96115	0.363622	0.315	0.993467
rs3731249	21970916	C	B95-B98 Bacterial, viral and other infectious agents	-0.0008493	0.45111	0.02696	0.473	genotyped
rs3740540	126294167	G	B95-B98 Bacterial, viral and other infectious agents	-9.0572e-05	0.82591	0.2686	0.6892	genotyped
rs3824662	8104208	A	B95-B98 Bacterial, viral and other infectious agents	0.00016197	0.73904	0.171996	0.2615	0.988987
rs4617118	130156143	G	B95-B98 Bacterial, viral and other infectious agents	2.7029e-05	0.95528	0.174868	0.6895	0.989614
rs4762284	96612762	T	B95-B98 Bacterial, viral and other infectious agents	-3.4984e-05	0.93031	0.295513	0.7244	0.997309
rs7089424	63752159	T	B95-B98 Bacterial, viral and other infectious agents	-0.00055065	0.15287	0.3416	0.0849	genotyped
rs10741006	22856019	C	B96 Other bacterial agents as the cause of diseases classified to other chapters	-1.5774e-05	0.95911	0.412258	0.3051	0.987636
rs11978267	50466304	A	B96 Other bacterial agents as the cause of diseases classified to other chapters	0.00014019	0.67758	0.2752	0.9387	genotyped
rs12769953	22407656	C	B96 Other bacterial agents as the cause of diseases classified to other chapters	-4.4155e-05	0.90263	0.225586	0.2288	0.992394
rs2239633	23589057	G	B96 Other bacterial agents as the cause of diseases classified to other chapters	0.00036789	0.22208	0.4838	0.09197	genotyped
rs2290400	38066240	C	B96 Other bacterial agents as the cause of diseases classified to other chapters	-0.00047863	0.1123	0.4891	0.1986	genotyped
rs2390536	21485397	A	B96 Other bacterial agents as the cause of diseases classified to other chapters	-0.00011142	0.72227	0.363622	0.315	0.993467
rs3731249	21970916	C	B96 Other bacterial agents as the cause of diseases classified to other chapters	-0.00030988	0.7389	0.02696	0.473	genotyped
rs3740540	126294167	G	B96 Other bacterial agents as the cause of diseases classified to other chapters	-0.00015376	0.65087	0.2686	0.6892	genotyped
rs3824662	8104208	A	B96 Other bacterial agents as the cause of diseases classified to other chapters	7.2547e-05	0.85649	0.171996	0.2615	0.988987
rs4617118	130156143	G	B96 Other bacterial agents as the cause of diseases classified to other chapters	0.00040817	0.30464	0.174868	0.6895	0.989614
rs4762284	96612762	T	B96 Other bacterial agents as the cause of diseases classified to other chapters	0.00024728	0.4537	0.295513	0.7244	0.997309
rs7089424	63752159	T	B96 Other bacterial agents as the cause of diseases classified to other chapters	-0.00039718	0.21143	0.3416	0.0849	genotyped
rs10741006	22856019	C	B97 Viral agents as the cause of diseases classified to other chapters	0.00010321	0.18195	0.412258	0.3051	0.987636
rs11978267	50466304	A	B97 Viral agents as the cause of diseases classified to other chapters	2.1695e-05	0.79808	0.2752	0.9387	genotyped
rs12769953	22407656	C	B97 Viral agents as the cause of diseases classified to other chapters	5.0841e-05	0.57509	0.225586	0.2288	0.992394
rs2239633	23589057	G	B97 Viral agents as the cause of diseases classified to other chapters	8.3412e-05	0.27089	0.4838	0.09197	genotyped
rs2290400	38066240	C	B97 Viral agents as the cause of diseases classified to other chapters	0.0001718	0.023402	0.4891	0.1986	genotyped
rs2390536	21485397	A	B97 Viral agents as the cause of diseases classified to other chapters	2.353e-05	0.76535	0.363622	0.315	0.993467
rs3731249	21970916	C	B97 Viral agents as the cause of diseases classified to other chapters	0.00019739	0.39833	0.02696	0.473	genotyped
rs3740540	126294167	G	B97 Viral agents as the cause of diseases classified to other chapters	3.4992e-05	0.68193	0.2686	0.6892	genotyped
rs3824662	8104208	A	B97 Viral agents as the cause of diseases classified to other chapters	-5.1787e-05	0.60746	0.171996	0.2615	0.988987
rs4617118	130156143	G	B97 Viral agents as the cause of diseases classified to other chapters	-2.708e-05	0.7865	0.174868	0.6895	0.989614
rs4762284	96612762	T	B97 Viral agents as the cause of diseases classified to other chapters	4.4131e-05	0.59482	0.295513	0.7244	0.997309
rs7089424	63752159	T	B97 Viral agents as the cause of diseases classified to other chapters	-0.00010709	0.18	0.3416	0.0849	genotyped
rs10741006	22856019	C	B98 Other specified infectious agents as the cause of diseases classified to other chapters	-0.00010739	0.26653	0.412258	0.3051	0.987636
rs11978267	50466304	A	B98 Other specified infectious agents as the cause of diseases classified to other chapters	0.00015269	0.1496	0.2752	0.9387	genotyped
rs12769953	22407656	C	B98 Other specified infectious agents as the cause of diseases classified to other chapters	-3.1078e-05	0.78398	0.225586	0.2288	0.992394
rs2239633	23589057	G	B98 Other specified infectious agents as the cause of diseases classified to other chapters	-0.00010967	0.24674	0.4838	0.09197	genotyped
rs2290400	38066240	C	B98 Other specified infectious agents as the cause of diseases classified to other chapters	2.23e-05	0.81384	0.4891	0.1986	genotyped
rs2390536	21485397	A	B98 Other specified infectious agents as the cause of diseases classified to other chapters	-3.497e-05	0.72261	0.363622	0.315	0.993467
rs3731249	21970916	C	B98 Other specified infectious agents as the cause of diseases classified to other chapters	-0.00018836	0.51888	0.02696	0.473	genotyped
rs3740540	126294167	G	B98 Other specified infectious agents as the cause of diseases classified to other chapters	-4.0164e-06	0.96998	0.2686	0.6892	genotyped
rs3824662	8104208	A	B98 Other specified infectious agents as the cause of diseases classified to other chapters	-0.00010585	0.40093	0.171996	0.2615	0.988987
rs4617118	130156143	G	B98 Other specified infectious agents as the cause of diseases classified to other chapters	-7.6651e-05	0.53948	0.174868	0.6895	0.989614
rs4762284	96612762	T	B98 Other specified infectious agents as the cause of diseases classified to other chapters	-4.7377e-05	0.64766	0.295513	0.7244	0.997309
rs7089424	63752159	T	B98 Other specified infectious agents as the cause of diseases classified to other chapters	0.0001797	0.071884	0.3416	0.0849	genotyped
rs10741006	22856019	C	back pain	8.8749e-05	0.56766	0.412258	0.3051	0.987636
rs11978267	50466304	A	back pain	9.5189e-05	0.57614	0.2752	0.9387	genotyped
rs12769953	22407656	C	back pain	-8.2438e-05	0.65085	0.225586	0.2288	0.992394
rs2239633	23589057	G	back pain	0.00013214	0.38519	0.4838	0.09197	genotyped
rs2290400	38066240	C	back pain	-1.3771e-05	0.92793	0.4891	0.1986	genotyped
rs2390536	21485397	A	back pain	9.3236e-05	0.55587	0.363622	0.315	0.993467
rs3731249	21970916	C	back pain	0.00018951	0.68642	0.02696	0.473	genotyped
rs3740540	126294167	G	back pain	-0.0002333	0.17365	0.2686	0.6892	genotyped
rs3824662	8104208	A	back pain	0.00021372	0.29115	0.171996	0.2615	0.988987
rs4617118	130156143	G	back pain	-0.00039398	0.049796	0.174868	0.6895	0.989614
rs4762284	96612762	T	back pain	-0.00012387	0.4575	0.295513	0.7244	0.997309
rs7089424	63752159	T	back pain	7.3411e-05	0.64721	0.3416	0.0849	genotyped
rs10741006	22856019	C	back problem	-0.00068546	0.16953	0.412258	0.3051	0.987636
rs11978267	50466304	A	back problem	-0.00033014	0.54611	0.2752	0.9387	genotyped
rs12769953	22407656	C	back problem	-0.00015201	0.79509	0.225586	0.2288	0.992394
rs2239633	23589057	G	back problem	0.00090738	0.063199	0.4838	0.09197	genotyped
rs2290400	38066240	C	back problem	-0.00025138	0.60688	0.4891	0.1986	genotyped
rs2390536	21485397	A	back problem	-6.3454e-05	0.90069	0.363622	0.315	0.993467
rs3731249	21970916	C	back problem	0.0011016	0.46489	0.02696	0.473	genotyped
rs3740540	126294167	G	back problem	-0.0010093	0.066998	0.2686	0.6892	genotyped
rs3824662	8104208	A	back problem	0.00043847	0.50033	0.171996	0.2615	0.988987
rs4617118	130156143	G	back problem	-0.00038031	0.55529	0.174868	0.6895	0.989614
rs4762284	96612762	T	back problem	0.00036115	0.49978	0.295513	0.7244	0.997309
rs7089424	63752159	T	back problem	-0.00098789	0.055294	0.3416	0.0849	genotyped
rs10741006	22856019	C	bacterial infection	2.9164e-06	0.98911	0.412258	0.3051	0.987636
rs11978267	50466304	A	bacterial infection	7.0451e-05	0.76367	0.2752	0.9387	genotyped
rs12769953	22407656	C	bacterial infection	-0.00040444	0.10659	0.225586	0.2288	0.992394
rs2239633	23589057	G	bacterial infection	0.00023099	0.26991	0.4838	0.09197	genotyped
rs2290400	38066240	C	bacterial infection	7.0045e-05	0.73817	0.4891	0.1986	genotyped
rs2390536	21485397	A	bacterial infection	-0.00010322	0.63562	0.363622	0.315	0.993467
rs3731249	21970916	C	bacterial infection	-0.001022	0.11366	0.02696	0.473	genotyped
rs3740540	126294167	G	bacterial infection	9.2678e-06	0.96867	0.2686	0.6892	genotyped
rs3824662	8104208	A	bacterial infection	-0.0001129	0.68528	0.171996	0.2615	0.988987
rs4617118	130156143	G	bacterial infection	0.00024147	0.38222	0.174868	0.6895	0.989614
rs4762284	96612762	T	bacterial infection	-0.00028587	0.21262	0.295513	0.7244	0.997309
rs7089424	63752159	T	bacterial infection	-0.00018016	0.41436	0.3416	0.0849	genotyped
rs10741006	22856019	C	Basal metabolic rate	-8.3437	1.4317e-09	0.412258	0.3051	0.987636
rs11978267	50466304	A	Basal metabolic rate	-8.094	9.2171e-08	0.2752	0.9387	genotyped
rs12769953	22407656	C	Basal metabolic rate	5.3533	0.00093229	0.225586	0.2288	0.992394
rs2239633	23589057	G	Basal metabolic rate	2.0974	0.11934	0.4838	0.09197	genotyped
rs2290400	38066240	C	Basal metabolic rate	1.1981	0.37464	0.4891	0.1986	genotyped
rs2390536	21485397	A	Basal metabolic rate	-1.8409	0.1913	0.363622	0.315	0.993467
rs3731249	21970916	C	Basal metabolic rate	-1.9045	0.64746	0.02696	0.473	genotyped
rs3740540	126294167	G	Basal metabolic rate	-5.5093	0.000296	0.2686	0.6892	genotyped
rs3824662	8104208	A	Basal metabolic rate	1.6529	0.35782	0.171996	0.2615	0.988987
rs4617118	130156143	G	Basal metabolic rate	2.5331	0.15561	0.174868	0.6895	0.989614
rs4762284	96612762	T	Basal metabolic rate	2.4635	0.097055	0.295513	0.7244	0.997309
rs7089424	63752159	T	Basal metabolic rate	-2.6572	0.062076	0.3416	0.0849	genotyped
rs10741006	22856019	C	Basophill count	4.2397e-05	0.59659	0.412258	0.3051	0.987636
rs11978267	50466304	A	Basophill count	0.00022912	0.0091512	0.2752	0.9387	genotyped
rs12769953	22407656	C	Basophill count	-0.00013092	0.16346	0.225586	0.2288	0.992394
rs2239633	23589057	G	Basophill count	-0.00046288	3.4719e-09	0.4838	0.09197	genotyped
rs2290400	38066240	C	Basophill count	-0.00076647	1.6393e-22	0.4891	0.1986	genotyped
rs2390536	21485397	A	Basophill count	-5.1293e-05	0.53024	0.363622	0.315	0.993467
rs3731249	21970916	C	Basophill count	0.0006367	0.0084662	0.02696	0.473	genotyped
rs3740540	126294167	G	Basophill count	0.00048996	3.0307e-08	0.2686	0.6892	genotyped
rs3824662	8104208	A	Basophill count	3.3381e-05	0.74923	0.171996	0.2615	0.988987
rs4617118	130156143	G	Basophill count	-0.0001224	0.23772	0.174868	0.6895	0.989614
rs4762284	96612762	T	Basophill count	0.00014765	0.085606	0.295513	0.7244	0.997309
rs7089424	63752159	T	Basophill count	-6.9807e-07	0.99327	0.3416	0.0849	genotyped
rs10741006	22856019	C	Basophill percentage	0.00026827	0.76341	0.412258	0.3051	0.987636
rs11978267	50466304	A	Basophill percentage	0.0031987	0.0010717	0.2752	0.9387	genotyped
rs12769953	22407656	C	Basophill percentage	2.9261e-06	0.99777	0.225586	0.2288	0.992394
rs2239633	23589057	G	Basophill percentage	-0.0063093	4.6306e-13	0.4838	0.09197	genotyped
rs2290400	38066240	C	Basophill percentage	-0.0036471	2.9231e-05	0.4891	0.1986	genotyped
rs2390536	21485397	A	Basophill percentage	-0.00078909	0.38541	0.363622	0.315	0.993467
rs3731249	21970916	C	Basophill percentage	0.006421	0.016985	0.02696	0.473	genotyped
rs3740540	126294167	G	Basophill percentage	0.0052767	8.2457e-08	0.2686	0.6892	genotyped
rs3824662	8104208	A	Basophill percentage	0.0012925	0.26603	0.171996	0.2615	0.988987
rs4617118	130156143	G	Basophill percentage	-0.0023854	0.038696	0.174868	0.6895	0.989614
rs4762284	96612762	T	Basophill percentage	0.00036707	0.70087	0.295513	0.7244	0.997309
rs7089424	63752159	T	Basophill percentage	3.8379e-05	0.96675	0.3416	0.0849	genotyped
rs10741006	22856019	C	Beef intake	0.00066013	0.69379	0.412258	0.3051	0.987636
rs11978267	50466304	A	Beef intake	0.0021778	0.23614	0.2752	0.9387	genotyped
rs12769953	22407656	C	Beef intake	-0.002241	0.25451	0.225586	0.2288	0.992394
rs2239633	23589057	G	Beef intake	0.0017402	0.28934	0.4838	0.09197	genotyped
rs2290400	38066240	C	Beef intake	0.0059532	0.0002882	0.4891	0.1986	genotyped
rs2390536	21485397	A	Beef intake	0.00018248	0.91497	0.363622	0.315	0.993467
rs3731249	21970916	C	Beef intake	-0.001858	0.71393	0.02696	0.473	genotyped
rs3740540	126294167	G	Beef intake	-0.00060226	0.74496	0.2686	0.6892	genotyped
rs3824662	8104208	A	Beef intake	0.0023882	0.27463	0.171996	0.2615	0.988987
rs4617118	130156143	G	Beef intake	-0.0022977	0.28916	0.174868	0.6895	0.989614
rs4762284	96612762	T	Beef intake	0.00049324	0.78395	0.295513	0.7244	0.997309
rs7089424	63752159	T	Beef intake	-0.001829	0.29097	0.3416	0.0849	genotyped
rs10741006	22856019	C	benign breast lump	-0.00015389	0.46178	0.412258	0.3051	0.987636
rs11978267	50466304	A	benign breast lump	-0.00020777	0.36449	0.2752	0.9387	genotyped
rs12769953	22407656	C	benign breast lump	-5.1321e-05	0.83397	0.225586	0.2288	0.992394
rs2239633	23589057	G	benign breast lump	-0.00018989	0.35266	0.4838	0.09197	genotyped
rs2290400	38066240	C	benign breast lump	-0.00022433	0.2728	0.4891	0.1986	genotyped
rs2390536	21485397	A	benign breast lump	-0.00013118	0.53751	0.363622	0.315	0.993467
rs3731249	21970916	C	benign breast lump	0.0004273	0.49956	0.02696	0.473	genotyped
rs3740540	126294167	G	benign breast lump	-1.1303e-05	0.96093	0.2686	0.6892	genotyped
rs3824662	8104208	A	benign breast lump	-0.00013122	0.63029	0.171996	0.2615	0.988987
rs4617118	130156143	G	benign breast lump	8.5341e-05	0.75167	0.174868	0.6895	0.989614
rs4762284	96612762	T	benign breast lump	-0.0002182	0.33008	0.295513	0.7244	0.997309
rs7089424	63752159	T	benign breast lump	7.8917e-05	0.71415	0.3416	0.0849	genotyped
rs10741006	22856019	C	bladder problem (not cancer)	-2.6945e-05	0.89615	0.412258	0.3051	0.987636
rs11978267	50466304	A	bladder problem (not cancer)	0.00020397	0.36769	0.2752	0.9387	genotyped
rs12769953	22407656	C	bladder problem (not cancer)	-6.7468e-05	0.78054	0.225586	0.2288	0.992394
rs2239633	23589057	G	bladder problem (not cancer)	0.00026902	0.18365	0.4838	0.09197	genotyped
rs2290400	38066240	C	bladder problem (not cancer)	-8.6987e-05	0.66737	0.4891	0.1986	genotyped
rs2390536	21485397	A	bladder problem (not cancer)	-6.5795e-06	0.97507	0.363622	0.315	0.993467
rs3731249	21970916	C	bladder problem (not cancer)	-0.00012875	0.83654	0.02696	0.473	genotyped
rs3740540	126294167	G	bladder problem (not cancer)	6.8803e-05	0.76279	0.2686	0.6892	genotyped
rs3824662	8104208	A	bladder problem (not cancer)	0.0003325	0.2167	0.171996	0.2615	0.988987
rs4617118	130156143	G	bladder problem (not cancer)	0.00034834	0.192	0.174868	0.6895	0.989614
rs4762284	96612762	T	bladder problem (not cancer)	-0.0002438	0.27123	0.295513	0.7244	0.997309
rs7089424	63752159	T	bladder problem (not cancer)	-0.0002293	0.28226	0.3416	0.0849	genotyped
rs10741006	22856019	C	blistering/desquamating skin disorder	-0.00010321	0.25872	0.412258	0.3051	0.987636
rs11978267	50466304	A	blistering/desquamating skin disorder	-6.9616e-05	0.48725	0.2752	0.9387	genotyped
rs12769953	22407656	C	blistering/desquamating skin disorder	4.658e-05	0.6639	0.225586	0.2288	0.992394
rs2239633	23589057	G	blistering/desquamating skin disorder	-0.00012841	0.15156	0.4838	0.09197	genotyped
rs2290400	38066240	C	blistering/desquamating skin disorder	-0.00012684	0.15681	0.4891	0.1986	genotyped
rs2390536	21485397	A	blistering/desquamating skin disorder	6.247e-05	0.50252	0.363622	0.315	0.993467
rs3731249	21970916	C	blistering/desquamating skin disorder	-0.00060674	0.028058	0.02696	0.473	genotyped
rs3740540	126294167	G	blistering/desquamating skin disorder	4.681e-05	0.64275	0.2686	0.6892	genotyped
rs3824662	8104208	A	blistering/desquamating skin disorder	-0.00021628	0.069496	0.171996	0.2615	0.988987
rs4617118	130156143	G	blistering/desquamating skin disorder	0.00011139	0.34585	0.174868	0.6895	0.989614
rs4762284	96612762	T	blistering/desquamating skin disorder	4.8838e-05	0.61848	0.295513	0.7244	0.997309
rs7089424	63752159	T	blistering/desquamating skin disorder	2.8067e-05	0.76622	0.3416	0.0849	genotyped
rs10741006	22856019	C	Body fat percentage	-0.033049	0.0025581	0.412258	0.3051	0.987636
rs11978267	50466304	A	Body fat percentage	-0.049968	3.243e-05	0.2752	0.9387	genotyped
rs12769953	22407656	C	Body fat percentage	0.026569	0.038704	0.225586	0.2288	0.992394
rs2239633	23589057	G	Body fat percentage	0.012433	0.24536	0.4838	0.09197	genotyped
rs2290400	38066240	C	Body fat percentage	0.0031058	0.77175	0.4891	0.1986	genotyped
rs2390536	21485397	A	Body fat percentage	-0.02327	0.037368	0.363622	0.315	0.993467
rs3731249	21970916	C	Body fat percentage	0.033128	0.31677	0.02696	0.473	genotyped
rs3740540	126294167	G	Body fat percentage	-0.058293	1.4485e-06	0.2686	0.6892	genotyped
rs3824662	8104208	A	Body fat percentage	0.0019955	0.8889	0.171996	0.2615	0.988987
rs4617118	130156143	G	Body fat percentage	0.00049758	0.97198	0.174868	0.6895	0.989614
rs4762284	96612762	T	Body fat percentage	0.0037449	0.75024	0.295513	0.7244	0.997309
rs7089424	63752159	T	Body fat percentage	-0.0091206	0.42033	0.3416	0.0849	genotyped
rs10741006	22856019	C	Body mass index (BMI)	-0.034018	2.97e-05	0.412258	0.3051	0.987636
rs10741006	22856019	C	Body mass index (BMI)	-0.031511	0.00012378	0.412258	0.3051	0.987636
rs11978267	50466304	A	Body mass index (BMI)	-0.036281	4.9779e-05	0.2752	0.9387	genotyped
rs11978267	50466304	A	Body mass index (BMI)	-0.03578	7.1782e-05	0.2752	0.9387	genotyped
rs12769953	22407656	C	Body mass index (BMI)	0.028534	0.0028258	0.225586	0.2288	0.992394
rs12769953	22407656	C	Body mass index (BMI)	0.02833	0.00326	0.225586	0.2288	0.992394
rs2239633	23589057	G	Body mass index (BMI)	0.0061706	0.43817	0.4838	0.09197	genotyped
rs2239633	23589057	G	Body mass index (BMI)	0.0057641	0.47227	0.4838	0.09197	genotyped
rs2290400	38066240	C	Body mass index (BMI)	0.013886	0.081144	0.4891	0.1986	genotyped
rs2290400	38066240	C	Body mass index (BMI)	0.013801	0.085332	0.4891	0.1986	genotyped
rs2390536	21485397	A	Body mass index (BMI)	-0.018611	0.026324	0.363622	0.315	0.993467
rs2390536	21485397	A	Body mass index (BMI)	-0.018184	0.028739	0.363622	0.315	0.993467
rs3731249	21970916	C	Body mass index (BMI)	0.022999	0.35382	0.02696	0.473	genotyped
rs3731249	21970916	C	Body mass index (BMI)	0.020653	0.40143	0.02696	0.473	genotyped
rs3740540	126294167	G	Body mass index (BMI)	-0.0083721	0.3557	0.2686	0.6892	genotyped
rs3740540	126294167	G	Body mass index (BMI)	-0.0072169	0.42241	0.2686	0.6892	genotyped
rs3824662	8104208	A	Body mass index (BMI)	0.017508	0.099287	0.171996	0.2615	0.988987
rs3824662	8104208	A	Body mass index (BMI)	0.017497	0.10209	0.171996	0.2615	0.988987
rs4617118	130156143	G	Body mass index (BMI)	-0.0015024	0.88741	0.174868	0.6895	0.989614
rs4617118	130156143	G	Body mass index (BMI)	-0.0013222	0.90008	0.174868	0.6895	0.989614
rs4762284	96612762	T	Body mass index (BMI)	0.0067156	0.4424	0.295513	0.7244	0.997309
rs4762284	96612762	T	Body mass index (BMI)	0.0062098	0.48094	0.295513	0.7244	0.997309
rs7089424	63752159	T	Body mass index (BMI)	0.013828	0.10035	0.3416	0.0849	genotyped
rs7089424	63752159	T	Body mass index (BMI)	0.012664	0.13535	0.3416	0.0849	genotyped
rs10741006	22856019	C	bone disorder	0.00056751	0.067742	0.412258	0.3051	0.987636
rs11978267	50466304	A	bone disorder	0.0001701	0.61779	0.2752	0.9387	genotyped
rs12769953	22407656	C	bone disorder	0.00018884	0.60431	0.225586	0.2288	0.992394
rs2239633	23589057	G	bone disorder	0.0001898	0.53287	0.4838	0.09197	genotyped
rs2290400	38066240	C	bone disorder	-7.3406e-05	0.80954	0.4891	0.1986	genotyped
rs2390536	21485397	A	bone disorder	-0.00069861	0.027499	0.363622	0.315	0.993467
rs3731249	21970916	C	bone disorder	0.00020906	0.82382	0.02696	0.473	genotyped
rs3740540	126294167	G	bone disorder	-0.00027268	0.4267	0.2686	0.6892	genotyped
rs3824662	8104208	A	bone disorder	0.00017335	0.66867	0.171996	0.2615	0.988987
rs4617118	130156143	G	bone disorder	-9.1847e-05	0.81911	0.174868	0.6895	0.989614
rs4762284	96612762	T	bone disorder	0.00053625	0.10789	0.295513	0.7244	0.997309
rs7089424	63752159	T	bone disorder	-0.00041244	0.19874	0.3416	0.0849	genotyped
rs10741006	22856019	C	bowel problem	0.00021839	0.67802	0.412258	0.3051	0.987636
rs11978267	50466304	A	bowel problem	-0.00037424	0.51662	0.2752	0.9387	genotyped
rs12769953	22407656	C	bowel problem	-1.0806e-05	0.98603	0.225586	0.2288	0.992394
rs2239633	23589057	G	bowel problem	0.00063818	0.2156	0.4838	0.09197	genotyped
rs2290400	38066240	C	bowel problem	-0.00028821	0.57626	0.4891	0.1986	genotyped
rs2390536	21485397	A	bowel problem	-0.00080883	0.13162	0.363622	0.315	0.993467
rs3731249	21970916	C	bowel problem	-0.0010131	0.52405	0.02696	0.473	genotyped
rs3740540	126294167	G	bowel problem	0.0001937	0.73879	0.2686	0.6892	genotyped
rs3824662	8104208	A	bowel problem	-0.0006011	0.38079	0.171996	0.2615	0.988987
rs4617118	130156143	G	bowel problem	-0.00017507	0.79694	0.174868	0.6895	0.989614
rs4762284	96612762	T	bowel problem	0.00033392	0.55416	0.295513	0.7244	0.997309
rs7089424	63752159	T	bowel problem	0.00023409	0.66662	0.3416	0.0849	genotyped
rs10741006	22856019	C	Bread intake	0.03843	0.020356	0.412258	0.3051	0.987636
rs11978267	50466304	A	Bread intake	-0.0081021	0.65565	0.2752	0.9387	genotyped
rs12769953	22407656	C	Bread intake	0.0083064	0.66905	0.225586	0.2288	0.992394
rs2239633	23589057	G	Bread intake	-0.0025395	0.87561	0.4838	0.09197	genotyped
rs2290400	38066240	C	Bread intake	0.023923	0.14021	0.4891	0.1986	genotyped
rs2390536	21485397	A	Bread intake	-0.00062977	0.97026	0.363622	0.315	0.993467
rs3731249	21970916	C	Bread intake	-0.066444	0.18431	0.02696	0.473	genotyped
rs3740540	126294167	G	Bread intake	0.011507	0.52935	0.2686	0.6892	genotyped
rs3824662	8104208	A	Bread intake	-0.00059326	0.97809	0.171996	0.2615	0.988987
rs4617118	130156143	G	Bread intake	0.040187	0.060482	0.174868	0.6895	0.989614
rs4762284	96612762	T	Bread intake	-0.03137	0.077669	0.295513	0.7244	0.997309
rs7089424	63752159	T	Bread intake	0.0028065	0.86974	0.3416	0.0849	genotyped
rs10741006	22856019	C	breast cysts	8.2449e-05	0.73558	0.412258	0.3051	0.987636
rs11978267	50466304	A	breast cysts	-0.00027296	0.30786	0.2752	0.9387	genotyped
rs12769953	22407656	C	breast cysts	0.00012793	0.65446	0.225586	0.2288	0.992394
rs2239633	23589057	G	breast cysts	3.9063e-05	0.87007	0.4838	0.09197	genotyped
rs2290400	38066240	C	breast cysts	0.00045896	0.054806	0.4891	0.1986	genotyped
rs2390536	21485397	A	breast cysts	1.0171e-05	0.96736	0.363622	0.315	0.993467
rs3731249	21970916	C	breast cysts	0.00024267	0.74262	0.02696	0.473	genotyped
rs3740540	126294167	G	breast cysts	-0.00010231	0.70413	0.2686	0.6892	genotyped
rs3824662	8104208	A	breast cysts	-0.00046305	0.14572	0.171996	0.2615	0.988987
rs4617118	130156143	G	breast cysts	0.00047835	0.12902	0.174868	0.6895	0.989614
rs4762284	96612762	T	breast cysts	0.00020642	0.43016	0.295513	0.7244	0.997309
rs7089424	63752159	T	breast cysts	0.0001623	0.51876	0.3416	0.0849	genotyped
rs10741006	22856019	C	breast disease (not cancer)	1.1308e-05	0.97378	0.412258	0.3051	0.987636
rs11978267	50466304	A	breast disease (not cancer)	-0.00038145	0.31199	0.2752	0.9387	genotyped
rs12769953	22407656	C	breast disease (not cancer)	0.00017957	0.65574	0.225586	0.2288	0.992394
rs2239633	23589057	G	breast disease (not cancer)	-6.5155e-05	0.84643	0.4838	0.09197	genotyped
rs2290400	38066240	C	breast disease (not cancer)	0.00025691	0.4454	0.4891	0.1986	genotyped
rs2390536	21485397	A	breast disease (not cancer)	-0.00011052	0.7524	0.363622	0.315	0.993467
rs3731249	21970916	C	breast disease (not cancer)	-5.9441e-05	0.95447	0.02696	0.473	genotyped
rs3740540	126294167	G	breast disease (not cancer)	6.1245e-05	0.87184	0.2686	0.6892	genotyped
rs3824662	8104208	A	breast disease (not cancer)	-0.00030112	0.50199	0.171996	0.2615	0.988987
rs4617118	130156143	G	breast disease (not cancer)	0.00078679	0.076258	0.174868	0.6895	0.989614
rs4762284	96612762	T	breast disease (not cancer)	2.4993e-05	0.94594	0.295513	0.7244	0.997309
rs7089424	63752159	T	breast disease (not cancer)	0.00033578	0.34347	0.3416	0.0849	genotyped
rs10741006	22856019	C	bronchiectasis	-6.1433e-05	0.55168	0.412258	0.3051	0.987636
rs11978267	50466304	A	bronchiectasis	-0.00033907	0.0027351	0.2752	0.9387	genotyped
rs12769953	22407656	C	bronchiectasis	-4.1182e-05	0.73372	0.225586	0.2288	0.992394
rs2239633	23589057	G	bronchiectasis	-1.6379e-05	0.87134	0.4838	0.09197	genotyped
rs2290400	38066240	C	bronchiectasis	1.9523e-05	0.84698	0.4891	0.1986	genotyped
rs2390536	21485397	A	bronchiectasis	-5.343e-05	0.61157	0.363622	0.315	0.993467
rs3731249	21970916	C	bronchiectasis	2.8842e-05	0.92635	0.02696	0.473	genotyped
rs3740540	126294167	G	bronchiectasis	0.00023251	0.041327	0.2686	0.6892	genotyped
rs3824662	8104208	A	bronchiectasis	-2.19e-05	0.87071	0.171996	0.2615	0.988987
rs4617118	130156143	G	bronchiectasis	-0.00010432	0.43427	0.174868	0.6895	0.989614
rs4762284	96612762	T	bronchiectasis	-0.0001131	0.30721	0.295513	0.7244	0.997309
rs7089424	63752159	T	bronchiectasis	-8.9346e-06	0.93321	0.3416	0.0849	genotyped
rs10741006	22856019	C	bronchitis	0.00012672	0.48918	0.412258	0.3051	0.987636
rs11978267	50466304	A	bronchitis	-3.2449e-05	0.87167	0.2752	0.9387	genotyped
rs12769953	22407656	C	bronchitis	0.00015648	0.46656	0.225586	0.2288	0.992394
rs2239633	23589057	G	bronchitis	0.00045273	0.011678	0.4838	0.09197	genotyped
rs2290400	38066240	C	bronchitis	-0.00090177	5.2156e-07	0.4891	0.1986	genotyped
rs2390536	21485397	A	bronchitis	9.8255e-06	0.95804	0.363622	0.315	0.993467
rs3731249	21970916	C	bronchitis	-0.0006839	0.21696	0.02696	0.473	genotyped
rs3740540	126294167	G	bronchitis	-0.00011014	0.58619	0.2686	0.6892	genotyped
rs3824662	8104208	A	bronchitis	0.00019782	0.40762	0.171996	0.2615	0.988987
rs4617118	130156143	G	bronchitis	0.00034406	0.14635	0.174868	0.6895	0.989614
rs4762284	96612762	T	bronchitis	4.2005e-06	0.98296	0.295513	0.7244	0.997309
rs7089424	63752159	T	bronchitis	-0.0001307	0.48987	0.3416	0.0849	genotyped
rs10741006	22856019	C	C00-C14 Malignant neoplasms of lip, oral cavity and pharynx	0.0001678	0.062029	0.412258	0.3051	0.987636
rs11978267	50466304	A	C00-C14 Malignant neoplasms of lip, oral cavity and pharynx	-7.8135e-06	0.93685	0.2752	0.9387	genotyped
rs12769953	22407656	C	C00-C14 Malignant neoplasms of lip, oral cavity and pharynx	-4.1861e-05	0.69146	0.225586	0.2288	0.992394
rs2239633	23589057	G	C00-C14 Malignant neoplasms of lip, oral cavity and pharynx	0.00013447	0.127	0.4838	0.09197	genotyped
rs2290400	38066240	C	C00-C14 Malignant neoplasms of lip, oral cavity and pharynx	-9.389e-05	0.28684	0.4891	0.1986	genotyped
rs2390536	21485397	A	C00-C14 Malignant neoplasms of lip, oral cavity and pharynx	4.2605e-05	0.64213	0.363622	0.315	0.993467
rs3731249	21970916	C	C00-C14 Malignant neoplasms of lip, oral cavity and pharynx	-0.00014661	0.58968	0.02696	0.473	genotyped
rs3740540	126294167	G	C00-C14 Malignant neoplasms of lip, oral cavity and pharynx	1.0963e-05	0.91209	0.2686	0.6892	genotyped
rs3824662	8104208	A	C00-C14 Malignant neoplasms of lip, oral cavity and pharynx	-0.00024903	0.033663	0.171996	0.2615	0.988987
rs4617118	130156143	G	C00-C14 Malignant neoplasms of lip, oral cavity and pharynx	-0.00011463	0.32426	0.174868	0.6895	0.989614
rs4762284	96612762	T	C00-C14 Malignant neoplasms of lip, oral cavity and pharynx	6.3438e-05	0.51098	0.295513	0.7244	0.997309
rs7089424	63752159	T	C00-C14 Malignant neoplasms of lip, oral cavity and pharynx	-0.00022629	0.014844	0.3416	0.0849	genotyped
rs10741006	22856019	C	C15-C26 Malignant neoplasms of digestive organs	-0.00048702	0.047864	0.412258	0.3051	0.987636
rs11978267	50466304	A	C15-C26 Malignant neoplasms of digestive organs	-0.00043737	0.10508	0.2752	0.9387	genotyped
rs12769953	22407656	C	C15-C26 Malignant neoplasms of digestive organs	-1.7201e-05	0.95249	0.225586	0.2288	0.992394
rs2239633	23589057	G	C15-C26 Malignant neoplasms of digestive organs	0.00015189	0.52876	0.4838	0.09197	genotyped
rs2290400	38066240	C	C15-C26 Malignant neoplasms of digestive organs	-0.0004514	0.061267	0.4891	0.1986	genotyped
rs2390536	21485397	A	C15-C26 Malignant neoplasms of digestive organs	-0.00018862	0.45216	0.363622	0.315	0.993467
rs3731249	21970916	C	C15-C26 Malignant neoplasms of digestive organs	0.0004271	0.56595	0.02696	0.473	genotyped
rs3740540	126294167	G	C15-C26 Malignant neoplasms of digestive organs	-3.2033e-05	0.90618	0.2686	0.6892	genotyped
rs3824662	8104208	A	C15-C26 Malignant neoplasms of digestive organs	0.000544	0.090056	0.171996	0.2615	0.988987
rs4617118	130156143	G	C15-C26 Malignant neoplasms of digestive organs	-0.00049686	0.11851	0.174868	0.6895	0.989614
rs4762284	96612762	T	C15-C26 Malignant neoplasms of digestive organs	-0.00027207	0.30284	0.295513	0.7244	0.997309
rs7089424	63752159	T	C15-C26 Malignant neoplasms of digestive organs	0.00045143	0.075832	0.3416	0.0849	genotyped
rs10741006	22856019	C	C18 Malignant neoplasm of colon	-5.6257e-05	0.72654	0.412258	0.3051	0.987636
rs11978267	50466304	A	C18 Malignant neoplasm of colon	-0.00016152	0.3597	0.2752	0.9387	genotyped
rs12769953	22407656	C	C18 Malignant neoplasm of colon	0.00010035	0.59482	0.225586	0.2288	0.992394
rs2239633	23589057	G	C18 Malignant neoplasm of colon	-6.2116e-05	0.6936	0.4838	0.09197	genotyped
rs2290400	38066240	C	C18 Malignant neoplasm of colon	-0.00043949	0.005316	0.4891	0.1986	genotyped
rs2390536	21485397	A	C18 Malignant neoplasm of colon	-0.00022217	0.17534	0.363622	0.315	0.993467
rs3731249	21970916	C	C18 Malignant neoplasm of colon	0.00043341	0.37272	0.02696	0.473	genotyped
rs3740540	126294167	G	C18 Malignant neoplasm of colon	7.2325e-05	0.68387	0.2686	0.6892	genotyped
rs3824662	8104208	A	C18 Malignant neoplasm of colon	0.0002405	0.25148	0.171996	0.2615	0.988987
rs4617118	130156143	G	C18 Malignant neoplasm of colon	-0.00018003	0.38676	0.174868	0.6895	0.989614
rs4762284	96612762	T	C18 Malignant neoplasm of colon	-0.00030999	0.072577	0.295513	0.7244	0.997309
rs7089424	63752159	T	C18 Malignant neoplasm of colon	0.00033772	0.042101	0.3416	0.0849	genotyped
rs10741006	22856019	C	C20 Malignant neoplasm of rectum	-0.00025435	0.023472	0.412258	0.3051	0.987636
rs11978267	50466304	A	C20 Malignant neoplasm of rectum	-6.107e-06	0.96042	0.2752	0.9387	genotyped
rs12769953	22407656	C	C20 Malignant neoplasm of rectum	-9.1863e-05	0.48542	0.225586	0.2288	0.992394
rs2239633	23589057	G	C20 Malignant neoplasm of rectum	4.0844e-05	0.71036	0.4838	0.09197	genotyped
rs2290400	38066240	C	C20 Malignant neoplasm of rectum	-0.00024809	0.024131	0.4891	0.1986	genotyped
rs2390536	21485397	A	C20 Malignant neoplasm of rectum	1.1458e-05	0.92023	0.363622	0.315	0.993467
rs3731249	21970916	C	C20 Malignant neoplasm of rectum	-0.00048117	0.15603	0.02696	0.473	genotyped
rs3740540	126294167	G	C20 Malignant neoplasm of rectum	7.732e-05	0.53281	0.2686	0.6892	genotyped
rs3824662	8104208	A	C20 Malignant neoplasm of rectum	7.0821e-05	0.62849	0.171996	0.2615	0.988987
rs4617118	130156143	G	C20 Malignant neoplasm of rectum	-2.6504e-06	0.98543	0.174868	0.6895	0.989614
rs4762284	96612762	T	C20 Malignant neoplasm of rectum	9.8575e-05	0.41324	0.295513	0.7244	0.997309
rs7089424	63752159	T	C20 Malignant neoplasm of rectum	2.3778e-05	0.83754	0.3416	0.0849	genotyped
rs10741006	22856019	C	C30-C39 Malignant neoplasms of respiratory and intrathoracic organs	-1.5154e-05	0.91374	0.412258	0.3051	0.987636
rs11978267	50466304	A	C30-C39 Malignant neoplasms of respiratory and intrathoracic organs	9.8667e-05	0.52012	0.2752	0.9387	genotyped
rs12769953	22407656	C	C30-C39 Malignant neoplasms of respiratory and intrathoracic organs	6.4954e-05	0.69224	0.225586	0.2288	0.992394
rs2239633	23589057	G	C30-C39 Malignant neoplasms of respiratory and intrathoracic organs	4.0896e-05	0.76547	0.4838	0.09197	genotyped
rs2290400	38066240	C	C30-C39 Malignant neoplasms of respiratory and intrathoracic organs	-5.2078e-05	0.70416	0.4891	0.1986	genotyped
rs2390536	21485397	A	C30-C39 Malignant neoplasms of respiratory and intrathoracic organs	0.00019488	0.1718	0.363622	0.315	0.993467
rs3731249	21970916	C	C30-C39 Malignant neoplasms of respiratory and intrathoracic organs	0.00021089	0.61799	0.02696	0.473	genotyped
rs3740540	126294167	G	C30-C39 Malignant neoplasms of respiratory and intrathoracic organs	-0.00012326	0.42494	0.2686	0.6892	genotyped
rs3824662	8104208	A	C30-C39 Malignant neoplasms of respiratory and intrathoracic organs	0.00035786	0.049766	0.171996	0.2615	0.988987
rs4617118	130156143	G	C30-C39 Malignant neoplasms of respiratory and intrathoracic organs	-7.3925e-05	0.68279	0.174868	0.6895	0.989614
rs4762284	96612762	T	C30-C39 Malignant neoplasms of respiratory and intrathoracic organs	6.0168e-07	0.9968	0.295513	0.7244	0.997309
rs7089424	63752159	T	C30-C39 Malignant neoplasms of respiratory and intrathoracic organs	0.00010507	0.46719	0.3416	0.0849	genotyped
rs10741006	22856019	C	C34 Malignant neoplasm of bronchus and lung	-6.828e-05	0.59748	0.412258	0.3051	0.987636
rs11978267	50466304	A	C34 Malignant neoplasm of bronchus and lung	0.00018284	0.19719	0.2752	0.9387	genotyped
rs12769953	22407656	C	C34 Malignant neoplasm of bronchus and lung	8.7261e-05	0.56509	0.225586	0.2288	0.992394
rs2239633	23589057	G	C34 Malignant neoplasm of bronchus and lung	6.1134e-05	0.62947	0.4838	0.09197	genotyped
rs2290400	38066240	C	C34 Malignant neoplasm of bronchus and lung	9.1842e-06	0.94224	0.4891	0.1986	genotyped
rs2390536	21485397	A	C34 Malignant neoplasm of bronchus and lung	0.0001594	0.22652	0.363622	0.315	0.993467
rs3731249	21970916	C	C34 Malignant neoplasm of bronchus and lung	0.0002472	0.52715	0.02696	0.473	genotyped
rs3740540	126294167	G	C34 Malignant neoplasm of bronchus and lung	-0.00010258	0.47252	0.2686	0.6892	genotyped
rs3824662	8104208	A	C34 Malignant neoplasm of bronchus and lung	0.00041515	0.013802	0.171996	0.2615	0.988987
rs4617118	130156143	G	C34 Malignant neoplasm of bronchus and lung	-3.3669e-05	0.84041	0.174868	0.6895	0.989614
rs4762284	96612762	T	C34 Malignant neoplasm of bronchus and lung	-3.0481e-05	0.82613	0.295513	0.7244	0.997309
rs7089424	63752159	T	C34 Malignant neoplasm of bronchus and lung	0.0001174	0.37948	0.3416	0.0849	genotyped
rs10741006	22856019	C	C43 Malignant melanoma of skin	-0.00012453	0.4286	0.412258	0.3051	0.987636
rs11978267	50466304	A	C43 Malignant melanoma of skin	0.0001032	0.54977	0.2752	0.9387	genotyped
rs12769953	22407656	C	C43 Malignant melanoma of skin	6.8141e-05	0.71192	0.225586	0.2288	0.992394
rs2239633	23589057	G	C43 Malignant melanoma of skin	0.00022953	0.13647	0.4838	0.09197	genotyped
rs2290400	38066240	C	C43 Malignant melanoma of skin	-0.00028274	0.066712	0.4891	0.1986	genotyped
rs2390536	21485397	A	C43 Malignant melanoma of skin	0.00024502	0.12665	0.363622	0.315	0.993467
rs3731249	21970916	C	C43 Malignant melanoma of skin	-0.00096163	0.043184	0.02696	0.473	genotyped
rs3740540	126294167	G	C43 Malignant melanoma of skin	9.8093e-05	0.57229	0.2686	0.6892	genotyped
rs3824662	8104208	A	C43 Malignant melanoma of skin	0.00041871	0.041206	0.171996	0.2615	0.988987
rs4617118	130156143	G	C43 Malignant melanoma of skin	-6.4571e-05	0.75089	0.174868	0.6895	0.989614
rs4762284	96612762	T	C43 Malignant melanoma of skin	-0.00011437	0.49817	0.295513	0.7244	0.997309
rs7089424	63752159	T	C43 Malignant melanoma of skin	1.9057e-05	0.90665	0.3416	0.0849	genotyped
rs10741006	22856019	C	C43-C44 Melanoma and other malignant neoplasms of skin	4.9708e-05	0.90196	0.412258	0.3051	0.987636
rs11978267	50466304	A	C43-C44 Melanoma and other malignant neoplasms of skin	0.0005579	0.20739	0.2752	0.9387	genotyped
rs12769953	22407656	C	C43-C44 Melanoma and other malignant neoplasms of skin	-0.0010362	0.028583	0.225586	0.2288	0.992394
rs2239633	23589057	G	C43-C44 Melanoma and other malignant neoplasms of skin	0.00071745	0.069494	0.4838	0.09197	genotyped
rs2290400	38066240	C	C43-C44 Melanoma and other malignant neoplasms of skin	-0.0013172	0.00086458	0.4891	0.1986	genotyped
rs2390536	21485397	A	C43-C44 Melanoma and other malignant neoplasms of skin	7.0997e-05	0.86298	0.363622	0.315	0.993467
rs3731249	21970916	C	C43-C44 Melanoma and other malignant neoplasms of skin	-0.0031443	0.0099634	0.02696	0.473	genotyped
rs3740540	126294167	G	C43-C44 Melanoma and other malignant neoplasms of skin	0.00056283	0.20656	0.2686	0.6892	genotyped
rs3824662	8104208	A	C43-C44 Melanoma and other malignant neoplasms of skin	0.00034807	0.50825	0.171996	0.2615	0.988987
rs4617118	130156143	G	C43-C44 Melanoma and other malignant neoplasms of skin	-0.0012543	0.016206	0.174868	0.6895	0.989614
rs4762284	96612762	T	C43-C44 Melanoma and other malignant neoplasms of skin	0.00054749	0.20615	0.295513	0.7244	0.997309
rs7089424	63752159	T	C43-C44 Melanoma and other malignant neoplasms of skin	0.0012754	0.0022154	0.3416	0.0849	genotyped
rs10741006	22856019	C	C44 Other malignant neoplasms of skin	0.0001773	0.63708	0.412258	0.3051	0.987636
rs11978267	50466304	A	C44 Other malignant neoplasms of skin	0.00045578	0.26869	0.2752	0.9387	genotyped
rs12769953	22407656	C	C44 Other malignant neoplasms of skin	-0.0011018	0.012434	0.225586	0.2288	0.992394
rs2239633	23589057	G	C44 Other malignant neoplasms of skin	0.00050121	0.17327	0.4838	0.09197	genotyped
rs2290400	38066240	C	C44 Other malignant neoplasms of skin	-0.0010474	0.00445	0.4891	0.1986	genotyped
rs2390536	21485397	A	C44 Other malignant neoplasms of skin	-0.00016473	0.66719	0.363622	0.315	0.993467
rs3731249	21970916	C	C44 Other malignant neoplasms of skin	-0.0022084	0.051939	0.02696	0.473	genotyped
rs3740540	126294167	G	C44 Other malignant neoplasms of skin	0.00047061	0.25675	0.2686	0.6892	genotyped
rs3824662	8104208	A	C44 Other malignant neoplasms of skin	-3.9546e-05	0.93567	0.171996	0.2615	0.988987
rs4617118	130156143	G	C44 Other malignant neoplasms of skin	-0.0012084	0.012889	0.174868	0.6895	0.989614
rs4762284	96612762	T	C44 Other malignant neoplasms of skin	0.00064803	0.10806	0.295513	0.7244	0.997309
rs7089424	63752159	T	C44 Other malignant neoplasms of skin	0.0012626	0.0011439	0.3416	0.0849	genotyped
rs10741006	22856019	C	C50 Malignant neoplasm of breast	-6.8888e-06	0.99043	0.412258	0.3051	0.987636
rs11978267	50466304	A	C50 Malignant neoplasm of breast	-0.00026202	0.67686	0.2752	0.9387	genotyped
rs12769953	22407656	C	C50 Malignant neoplasm of breast	0.00071004	0.29083	0.225586	0.2288	0.992394
rs2239633	23589057	G	C50 Malignant neoplasm of breast	-4.5548e-05	0.93518	0.4838	0.09197	genotyped
rs2290400	38066240	C	C50 Malignant neoplasm of breast	0.00038483	0.49273	0.4891	0.1986	genotyped
rs2390536	21485397	A	C50 Malignant neoplasm of breast	-0.00092795	0.11196	0.363622	0.315	0.993467
rs3731249	21970916	C	C50 Malignant neoplasm of breast	-0.00069867	0.68724	0.02696	0.473	genotyped
rs3740540	126294167	G	C50 Malignant neoplasm of breast	-0.00011904	0.85097	0.2686	0.6892	genotyped
rs3824662	8104208	A	C50 Malignant neoplasm of breast	0.00090959	0.22429	0.171996	0.2615	0.988987
rs4617118	130156143	G	C50 Malignant neoplasm of breast	0.0015607	0.034768	0.174868	0.6895	0.989614
rs4762284	96612762	T	C50 Malignant neoplasm of breast	-0.00040549	0.50964	0.295513	0.7244	0.997309
rs7089424	63752159	T	C50 Malignant neoplasm of breast	-0.00042919	0.46811	0.3416	0.0849	genotyped
rs10741006	22856019	C	C50-C50 Malignant neoplasm of breast	-6.8888e-06	0.99043	0.412258	0.3051	0.987636
rs11978267	50466304	A	C50-C50 Malignant neoplasm of breast	-0.00026202	0.67686	0.2752	0.9387	genotyped
rs12769953	22407656	C	C50-C50 Malignant neoplasm of breast	0.00071004	0.29083	0.225586	0.2288	0.992394
rs2239633	23589057	G	C50-C50 Malignant neoplasm of breast	-4.5548e-05	0.93518	0.4838	0.09197	genotyped
rs2290400	38066240	C	C50-C50 Malignant neoplasm of breast	0.00038483	0.49273	0.4891	0.1986	genotyped
rs2390536	21485397	A	C50-C50 Malignant neoplasm of breast	-0.00092795	0.11196	0.363622	0.315	0.993467
rs3731249	21970916	C	C50-C50 Malignant neoplasm of breast	-0.00069867	0.68724	0.02696	0.473	genotyped
rs3740540	126294167	G	C50-C50 Malignant neoplasm of breast	-0.00011904	0.85097	0.2686	0.6892	genotyped
rs3824662	8104208	A	C50-C50 Malignant neoplasm of breast	0.00090959	0.22429	0.171996	0.2615	0.988987
rs4617118	130156143	G	C50-C50 Malignant neoplasm of breast	0.0015607	0.034768	0.174868	0.6895	0.989614
rs4762284	96612762	T	C50-C50 Malignant neoplasm of breast	-0.00040549	0.50964	0.295513	0.7244	0.997309
rs7089424	63752159	T	C50-C50 Malignant neoplasm of breast	-0.00042919	0.46811	0.3416	0.0849	genotyped
rs10741006	22856019	C	C51-C58 Malignant neoplasms of female genital organs	-0.00034838	0.24313	0.412258	0.3051	0.987636
rs11978267	50466304	A	C51-C58 Malignant neoplasms of female genital organs	6.2398e-05	0.84869	0.2752	0.9387	genotyped
rs12769953	22407656	C	C51-C58 Malignant neoplasms of female genital organs	-4.7233e-05	0.89248	0.225586	0.2288	0.992394
rs2239633	23589057	G	C51-C58 Malignant neoplasms of female genital organs	-6.4089e-05	0.82613	0.4838	0.09197	genotyped
rs2290400	38066240	C	C51-C58 Malignant neoplasms of female genital organs	0.0002104	0.47138	0.4891	0.1986	genotyped
rs2390536	21485397	A	C51-C58 Malignant neoplasms of female genital organs	6.3657e-05	0.83397	0.363622	0.315	0.993467
rs3731249	21970916	C	C51-C58 Malignant neoplasms of female genital organs	-0.00058881	0.51451	0.02696	0.473	genotyped
rs3740540	126294167	G	C51-C58 Malignant neoplasms of female genital organs	0.00041403	0.20874	0.2686	0.6892	genotyped
rs3824662	8104208	A	C51-C58 Malignant neoplasms of female genital organs	-0.00018419	0.63597	0.171996	0.2615	0.988987
rs4617118	130156143	G	C51-C58 Malignant neoplasms of female genital organs	-1.1657e-05	0.97583	0.174868	0.6895	0.989614
rs4762284	96612762	T	C51-C58 Malignant neoplasms of female genital organs	-0.00033354	0.29679	0.295513	0.7244	0.997309
rs7089424	63752159	T	C51-C58 Malignant neoplasms of female genital organs	1.0406e-05	0.973	0.3416	0.0849	genotyped
rs10741006	22856019	C	C54 Malignant neoplasm of corpus uteri	-3.9736e-05	0.85034	0.412258	0.3051	0.987636
rs11978267	50466304	A	C54 Malignant neoplasm of corpus uteri	-0.00017817	0.44065	0.2752	0.9387	genotyped
rs12769953	22407656	C	C54 Malignant neoplasm of corpus uteri	1.4369e-05	0.95353	0.225586	0.2288	0.992394
rs2239633	23589057	G	C54 Malignant neoplasm of corpus uteri	-0.00014677	0.47611	0.4838	0.09197	genotyped
rs2290400	38066240	C	C54 Malignant neoplasm of corpus uteri	9.4646e-05	0.64618	0.4891	0.1986	genotyped
rs2390536	21485397	A	C54 Malignant neoplasm of corpus uteri	-2.019e-05	0.92503	0.363622	0.315	0.993467
rs3731249	21970916	C	C54 Malignant neoplasm of corpus uteri	-0.00056363	0.37689	0.02696	0.473	genotyped
rs3740540	126294167	G	C54 Malignant neoplasm of corpus uteri	0.00018327	0.43033	0.2686	0.6892	genotyped
rs3824662	8104208	A	C54 Malignant neoplasm of corpus uteri	-7.1869e-05	0.7935	0.171996	0.2615	0.988987
rs4617118	130156143	G	C54 Malignant neoplasm of corpus uteri	8.1136e-06	0.97617	0.174868	0.6895	0.989614
rs4762284	96612762	T	C54 Malignant neoplasm of corpus uteri	-9.1283e-05	0.68595	0.295513	0.7244	0.997309
rs7089424	63752159	T	C54 Malignant neoplasm of corpus uteri	-5.5002e-05	0.79988	0.3416	0.0849	genotyped
rs10741006	22856019	C	C56 Malignant neoplasm of ovary	-0.00034225	0.045056	0.412258	0.3051	0.987636
rs11978267	50466304	A	C56 Malignant neoplasm of ovary	9.4478e-06	0.95971	0.2752	0.9387	genotyped
rs12769953	22407656	C	C56 Malignant neoplasm of ovary	-5.2442e-05	0.7931	0.225586	0.2288	0.992394
rs2239633	23589057	G	C56 Malignant neoplasm of ovary	-7.3504e-05	0.65974	0.4838	0.09197	genotyped
rs2290400	38066240	C	C56 Malignant neoplasm of ovary	0.00023542	0.15884	0.4891	0.1986	genotyped
rs2390536	21485397	A	C56 Malignant neoplasm of ovary	1.7325e-05	0.92053	0.363622	0.315	0.993467
rs3731249	21970916	C	C56 Malignant neoplasm of ovary	-0.0001569	0.7615	0.02696	0.473	genotyped
rs3740540	126294167	G	C56 Malignant neoplasm of ovary	6.2703e-06	0.97346	0.2686	0.6892	genotyped
rs3824662	8104208	A	C56 Malignant neoplasm of ovary	9.1053e-05	0.68256	0.171996	0.2615	0.988987
rs4617118	130156143	G	C56 Malignant neoplasm of ovary	-0.00010209	0.64309	0.174868	0.6895	0.989614
rs4762284	96612762	T	C56 Malignant neoplasm of ovary	-0.00025854	0.15744	0.295513	0.7244	0.997309
rs7089424	63752159	T	C56 Malignant neoplasm of ovary	0.00020775	0.2377	0.3416	0.0849	genotyped
rs10741006	22856019	C	C60-C63 Malignant neoplasms of male genital organs	9.0437e-05	0.87145	0.412258	0.3051	0.987636
rs11978267	50466304	A	C60-C63 Malignant neoplasms of male genital organs	0.0003028	0.62138	0.2752	0.9387	genotyped
rs12769953	22407656	C	C60-C63 Malignant neoplasms of male genital organs	0.0020451	0.0018527	0.225586	0.2288	0.992394
rs2239633	23589057	G	C60-C63 Malignant neoplasms of male genital organs	0.00023429	0.66919	0.4838	0.09197	genotyped
rs2290400	38066240	C	C60-C63 Malignant neoplasms of male genital organs	-0.00040668	0.4591	0.4891	0.1986	genotyped
rs2390536	21485397	A	C60-C63 Malignant neoplasms of male genital organs	-0.00023603	0.67922	0.363622	0.315	0.993467
rs3731249	21970916	C	C60-C63 Malignant neoplasms of male genital organs	-0.0012325	0.46457	0.02696	0.473	genotyped
rs3740540	126294167	G	C60-C63 Malignant neoplasms of male genital organs	0.0012439	0.043997	0.2686	0.6892	genotyped
rs3824662	8104208	A	C60-C63 Malignant neoplasms of male genital organs	0.00015853	0.82778	0.171996	0.2615	0.988987
rs4617118	130156143	G	C60-C63 Malignant neoplasms of male genital organs	-0.00027544	0.7046	0.174868	0.6895	0.989614
rs4762284	96612762	T	C60-C63 Malignant neoplasms of male genital organs	0.0012347	0.039783	0.295513	0.7244	0.997309
rs7089424	63752159	T	C60-C63 Malignant neoplasms of male genital organs	-0.00060343	0.29741	0.3416	0.0849	genotyped
rs10741006	22856019	C	C61 Malignant neoplasm of prostate	9.3069e-05	0.86348	0.412258	0.3051	0.987636
rs11978267	50466304	A	C61 Malignant neoplasm of prostate	0.0004417	0.45694	0.2752	0.9387	genotyped
rs12769953	22407656	C	C61 Malignant neoplasm of prostate	0.0018923	0.0029402	0.225586	0.2288	0.992394
rs2239633	23589057	G	C61 Malignant neoplasm of prostate	0.00014224	0.78881	0.4838	0.09197	genotyped
rs2290400	38066240	C	C61 Malignant neoplasm of prostate	-0.00024728	0.64201	0.4891	0.1986	genotyped
rs2390536	21485397	A	C61 Malignant neoplasm of prostate	-0.00048446	0.3808	0.363622	0.315	0.993467
rs3731249	21970916	C	C61 Malignant neoplasm of prostate	-0.0015277	0.34935	0.02696	0.473	genotyped
rs3740540	126294167	G	C61 Malignant neoplasm of prostate	0.0012123	0.042689	0.2686	0.6892	genotyped
rs3824662	8104208	A	C61 Malignant neoplasm of prostate	1.9179e-05	0.97832	0.171996	0.2615	0.988987
rs4617118	130156143	G	C61 Malignant neoplasm of prostate	-0.00010868	0.87726	0.174868	0.6895	0.989614
rs4762284	96612762	T	C61 Malignant neoplasm of prostate	0.0010265	0.077638	0.295513	0.7244	0.997309
rs7089424	63752159	T	C61 Malignant neoplasm of prostate	-0.00078298	0.16272	0.3416	0.0849	genotyped
rs10741006	22856019	C	C64 Malignant neoplasm of kidney, except renal pelvis	4.487e-05	0.63975	0.412258	0.3051	0.987636
rs11978267	50466304	A	C64 Malignant neoplasm of kidney, except renal pelvis	9.3472e-05	0.37394	0.2752	0.9387	genotyped
rs12769953	22407656	C	C64 Malignant neoplasm of kidney, except renal pelvis	1.5809e-06	0.98878	0.225586	0.2288	0.992394
rs2239633	23589057	G	C64 Malignant neoplasm of kidney, except renal pelvis	6.8208e-05	0.46766	0.4838	0.09197	genotyped
rs2290400	38066240	C	C64 Malignant neoplasm of kidney, except renal pelvis	-4.4751e-05	0.63384	0.4891	0.1986	genotyped
rs2390536	21485397	A	C64 Malignant neoplasm of kidney, except renal pelvis	-5.2264e-05	0.59282	0.363622	0.315	0.993467
rs3731249	21970916	C	C64 Malignant neoplasm of kidney, except renal pelvis	8.221e-05	0.77661	0.02696	0.473	genotyped
rs3740540	126294167	G	C64 Malignant neoplasm of kidney, except renal pelvis	-0.00014558	0.16906	0.2686	0.6892	genotyped
rs3824662	8104208	A	C64 Malignant neoplasm of kidney, except renal pelvis	-5.7177e-05	0.64734	0.171996	0.2615	0.988987
rs4617118	130156143	G	C64 Malignant neoplasm of kidney, except renal pelvis	-7.914e-05	0.52307	0.174868	0.6895	0.989614
rs4762284	96612762	T	C64 Malignant neoplasm of kidney, except renal pelvis	0.00014316	0.16397	0.295513	0.7244	0.997309
rs7089424	63752159	T	C64 Malignant neoplasm of kidney, except renal pelvis	-0.00017039	0.085308	0.3416	0.0849	genotyped
rs10741006	22856019	C	C64-C68 Malignant neoplasms of urinary tract	4.4454e-05	0.74393	0.412258	0.3051	0.987636
rs11978267	50466304	A	C64-C68 Malignant neoplasms of urinary tract	-0.00013884	0.35212	0.2752	0.9387	genotyped
rs12769953	22407656	C	C64-C68 Malignant neoplasms of urinary tract	0.00013031	0.41432	0.225586	0.2288	0.992394
rs2239633	23589057	G	C64-C68 Malignant neoplasms of urinary tract	-7.6715e-05	0.56509	0.4838	0.09197	genotyped
rs2290400	38066240	C	C64-C68 Malignant neoplasms of urinary tract	-0.00012225	0.35935	0.4891	0.1986	genotyped
rs2390536	21485397	A	C64-C68 Malignant neoplasms of urinary tract	-0.00011099	0.42365	0.363622	0.315	0.993467
rs3731249	21970916	C	C64-C68 Malignant neoplasms of urinary tract	-1.0516e-05	0.9796	0.02696	0.473	genotyped
rs3740540	126294167	G	C64-C68 Malignant neoplasms of urinary tract	-2.311e-05	0.87778	0.2686	0.6892	genotyped
rs3824662	8104208	A	C64-C68 Malignant neoplasms of urinary tract	9.8013e-05	0.58067	0.171996	0.2615	0.988987
rs4617118	130156143	G	C64-C68 Malignant neoplasms of urinary tract	0.0001118	0.52537	0.174868	0.6895	0.989614
rs4762284	96612762	T	C64-C68 Malignant neoplasms of urinary tract	0.00018528	0.2046	0.295513	0.7244	0.997309
rs7089424	63752159	T	C64-C68 Malignant neoplasms of urinary tract	-6.4975e-05	0.64394	0.3416	0.0849	genotyped
rs10741006	22856019	C	C67 Malignant neoplasm of bladder	-1.1974e-05	0.89659	0.412258	0.3051	0.987636
rs11978267	50466304	A	C67 Malignant neoplasm of bladder	-0.00023025	0.022659	0.2752	0.9387	genotyped
rs12769953	22407656	C	C67 Malignant neoplasm of bladder	0.00011995	0.26702	0.225586	0.2288	0.992394
rs2239633	23589057	G	C67 Malignant neoplasm of bladder	-0.00015415	0.087697	0.4838	0.09197	genotyped
rs2290400	38066240	C	C67 Malignant neoplasm of bladder	-0.00011676	0.19611	0.4891	0.1986	genotyped
rs2390536	21485397	A	C67 Malignant neoplasm of bladder	3.1344e-05	0.73858	0.363622	0.315	0.993467
rs3731249	21970916	C	C67 Malignant neoplasm of bladder	-4.5489e-05	0.87024	0.02696	0.473	genotyped
rs3740540	126294167	G	C67 Malignant neoplasm of bladder	0.00011425	0.26142	0.2686	0.6892	genotyped
rs3824662	8104208	A	C67 Malignant neoplasm of bladder	0.00016218	0.17696	0.171996	0.2615	0.988987
rs4617118	130156143	G	C67 Malignant neoplasm of bladder	7.3426e-05	0.53783	0.174868	0.6895	0.989614
rs4762284	96612762	T	C67 Malignant neoplasm of bladder	-5.0138e-05	0.61219	0.295513	0.7244	0.997309
rs7089424	63752159	T	C67 Malignant neoplasm of bladder	7.7407e-05	0.41601	0.3416	0.0849	genotyped
rs10741006	22856019	C	C81-C96 Malignant neoplasms, stated or presumed to be primary, of lymphoid, haematopoietic and related tissue	0.00017533	0.31686	0.412258	0.3051	0.987636
rs11978267	50466304	A	C81-C96 Malignant neoplasms, stated or presumed to be primary, of lymphoid, haematopoietic and related tissue	-7.0066e-05	0.71526	0.2752	0.9387	genotyped
rs12769953	22407656	C	C81-C96 Malignant neoplasms, stated or presumed to be primary, of lymphoid, haematopoietic and related tissue	8.0556e-07	0.99687	0.225586	0.2288	0.992394
rs2239633	23589057	G	C81-C96 Malignant neoplasms, stated or presumed to be primary, of lymphoid, haematopoietic and related tissue	-0.0003596	0.036121	0.4838	0.09197	genotyped
rs2290400	38066240	C	C81-C96 Malignant neoplasms, stated or presumed to be primary, of lymphoid, haematopoietic and related tissue	7.6275e-05	0.6568	0.4891	0.1986	genotyped
rs2390536	21485397	A	C81-C96 Malignant neoplasms, stated or presumed to be primary, of lymphoid, haematopoietic and related tissue	0.00033342	0.06186	0.363622	0.315	0.993467
rs3731249	21970916	C	C81-C96 Malignant neoplasms, stated or presumed to be primary, of lymphoid, haematopoietic and related tissue	-0.00050061	0.34447	0.02696	0.473	genotyped
rs3740540	126294167	G	C81-C96 Malignant neoplasms, stated or presumed to be primary, of lymphoid, haematopoietic and related tissue	-4.0934e-05	0.8324	0.2686	0.6892	genotyped
rs3824662	8104208	A	C81-C96 Malignant neoplasms, stated or presumed to be primary, of lymphoid, haematopoietic and related tissue	0.00013688	0.54895	0.171996	0.2615	0.988987
rs4617118	130156143	G	C81-C96 Malignant neoplasms, stated or presumed to be primary, of lymphoid, haematopoietic and related tissue	0.00021889	0.33363	0.174868	0.6895	0.989614
rs4762284	96612762	T	C81-C96 Malignant neoplasms, stated or presumed to be primary, of lymphoid, haematopoietic and related tissue	-0.00010864	0.56315	0.295513	0.7244	0.997309
rs7089424	63752159	T	C81-C96 Malignant neoplasms, stated or presumed to be primary, of lymphoid, haematopoietic and related tissue	0.00014309	0.42906	0.3416	0.0849	genotyped
rs10741006	22856019	C	C83 Diffuse non-Hodgkin's lymphoma	-0.00014208	0.088575	0.412258	0.3051	0.987636
rs11978267	50466304	A	C83 Diffuse non-Hodgkin's lymphoma	1.9613e-05	0.83026	0.2752	0.9387	genotyped
rs12769953	22407656	C	C83 Diffuse non-Hodgkin's lymphoma	-1.8808e-05	0.84759	0.225586	0.2288	0.992394
rs2239633	23589057	G	C83 Diffuse non-Hodgkin's lymphoma	-3.8826e-05	0.63474	0.4838	0.09197	genotyped
rs2290400	38066240	C	C83 Diffuse non-Hodgkin's lymphoma	0.00011148	0.17279	0.4891	0.1986	genotyped
rs2390536	21485397	A	C83 Diffuse non-Hodgkin's lymphoma	9.3133e-05	0.27354	0.363622	0.315	0.993467
rs3731249	21970916	C	C83 Diffuse non-Hodgkin's lymphoma	-0.00012152	0.6298	0.02696	0.473	genotyped
rs3740540	126294167	G	C83 Diffuse non-Hodgkin's lymphoma	0.0001019	0.26866	0.2686	0.6892	genotyped
rs3824662	8104208	A	C83 Diffuse non-Hodgkin's lymphoma	-0.00010629	0.32849	0.171996	0.2615	0.988987
rs4617118	130156143	G	C83 Diffuse non-Hodgkin's lymphoma	-0.00014387	0.1822	0.174868	0.6895	0.989614
rs4762284	96612762	T	C83 Diffuse non-Hodgkin's lymphoma	-0.00013205	0.14018	0.295513	0.7244	0.997309
rs7089424	63752159	T	C83 Diffuse non-Hodgkin's lymphoma	5.6746e-05	0.51025	0.3416	0.0849	genotyped
rs10741006	22856019	C	carpal tunnel syndrome	1.8815e-05	0.82691	0.412258	0.3051	0.987636
rs11978267	50466304	A	carpal tunnel syndrome	-0.00024776	0.0086334	0.2752	0.9387	genotyped
rs12769953	22407656	C	carpal tunnel syndrome	-0.00029634	0.0033217	0.225586	0.2288	0.992394
rs2239633	23589057	G	carpal tunnel syndrome	6.2223e-05	0.46047	0.4838	0.09197	genotyped
rs2290400	38066240	C	carpal tunnel syndrome	5.1147e-05	0.54412	0.4891	0.1986	genotyped
rs2390536	21485397	A	carpal tunnel syndrome	-0.00013532	0.12286	0.363622	0.315	0.993467
rs3731249	21970916	C	carpal tunnel syndrome	-0.00043303	0.095923	0.02696	0.473	genotyped
rs3740540	126294167	G	carpal tunnel syndrome	2.2726e-05	0.81095	0.2686	0.6892	genotyped
rs3824662	8104208	A	carpal tunnel syndrome	0.00016305	0.14611	0.171996	0.2615	0.988987
rs4617118	130156143	G	carpal tunnel syndrome	6.8705e-05	0.53688	0.174868	0.6895	0.989614
rs4762284	96612762	T	carpal tunnel syndrome	-1.3695e-05	0.88208	0.295513	0.7244	0.997309
rs7089424	63752159	T	carpal tunnel syndrome	-0.00010449	0.23975	0.3416	0.0849	genotyped
rs10741006	22856019	C	cataract	4.7701e-06	0.98459	0.412258	0.3051	0.987636
rs11978267	50466304	A	cataract	-0.00010497	0.69845	0.2752	0.9387	genotyped
rs12769953	22407656	C	cataract	-0.00023257	0.42212	0.225586	0.2288	0.992394
rs2239633	23589057	G	cataract	9.1246e-05	0.70622	0.4838	0.09197	genotyped
rs2290400	38066240	C	cataract	-0.00010433	0.66658	0.4891	0.1986	genotyped
rs2390536	21485397	A	cataract	-0.00035823	0.15498	0.363622	0.315	0.993467
rs3731249	21970916	C	cataract	-0.00047213	0.52728	0.02696	0.473	genotyped
rs3740540	126294167	G	cataract	-4.0863e-05	0.88091	0.2686	0.6892	genotyped
rs3824662	8104208	A	cataract	-0.00013146	0.68311	0.171996	0.2615	0.988987
rs4617118	130156143	G	cataract	-0.00039949	0.21102	0.174868	0.6895	0.989614
rs4762284	96612762	T	cataract	0.00011676	0.65971	0.295513	0.7244	0.997309
rs7089424	63752159	T	cataract	-0.0003922	0.12425	0.3416	0.0849	genotyped
rs10741006	22856019	C	Cereal intake	-0.0032655	0.56238	0.412258	0.3051	0.987636
rs11978267	50466304	A	Cereal intake	0.013851	0.025033	0.2752	0.9387	genotyped
rs12769953	22407656	C	Cereal intake	-0.0025676	0.69777	0.225586	0.2288	0.992394
rs2239633	23589057	G	Cereal intake	-0.0084642	0.12492	0.4838	0.09197	genotyped
rs2290400	38066240	C	Cereal intake	0.0075459	0.17146	0.4891	0.1986	genotyped
rs2390536	21485397	A	Cereal intake	-0.0042871	0.45562	0.363622	0.315	0.993467
rs3731249	21970916	C	Cereal intake	0.012316	0.46967	0.02696	0.473	genotyped
rs3740540	126294167	G	Cereal intake	0.00060243	0.9229	0.2686	0.6892	genotyped
rs3824662	8104208	A	Cereal intake	-0.0088382	0.22914	0.171996	0.2615	0.988987
rs4617118	130156143	G	Cereal intake	-0.0049467	0.49739	0.174868	0.6895	0.989614
rs4762284	96612762	T	Cereal intake	-0.0011919	0.8437	0.295513	0.7244	0.997309
rs7089424	63752159	T	Cereal intake	0.0042641	0.46399	0.3416	0.0849	genotyped
rs10741006	22856019	C	cerebrovascular disease	3.1481e-05	0.91267	0.412258	0.3051	0.987636
rs11978267	50466304	A	cerebrovascular disease	0.00035593	0.25818	0.2752	0.9387	genotyped
rs12769953	22407656	C	cerebrovascular disease	0.00075123	0.025669	0.225586	0.2288	0.992394
rs2239633	23589057	G	cerebrovascular disease	-0.00011101	0.69311	0.4838	0.09197	genotyped
rs2290400	38066240	C	cerebrovascular disease	-3.8246e-05	0.89189	0.4891	0.1986	genotyped
rs2390536	21485397	A	cerebrovascular disease	0.00018678	0.52331	0.363622	0.315	0.993467
rs3731249	21970916	C	cerebrovascular disease	-0.00036152	0.67707	0.02696	0.473	genotyped
rs3740540	126294167	G	cerebrovascular disease	-6.5881e-05	0.83535	0.2686	0.6892	genotyped
rs3824662	8104208	A	cerebrovascular disease	-0.00070486	0.059643	0.171996	0.2615	0.988987
rs4617118	130156143	G	cerebrovascular disease	0.00045594	0.21938	0.174868	0.6895	0.989614
rs4762284	96612762	T	cerebrovascular disease	-0.00017892	0.56143	0.295513	0.7244	0.997309
rs7089424	63752159	T	cerebrovascular disease	0.00027739	0.34953	0.3416	0.0849	genotyped
rs10741006	22856019	C	cervical problem	9.6677e-05	0.6373	0.412258	0.3051	0.987636
rs11978267	50466304	A	cervical problem	-8.2684e-06	0.97064	0.2752	0.9387	genotyped
rs12769953	22407656	C	cervical problem	-0.00032293	0.17858	0.225586	0.2288	0.992394
rs2239633	23589057	G	cervical problem	0.00016112	0.42154	0.4838	0.09197	genotyped
rs2290400	38066240	C	cervical problem	2.2141e-05	0.91213	0.4891	0.1986	genotyped
rs2390536	21485397	A	cervical problem	4.148e-05	0.8424	0.363622	0.315	0.993467
rs3731249	21970916	C	cervical problem	-0.00020691	0.73876	0.02696	0.473	genotyped
rs3740540	126294167	G	cervical problem	-0.00043626	0.053859	0.2686	0.6892	genotyped
rs3824662	8104208	A	cervical problem	-0.00013147	0.62285	0.171996	0.2615	0.988987
rs4617118	130156143	G	cervical problem	-0.00020207	0.4449	0.174868	0.6895	0.989614
rs4762284	96612762	T	cervical problem	-0.00013583	0.53644	0.295513	0.7244	0.997309
rs7089424	63752159	T	cervical problem	9.3598e-05	0.65773	0.3416	0.0849	genotyped
rs10741006	22856019	C	cervical spondylosis	3.6822e-05	0.83785	0.412258	0.3051	0.987636
rs11978267	50466304	A	cervical spondylosis	-0.0001351	0.49356	0.2752	0.9387	genotyped
rs12769953	22407656	C	cervical spondylosis	-9.6635e-05	0.64704	0.225586	0.2288	0.992394
rs2239633	23589057	G	cervical spondylosis	-7.2076e-05	0.68261	0.4838	0.09197	genotyped
rs2290400	38066240	C	cervical spondylosis	0.00013203	0.45398	0.4891	0.1986	genotyped
rs2390536	21485397	A	cervical spondylosis	-0.00032662	0.074984	0.363622	0.315	0.993467
rs3731249	21970916	C	cervical spondylosis	0.00050097	0.35708	0.02696	0.473	genotyped
rs3740540	126294167	G	cervical spondylosis	-6.3488e-05	0.74931	0.2686	0.6892	genotyped
rs3824662	8104208	A	cervical spondylosis	8.4666e-05	0.71816	0.171996	0.2615	0.988987
rs4617118	130156143	G	cervical spondylosis	-0.00014804	0.5245	0.174868	0.6895	0.989614
rs4762284	96612762	T	cervical spondylosis	-0.00021581	0.2637	0.295513	0.7244	0.997309
rs7089424	63752159	T	cervical spondylosis	-5.3055e-05	0.7753	0.3416	0.0849	genotyped
rs10741006	22856019	C	Cheese intake	-0.00055398	0.79334	0.412258	0.3051	0.987636
rs11978267	50466304	A	Cheese intake	-0.0036768	0.11321	0.2752	0.9387	genotyped
rs12769953	22407656	C	Cheese intake	-0.0023808	0.33712	0.225586	0.2288	0.992394
rs2239633	23589057	G	Cheese intake	-0.00062115	0.76426	0.4838	0.09197	genotyped
rs2290400	38066240	C	Cheese intake	0.0014584	0.48145	0.4891	0.1986	genotyped
rs2390536	21485397	A	Cheese intake	0.0052099	0.015771	0.363622	0.315	0.993467
rs3731249	21970916	C	Cheese intake	-0.0066161	0.30063	0.02696	0.473	genotyped
rs3740540	126294167	G	Cheese intake	0.00066733	0.77503	0.2686	0.6892	genotyped
rs3824662	8104208	A	Cheese intake	-0.003589	0.19299	0.171996	0.2615	0.988987
rs4617118	130156143	G	Cheese intake	-0.0025252	0.35594	0.174868	0.6895	0.989614
rs4762284	96612762	T	Cheese intake	-0.0029143	0.1994	0.295513	0.7244	0.997309
rs7089424	63752159	T	Cheese intake	-0.00040895	0.85149	0.3416	0.0849	genotyped
rs10741006	22856019	C	chronic fatigue syndrome	9.8061e-05	0.49196	0.412258	0.3051	0.987636
rs11978267	50466304	A	chronic fatigue syndrome	-0.00022496	0.15036	0.2752	0.9387	genotyped
rs12769953	22407656	C	chronic fatigue syndrome	5.3909e-05	0.7474	0.225586	0.2288	0.992394
rs2239633	23589057	G	chronic fatigue syndrome	-4.8735e-05	0.72743	0.4838	0.09197	genotyped
rs2290400	38066240	C	chronic fatigue syndrome	0.00023544	0.092419	0.4891	0.1986	genotyped
rs2390536	21485397	A	chronic fatigue syndrome	-0.00011366	0.4344	0.363622	0.315	0.993467
rs3731249	21970916	C	chronic fatigue syndrome	-0.00031965	0.45865	0.02696	0.473	genotyped
rs3740540	126294167	G	chronic fatigue syndrome	0.00013985	0.37478	0.2686	0.6892	genotyped
rs3824662	8104208	A	chronic fatigue syndrome	-1.6792e-05	0.92808	0.171996	0.2615	0.988987
rs4617118	130156143	G	chronic fatigue syndrome	-4.3444e-07	0.99812	0.174868	0.6895	0.989614
rs4762284	96612762	T	chronic fatigue syndrome	1.6771e-05	0.91278	0.295513	0.7244	0.997309
rs7089424	63752159	T	chronic fatigue syndrome	0.00012464	0.39782	0.3416	0.0849	genotyped
rs10741006	22856019	C	chronic obstructive airways disease/copd	-0.00021084	0.094248	0.412258	0.3051	0.987636
rs11978267	50466304	A	chronic obstructive airways disease/copd	-0.00012423	0.36869	0.2752	0.9387	genotyped
rs12769953	22407656	C	chronic obstructive airways disease/copd	7.1062e-05	0.63064	0.225586	0.2288	0.992394
rs2239633	23589057	G	chronic obstructive airways disease/copd	7.1705e-06	0.95369	0.4838	0.09197	genotyped
rs2290400	38066240	C	chronic obstructive airways disease/copd	-9.8953e-05	0.42292	0.4891	0.1986	genotyped
rs2390536	21485397	A	chronic obstructive airways disease/copd	-6.705e-05	0.60174	0.363622	0.315	0.993467
rs3731249	21970916	C	chronic obstructive airways disease/copd	0.00073759	0.052796	0.02696	0.473	genotyped
rs3740540	126294167	G	chronic obstructive airways disease/copd	-0.00012169	0.38176	0.2686	0.6892	genotyped
rs3824662	8104208	A	chronic obstructive airways disease/copd	0.00025117	0.12627	0.171996	0.2615	0.988987
rs4617118	130156143	G	chronic obstructive airways disease/copd	5.4638e-05	0.73736	0.174868	0.6895	0.989614
rs4762284	96612762	T	chronic obstructive airways disease/copd	-3.0917e-05	0.81919	0.295513	0.7244	0.997309
rs7089424	63752159	T	chronic obstructive airways disease/copd	2.0552e-05	0.87453	0.3416	0.0849	genotyped
rs10741006	22856019	C	chronic/degenerative neurological problem	-0.00037674	0.023341	0.412258	0.3051	0.987636
rs11978267	50466304	A	chronic/degenerative neurological problem	7.8681e-05	0.66573	0.2752	0.9387	genotyped
rs12769953	22407656	C	chronic/degenerative neurological problem	0.00014269	0.46401	0.225586	0.2288	0.992394
rs2239633	23589057	G	chronic/degenerative neurological problem	-0.00016427	0.31272	0.4838	0.09197	genotyped
rs2290400	38066240	C	chronic/degenerative neurological problem	0.00023387	0.1509	0.4891	0.1986	genotyped
rs2390536	21485397	A	chronic/degenerative neurological problem	-5.0899e-06	0.97602	0.363622	0.315	0.993467
rs3731249	21970916	C	chronic/degenerative neurological problem	-0.0010006	0.046257	0.02696	0.473	genotyped
rs3740540	126294167	G	chronic/degenerative neurological problem	0.00015625	0.39435	0.2686	0.6892	genotyped
rs3824662	8104208	A	chronic/degenerative neurological problem	7.6252e-05	0.7248	0.171996	0.2615	0.988987
rs4617118	130156143	G	chronic/degenerative neurological problem	6.7181e-05	0.7544	0.174868	0.6895	0.989614
rs4762284	96612762	T	chronic/degenerative neurological problem	-3.1599e-05	0.8593	0.295513	0.7244	0.997309
rs7089424	63752159	T	chronic/degenerative neurological problem	0.00030993	0.070905	0.3416	0.0849	genotyped
rs10741006	22856019	C	clotting disorder/excessive bleeding	-2.6292e-05	0.78167	0.412258	0.3051	0.987636
rs11978267	50466304	A	clotting disorder/excessive bleeding	1.4954e-05	0.88572	0.2752	0.9387	genotyped
rs12769953	22407656	C	clotting disorder/excessive bleeding	3.5883e-05	0.74711	0.225586	0.2288	0.992394
rs2239633	23589057	G	clotting disorder/excessive bleeding	0.00020685	0.02608	0.4838	0.09197	genotyped
rs2290400	38066240	C	clotting disorder/excessive bleeding	-2.1277e-05	0.819	0.4891	0.1986	genotyped
rs2390536	21485397	A	clotting disorder/excessive bleeding	-2.4058e-05	0.80358	0.363622	0.315	0.993467
rs3731249	21970916	C	clotting disorder/excessive bleeding	-0.00036231	0.20648	0.02696	0.473	genotyped
rs3740540	126294167	G	clotting disorder/excessive bleeding	8.8171e-05	0.39998	0.2686	0.6892	genotyped
rs3824662	8104208	A	clotting disorder/excessive bleeding	-0.00014185	0.25146	0.171996	0.2615	0.988987
rs4617118	130156143	G	clotting disorder/excessive bleeding	-1.9166e-06	0.98753	0.174868	0.6895	0.989614
rs4762284	96612762	T	clotting disorder/excessive bleeding	-0.00021064	0.038558	0.295513	0.7244	0.997309
rs7089424	63752159	T	clotting disorder/excessive bleeding	-0.00011058	0.25916	0.3416	0.0849	genotyped
rs10741006	22856019	C	Coffee intake	0.001736	0.68088	0.412258	0.3051	0.987636
rs11978267	50466304	A	Coffee intake	-0.00269	0.56252	0.2752	0.9387	genotyped
rs12769953	22407656	C	Coffee intake	0.01152	0.019979	0.225586	0.2288	0.992394
rs2239633	23589057	G	Coffee intake	0.0084991	0.03975	0.4838	0.09197	genotyped
rs2290400	38066240	C	Coffee intake	0.0031281	0.4494	0.4891	0.1986	genotyped
rs2390536	21485397	A	Coffee intake	0.0034515	0.42414	0.363622	0.315	0.993467
rs3731249	21970916	C	Coffee intake	0.012858	0.31367	0.02696	0.473	genotyped
rs3740540	126294167	G	Coffee intake	-0.0086023	0.064957	0.2686	0.6892	genotyped
rs3824662	8104208	A	Coffee intake	-0.0018728	0.73364	0.171996	0.2615	0.988987
rs4617118	130156143	G	Coffee intake	0.0040433	0.45891	0.174868	0.6895	0.989614
rs4762284	96612762	T	Coffee intake	-0.0060041	0.18507	0.295513	0.7244	0.997309
rs7089424	63752159	T	Coffee intake	-0.0016189	0.71044	0.3416	0.0849	genotyped
rs10741006	22856019	C	colitis/not crohns or ulcerative colitis	-1.4744e-05	0.89232	0.412258	0.3051	0.987636
rs11978267	50466304	A	colitis/not crohns or ulcerative colitis	-3.0014e-05	0.8015	0.2752	0.9387	genotyped
rs12769953	22407656	C	colitis/not crohns or ulcerative colitis	7.9844e-06	0.95017	0.225586	0.2288	0.992394
rs2239633	23589057	G	colitis/not crohns or ulcerative colitis	-3.9571e-05	0.7107	0.4838	0.09197	genotyped
rs2290400	38066240	C	colitis/not crohns or ulcerative colitis	0.00031352	0.0033083	0.4891	0.1986	genotyped
rs2390536	21485397	A	colitis/not crohns or ulcerative colitis	0.00012069	0.27686	0.363622	0.315	0.993467
rs3731249	21970916	C	colitis/not crohns or ulcerative colitis	-8.4051e-05	0.79845	0.02696	0.473	genotyped
rs3740540	126294167	G	colitis/not crohns or ulcerative colitis	6.0908e-05	0.61254	0.2686	0.6892	genotyped
rs3824662	8104208	A	colitis/not crohns or ulcerative colitis	4.4866e-05	0.75203	0.171996	0.2615	0.988987
rs4617118	130156143	G	colitis/not crohns or ulcerative colitis	0.00014323	0.3089	0.174868	0.6895	0.989614
rs4762284	96612762	T	colitis/not crohns or ulcerative colitis	4.9288e-05	0.6732	0.295513	0.7244	0.997309
rs7089424	63752159	T	colitis/not crohns or ulcerative colitis	-6.8389e-05	0.54327	0.3416	0.0849	genotyped
rs10741006	22856019	C	Comparative body size at age 10	-0.0042955	0.00070055	0.412258	0.3051	0.987636
rs11978267	50466304	A	Comparative body size at age 10	-0.0026397	0.057942	0.2752	0.9387	genotyped
rs12769953	22407656	C	Comparative body size at age 10	0.00028461	0.84817	0.225586	0.2288	0.992394
rs2239633	23589057	G	Comparative body size at age 10	-0.0025697	0.038275	0.4838	0.09197	genotyped
rs2290400	38066240	C	Comparative body size at age 10	0.0021119	0.088735	0.4891	0.1986	genotyped
rs2390536	21485397	A	Comparative body size at age 10	-0.0014566	0.2604	0.363622	0.315	0.993467
rs3731249	21970916	C	Comparative body size at age 10	0.0043042	0.2617	0.02696	0.473	genotyped
rs3740540	126294167	G	Comparative body size at age 10	0.0010405	0.45717	0.2686	0.6892	genotyped
rs3824662	8104208	A	Comparative body size at age 10	0.003343	0.043057	0.171996	0.2615	0.988987
rs4617118	130156143	G	Comparative body size at age 10	-0.00036602	0.8234	0.174868	0.6895	0.989614
rs4762284	96612762	T	Comparative body size at age 10	-0.00093033	0.495	0.295513	0.7244	0.997309
rs7089424	63752159	T	Comparative body size at age 10	0.003161	0.015755	0.3416	0.0849	genotyped
rs10741006	22856019	C	Comparative height size at age 10	-0.0037491	0.001212	0.412258	0.3051	0.987636
rs11978267	50466304	A	Comparative height size at age 10	-0.0047945	0.00016818	0.2752	0.9387	genotyped
rs12769953	22407656	C	Comparative height size at age 10	0.0026837	0.04829	0.225586	0.2288	0.992394
rs2239633	23589057	G	Comparative height size at age 10	0.0017034	0.13227	0.4838	0.09197	genotyped
rs2290400	38066240	C	Comparative height size at age 10	-0.0027904	0.013969	0.4891	0.1986	genotyped
rs2390536	21485397	A	Comparative height size at age 10	-0.0005985	0.61341	0.363622	0.315	0.993467
rs3731249	21970916	C	Comparative height size at age 10	-0.0010957	0.7545	0.02696	0.473	genotyped
rs3740540	126294167	G	Comparative height size at age 10	-0.0069274	6.1296e-08	0.2686	0.6892	genotyped
rs3824662	8104208	A	Comparative height size at age 10	-8.0643e-05	0.95742	0.171996	0.2615	0.988987
rs4617118	130156143	G	Comparative height size at age 10	0.0046128	0.0021005	0.174868	0.6895	0.989614
rs4762284	96612762	T	Comparative height size at age 10	0.00038653	0.75685	0.295513	0.7244	0.997309
rs7089424	63752159	T	Comparative height size at age 10	-0.0063174	1.3011e-07	0.3416	0.0849	genotyped
rs10741006	22856019	C	connective tissue disorder	-0.00017648	0.30625	0.412258	0.3051	0.987636
rs11978267	50466304	A	connective tissue disorder	0.00015222	0.42095	0.2752	0.9387	genotyped
rs12769953	22407656	C	connective tissue disorder	0.00030185	0.13573	0.225586	0.2288	0.992394
rs2239633	23589057	G	connective tissue disorder	0.00017574	0.29849	0.4838	0.09197	genotyped
rs2290400	38066240	C	connective tissue disorder	0.00037624	0.026085	0.4891	0.1986	genotyped
rs2390536	21485397	A	connective tissue disorder	-9.7273e-05	0.58013	0.363622	0.315	0.993467
rs3731249	21970916	C	connective tissue disorder	0.00034723	0.50545	0.02696	0.473	genotyped
rs3740540	126294167	G	connective tissue disorder	0.00012311	0.51806	0.2686	0.6892	genotyped
rs3824662	8104208	A	connective tissue disorder	-0.00035259	0.11692	0.171996	0.2615	0.988987
rs4617118	130156143	G	connective tissue disorder	-1.9653e-05	0.92979	0.174868	0.6895	0.989614
rs4762284	96612762	T	connective tissue disorder	0.00017531	0.3436	0.295513	0.7244	0.997309
rs7089424	63752159	T	connective tissue disorder	0.00024325	0.17219	0.3416	0.0849	genotyped
rs10741006	22856019	C	Cooked vegetable intake	0.0051676	0.1207	0.412258	0.3051	0.987636
rs11978267	50466304	A	Cooked vegetable intake	0.0072163	0.048125	0.2752	0.9387	genotyped
rs12769953	22407656	C	Cooked vegetable intake	-0.0043902	0.26102	0.225586	0.2288	0.992394
rs2239633	23589057	G	Cooked vegetable intake	-0.001777	0.58588	0.4838	0.09197	genotyped
rs2290400	38066240	C	Cooked vegetable intake	0.0084406	0.0096642	0.4891	0.1986	genotyped
rs2390536	21485397	A	Cooked vegetable intake	-0.0054091	0.11107	0.363622	0.315	0.993467
rs3731249	21970916	C	Cooked vegetable intake	-0.00040308	0.96806	0.02696	0.473	genotyped
rs3740540	126294167	G	Cooked vegetable intake	0.0087316	0.017565	0.2686	0.6892	genotyped
rs3824662	8104208	A	Cooked vegetable intake	0.0053573	0.21721	0.171996	0.2615	0.988987
rs4617118	130156143	G	Cooked vegetable intake	-0.0024146	0.57501	0.174868	0.6895	0.989614
rs4762284	96612762	T	Cooked vegetable intake	-0.0037818	0.29009	0.295513	0.7244	0.997309
rs7089424	63752159	T	Cooked vegetable intake	0.0079453	0.020897	0.3416	0.0849	genotyped
rs10741006	22856019	C	cranial nerve problem/palsy	-3.3399e-05	0.72474	0.412258	0.3051	0.987636
rs11978267	50466304	A	cranial nerve problem/palsy	0.00016674	0.10887	0.2752	0.9387	genotyped
rs12769953	22407656	C	cranial nerve problem/palsy	-0.00014616	0.18892	0.225586	0.2288	0.992394
rs2239633	23589057	G	cranial nerve problem/palsy	-0.00016568	0.074649	0.4838	0.09197	genotyped
rs2290400	38066240	C	cranial nerve problem/palsy	-8.6312e-06	0.92604	0.4891	0.1986	genotyped
rs2390536	21485397	A	cranial nerve problem/palsy	3.421e-05	0.72347	0.363622	0.315	0.993467
rs3731249	21970916	C	cranial nerve problem/palsy	0.00030243	0.29144	0.02696	0.473	genotyped
rs3740540	126294167	G	cranial nerve problem/palsy	-8.1312e-05	0.43753	0.2686	0.6892	genotyped
rs3824662	8104208	A	cranial nerve problem/palsy	-3.8091e-05	0.75806	0.171996	0.2615	0.988987
rs4617118	130156143	G	cranial nerve problem/palsy	5.4063e-05	0.65946	0.174868	0.6895	0.989614
rs4762284	96612762	T	cranial nerve problem/palsy	0.00020472	0.044287	0.295513	0.7244	0.997309
rs7089424	63752159	T	cranial nerve problem/palsy	8.5155e-05	0.38477	0.3416	0.0849	genotyped
rs10741006	22856019	C	Current tobacco smoking	-0.0003328	0.76517	0.412258	0.3051	0.987636
rs11978267	50466304	A	Current tobacco smoking	-0.0011424	0.34993	0.2752	0.9387	genotyped
rs12769953	22407656	C	Current tobacco smoking	0.0032887	0.011856	0.225586	0.2288	0.992394
rs2239633	23589057	G	Current tobacco smoking	0.0024429	0.025153	0.4838	0.09197	genotyped
rs2290400	38066240	C	Current tobacco smoking	-0.0012587	0.24855	0.4891	0.1986	genotyped
rs2390536	21485397	A	Current tobacco smoking	-0.0017185	0.1304	0.363622	0.315	0.993467
rs3731249	21970916	C	Current tobacco smoking	0.0069887	0.03801	0.02696	0.473	genotyped
rs3740540	126294167	G	Current tobacco smoking	0.00086472	0.48215	0.2686	0.6892	genotyped
rs3824662	8104208	A	Current tobacco smoking	0.002813	0.052812	0.171996	0.2615	0.988987
rs4617118	130156143	G	Current tobacco smoking	0.00062829	0.66263	0.174868	0.6895	0.989614
rs4762284	96612762	T	Current tobacco smoking	0.0013169	0.27056	0.295513	0.7244	0.997309
rs7089424	63752159	T	Current tobacco smoking	-0.0019859	0.08444	0.3416	0.0849	genotyped
rs10741006	22856019	C	D00-D09 In situ neoplasms	9.4304e-05	0.72165	0.412258	0.3051	0.987636
rs11978267	50466304	A	D00-D09 In situ neoplasms	0.00039972	0.16844	0.2752	0.9387	genotyped
rs12769953	22407656	C	D00-D09 In situ neoplasms	1.7348e-05	0.95544	0.225586	0.2288	0.992394
rs2239633	23589057	G	D00-D09 In situ neoplasms	-0.0004496	0.08292	0.4838	0.09197	genotyped
rs2290400	38066240	C	D00-D09 In situ neoplasms	0.0005869	0.023696	0.4891	0.1986	genotyped
rs2390536	21485397	A	D00-D09 In situ neoplasms	-0.00026346	0.32887	0.363622	0.315	0.993467
rs3731249	21970916	C	D00-D09 In situ neoplasms	-0.00078702	0.32519	0.02696	0.473	genotyped
rs3740540	126294167	G	D00-D09 In situ neoplasms	0.00048564	0.096632	0.2686	0.6892	genotyped
rs3824662	8104208	A	D00-D09 In situ neoplasms	-0.00013337	0.69918	0.171996	0.2615	0.988987
rs4617118	130156143	G	D00-D09 In situ neoplasms	-0.00053141	0.1204	0.174868	0.6895	0.989614
rs4762284	96612762	T	D00-D09 In situ neoplasms	-0.00070277	0.013329	0.295513	0.7244	0.997309
rs7089424	63752159	T	D00-D09 In situ neoplasms	-7.0699e-05	0.79598	0.3416	0.0849	genotyped
rs10741006	22856019	C	D03 Melanoma in situ	4.7403e-05	0.62888	0.412258	0.3051	0.987636
rs11978267	50466304	A	D03 Melanoma in situ	7.3807e-07	0.99452	0.2752	0.9387	genotyped
rs12769953	22407656	C	D03 Melanoma in situ	-0.00018203	0.11359	0.225586	0.2288	0.992394
rs2239633	23589057	G	D03 Melanoma in situ	6.6845e-05	0.48654	0.4838	0.09197	genotyped
rs2290400	38066240	C	D03 Melanoma in situ	0.00020368	0.034095	0.4891	0.1986	genotyped
rs2390536	21485397	A	D03 Melanoma in situ	4.6012e-05	0.64529	0.363622	0.315	0.993467
rs3731249	21970916	C	D03 Melanoma in situ	-0.0010043	0.0007054	0.02696	0.473	genotyped
rs3740540	126294167	G	D03 Melanoma in situ	0.00034397	0.0014931	0.2686	0.6892	genotyped
rs3824662	8104208	A	D03 Melanoma in situ	4.447e-05	0.72802	0.171996	0.2615	0.988987
rs4617118	130156143	G	D03 Melanoma in situ	0.0001809	0.15369	0.174868	0.6895	0.989614
rs4762284	96612762	T	D03 Melanoma in situ	-6.1249e-06	0.9536	0.295513	0.7244	0.997309
rs7089424	63752159	T	D03 Melanoma in situ	6.2991e-05	0.53412	0.3416	0.0849	genotyped
rs10741006	22856019	C	D04 Carcinoma in situ of skin	9.9065e-06	0.9212	0.412258	0.3051	0.987636
rs11978267	50466304	A	D04 Carcinoma in situ of skin	5.5339e-05	0.61433	0.2752	0.9387	genotyped
rs12769953	22407656	C	D04 Carcinoma in situ of skin	-9.7725e-05	0.40542	0.225586	0.2288	0.992394
rs2239633	23589057	G	D04 Carcinoma in situ of skin	-8.691e-05	0.37556	0.4838	0.09197	genotyped
rs2290400	38066240	C	D04 Carcinoma in situ of skin	-0.0001711	0.081321	0.4891	0.1986	genotyped
rs2390536	21485397	A	D04 Carcinoma in situ of skin	-0.00011507	0.25972	0.363622	0.315	0.993467
rs3731249	21970916	C	D04 Carcinoma in situ of skin	-0.00016716	0.58062	0.02696	0.473	genotyped
rs3740540	126294167	G	D04 Carcinoma in situ of skin	-0.00013725	0.21451	0.2686	0.6892	genotyped
rs3824662	8104208	A	D04 Carcinoma in situ of skin	5.1683e-05	0.69221	0.171996	0.2615	0.988987
rs4617118	130156143	G	D04 Carcinoma in situ of skin	-0.00011052	0.39331	0.174868	0.6895	0.989614
rs4762284	96612762	T	D04 Carcinoma in situ of skin	-9.141e-05	0.39465	0.295513	0.7244	0.997309
rs7089424	63752159	T	D04 Carcinoma in situ of skin	0.00016497	0.11074	0.3416	0.0849	genotyped
rs10741006	22856019	C	D05 Carcinoma in situ of breast	-1.0774e-06	0.99657	0.412258	0.3051	0.987636
rs11978267	50466304	A	D05 Carcinoma in situ of breast	0.0002782	0.31113	0.2752	0.9387	genotyped
rs12769953	22407656	C	D05 Carcinoma in situ of breast	0.0001851	0.5282	0.225586	0.2288	0.992394
rs2239633	23589057	G	D05 Carcinoma in situ of breast	-0.00028018	0.25304	0.4838	0.09197	genotyped
rs2290400	38066240	C	D05 Carcinoma in situ of breast	0.00013797	0.57399	0.4891	0.1986	genotyped
rs2390536	21485397	A	D05 Carcinoma in situ of breast	-8.9669e-05	0.72517	0.363622	0.315	0.993467
rs3731249	21970916	C	D05 Carcinoma in situ of breast	0.00063552	0.40202	0.02696	0.473	genotyped
rs3740540	126294167	G	D05 Carcinoma in situ of breast	0.00011572	0.67567	0.2686	0.6892	genotyped
rs3824662	8104208	A	D05 Carcinoma in situ of breast	-0.00075461	0.020927	0.171996	0.2615	0.988987
rs4617118	130156143	G	D05 Carcinoma in situ of breast	-0.00022983	0.47733	0.174868	0.6895	0.989614
rs4762284	96612762	T	D05 Carcinoma in situ of breast	-0.0008788	0.0010763	0.295513	0.7244	0.997309
rs7089424	63752159	T	D05 Carcinoma in situ of breast	8.5044e-06	0.97373	0.3416	0.0849	genotyped
rs10741006	22856019	C	D06 Carcinoma in situ of cervix uteri	-9.458e-05	0.71534	0.412258	0.3051	0.987636
rs11978267	50466304	A	D06 Carcinoma in situ of cervix uteri	-7.6662e-05	0.78731	0.2752	0.9387	genotyped
rs12769953	22407656	C	D06 Carcinoma in situ of cervix uteri	0.00018553	0.54117	0.225586	0.2288	0.992394
rs2239633	23589057	G	D06 Carcinoma in situ of cervix uteri	-8.5575e-05	0.73565	0.4838	0.09197	genotyped
rs2290400	38066240	C	D06 Carcinoma in situ of cervix uteri	0.0011161	1.0901e-05	0.4891	0.1986	genotyped
rs2390536	21485397	A	D06 Carcinoma in situ of cervix uteri	-0.0002645	0.31611	0.363622	0.315	0.993467
rs3731249	21970916	C	D06 Carcinoma in situ of cervix uteri	-0.00012783	0.87059	0.02696	0.473	genotyped
rs3740540	126294167	G	D06 Carcinoma in situ of cervix uteri	0.00015354	0.59161	0.2686	0.6892	genotyped
rs3824662	8104208	A	D06 Carcinoma in situ of cervix uteri	0.00030405	0.3685	0.171996	0.2615	0.988987
rs4617118	130156143	G	D06 Carcinoma in situ of cervix uteri	-0.00041374	0.21573	0.174868	0.6895	0.989614
rs4762284	96612762	T	D06 Carcinoma in situ of cervix uteri	-0.00020208	0.46687	0.295513	0.7244	0.997309
rs7089424	63752159	T	D06 Carcinoma in situ of cervix uteri	-0.00012158	0.64909	0.3416	0.0849	genotyped
rs10741006	22856019	C	D10-D36 Benign neoplasms	6.4819e-06	0.94066	0.412258	0.3051	0.987636
rs11978267	50466304	A	D10-D36 Benign neoplasms	9.686e-05	0.31068	0.2752	0.9387	genotyped
rs12769953	22407656	C	D10-D36 Benign neoplasms	-6.3578e-05	0.53364	0.225586	0.2288	0.992394
rs2239633	23589057	G	D10-D36 Benign neoplasms	-6.6919e-05	0.43288	0.4838	0.09197	genotyped
rs2290400	38066240	C	D10-D36 Benign neoplasms	-2.3313e-05	0.78488	0.4891	0.1986	genotyped
rs2390536	21485397	A	D10-D36 Benign neoplasms	-8.9921e-05	0.31136	0.363622	0.315	0.993467
rs3731249	21970916	C	D10-D36 Benign neoplasms	-6.3878e-05	0.80827	0.02696	0.473	genotyped
rs3740540	126294167	G	D10-D36 Benign neoplasms	-0.00010915	0.2563	0.2686	0.6892	genotyped
rs3824662	8104208	A	D10-D36 Benign neoplasms	0.00025815	0.022974	0.171996	0.2615	0.988987
rs4617118	130156143	G	D10-D36 Benign neoplasms	0.00021822	0.052685	0.174868	0.6895	0.989614
rs4762284	96612762	T	D10-D36 Benign neoplasms	-2.2454e-05	0.81024	0.295513	0.7244	0.997309
rs7089424	63752159	T	D10-D36 Benign neoplasms	1.8464e-05	0.83737	0.3416	0.0849	genotyped
rs10741006	22856019	C	D37-D48 Neoplasms of uncertain or unknown behaviour	-6.0892e-05	0.66539	0.412258	0.3051	0.987636
rs11978267	50466304	A	D37-D48 Neoplasms of uncertain or unknown behaviour	-0.00027218	0.07792	0.2752	0.9387	genotyped
rs12769953	22407656	C	D37-D48 Neoplasms of uncertain or unknown behaviour	-0.00037129	0.024564	0.225586	0.2288	0.992394
rs2239633	23589057	G	D37-D48 Neoplasms of uncertain or unknown behaviour	0.00015079	0.2744	0.4838	0.09197	genotyped
rs2290400	38066240	C	D37-D48 Neoplasms of uncertain or unknown behaviour	0.00012867	0.35118	0.4891	0.1986	genotyped
rs2390536	21485397	A	D37-D48 Neoplasms of uncertain or unknown behaviour	0.00011613	0.4185	0.363622	0.315	0.993467
rs3731249	21970916	C	D37-D48 Neoplasms of uncertain or unknown behaviour	0.00051931	0.22239	0.02696	0.473	genotyped
rs3740540	126294167	G	D37-D48 Neoplasms of uncertain or unknown behaviour	-0.00029923	0.054271	0.2686	0.6892	genotyped
rs3824662	8104208	A	D37-D48 Neoplasms of uncertain or unknown behaviour	5.2818e-05	0.77356	0.171996	0.2615	0.988987
rs4617118	130156143	G	D37-D48 Neoplasms of uncertain or unknown behaviour	0.00012321	0.49853	0.174868	0.6895	0.989614
rs4762284	96612762	T	D37-D48 Neoplasms of uncertain or unknown behaviour	-7.3092e-05	0.62856	0.295513	0.7244	0.997309
rs7089424	63752159	T	D37-D48 Neoplasms of uncertain or unknown behaviour	4.3652e-05	0.76408	0.3416	0.0849	genotyped
rs10741006	22856019	C	D41 Neoplasm of uncertain or unknown behaviour of urinary organs	-7.3958e-05	0.37775	0.412258	0.3051	0.987636
rs11978267	50466304	A	D41 Neoplasm of uncertain or unknown behaviour of urinary organs	-0.00014032	0.12692	0.2752	0.9387	genotyped
rs12769953	22407656	C	D41 Neoplasm of uncertain or unknown behaviour of urinary organs	-3.2603e-05	0.74027	0.225586	0.2288	0.992394
rs2239633	23589057	G	D41 Neoplasm of uncertain or unknown behaviour of urinary organs	0.00011734	0.15312	0.4838	0.09197	genotyped
rs2290400	38066240	C	D41 Neoplasm of uncertain or unknown behaviour of urinary organs	2.4872e-05	0.76209	0.4891	0.1986	genotyped
rs2390536	21485397	A	D41 Neoplasm of uncertain or unknown behaviour of urinary organs	-2.2138e-05	0.79561	0.363622	0.315	0.993467
rs3731249	21970916	C	D41 Neoplasm of uncertain or unknown behaviour of urinary organs	0.00026538	0.29487	0.02696	0.473	genotyped
rs3740540	126294167	G	D41 Neoplasm of uncertain or unknown behaviour of urinary organs	-7.8522e-05	0.39639	0.2686	0.6892	genotyped
rs3824662	8104208	A	D41 Neoplasm of uncertain or unknown behaviour of urinary organs	-7.6841e-05	0.48212	0.171996	0.2615	0.988987
rs4617118	130156143	G	D41 Neoplasm of uncertain or unknown behaviour of urinary organs	2.3195e-05	0.83057	0.174868	0.6895	0.989614
rs4762284	96612762	T	D41 Neoplasm of uncertain or unknown behaviour of urinary organs	-2.2803e-05	0.79995	0.295513	0.7244	0.997309
rs7089424	63752159	T	D41 Neoplasm of uncertain or unknown behaviour of urinary organs	7.3351e-05	0.39707	0.3416	0.0849	genotyped
rs10741006	22856019	C	D50 Iron deficiency anaemia	-0.00016782	0.56041	0.412258	0.3051	0.987636
rs11978267	50466304	A	D50 Iron deficiency anaemia	0.00020317	0.52042	0.2752	0.9387	genotyped
rs12769953	22407656	C	D50 Iron deficiency anaemia	0.00050697	0.13373	0.225586	0.2288	0.992394
rs2239633	23589057	G	D50 Iron deficiency anaemia	3.8459e-05	0.89168	0.4838	0.09197	genotyped
rs2290400	38066240	C	D50 Iron deficiency anaemia	-0.00045023	0.11099	0.4891	0.1986	genotyped
rs2390536	21485397	A	D50 Iron deficiency anaemia	0.00042902	0.14434	0.363622	0.315	0.993467
rs3731249	21970916	C	D50 Iron deficiency anaemia	-0.0013464	0.12218	0.02696	0.473	genotyped
rs3740540	126294167	G	D50 Iron deficiency anaemia	-0.00040227	0.20625	0.2686	0.6892	genotyped
rs3824662	8104208	A	D50 Iron deficiency anaemia	-0.000341	0.36418	0.171996	0.2615	0.988987
rs4617118	130156143	G	D50 Iron deficiency anaemia	4.7673e-05	0.8982	0.174868	0.6895	0.989614
rs4762284	96612762	T	D50 Iron deficiency anaemia	0.00068376	0.027076	0.295513	0.7244	0.997309
rs7089424	63752159	T	D50 Iron deficiency anaemia	-0.0003323	0.26439	0.3416	0.0849	genotyped
rs10741006	22856019	C	D50-D53 Nutritional anaemias	-0.00022853	0.45222	0.412258	0.3051	0.987636
rs11978267	50466304	A	D50-D53 Nutritional anaemias	0.00031632	0.34267	0.2752	0.9387	genotyped
rs12769953	22407656	C	D50-D53 Nutritional anaemias	0.00072322	0.042546	0.225586	0.2288	0.992394
rs2239633	23589057	G	D50-D53 Nutritional anaemias	0.00015203	0.60976	0.4838	0.09197	genotyped
rs2290400	38066240	C	D50-D53 Nutritional anaemias	-0.00037637	0.20649	0.4891	0.1986	genotyped
rs2390536	21485397	A	D50-D53 Nutritional anaemias	0.00042724	0.16802	0.363622	0.315	0.993467
rs3731249	21970916	C	D50-D53 Nutritional anaemias	-0.0013857	0.13145	0.02696	0.473	genotyped
rs3740540	126294167	G	D50-D53 Nutritional anaemias	-0.00046554	0.16551	0.2686	0.6892	genotyped
rs3824662	8104208	A	D50-D53 Nutritional anaemias	-0.00015254	0.70035	0.171996	0.2615	0.988987
rs4617118	130156143	G	D50-D53 Nutritional anaemias	6.9482e-05	0.85966	0.174868	0.6895	0.989614
rs4762284	96612762	T	D50-D53 Nutritional anaemias	0.00071887	0.027554	0.295513	0.7244	0.997309
rs7089424	63752159	T	D50-D53 Nutritional anaemias	-0.00026698	0.39524	0.3416	0.0849	genotyped
rs10741006	22856019	C	D51 Vitamin B12 deficiency anaemia	-8.8236e-05	0.37055	0.412258	0.3051	0.987636
rs11978267	50466304	A	D51 Vitamin B12 deficiency anaemia	3.8024e-05	0.72489	0.2752	0.9387	genotyped
rs12769953	22407656	C	D51 Vitamin B12 deficiency anaemia	0.00022258	0.054144	0.225586	0.2288	0.992394
rs2239633	23589057	G	D51 Vitamin B12 deficiency anaemia	0.00010109	0.29503	0.4838	0.09197	genotyped
rs2290400	38066240	C	D51 Vitamin B12 deficiency anaemia	5.2345e-05	0.58783	0.4891	0.1986	genotyped
rs2390536	21485397	A	D51 Vitamin B12 deficiency anaemia	7.9539e-05	0.42843	0.363622	0.315	0.993467
rs3731249	21970916	C	D51 Vitamin B12 deficiency anaemia	5.9207e-05	0.84242	0.02696	0.473	genotyped
rs3740540	126294167	G	D51 Vitamin B12 deficiency anaemia	-2.0333e-05	0.85177	0.2686	0.6892	genotyped
rs3824662	8104208	A	D51 Vitamin B12 deficiency anaemia	0.00022676	0.077554	0.171996	0.2615	0.988987
rs4617118	130156143	G	D51 Vitamin B12 deficiency anaemia	4.5068e-05	0.72346	0.174868	0.6895	0.989614
rs4762284	96612762	T	D51 Vitamin B12 deficiency anaemia	1.9218e-05	0.85573	0.295513	0.7244	0.997309
rs7089424	63752159	T	D51 Vitamin B12 deficiency anaemia	3.8106e-05	0.70814	0.3416	0.0849	genotyped
rs10741006	22856019	C	D60-D64 Aplastic and other anaemias	-0.00046728	0.20003	0.412258	0.3051	0.987636
rs11978267	50466304	A	D60-D64 Aplastic and other anaemias	0.00012358	0.75728	0.2752	0.9387	genotyped
rs12769953	22407656	C	D60-D64 Aplastic and other anaemias	0.00073247	0.086806	0.225586	0.2288	0.992394
rs2239633	23589057	G	D60-D64 Aplastic and other anaemias	0.00083836	0.018918	0.4838	0.09197	genotyped
rs2290400	38066240	C	D60-D64 Aplastic and other anaemias	-0.00063185	0.077046	0.4891	0.1986	genotyped
rs2390536	21485397	A	D60-D64 Aplastic and other anaemias	0.00033666	0.36513	0.363622	0.315	0.993467
rs3731249	21970916	C	D60-D64 Aplastic and other anaemias	-0.00092373	0.40196	0.02696	0.473	genotyped
rs3740540	126294167	G	D60-D64 Aplastic and other anaemias	1.8131e-05	0.96408	0.2686	0.6892	genotyped
rs3824662	8104208	A	D60-D64 Aplastic and other anaemias	-0.00011653	0.80637	0.171996	0.2615	0.988987
rs4617118	130156143	G	D60-D64 Aplastic and other anaemias	0.00065945	0.16185	0.174868	0.6895	0.989614
rs4762284	96612762	T	D60-D64 Aplastic and other anaemias	5.7502e-05	0.88314	0.295513	0.7244	0.997309
rs7089424	63752159	T	D60-D64 Aplastic and other anaemias	0.0003892	0.30149	0.3416	0.0849	genotyped
rs10741006	22856019	C	D63 Anaemia in chronic diseases classified elsewhere	-1.5038e-05	0.86454	0.412258	0.3051	0.987636
rs11978267	50466304	A	D63 Anaemia in chronic diseases classified elsewhere	-2.6121e-05	0.78698	0.2752	0.9387	genotyped
rs12769953	22407656	C	D63 Anaemia in chronic diseases classified elsewhere	0.00017626	0.088252	0.225586	0.2288	0.992394
rs2239633	23589057	G	D63 Anaemia in chronic diseases classified elsewhere	-6.4629e-05	0.4543	0.4838	0.09197	genotyped
rs2290400	38066240	C	D63 Anaemia in chronic diseases classified elsewhere	-6.1011e-05	0.48014	0.4891	0.1986	genotyped
rs2390536	21485397	A	D63 Anaemia in chronic diseases classified elsewhere	4.8553e-05	0.58899	0.363622	0.315	0.993467
rs3731249	21970916	C	D63 Anaemia in chronic diseases classified elsewhere	-0.00014821	0.57806	0.02696	0.473	genotyped
rs3740540	126294167	G	D63 Anaemia in chronic diseases classified elsewhere	3.4671e-05	0.72169	0.2686	0.6892	genotyped
rs3824662	8104208	A	D63 Anaemia in chronic diseases classified elsewhere	1.4339e-05	0.90071	0.171996	0.2615	0.988987
rs4617118	130156143	G	D63 Anaemia in chronic diseases classified elsewhere	3.1261e-07	0.99781	0.174868	0.6895	0.989614
rs4762284	96612762	T	D63 Anaemia in chronic diseases classified elsewhere	0.0001177	0.21338	0.295513	0.7244	0.997309
rs7089424	63752159	T	D63 Anaemia in chronic diseases classified elsewhere	7.0613e-05	0.43806	0.3416	0.0849	genotyped
rs10741006	22856019	C	D64 Other anaemias	-0.00054155	0.12336	0.412258	0.3051	0.987636
rs11978267	50466304	A	D64 Other anaemias	0.00011326	0.76887	0.2752	0.9387	genotyped
rs12769953	22407656	C	D64 Other anaemias	0.00073401	0.075006	0.225586	0.2288	0.992394
rs2239633	23589057	G	D64 Other anaemias	0.00087941	0.010651	0.4838	0.09197	genotyped
rs2290400	38066240	C	D64 Other anaemias	-0.00065469	0.057376	0.4891	0.1986	genotyped
rs2390536	21485397	A	D64 Other anaemias	0.00038577	0.28164	0.363622	0.315	0.993467
rs3731249	21970916	C	D64 Other anaemias	-0.00054028	0.61105	0.02696	0.473	genotyped
rs3740540	126294167	G	D64 Other anaemias	-1.0403e-05	0.97862	0.2686	0.6892	genotyped
rs3824662	8104208	A	D64 Other anaemias	-6.6256e-06	0.98846	0.171996	0.2615	0.988987
rs4617118	130156143	G	D64 Other anaemias	0.00062255	0.17069	0.174868	0.6895	0.989614
rs4762284	96612762	T	D64 Other anaemias	-1.0412e-05	0.97797	0.295513	0.7244	0.997309
rs7089424	63752159	T	D64 Other anaemias	0.00041649	0.25133	0.3416	0.0849	genotyped
rs10741006	22856019	C	D65-D69 Coagulation defects, purpura and other haemorrhagic conditions	-0.00026153	0.12293	0.412258	0.3051	0.987636
rs11978267	50466304	A	D65-D69 Coagulation defects, purpura and other haemorrhagic conditions	-6.1946e-05	0.73888	0.2752	0.9387	genotyped
rs12769953	22407656	C	D65-D69 Coagulation defects, purpura and other haemorrhagic conditions	6.1807e-05	0.75596	0.225586	0.2288	0.992394
rs2239633	23589057	G	D65-D69 Coagulation defects, purpura and other haemorrhagic conditions	-9.3005e-05	0.5755	0.4838	0.09197	genotyped
rs2290400	38066240	C	D65-D69 Coagulation defects, purpura and other haemorrhagic conditions	8.7623e-05	0.5979	0.4891	0.1986	genotyped
rs2390536	21485397	A	D65-D69 Coagulation defects, purpura and other haemorrhagic conditions	0.00027538	0.11096	0.363622	0.315	0.993467
rs3731249	21970916	C	D65-D69 Coagulation defects, purpura and other haemorrhagic conditions	0.00024405	0.63381	0.02696	0.473	genotyped
rs3740540	126294167	G	D65-D69 Coagulation defects, purpura and other haemorrhagic conditions	7.9507e-06	0.96612	0.2686	0.6892	genotyped
rs3824662	8104208	A	D65-D69 Coagulation defects, purpura and other haemorrhagic conditions	-8.5225e-05	0.69982	0.171996	0.2615	0.988987
rs4617118	130156143	G	D65-D69 Coagulation defects, purpura and other haemorrhagic conditions	-0.00036428	0.096484	0.174868	0.6895	0.989614
rs4762284	96612762	T	D65-D69 Coagulation defects, purpura and other haemorrhagic conditions	2.3838e-05	0.89575	0.295513	0.7244	0.997309
rs7089424	63752159	T	D65-D69 Coagulation defects, purpura and other haemorrhagic conditions	-3.7422e-05	0.8308	0.3416	0.0849	genotyped
rs10741006	22856019	C	D68 Other coagulation defects	-0.0001178	0.24455	0.412258	0.3051	0.987636
rs11978267	50466304	A	D68 Other coagulation defects	-5.5225e-05	0.6187	0.2752	0.9387	genotyped
rs12769953	22407656	C	D68 Other coagulation defects	4.2264e-05	0.7219	0.225586	0.2288	0.992394
rs2239633	23589057	G	D68 Other coagulation defects	-4.0608e-05	0.68208	0.4838	0.09197	genotyped
rs2290400	38066240	C	D68 Other coagulation defects	-8.2246e-06	0.93393	0.4891	0.1986	genotyped
rs2390536	21485397	A	D68 Other coagulation defects	0.00013841	0.17967	0.363622	0.315	0.993467
rs3731249	21970916	C	D68 Other coagulation defects	-5.6755e-05	0.85278	0.02696	0.473	genotyped
rs3740540	126294167	G	D68 Other coagulation defects	-9.3694e-05	0.40195	0.2686	0.6892	genotyped
rs3824662	8104208	A	D68 Other coagulation defects	-0.00018092	0.17047	0.171996	0.2615	0.988987
rs4617118	130156143	G	D68 Other coagulation defects	-8.2118e-05	0.53023	0.174868	0.6895	0.989614
rs4762284	96612762	T	D68 Other coagulation defects	-3.2964e-05	0.76155	0.295513	0.7244	0.997309
rs7089424	63752159	T	D68 Other coagulation defects	4.3144e-05	0.67993	0.3416	0.0849	genotyped
rs10741006	22856019	C	D69 Purpura and other haemorrhagic conditions	-0.00018117	0.18044	0.412258	0.3051	0.987636
rs11978267	50466304	A	D69 Purpura and other haemorrhagic conditions	-6.125e-05	0.6796	0.2752	0.9387	genotyped
rs12769953	22407656	C	D69 Purpura and other haemorrhagic conditions	-1.588e-05	0.92027	0.225586	0.2288	0.992394
rs2239633	23589057	G	D69 Purpura and other haemorrhagic conditions	-6.8113e-05	0.6073	0.4838	0.09197	genotyped
rs2290400	38066240	C	D69 Purpura and other haemorrhagic conditions	8.1506e-05	0.53867	0.4891	0.1986	genotyped
rs2390536	21485397	A	D69 Purpura and other haemorrhagic conditions	0.00015754	0.25318	0.363622	0.315	0.993467
rs3731249	21970916	C	D69 Purpura and other haemorrhagic conditions	0.00019945	0.62564	0.02696	0.473	genotyped
rs3740540	126294167	G	D69 Purpura and other haemorrhagic conditions	0.00011506	0.44109	0.2686	0.6892	genotyped
rs3824662	8104208	A	D69 Purpura and other haemorrhagic conditions	9.6615e-05	0.58379	0.171996	0.2615	0.988987
rs4617118	130156143	G	D69 Purpura and other haemorrhagic conditions	-0.00032466	0.063386	0.174868	0.6895	0.989614
rs4762284	96612762	T	D69 Purpura and other haemorrhagic conditions	9.3556e-05	0.51917	0.295513	0.7244	0.997309
rs7089424	63752159	T	D69 Purpura and other haemorrhagic conditions	-0.00012259	0.38027	0.3416	0.0849	genotyped
rs10741006	22856019	C	D70 Agranulocytosis	-3.7498e-05	0.84218	0.412258	0.3051	0.987636
rs11978267	50466304	A	D70 Agranulocytosis	-0.00024141	0.24242	0.2752	0.9387	genotyped
rs12769953	22407656	C	D70 Agranulocytosis	-4.7821e-05	0.82862	0.225586	0.2288	0.992394
rs2239633	23589057	G	D70 Agranulocytosis	8.4772e-05	0.64597	0.4838	0.09197	genotyped
rs2290400	38066240	C	D70 Agranulocytosis	0.00026744	0.14737	0.4891	0.1986	genotyped
rs2390536	21485397	A	D70 Agranulocytosis	4.0297e-05	0.83375	0.363622	0.315	0.993467
rs3731249	21970916	C	D70 Agranulocytosis	0.00042312	0.45728	0.02696	0.473	genotyped
rs3740540	126294167	G	D70 Agranulocytosis	-0.00029989	0.14929	0.2686	0.6892	genotyped
rs3824662	8104208	A	D70 Agranulocytosis	0.00059906	0.0147	0.171996	0.2615	0.988987
rs4617118	130156143	G	D70 Agranulocytosis	-0.00028204	0.24678	0.174868	0.6895	0.989614
rs4762284	96612762	T	D70 Agranulocytosis	1.5729e-05	0.93797	0.295513	0.7244	0.997309
rs7089424	63752159	T	D70 Agranulocytosis	4.2288e-05	0.82792	0.3416	0.0849	genotyped
rs10741006	22856019	C	D70-D77 Other diseases of blood and blood-forming organs	-0.0001817	0.42017	0.412258	0.3051	0.987636
rs11978267	50466304	A	D70-D77 Other diseases of blood and blood-forming organs	-0.00024777	0.31612	0.2752	0.9387	genotyped
rs12769953	22407656	C	D70-D77 Other diseases of blood and blood-forming organs	-0.00014799	0.57566	0.225586	0.2288	0.992394
rs2239633	23589057	G	D70-D77 Other diseases of blood and blood-forming organs	9.5573e-05	0.66524	0.4838	0.09197	genotyped
rs2290400	38066240	C	D70-D77 Other diseases of blood and blood-forming organs	0.00022428	0.31004	0.4891	0.1986	genotyped
rs2390536	21485397	A	D70-D77 Other diseases of blood and blood-forming organs	5.9283e-05	0.79641	0.363622	0.315	0.993467
rs3731249	21970916	C	D70-D77 Other diseases of blood and blood-forming organs	0.00036023	0.59692	0.02696	0.473	genotyped
rs3740540	126294167	G	D70-D77 Other diseases of blood and blood-forming organs	-0.00039219	0.11509	0.2686	0.6892	genotyped
rs3824662	8104208	A	D70-D77 Other diseases of blood and blood-forming organs	0.00042751	0.14574	0.171996	0.2615	0.988987
rs4617118	130156143	G	D70-D77 Other diseases of blood and blood-forming organs	8.5018e-05	0.77046	0.174868	0.6895	0.989614
rs4762284	96612762	T	D70-D77 Other diseases of blood and blood-forming organs	-0.00020251	0.40245	0.295513	0.7244	0.997309
rs7089424	63752159	T	D70-D77 Other diseases of blood and blood-forming organs	0.00022879	0.32581	0.3416	0.0849	genotyped
rs10741006	22856019	C	D73 Diseases of spleen	2.7382e-05	0.72041	0.412258	0.3051	0.987636
rs11978267	50466304	A	D73 Diseases of spleen	1.1441e-05	0.89158	0.2752	0.9387	genotyped
rs12769953	22407656	C	D73 Diseases of spleen	-0.00012223	0.17316	0.225586	0.2288	0.992394
rs2239633	23589057	G	D73 Diseases of spleen	-1.7698e-05	0.81339	0.4838	0.09197	genotyped
rs2290400	38066240	C	D73 Diseases of spleen	-2.7796e-05	0.71097	0.4891	0.1986	genotyped
rs2390536	21485397	A	D73 Diseases of spleen	3.7806e-05	0.62802	0.363622	0.315	0.993467
rs3731249	21970916	C	D73 Diseases of spleen	-0.00029686	0.19927	0.02696	0.473	genotyped
rs3740540	126294167	G	D73 Diseases of spleen	-1.3718e-05	0.871	0.2686	0.6892	genotyped
rs3824662	8104208	A	D73 Diseases of spleen	-0.00014307	0.15147	0.171996	0.2615	0.988987
rs4617118	130156143	G	D73 Diseases of spleen	9.0492e-05	0.36032	0.174868	0.6895	0.989614
rs4762284	96612762	T	D73 Diseases of spleen	-0.00013969	0.088896	0.295513	0.7244	0.997309
rs7089424	63752159	T	D73 Diseases of spleen	5.7797e-05	0.46456	0.3416	0.0849	genotyped
rs10741006	22856019	C	D75 Other diseases of blood and blood-forming organs	-1.7057e-05	0.83719	0.412258	0.3051	0.987636
rs11978267	50466304	A	D75 Other diseases of blood and blood-forming organs	-0.00011958	0.18896	0.2752	0.9387	genotyped
rs12769953	22407656	C	D75 Other diseases of blood and blood-forming organs	3.8165e-05	0.69507	0.225586	0.2288	0.992394
rs2239633	23589057	G	D75 Other diseases of blood and blood-forming organs	0.00010724	0.1873	0.4838	0.09197	genotyped
rs2290400	38066240	C	D75 Other diseases of blood and blood-forming organs	-0.00012696	0.11865	0.4891	0.1986	genotyped
rs2390536	21485397	A	D75 Other diseases of blood and blood-forming organs	6.4619e-05	0.44512	0.363622	0.315	0.993467
rs3731249	21970916	C	D75 Other diseases of blood and blood-forming organs	9.4287e-05	0.70703	0.02696	0.473	genotyped
rs3740540	126294167	G	D75 Other diseases of blood and blood-forming organs	-6.363e-06	0.94466	0.2686	0.6892	genotyped
rs3824662	8104208	A	D75 Other diseases of blood and blood-forming organs	7.3732e-05	0.49568	0.171996	0.2615	0.988987
rs4617118	130156143	G	D75 Other diseases of blood and blood-forming organs	0.00013961	0.19325	0.174868	0.6895	0.989614
rs4762284	96612762	T	D75 Other diseases of blood and blood-forming organs	-6.3785e-05	0.47404	0.295513	0.7244	0.997309
rs7089424	63752159	T	D75 Other diseases of blood and blood-forming organs	4.3499e-05	0.61194	0.3416	0.0849	genotyped
rs10741006	22856019	C	D80-D89 Certain disorders involving the immune mechanism	0.00015496	0.14982	0.412258	0.3051	0.987636
rs11978267	50466304	A	D80-D89 Certain disorders involving the immune mechanism	2.9946e-05	0.79962	0.2752	0.9387	genotyped
rs12769953	22407656	C	D80-D89 Certain disorders involving the immune mechanism	-6.5528e-05	0.60362	0.225586	0.2288	0.992394
rs2239633	23589057	G	D80-D89 Certain disorders involving the immune mechanism	8.9304e-06	0.93248	0.4838	0.09197	genotyped
rs2290400	38066240	C	D80-D89 Certain disorders involving the immune mechanism	-0.00019347	0.066625	0.4891	0.1986	genotyped
rs2390536	21485397	A	D80-D89 Certain disorders involving the immune mechanism	-7.2233e-05	0.51015	0.363622	0.315	0.993467
rs3731249	21970916	C	D80-D89 Certain disorders involving the immune mechanism	-0.00020976	0.51887	0.02696	0.473	genotyped
rs3740540	126294167	G	D80-D89 Certain disorders involving the immune mechanism	6.6493e-06	0.95537	0.2686	0.6892	genotyped
rs3824662	8104208	A	D80-D89 Certain disorders involving the immune mechanism	9.5602e-05	0.49556	0.171996	0.2615	0.988987
rs4617118	130156143	G	D80-D89 Certain disorders involving the immune mechanism	-0.00023969	0.084836	0.174868	0.6895	0.989614
rs4762284	96612762	T	D80-D89 Certain disorders involving the immune mechanism	1.4672e-06	0.98986	0.295513	0.7244	0.997309
rs7089424	63752159	T	D80-D89 Certain disorders involving the immune mechanism	-7.0164e-05	0.52787	0.3416	0.0849	genotyped
rs10741006	22856019	C	D86 Sarcoidosis	7.1206e-05	0.35423	0.412258	0.3051	0.987636
rs11978267	50466304	A	D86 Sarcoidosis	-4.4845e-06	0.95756	0.2752	0.9387	genotyped
rs12769953	22407656	C	D86 Sarcoidosis	7.537e-05	0.40316	0.225586	0.2288	0.992394
rs2239633	23589057	G	D86 Sarcoidosis	-4.2113e-05	0.57597	0.4838	0.09197	genotyped
rs2290400	38066240	C	D86 Sarcoidosis	-0.00015039	0.045911	0.4891	0.1986	genotyped
rs2390536	21485397	A	D86 Sarcoidosis	-1.2191e-05	0.87634	0.363622	0.315	0.993467
rs3731249	21970916	C	D86 Sarcoidosis	-9.9718e-05	0.66766	0.02696	0.473	genotyped
rs3740540	126294167	G	D86 Sarcoidosis	8.6283e-05	0.30934	0.2686	0.6892	genotyped
rs3824662	8104208	A	D86 Sarcoidosis	6.5635e-05	0.51249	0.171996	0.2615	0.988987
rs4617118	130156143	G	D86 Sarcoidosis	-0.00014902	0.13352	0.174868	0.6895	0.989614
rs4762284	96612762	T	D86 Sarcoidosis	-1.286e-05	0.87608	0.295513	0.7244	0.997309
rs7089424	63752159	T	D86 Sarcoidosis	-2.9405e-05	0.71113	0.3416	0.0849	genotyped
rs10741006	22856019	C	deep venous thrombosis (dvt)	-0.00044822	0.1303	0.412258	0.3051	0.987636
rs11978267	50466304	A	deep venous thrombosis (dvt)	2.4935e-05	0.93878	0.2752	0.9387	genotyped
rs12769953	22407656	C	deep venous thrombosis (dvt)	0.00070236	0.043267	0.225586	0.2288	0.992394
rs2239633	23589057	G	deep venous thrombosis (dvt)	7.1129e-05	0.80624	0.4838	0.09197	genotyped
rs2290400	38066240	C	deep venous thrombosis (dvt)	-0.00020983	0.46961	0.4891	0.1986	genotyped
rs2390536	21485397	A	deep venous thrombosis (dvt)	-0.00049062	0.10404	0.363622	0.315	0.993467
rs3731249	21970916	C	deep venous thrombosis (dvt)	0.00070979	0.42867	0.02696	0.473	genotyped
rs3740540	126294167	G	deep venous thrombosis (dvt)	0.00011909	0.71582	0.2686	0.6892	genotyped
rs3824662	8104208	A	deep venous thrombosis (dvt)	-0.00019915	0.60615	0.171996	0.2615	0.988987
rs4617118	130156143	G	deep venous thrombosis (dvt)	-0.00046562	0.22396	0.174868	0.6895	0.989614
rs4762284	96612762	T	deep venous thrombosis (dvt)	-6.7944e-05	0.83072	0.295513	0.7244	0.997309
rs7089424	63752159	T	deep venous thrombosis (dvt)	-0.00016431	0.59135	0.3416	0.0849	genotyped
rs10741006	22856019	C	depression	0.0011402	0.020188	0.412258	0.3051	0.987636
rs11978267	50466304	A	depression	7.9084e-05	0.88325	0.2752	0.9387	genotyped
rs12769953	22407656	C	depression	0.00017774	0.75755	0.225586	0.2288	0.992394
rs2239633	23589057	G	depression	-0.00094121	0.050328	0.4838	0.09197	genotyped
rs2290400	38066240	C	depression	-0.00068719	0.15323	0.4891	0.1986	genotyped
rs2390536	21485397	A	depression	-0.0021205	2.2816e-05	0.363622	0.315	0.993467
rs3731249	21970916	C	depression	-0.00067441	0.64951	0.02696	0.473	genotyped
rs3740540	126294167	G	depression	0.00024014	0.65774	0.2686	0.6892	genotyped
rs3824662	8104208	A	depression	0.0005849	0.36076	0.171996	0.2615	0.988987
rs4617118	130156143	G	depression	0.00027008	0.67048	0.174868	0.6895	0.989614
rs4762284	96612762	T	depression	0.0011858	0.024449	0.295513	0.7244	0.997309
rs7089424	63752159	T	depression	0.00093833	0.064236	0.3416	0.0849	genotyped
rs10741006	22856019	C	dermatology	-0.00024387	0.56421	0.412258	0.3051	0.987636
rs11978267	50466304	A	dermatology	-0.00029854	0.51973	0.2752	0.9387	genotyped
rs12769953	22407656	C	dermatology	0.00052722	0.2879	0.225586	0.2288	0.992394
rs2239633	23589057	G	dermatology	8.3587e-05	0.84014	0.4838	0.09197	genotyped
rs2290400	38066240	C	dermatology	0.00054115	0.19168	0.4891	0.1986	genotyped
rs2390536	21485397	A	dermatology	-0.00040428	0.34839	0.363622	0.315	0.993467
rs3731249	21970916	C	dermatology	0.0011013	0.38889	0.02696	0.473	genotyped
rs3740540	126294167	G	dermatology	0.00023093	0.62097	0.2686	0.6892	genotyped
rs3824662	8104208	A	dermatology	-0.00084967	0.12335	0.171996	0.2615	0.988987
rs4617118	130156143	G	dermatology	0.00041345	0.44969	0.174868	0.6895	0.989614
rs4762284	96612762	T	dermatology	0.00021266	0.63944	0.295513	0.7244	0.997309
rs7089424	63752159	T	dermatology	0.00046194	0.29036	0.3416	0.0849	genotyped
rs10741006	22856019	C	diabetes	-0.00040685	0.34142	0.412258	0.3051	0.987636
rs11978267	50466304	A	diabetes	-0.00045005	0.33655	0.2752	0.9387	genotyped
rs12769953	22407656	C	diabetes	0.00034762	0.48831	0.225586	0.2288	0.992394
rs2239633	23589057	G	diabetes	0.00035171	0.39981	0.4838	0.09197	genotyped
rs2290400	38066240	C	diabetes	-0.00083511	0.045719	0.4891	0.1986	genotyped
rs2390536	21485397	A	diabetes	0.00017537	0.68709	0.363622	0.315	0.993467
rs3731249	21970916	C	diabetes	0.0011346	0.37918	0.02696	0.473	genotyped
rs3740540	126294167	G	diabetes	-6.0381e-05	0.89826	0.2686	0.6892	genotyped
rs3824662	8104208	A	diabetes	0.0020864	0.00018247	0.171996	0.2615	0.988987
rs4617118	130156143	G	diabetes	-6.2615e-06	0.99094	0.174868	0.6895	0.989614
rs4762284	96612762	T	diabetes	0.0001828	0.68971	0.295513	0.7244	0.997309
rs7089424	63752159	T	diabetes	-0.00033433	0.44916	0.3416	0.0849	genotyped
rs10741006	22856019	C	diabetic eye disease	-0.00025478	0.0059834	0.412258	0.3051	0.987636
rs11978267	50466304	A	diabetic eye disease	-2.8416e-05	0.77976	0.2752	0.9387	genotyped
rs12769953	22407656	C	diabetic eye disease	7.7496e-05	0.47599	0.225586	0.2288	0.992394
rs2239633	23589057	G	diabetic eye disease	-6.9311e-05	0.4452	0.4838	0.09197	genotyped
rs2290400	38066240	C	diabetic eye disease	0.00015986	0.078408	0.4891	0.1986	genotyped
rs2390536	21485397	A	diabetic eye disease	-0.00026593	0.0048774	0.363622	0.315	0.993467
rs3731249	21970916	C	diabetic eye disease	0.000217	0.43857	0.02696	0.473	genotyped
rs3740540	126294167	G	diabetic eye disease	-0.00015669	0.1258	0.2686	0.6892	genotyped
rs3824662	8104208	A	diabetic eye disease	6.1549e-05	0.61054	0.171996	0.2615	0.988987
rs4617118	130156143	G	diabetic eye disease	-4.2755e-05	0.7212	0.174868	0.6895	0.989614
rs4762284	96612762	T	diabetic eye disease	8.4426e-05	0.3959	0.295513	0.7244	0.997309
rs7089424	63752159	T	diabetic eye disease	1.9715e-05	0.83687	0.3416	0.0849	genotyped
rs10741006	22856019	C	disc problem	0.00012195	0.67603	0.412258	0.3051	0.987636
rs11978267	50466304	A	disc problem	-2.8847e-05	0.92815	0.2752	0.9387	genotyped
rs12769953	22407656	C	disc problem	-6.2535e-05	0.85504	0.225586	0.2288	0.992394
rs2239633	23589057	G	disc problem	0.00045419	0.11202	0.4838	0.09197	genotyped
rs2290400	38066240	C	disc problem	-8.2322e-05	0.77342	0.4891	0.1986	genotyped
rs2390536	21485397	A	disc problem	0.00023329	0.43277	0.363622	0.315	0.993467
rs3731249	21970916	C	disc problem	5.1001e-05	0.95387	0.02696	0.473	genotyped
rs3740540	126294167	G	disc problem	-0.00046392	0.14996	0.2686	0.6892	genotyped
rs3824662	8104208	A	disc problem	0.00036208	0.34128	0.171996	0.2615	0.988987
rs4617118	130156143	G	disc problem	-0.00029333	0.43658	0.174868	0.6895	0.989614
rs4762284	96612762	T	disc problem	0.00014703	0.63859	0.295513	0.7244	0.997309
rs7089424	63752159	T	disc problem	-0.00074087	0.013983	0.3416	0.0849	genotyped
rs10741006	22856019	C	disorder or pituitary gland	0.00015855	0.047419	0.412258	0.3051	0.987636
rs11978267	50466304	A	disorder or pituitary gland	0.00013039	0.13717	0.2752	0.9387	genotyped
rs12769953	22407656	C	disorder or pituitary gland	0.00018338	0.050596	0.225586	0.2288	0.992394
rs2239633	23589057	G	disorder or pituitary gland	-3.3628e-05	0.66779	0.4838	0.09197	genotyped
rs2290400	38066240	C	disorder or pituitary gland	-4.2012e-05	0.59202	0.4891	0.1986	genotyped
rs2390536	21485397	A	disorder or pituitary gland	-5.4881e-05	0.50099	0.363622	0.315	0.993467
rs3731249	21970916	C	disorder or pituitary gland	-0.0003079	0.20274	0.02696	0.473	genotyped
rs3740540	126294167	G	disorder or pituitary gland	6.005e-05	0.4965	0.2686	0.6892	genotyped
rs3824662	8104208	A	disorder or pituitary gland	-3.6789e-05	0.72421	0.171996	0.2615	0.988987
rs4617118	130156143	G	disorder or pituitary gland	-4.9269e-06	0.962	0.174868	0.6895	0.989614
rs4762284	96612762	T	disorder or pituitary gland	-2.1019e-05	0.80649	0.295513	0.7244	0.997309
rs7089424	63752159	T	disorder or pituitary gland	7.505e-05	0.36363	0.3416	0.0849	genotyped
rs10741006	22856019	C	diverticular disease/diverticulitis	0.00025301	0.25851	0.412258	0.3051	0.987636
rs11978267	50466304	A	diverticular disease/diverticulitis	-0.00024342	0.32139	0.2752	0.9387	genotyped
rs12769953	22407656	C	diverticular disease/diverticulitis	6.9946e-05	0.79001	0.225586	0.2288	0.992394
rs2239633	23589057	G	diverticular disease/diverticulitis	0.00055876	0.010827	0.4838	0.09197	genotyped
rs2290400	38066240	C	diverticular disease/diverticulitis	-6.3659e-05	0.7718	0.4891	0.1986	genotyped
rs2390536	21485397	A	diverticular disease/diverticulitis	-0.00043756	0.055205	0.363622	0.315	0.993467
rs3731249	21970916	C	diverticular disease/diverticulitis	-0.0005755	0.39506	0.02696	0.473	genotyped
rs3740540	126294167	G	diverticular disease/diverticulitis	-0.0001233	0.61801	0.2686	0.6892	genotyped
rs3824662	8104208	A	diverticular disease/diverticulitis	-0.00048662	0.095552	0.171996	0.2615	0.988987
rs4617118	130156143	G	diverticular disease/diverticulitis	0.00011666	0.68694	0.174868	0.6895	0.989614
rs4762284	96612762	T	diverticular disease/diverticulitis	-0.00031903	0.18413	0.295513	0.7244	0.997309
rs7089424	63752159	T	diverticular disease/diverticulitis	-0.00021007	0.36378	0.3416	0.0849	genotyped
rs10741006	22856019	C	Dried fruit intake	0.0044743	0.13018	0.412258	0.3051	0.987636
rs11978267	50466304	A	Dried fruit intake	-0.0011675	0.71895	0.2752	0.9387	genotyped
rs12769953	22407656	C	Dried fruit intake	-0.0021142	0.54209	0.225586	0.2288	0.992394
rs2239633	23589057	G	Dried fruit intake	0.0031802	0.27208	0.4838	0.09197	genotyped
rs2290400	38066240	C	Dried fruit intake	0.0072106	0.01281	0.4891	0.1986	genotyped
rs2390536	21485397	A	Dried fruit intake	-0.0029443	0.32899	0.363622	0.315	0.993467
rs3731249	21970916	C	Dried fruit intake	-0.0088651	0.32135	0.02696	0.473	genotyped
rs3740540	126294167	G	Dried fruit intake	0.001736	0.5949	0.2686	0.6892	genotyped
rs3824662	8104208	A	Dried fruit intake	-0.002121	0.58214	0.171996	0.2615	0.988987
rs4617118	130156143	G	Dried fruit intake	-0.0025709	0.50131	0.174868	0.6895	0.989614
rs4762284	96612762	T	Dried fruit intake	0.0008457	0.78982	0.295513	0.7244	0.997309
rs7089424	63752159	T	Dried fruit intake	-0.00013639	0.96438	0.3416	0.0849	genotyped
rs10741006	22856019	C	dry eyes	3.4892e-06	0.96574	0.412258	0.3051	0.987636
rs11978267	50466304	A	dry eyes	-0.00017745	0.04635	0.2752	0.9387	genotyped
rs12769953	22407656	C	dry eyes	8.6302e-05	0.36507	0.225586	0.2288	0.992394
rs2239633	23589057	G	dry eyes	6.63e-05	0.40479	0.4838	0.09197	genotyped
rs2290400	38066240	C	dry eyes	3.8348e-05	0.63009	0.4891	0.1986	genotyped
rs2390536	21485397	A	dry eyes	4.859e-05	0.55736	0.363622	0.315	0.993467
rs3731249	21970916	C	dry eyes	0.00012736	0.60396	0.02696	0.473	genotyped
rs3740540	126294167	G	dry eyes	-3.6475e-06	0.96756	0.2686	0.6892	genotyped
rs3824662	8104208	A	dry eyes	-0.00018644	0.078343	0.171996	0.2615	0.988987
rs4617118	130156143	G	dry eyes	-1.8472e-05	0.8604	0.174868	0.6895	0.989614
rs4762284	96612762	T	dry eyes	0.00012299	0.15832	0.295513	0.7244	0.997309
rs7089424	63752159	T	dry eyes	-5.363e-05	0.52274	0.3416	0.0849	genotyped
rs10741006	22856019	C	duodenal ulcer	-5.3574e-05	0.69623	0.412258	0.3051	0.987636
rs11978267	50466304	A	duodenal ulcer	6.7306e-05	0.65461	0.2752	0.9387	genotyped
rs12769953	22407656	C	duodenal ulcer	-3.0891e-05	0.84781	0.225586	0.2288	0.992394
rs2239633	23589057	G	duodenal ulcer	-4.2661e-05	0.75109	0.4838	0.09197	genotyped
rs2290400	38066240	C	duodenal ulcer	-1.405e-05	0.91681	0.4891	0.1986	genotyped
rs2390536	21485397	A	duodenal ulcer	-0.00010411	0.45666	0.363622	0.315	0.993467
rs3731249	21970916	C	duodenal ulcer	9.7298e-05	0.81454	0.02696	0.473	genotyped
rs3740540	126294167	G	duodenal ulcer	-0.00016444	0.27785	0.2686	0.6892	genotyped
rs3824662	8104208	A	duodenal ulcer	-0.00010929	0.5413	0.171996	0.2615	0.988987
rs4617118	130156143	G	duodenal ulcer	0.00031326	0.077508	0.174868	0.6895	0.989614
rs4762284	96612762	T	duodenal ulcer	-0.00013711	0.35178	0.295513	0.7244	0.997309
rs7089424	63752159	T	duodenal ulcer	5.8053e-05	0.68215	0.3416	0.0849	genotyped
rs10741006	22856019	C	dyspepsia / indigestion	-0.00013702	0.070554	0.412258	0.3051	0.987636
rs11978267	50466304	A	dyspepsia / indigestion	2.6295e-05	0.75166	0.2752	0.9387	genotyped
rs12769953	22407656	C	dyspepsia / indigestion	0.00013908	0.11763	0.225586	0.2288	0.992394
rs2239633	23589057	G	dyspepsia / indigestion	-4.9495e-05	0.50501	0.4838	0.09197	genotyped
rs2290400	38066240	C	dyspepsia / indigestion	-8.1614e-06	0.91251	0.4891	0.1986	genotyped
rs2390536	21485397	A	dyspepsia / indigestion	-1.9581e-05	0.79989	0.363622	0.315	0.993467
rs3731249	21970916	C	dyspepsia / indigestion	-0.00047461	0.03825	0.02696	0.473	genotyped
rs3740540	126294167	G	dyspepsia / indigestion	0.00010787	0.19731	0.2686	0.6892	genotyped
rs3824662	8104208	A	dyspepsia / indigestion	-0.00010484	0.28858	0.171996	0.2615	0.988987
rs4617118	130156143	G	dyspepsia / indigestion	-4.0104e-05	0.6823	0.174868	0.6895	0.989614
rs4762284	96612762	T	dyspepsia / indigestion	0.00010051	0.21643	0.295513	0.7244	0.997309
rs7089424	63752159	T	dyspepsia / indigestion	-3.1755e-06	0.96764	0.3416	0.0849	genotyped
rs10741006	22856019	C	E00-E07 Disorders of thyroid gland	-0.0011087	0.0065984	0.412258	0.3051	0.987636
rs11978267	50466304	A	E00-E07 Disorders of thyroid gland	6.863e-05	0.87809	0.2752	0.9387	genotyped
rs12769953	22407656	C	E00-E07 Disorders of thyroid gland	0.00020427	0.66961	0.225586	0.2288	0.992394
rs2239633	23589057	G	E00-E07 Disorders of thyroid gland	-0.00067298	0.092291	0.4838	0.09197	genotyped
rs2290400	38066240	C	E00-E07 Disorders of thyroid gland	-0.00073681	0.065364	0.4891	0.1986	genotyped
rs2390536	21485397	A	E00-E07 Disorders of thyroid gland	2.7232e-05	0.9478	0.363622	0.315	0.993467
rs3731249	21970916	C	E00-E07 Disorders of thyroid gland	0.0016587	0.17902	0.02696	0.473	genotyped
rs3740540	126294167	G	E00-E07 Disorders of thyroid gland	7.015e-05	0.87631	0.2686	0.6892	genotyped
rs3824662	8104208	A	E00-E07 Disorders of thyroid gland	0.00036076	0.49781	0.171996	0.2615	0.988987
rs4617118	130156143	G	E00-E07 Disorders of thyroid gland	0.00076335	0.14791	0.174868	0.6895	0.989614
rs4762284	96612762	T	E00-E07 Disorders of thyroid gland	0.00014333	0.74374	0.295513	0.7244	0.997309
rs7089424	63752159	T	E00-E07 Disorders of thyroid gland	-0.00084477	0.045107	0.3416	0.0849	genotyped
rs10741006	22856019	C	E03 Other hypothyroidism	-0.00078442	0.035619	0.412258	0.3051	0.987636
rs11978267	50466304	A	E03 Other hypothyroidism	7.5966e-05	0.85273	0.2752	0.9387	genotyped
rs12769953	22407656	C	E03 Other hypothyroidism	0.00036187	0.40857	0.225586	0.2288	0.992394
rs2239633	23589057	G	E03 Other hypothyroidism	-0.00042193	0.24857	0.4838	0.09197	genotyped
rs2290400	38066240	C	E03 Other hypothyroidism	-0.00057863	0.11366	0.4891	0.1986	genotyped
rs2390536	21485397	A	E03 Other hypothyroidism	0.00018942	0.61856	0.363622	0.315	0.993467
rs3731249	21970916	C	E03 Other hypothyroidism	0.0009679	0.39127	0.02696	0.473	genotyped
rs3740540	126294167	G	E03 Other hypothyroidism	-2.2064e-05	0.95731	0.2686	0.6892	genotyped
rs3824662	8104208	A	E03 Other hypothyroidism	-8.9265e-06	0.98537	0.171996	0.2615	0.988987
rs4617118	130156143	G	E03 Other hypothyroidism	0.00075487	0.11775	0.174868	0.6895	0.989614
rs4762284	96612762	T	E03 Other hypothyroidism	0.00036969	0.35672	0.295513	0.7244	0.997309
rs7089424	63752159	T	E03 Other hypothyroidism	-0.00083648	0.03007	0.3416	0.0849	genotyped
rs10741006	22856019	C	E04 Other non-toxic goitre	-0.00011432	0.39825	0.412258	0.3051	0.987636
rs11978267	50466304	A	E04 Other non-toxic goitre	5.6703e-06	0.96951	0.2752	0.9387	genotyped
rs12769953	22407656	C	E04 Other non-toxic goitre	-0.00016169	0.30839	0.225586	0.2288	0.992394
rs2239633	23589057	G	E04 Other non-toxic goitre	3.3553e-05	0.80023	0.4838	0.09197	genotyped
rs2290400	38066240	C	E04 Other non-toxic goitre	-0.0001695	0.20127	0.4891	0.1986	genotyped
rs2390536	21485397	A	E04 Other non-toxic goitre	-9.1449e-05	0.50731	0.363622	0.315	0.993467
rs3731249	21970916	C	E04 Other non-toxic goitre	0.0001296	0.75133	0.02696	0.473	genotyped
rs3740540	126294167	G	E04 Other non-toxic goitre	0.00014602	0.32851	0.2686	0.6892	genotyped
rs3824662	8104208	A	E04 Other non-toxic goitre	0.00021309	0.22717	0.171996	0.2615	0.988987
rs4617118	130156143	G	E04 Other non-toxic goitre	5.0493e-06	0.97698	0.174868	0.6895	0.989614
rs4762284	96612762	T	E04 Other non-toxic goitre	-0.00018881	0.19346	0.295513	0.7244	0.997309
rs7089424	63752159	T	E04 Other non-toxic goitre	-4.7922e-05	0.73175	0.3416	0.0849	genotyped
rs10741006	22856019	C	E05 Thyrotoxicosis [hyperthyroidism]	-3.1932e-05	0.82211	0.412258	0.3051	0.987636
rs11978267	50466304	A	E05 Thyrotoxicosis [hyperthyroidism]	-1.1177e-06	0.99427	0.2752	0.9387	genotyped
rs12769953	22407656	C	E05 Thyrotoxicosis [hyperthyroidism]	-7.2327e-05	0.66418	0.225586	0.2288	0.992394
rs2239633	23589057	G	E05 Thyrotoxicosis [hyperthyroidism]	-0.00025199	0.070199	0.4838	0.09197	genotyped
rs2290400	38066240	C	E05 Thyrotoxicosis [hyperthyroidism]	3.6769e-05	0.79164	0.4891	0.1986	genotyped
rs2390536	21485397	A	E05 Thyrotoxicosis [hyperthyroidism]	1.3524e-05	0.92557	0.363622	0.315	0.993467
rs3731249	21970916	C	E05 Thyrotoxicosis [hyperthyroidism]	0.0010623	0.013349	0.02696	0.473	genotyped
rs3740540	126294167	G	E05 Thyrotoxicosis [hyperthyroidism]	-3.8616e-05	0.80551	0.2686	0.6892	genotyped
rs3824662	8104208	A	E05 Thyrotoxicosis [hyperthyroidism]	0.00033959	0.066669	0.171996	0.2615	0.988987
rs4617118	130156143	G	E05 Thyrotoxicosis [hyperthyroidism]	-2.4627e-05	0.89331	0.174868	0.6895	0.989614
rs4762284	96612762	T	E05 Thyrotoxicosis [hyperthyroidism]	-9.955e-05	0.51367	0.295513	0.7244	0.997309
rs7089424	63752159	T	E05 Thyrotoxicosis [hyperthyroidism]	-8.2322e-05	0.57472	0.3416	0.0849	genotyped
rs10741006	22856019	C	E10 Insulin-dependent diabetes mellitus	-0.0002861	0.097626	0.412258	0.3051	0.987636
rs11978267	50466304	A	E10 Insulin-dependent diabetes mellitus	-0.00011417	0.54651	0.2752	0.9387	genotyped
rs12769953	22407656	C	E10 Insulin-dependent diabetes mellitus	-0.00015007	0.45884	0.225586	0.2288	0.992394
rs2239633	23589057	G	E10 Insulin-dependent diabetes mellitus	0.00017932	0.28911	0.4838	0.09197	genotyped
rs2290400	38066240	C	E10 Insulin-dependent diabetes mellitus	-5.0061e-05	0.76737	0.4891	0.1986	genotyped
rs2390536	21485397	A	E10 Insulin-dependent diabetes mellitus	6.2903e-06	0.97149	0.363622	0.315	0.993467
rs3731249	21970916	C	E10 Insulin-dependent diabetes mellitus	0.00015722	0.76318	0.02696	0.473	genotyped
rs3740540	126294167	G	E10 Insulin-dependent diabetes mellitus	-2.7125e-05	0.8869	0.2686	0.6892	genotyped
rs3824662	8104208	A	E10 Insulin-dependent diabetes mellitus	4.8018e-05	0.83114	0.171996	0.2615	0.988987
rs4617118	130156143	G	E10 Insulin-dependent diabetes mellitus	-8.6636e-06	0.96905	0.174868	0.6895	0.989614
rs4762284	96612762	T	E10 Insulin-dependent diabetes mellitus	-0.00023135	0.21185	0.295513	0.7244	0.997309
rs7089424	63752159	T	E10 Insulin-dependent diabetes mellitus	0.00014034	0.43152	0.3416	0.0849	genotyped
rs10741006	22856019	C	E10-E14 Diabetes mellitus	-0.00015544	0.7196	0.412258	0.3051	0.987636
rs11978267	50466304	A	E10-E14 Diabetes mellitus	-0.00040165	0.39698	0.2752	0.9387	genotyped
rs12769953	22407656	C	E10-E14 Diabetes mellitus	0.00097059	0.055986	0.225586	0.2288	0.992394
rs2239633	23589057	G	E10-E14 Diabetes mellitus	0.00066188	0.11788	0.4838	0.09197	genotyped
rs2290400	38066240	C	E10-E14 Diabetes mellitus	-0.00018792	0.65719	0.4891	0.1986	genotyped
rs2390536	21485397	A	E10-E14 Diabetes mellitus	-0.00027475	0.53312	0.363622	0.315	0.993467
rs3731249	21970916	C	E10-E14 Diabetes mellitus	0.0011434	0.3817	0.02696	0.473	genotyped
rs3740540	126294167	G	E10-E14 Diabetes mellitus	-0.00031215	0.51382	0.2686	0.6892	genotyped
rs3824662	8104208	A	E10-E14 Diabetes mellitus	0.00065122	0.24865	0.171996	0.2615	0.988987
rs4617118	130156143	G	E10-E14 Diabetes mellitus	6.1893e-05	0.91177	0.174868	0.6895	0.989614
rs4762284	96612762	T	E10-E14 Diabetes mellitus	0.00014672	0.75175	0.295513	0.7244	0.997309
rs7089424	63752159	T	E10-E14 Diabetes mellitus	-0.00053325	0.23315	0.3416	0.0849	genotyped
rs10741006	22856019	C	E11 Non-insulin-dependent diabetes mellitus	-7.7934e-05	0.85176	0.412258	0.3051	0.987636
rs11978267	50466304	A	E11 Non-insulin-dependent diabetes mellitus	-0.0003588	0.43216	0.2752	0.9387	genotyped
rs12769953	22407656	C	E11 Non-insulin-dependent diabetes mellitus	0.0010011	0.040697	0.225586	0.2288	0.992394
rs2239633	23589057	G	E11 Non-insulin-dependent diabetes mellitus	0.000845	0.038201	0.4838	0.09197	genotyped
rs2290400	38066240	C	E11 Non-insulin-dependent diabetes mellitus	-0.00013112	0.74785	0.4891	0.1986	genotyped
rs2390536	21485397	A	E11 Non-insulin-dependent diabetes mellitus	-0.00023961	0.57258	0.363622	0.315	0.993467
rs3731249	21970916	C	E11 Non-insulin-dependent diabetes mellitus	0.0018382	0.14427	0.02696	0.473	genotyped
rs3740540	126294167	G	E11 Non-insulin-dependent diabetes mellitus	-0.00040005	0.385	0.2686	0.6892	genotyped
rs3824662	8104208	A	E11 Non-insulin-dependent diabetes mellitus	0.00064535	0.23527	0.171996	0.2615	0.988987
rs4617118	130156143	G	E11 Non-insulin-dependent diabetes mellitus	5.7855e-05	0.91438	0.174868	0.6895	0.989614
rs4762284	96612762	T	E11 Non-insulin-dependent diabetes mellitus	0.00045227	0.3114	0.295513	0.7244	0.997309
rs7089424	63752159	T	E11 Non-insulin-dependent diabetes mellitus	-0.00043042	0.31773	0.3416	0.0849	genotyped
rs10741006	22856019	C	E14 Unspecified diabetes mellitus	-0.00014087	0.37666	0.412258	0.3051	0.987636
rs11978267	50466304	A	E14 Unspecified diabetes mellitus	-0.00010564	0.54544	0.2752	0.9387	genotyped
rs12769953	22407656	C	E14 Unspecified diabetes mellitus	0.000135	0.47013	0.225586	0.2288	0.992394
rs2239633	23589057	G	E14 Unspecified diabetes mellitus	0.00020852	0.18168	0.4838	0.09197	genotyped
rs2290400	38066240	C	E14 Unspecified diabetes mellitus	-0.00017009	0.27624	0.4891	0.1986	genotyped
rs2390536	21485397	A	E14 Unspecified diabetes mellitus	-0.00032854	0.043105	0.363622	0.315	0.993467
rs3731249	21970916	C	E14 Unspecified diabetes mellitus	-0.000107	0.82425	0.02696	0.473	genotyped
rs3740540	126294167	G	E14 Unspecified diabetes mellitus	0.00017744	0.31324	0.2686	0.6892	genotyped
rs3824662	8104208	A	E14 Unspecified diabetes mellitus	0.00024089	0.24624	0.171996	0.2615	0.988987
rs4617118	130156143	G	E14 Unspecified diabetes mellitus	0.00011993	0.5605	0.174868	0.6895	0.989614
rs4762284	96612762	T	E14 Unspecified diabetes mellitus	-3.1615e-05	0.85333	0.295513	0.7244	0.997309
rs7089424	63752159	T	E14 Unspecified diabetes mellitus	-0.00020984	0.20236	0.3416	0.0849	genotyped
rs10741006	22856019	C	E15-E16 Other disorders of glucose regulation and pancreatic internal secretion	-0.00018429	0.068446	0.412258	0.3051	0.987636
rs11978267	50466304	A	E15-E16 Other disorders of glucose regulation and pancreatic internal secretion	-8.2929e-05	0.45453	0.2752	0.9387	genotyped
rs12769953	22407656	C	E15-E16 Other disorders of glucose regulation and pancreatic internal secretion	8.5009e-05	0.47367	0.225586	0.2288	0.992394
rs2239633	23589057	G	E15-E16 Other disorders of glucose regulation and pancreatic internal secretion	0.00020124	0.042291	0.4838	0.09197	genotyped
rs2290400	38066240	C	E15-E16 Other disorders of glucose regulation and pancreatic internal secretion	-9.289e-05	0.34879	0.4891	0.1986	genotyped
rs2390536	21485397	A	E15-E16 Other disorders of glucose regulation and pancreatic internal secretion	7.0659e-05	0.49306	0.363622	0.315	0.993467
rs3731249	21970916	C	E15-E16 Other disorders of glucose regulation and pancreatic internal secretion	0.00049667	0.10423	0.02696	0.473	genotyped
rs3740540	126294167	G	E15-E16 Other disorders of glucose regulation and pancreatic internal secretion	-6.1814e-05	0.57995	0.2686	0.6892	genotyped
rs3824662	8104208	A	E15-E16 Other disorders of glucose regulation and pancreatic internal secretion	-6.8847e-05	0.60162	0.171996	0.2615	0.988987
rs4617118	130156143	G	E15-E16 Other disorders of glucose regulation and pancreatic internal secretion	-3.8533e-05	0.76821	0.174868	0.6895	0.989614
rs4762284	96612762	T	E15-E16 Other disorders of glucose regulation and pancreatic internal secretion	-3.6057e-05	0.73975	0.295513	0.7244	0.997309
rs7089424	63752159	T	E15-E16 Other disorders of glucose regulation and pancreatic internal secretion	-3.0879e-05	0.76758	0.3416	0.0849	genotyped
rs10741006	22856019	C	E16 Other disorders of pancreatic internal secretion	-0.00018625	0.065145	0.412258	0.3051	0.987636
rs11978267	50466304	A	E16 Other disorders of pancreatic internal secretion	-7.5419e-05	0.49575	0.2752	0.9387	genotyped
rs12769953	22407656	C	E16 Other disorders of pancreatic internal secretion	8.0946e-05	0.4944	0.225586	0.2288	0.992394
rs2239633	23589057	G	E16 Other disorders of pancreatic internal secretion	0.0001975	0.045943	0.4838	0.09197	genotyped
rs2290400	38066240	C	E16 Other disorders of pancreatic internal secretion	-9.7122e-05	0.32653	0.4891	0.1986	genotyped
rs2390536	21485397	A	E16 Other disorders of pancreatic internal secretion	7.1407e-05	0.48784	0.363622	0.315	0.993467
rs3731249	21970916	C	E16 Other disorders of pancreatic internal secretion	0.00048907	0.1091	0.02696	0.473	genotyped
rs3740540	126294167	G	E16 Other disorders of pancreatic internal secretion	-5.3867e-05	0.62906	0.2686	0.6892	genotyped
rs3824662	8104208	A	E16 Other disorders of pancreatic internal secretion	-6.0965e-05	0.64335	0.171996	0.2615	0.988987
rs4617118	130156143	G	E16 Other disorders of pancreatic internal secretion	-3.8512e-05	0.76798	0.174868	0.6895	0.989614
rs4762284	96612762	T	E16 Other disorders of pancreatic internal secretion	-3.1812e-05	0.76912	0.295513	0.7244	0.997309
rs7089424	63752159	T	E16 Other disorders of pancreatic internal secretion	-1.6436e-05	0.87481	0.3416	0.0849	genotyped
rs10741006	22856019	C	E20-E35 Disorders of other endocrine glands	8.7099e-05	0.60342	0.412258	0.3051	0.987636
rs11978267	50466304	A	E20-E35 Disorders of other endocrine glands	-0.00026921	0.14317	0.2752	0.9387	genotyped
rs12769953	22407656	C	E20-E35 Disorders of other endocrine glands	0.00051128	0.0093283	0.225586	0.2288	0.992394
rs2239633	23589057	G	E20-E35 Disorders of other endocrine glands	0.00016846	0.30517	0.4838	0.09197	genotyped
rs2290400	38066240	C	E20-E35 Disorders of other endocrine glands	0.00018806	0.25253	0.4891	0.1986	genotyped
rs2390536	21485397	A	E20-E35 Disorders of other endocrine glands	-0.00017141	0.31597	0.363622	0.315	0.993467
rs3731249	21970916	C	E20-E35 Disorders of other endocrine glands	0.0002844	0.57461	0.02696	0.473	genotyped
rs3740540	126294167	G	E20-E35 Disorders of other endocrine glands	8.3456e-05	0.65215	0.2686	0.6892	genotyped
rs3824662	8104208	A	E20-E35 Disorders of other endocrine glands	0.00012487	0.56784	0.171996	0.2615	0.988987
rs4617118	130156143	G	E20-E35 Disorders of other endocrine glands	-8.4846e-05	0.69556	0.174868	0.6895	0.989614
rs4762284	96612762	T	E20-E35 Disorders of other endocrine glands	8.825e-05	0.62384	0.295513	0.7244	0.997309
rs7089424	63752159	T	E20-E35 Disorders of other endocrine glands	2.7332e-05	0.8746	0.3416	0.0849	genotyped
rs10741006	22856019	C	E21 Hyperparathyroidism and other disorders of parathyroid gland	-9.4501e-05	0.31695	0.412258	0.3051	0.987636
rs11978267	50466304	A	E21 Hyperparathyroidism and other disorders of parathyroid gland	-4.894e-05	0.63653	0.2752	0.9387	genotyped
rs12769953	22407656	C	E21 Hyperparathyroidism and other disorders of parathyroid gland	0.00029505	0.0077272	0.225586	0.2288	0.992394
rs2239633	23589057	G	E21 Hyperparathyroidism and other disorders of parathyroid gland	0.00017195	0.06315	0.4838	0.09197	genotyped
rs2290400	38066240	C	E21 Hyperparathyroidism and other disorders of parathyroid gland	2.1797e-05	0.81384	0.4891	0.1986	genotyped
rs2390536	21485397	A	E21 Hyperparathyroidism and other disorders of parathyroid gland	-0.00024602	0.010612	0.363622	0.315	0.993467
rs3731249	21970916	C	E21 Hyperparathyroidism and other disorders of parathyroid gland	0.00037846	0.18486	0.02696	0.473	genotyped
rs3740540	126294167	G	E21 Hyperparathyroidism and other disorders of parathyroid gland	4.0225e-05	0.69967	0.2686	0.6892	genotyped
rs3824662	8104208	A	E21 Hyperparathyroidism and other disorders of parathyroid gland	-6.0185e-06	0.96101	0.171996	0.2615	0.988987
rs4617118	130156143	G	E21 Hyperparathyroidism and other disorders of parathyroid gland	9.5463e-06	0.93767	0.174868	0.6895	0.989614
rs4762284	96612762	T	E21 Hyperparathyroidism and other disorders of parathyroid gland	0.00021287	0.035654	0.295513	0.7244	0.997309
rs7089424	63752159	T	E21 Hyperparathyroidism and other disorders of parathyroid gland	-3.4875e-05	0.7207	0.3416	0.0849	genotyped
rs10741006	22856019	C	E27 Other disorders of adrenal gland	-5.1495e-05	0.47334	0.412258	0.3051	0.987636
rs11978267	50466304	A	E27 Other disorders of adrenal gland	-9.3627e-05	0.23445	0.2752	0.9387	genotyped
rs12769953	22407656	C	E27 Other disorders of adrenal gland	6.35e-06	0.93991	0.225586	0.2288	0.992394
rs2239633	23589057	G	E27 Other disorders of adrenal gland	4.3833e-05	0.53336	0.4838	0.09197	genotyped
rs2290400	38066240	C	E27 Other disorders of adrenal gland	2.2656e-05	0.74759	0.4891	0.1986	genotyped
rs2390536	21485397	A	E27 Other disorders of adrenal gland	-7.7254e-06	0.91596	0.363622	0.315	0.993467
rs3731249	21970916	C	E27 Other disorders of adrenal gland	0.00025666	0.23698	0.02696	0.473	genotyped
rs3740540	126294167	G	E27 Other disorders of adrenal gland	3.9881e-05	0.61503	0.2686	0.6892	genotyped
rs3824662	8104208	A	E27 Other disorders of adrenal gland	8.8542e-05	0.34432	0.171996	0.2615	0.988987
rs4617118	130156143	G	E27 Other disorders of adrenal gland	3.0792e-05	0.7402	0.174868	0.6895	0.989614
rs4762284	96612762	T	E27 Other disorders of adrenal gland	1.94e-05	0.80125	0.295513	0.7244	0.997309
rs7089424	63752159	T	E27 Other disorders of adrenal gland	1.2573e-06	0.98648	0.3416	0.0849	genotyped
rs10741006	22856019	C	E50-E64 Other nutritional deficiencies	-0.00018531	0.13479	0.412258	0.3051	0.987636
rs11978267	50466304	A	E50-E64 Other nutritional deficiencies	5.2766e-06	0.96902	0.2752	0.9387	genotyped
rs12769953	22407656	C	E50-E64 Other nutritional deficiencies	0.00025729	0.076705	0.225586	0.2288	0.992394
rs2239633	23589057	G	E50-E64 Other nutritional deficiencies	9.1918e-05	0.44893	0.4838	0.09197	genotyped
rs2290400	38066240	C	E50-E64 Other nutritional deficiencies	-2.1858e-06	0.98564	0.4891	0.1986	genotyped
rs2390536	21485397	A	E50-E64 Other nutritional deficiencies	2.023e-05	0.87276	0.363622	0.315	0.993467
rs3731249	21970916	C	E50-E64 Other nutritional deficiencies	0.00011752	0.75363	0.02696	0.473	genotyped
rs3740540	126294167	G	E50-E64 Other nutritional deficiencies	9.9046e-05	0.46915	0.2686	0.6892	genotyped
rs3824662	8104208	A	E50-E64 Other nutritional deficiencies	-6.9874e-05	0.66538	0.171996	0.2615	0.988987
rs4617118	130156143	G	E50-E64 Other nutritional deficiencies	0.000205	0.20068	0.174868	0.6895	0.989614
rs4762284	96612762	T	E50-E64 Other nutritional deficiencies	-8.6069e-06	0.94838	0.295513	0.7244	0.997309
rs7089424	63752159	T	E50-E64 Other nutritional deficiencies	2.5229e-05	0.84375	0.3416	0.0849	genotyped
rs10741006	22856019	C	E53 Deficiency of other B group vitamins	-8.5741e-06	0.92423	0.412258	0.3051	0.987636
rs11978267	50466304	A	E53 Deficiency of other B group vitamins	-7.4084e-05	0.45366	0.2752	0.9387	genotyped
rs12769953	22407656	C	E53 Deficiency of other B group vitamins	0.00010703	0.31145	0.225586	0.2288	0.992394
rs2239633	23589057	G	E53 Deficiency of other B group vitamins	0.00010174	0.24946	0.4838	0.09197	genotyped
rs2290400	38066240	C	E53 Deficiency of other B group vitamins	5.7514e-06	0.94809	0.4891	0.1986	genotyped
rs2390536	21485397	A	E53 Deficiency of other B group vitamins	5.7131e-05	0.53422	0.363622	0.315	0.993467
rs3731249	21970916	C	E53 Deficiency of other B group vitamins	6.8063e-05	0.80276	0.02696	0.473	genotyped
rs3740540	126294167	G	E53 Deficiency of other B group vitamins	7.3387e-05	0.46098	0.2686	0.6892	genotyped
rs3824662	8104208	A	E53 Deficiency of other B group vitamins	-8.9876e-05	0.44446	0.171996	0.2615	0.988987
rs4617118	130156143	G	E53 Deficiency of other B group vitamins	0.0001599	0.17001	0.174868	0.6895	0.989614
rs4762284	96612762	T	E53 Deficiency of other B group vitamins	8.9621e-05	0.35425	0.295513	0.7244	0.997309
rs7089424	63752159	T	E53 Deficiency of other B group vitamins	1.0623e-05	0.90918	0.3416	0.0849	genotyped
rs10741006	22856019	C	E65-E68 Obesity and other hyperalimentation	-0.00014527	0.6645	0.412258	0.3051	0.987636
rs11978267	50466304	A	E65-E68 Obesity and other hyperalimentation	-0.0010217	0.0054239	0.2752	0.9387	genotyped
rs12769953	22407656	C	E65-E68 Obesity and other hyperalimentation	0.00067607	0.085295	0.225586	0.2288	0.992394
rs2239633	23589057	G	E65-E68 Obesity and other hyperalimentation	0.0002789	0.39514	0.4838	0.09197	genotyped
rs2290400	38066240	C	E65-E68 Obesity and other hyperalimentation	-0.00051858	0.11408	0.4891	0.1986	genotyped
rs2390536	21485397	A	E65-E68 Obesity and other hyperalimentation	-0.00030845	0.36655	0.363622	0.315	0.993467
rs3731249	21970916	C	E65-E68 Obesity and other hyperalimentation	-0.0030622	0.0024754	0.02696	0.473	genotyped
rs3740540	126294167	G	E65-E68 Obesity and other hyperalimentation	1.5334e-05	0.96693	0.2686	0.6892	genotyped
rs3824662	8104208	A	E65-E68 Obesity and other hyperalimentation	-0.00015276	0.72648	0.171996	0.2615	0.988987
rs4617118	130156143	G	E65-E68 Obesity and other hyperalimentation	-0.00029685	0.49305	0.174868	0.6895	0.989614
rs4762284	96612762	T	E65-E68 Obesity and other hyperalimentation	-0.00016651	0.64311	0.295513	0.7244	0.997309
rs7089424	63752159	T	E65-E68 Obesity and other hyperalimentation	-0.00063755	0.065384	0.3416	0.0849	genotyped
rs10741006	22856019	C	E66 Obesity	-0.00013755	0.68047	0.412258	0.3051	0.987636
rs11978267	50466304	A	E66 Obesity	-0.001011	0.0057898	0.2752	0.9387	genotyped
rs12769953	22407656	C	E66 Obesity	0.00071994	0.066121	0.225586	0.2288	0.992394
rs2239633	23589057	G	E66 Obesity	0.00031425	0.33664	0.4838	0.09197	genotyped
rs2290400	38066240	C	E66 Obesity	-0.00050381	0.1237	0.4891	0.1986	genotyped
rs2390536	21485397	A	E66 Obesity	-0.00030568	0.36949	0.363622	0.315	0.993467
rs3731249	21970916	C	E66 Obesity	-0.0030579	0.0024397	0.02696	0.473	genotyped
rs3740540	126294167	G	E66 Obesity	8.2537e-06	0.98215	0.2686	0.6892	genotyped
rs3824662	8104208	A	E66 Obesity	-0.00014924	0.73183	0.171996	0.2615	0.988987
rs4617118	130156143	G	E66 Obesity	-0.0003304	0.44423	0.174868	0.6895	0.989614
rs4762284	96612762	T	E66 Obesity	-0.00018433	0.60698	0.295513	0.7244	0.997309
rs7089424	63752159	T	E66 Obesity	-0.00058824	0.088216	0.3416	0.0849	genotyped
rs10741006	22856019	C	E70-E90 Metabolic disorders	0.00044398	0.47631	0.412258	0.3051	0.987636
rs11978267	50466304	A	E70-E90 Metabolic disorders	0.00015617	0.81933	0.2752	0.9387	genotyped
rs12769953	22407656	C	E70-E90 Metabolic disorders	0.00043687	0.55017	0.225586	0.2288	0.992394
rs2239633	23589057	G	E70-E90 Metabolic disorders	0.00065373	0.28433	0.4838	0.09197	genotyped
rs2290400	38066240	C	E70-E90 Metabolic disorders	-0.00098484	0.10697	0.4891	0.1986	genotyped
rs2390536	21485397	A	E70-E90 Metabolic disorders	0.001408	0.026756	0.363622	0.315	0.993467
rs3731249	21970916	C	E70-E90 Metabolic disorders	-0.0040257	0.032647	0.02696	0.473	genotyped
rs3740540	126294167	G	E70-E90 Metabolic disorders	-0.00056961	0.40793	0.2686	0.6892	genotyped
rs3824662	8104208	A	E70-E90 Metabolic disorders	0.0022338	0.0059845	0.171996	0.2615	0.988987
rs4617118	130156143	G	E70-E90 Metabolic disorders	0.00072476	0.36894	0.174868	0.6895	0.989614
rs4762284	96612762	T	E70-E90 Metabolic disorders	-0.000355	0.59578	0.295513	0.7244	0.997309
rs7089424	63752159	T	E70-E90 Metabolic disorders	-0.00044134	0.49308	0.3416	0.0849	genotyped
rs10741006	22856019	C	E78 Disorders of lipoprotein metabolism and other lipidaemias	0.00043348	0.44532	0.412258	0.3051	0.987636
rs11978267	50466304	A	E78 Disorders of lipoprotein metabolism and other lipidaemias	0.0001141	0.85475	0.2752	0.9387	genotyped
rs12769953	22407656	C	E78 Disorders of lipoprotein metabolism and other lipidaemias	0.00057929	0.38454	0.225586	0.2288	0.992394
rs2239633	23589057	G	E78 Disorders of lipoprotein metabolism and other lipidaemias	0.00012147	0.82715	0.4838	0.09197	genotyped
rs2290400	38066240	C	E78 Disorders of lipoprotein metabolism and other lipidaemias	-0.00049935	0.36984	0.4891	0.1986	genotyped
rs2390536	21485397	A	E78 Disorders of lipoprotein metabolism and other lipidaemias	0.0016509	0.0043854	0.363622	0.315	0.993467
rs3731249	21970916	C	E78 Disorders of lipoprotein metabolism and other lipidaemias	-0.0042763	0.012786	0.02696	0.473	genotyped
rs3740540	126294167	G	E78 Disorders of lipoprotein metabolism and other lipidaemias	-0.00052574	0.40186	0.2686	0.6892	genotyped
rs3824662	8104208	A	E78 Disorders of lipoprotein metabolism and other lipidaemias	0.0013705	0.064202	0.171996	0.2615	0.988987
rs4617118	130156143	G	E78 Disorders of lipoprotein metabolism and other lipidaemias	0.0010743	0.14398	0.174868	0.6895	0.989614
rs4762284	96612762	T	E78 Disorders of lipoprotein metabolism and other lipidaemias	9.7627e-05	0.87281	0.295513	0.7244	0.997309
rs7089424	63752159	T	E78 Disorders of lipoprotein metabolism and other lipidaemias	-0.00027693	0.6369	0.3416	0.0849	genotyped
rs10741006	22856019	C	E83 Disorders of mineral metabolism	-5.9362e-05	0.69638	0.412258	0.3051	0.987636
rs11978267	50466304	A	E83 Disorders of mineral metabolism	7.8468e-05	0.63812	0.2752	0.9387	genotyped
rs12769953	22407656	C	E83 Disorders of mineral metabolism	-0.00011553	0.51736	0.225586	0.2288	0.992394
rs2239633	23589057	G	E83 Disorders of mineral metabolism	6.4757e-05	0.66392	0.4838	0.09197	genotyped
rs2290400	38066240	C	E83 Disorders of mineral metabolism	-0.00017122	0.25077	0.4891	0.1986	genotyped
rs2390536	21485397	A	E83 Disorders of mineral metabolism	0.00011383	0.46301	0.363622	0.315	0.993467
rs3731249	21970916	C	E83 Disorders of mineral metabolism	-8.0132e-05	0.86163	0.02696	0.473	genotyped
rs3740540	126294167	G	E83 Disorders of mineral metabolism	-0.00012039	0.47357	0.2686	0.6892	genotyped
rs3824662	8104208	A	E83 Disorders of mineral metabolism	0.00019032	0.33727	0.171996	0.2615	0.988987
rs4617118	130156143	G	E83 Disorders of mineral metabolism	-0.00010106	0.60724	0.174868	0.6895	0.989614
rs4762284	96612762	T	E83 Disorders of mineral metabolism	1.788e-05	0.91276	0.295513	0.7244	0.997309
rs7089424	63752159	T	E83 Disorders of mineral metabolism	-0.00014577	0.35364	0.3416	0.0849	genotyped
rs10741006	22856019	C	E86 Volume depletion	-0.00016397	0.35181	0.412258	0.3051	0.987636
rs11978267	50466304	A	E86 Volume depletion	0.00026938	0.16307	0.2752	0.9387	genotyped
rs12769953	22407656	C	E86 Volume depletion	-0.00022632	0.27325	0.225586	0.2288	0.992394
rs2239633	23589057	G	E86 Volume depletion	0.0002371	0.16933	0.4838	0.09197	genotyped
rs2290400	38066240	C	E86 Volume depletion	-0.00010057	0.56012	0.4891	0.1986	genotyped
rs2390536	21485397	A	E86 Volume depletion	-0.00024171	0.17823	0.363622	0.315	0.993467
rs3731249	21970916	C	E86 Volume depletion	0.0001749	0.74247	0.02696	0.473	genotyped
rs3740540	126294167	G	E86 Volume depletion	5.5647e-05	0.77475	0.2686	0.6892	genotyped
rs3824662	8104208	A	E86 Volume depletion	-2.5408e-05	0.91189	0.171996	0.2615	0.988987
rs4617118	130156143	G	E86 Volume depletion	-0.00031602	0.16518	0.174868	0.6895	0.989614
rs4762284	96612762	T	E86 Volume depletion	0.00010945	0.56233	0.295513	0.7244	0.997309
rs7089424	63752159	T	E86 Volume depletion	-0.00010019	0.58181	0.3416	0.0849	genotyped
rs10741006	22856019	C	E87 Other disorders of fluid, electrolyte and acid-base balance	-0.00012096	0.61428	0.412258	0.3051	0.987636
rs11978267	50466304	A	E87 Other disorders of fluid, electrolyte and acid-base balance	6.9797e-05	0.79087	0.2752	0.9387	genotyped
rs12769953	22407656	C	E87 Other disorders of fluid, electrolyte and acid-base balance	-0.00015132	0.59092	0.225586	0.2288	0.992394
rs2239633	23589057	G	E87 Other disorders of fluid, electrolyte and acid-base balance	0.00052612	0.025244	0.4838	0.09197	genotyped
rs2290400	38066240	C	E87 Other disorders of fluid, electrolyte and acid-base balance	-0.0001859	0.42953	0.4891	0.1986	genotyped
rs2390536	21485397	A	E87 Other disorders of fluid, electrolyte and acid-base balance	0.00018531	0.44886	0.363622	0.315	0.993467
rs3731249	21970916	C	E87 Other disorders of fluid, electrolyte and acid-base balance	-5.7762e-05	0.93655	0.02696	0.473	genotyped
rs3740540	126294167	G	E87 Other disorders of fluid, electrolyte and acid-base balance	-9.6149e-05	0.71675	0.2686	0.6892	genotyped
rs3824662	8104208	A	E87 Other disorders of fluid, electrolyte and acid-base balance	0.00034633	0.26838	0.171996	0.2615	0.988987
rs4617118	130156143	G	E87 Other disorders of fluid, electrolyte and acid-base balance	-0.00015747	0.61183	0.174868	0.6895	0.989614
rs4762284	96612762	T	E87 Other disorders of fluid, electrolyte and acid-base balance	-0.00041906	0.10378	0.295513	0.7244	0.997309
rs7089424	63752159	T	E87 Other disorders of fluid, electrolyte and acid-base balance	8.5136e-05	0.7313	0.3416	0.0849	genotyped
rs10741006	22856019	C	E89 Postprocedural endocrine and metabolic disorders, not elsewhere classified	0.0001244	0.30221	0.412258	0.3051	0.987636
rs11978267	50466304	A	E89 Postprocedural endocrine and metabolic disorders, not elsewhere classified	-1.346e-05	0.91892	0.2752	0.9387	genotyped
rs12769953	22407656	C	E89 Postprocedural endocrine and metabolic disorders, not elsewhere classified	-0.00010826	0.44402	0.225586	0.2288	0.992394
rs2239633	23589057	G	E89 Postprocedural endocrine and metabolic disorders, not elsewhere classified	1.0374e-05	0.93003	0.4838	0.09197	genotyped
rs2290400	38066240	C	E89 Postprocedural endocrine and metabolic disorders, not elsewhere classified	2.0024e-05	0.86547	0.4891	0.1986	genotyped
rs2390536	21485397	A	E89 Postprocedural endocrine and metabolic disorders, not elsewhere classified	-0.00022709	0.064698	0.363622	0.315	0.993467
rs3731249	21970916	C	E89 Postprocedural endocrine and metabolic disorders, not elsewhere classified	-0.00019933	0.58439	0.02696	0.473	genotyped
rs3740540	126294167	G	E89 Postprocedural endocrine and metabolic disorders, not elsewhere classified	0.00016639	0.21141	0.2686	0.6892	genotyped
rs3824662	8104208	A	E89 Postprocedural endocrine and metabolic disorders, not elsewhere classified	0.00026323	0.094059	0.171996	0.2615	0.988987
rs4617118	130156143	G	E89 Postprocedural endocrine and metabolic disorders, not elsewhere classified	0.00017388	0.26483	0.174868	0.6895	0.989614
rs4762284	96612762	T	E89 Postprocedural endocrine and metabolic disorders, not elsewhere classified	-0.00031447	0.015124	0.295513	0.7244	0.997309
rs7089424	63752159	T	E89 Postprocedural endocrine and metabolic disorders, not elsewhere classified	-0.00016186	0.19378	0.3416	0.0849	genotyped
rs10741006	22856019	C	ear/vestibular disorder	-2.6989e-05	0.91728	0.412258	0.3051	0.987636
rs11978267	50466304	A	ear/vestibular disorder	-4.4616e-05	0.87556	0.2752	0.9387	genotyped
rs12769953	22407656	C	ear/vestibular disorder	-7.5843e-05	0.80351	0.225586	0.2288	0.992394
rs2239633	23589057	G	ear/vestibular disorder	1.0813e-05	0.96612	0.4838	0.09197	genotyped
rs2290400	38066240	C	ear/vestibular disorder	0.00017839	0.4837	0.4891	0.1986	genotyped
rs2390536	21485397	A	ear/vestibular disorder	9.7505e-05	0.71277	0.363622	0.315	0.993467
rs3731249	21970916	C	ear/vestibular disorder	0.0010745	0.17125	0.02696	0.473	genotyped
rs3740540	126294167	G	ear/vestibular disorder	9.2497e-05	0.74719	0.2686	0.6892	genotyped
rs3824662	8104208	A	ear/vestibular disorder	-1.3456e-05	0.96832	0.171996	0.2615	0.988987
rs4617118	130156143	G	ear/vestibular disorder	-4.353e-05	0.8969	0.174868	0.6895	0.989614
rs4762284	96612762	T	ear/vestibular disorder	0.00014894	0.59323	0.295513	0.7244	0.997309
rs7089424	63752159	T	ear/vestibular disorder	0.00045213	0.092127	0.3416	0.0849	genotyped
rs10741006	22856019	C	Ease of skin tanning	0.0016458	0.33965	0.412258	0.3051	0.987636
rs11978267	50466304	A	Ease of skin tanning	0.0049744	0.0085265	0.2752	0.9387	genotyped
rs12769953	22407656	C	Ease of skin tanning	-0.0017637	0.383	0.225586	0.2288	0.992394
rs2239633	23589057	G	Ease of skin tanning	-0.00094985	0.57335	0.4838	0.09197	genotyped
rs2290400	38066240	C	Ease of skin tanning	0.0042587	0.01159	0.4891	0.1986	genotyped
rs2390536	21485397	A	Ease of skin tanning	-0.00054056	0.75848	0.363622	0.315	0.993467
rs3731249	21970916	C	Ease of skin tanning	-0.0019207	0.7133	0.02696	0.473	genotyped
rs3740540	126294167	G	Ease of skin tanning	-0.00023065	0.90354	0.2686	0.6892	genotyped
rs3824662	8104208	A	Ease of skin tanning	-0.0018295	0.41556	0.171996	0.2615	0.988987
rs4617118	130156143	G	Ease of skin tanning	0.001386	0.53396	0.174868	0.6895	0.989614
rs4762284	96612762	T	Ease of skin tanning	-0.0046192	0.012546	0.295513	0.7244	0.997309
rs7089424	63752159	T	Ease of skin tanning	0.0026973	0.12979	0.3416	0.0849	genotyped
rs10741006	22856019	C	eczema/dermatitis	0.00024483	0.46273	0.412258	0.3051	0.987636
rs11978267	50466304	A	eczema/dermatitis	0.00026626	0.46629	0.2752	0.9387	genotyped
rs12769953	22407656	C	eczema/dermatitis	0.0004636	0.23582	0.225586	0.2288	0.992394
rs2239633	23589057	G	eczema/dermatitis	-0.00011406	0.72693	0.4838	0.09197	genotyped
rs2290400	38066240	C	eczema/dermatitis	0.00026838	0.4115	0.4891	0.1986	genotyped
rs2390536	21485397	A	eczema/dermatitis	-0.00038452	0.25776	0.363622	0.315	0.993467
rs3731249	21970916	C	eczema/dermatitis	0.0011342	0.26023	0.02696	0.473	genotyped
rs3740540	126294167	G	eczema/dermatitis	-6.4324e-05	0.8613	0.2686	0.6892	genotyped
rs3824662	8104208	A	eczema/dermatitis	-0.00054492	0.20998	0.171996	0.2615	0.988987
rs4617118	130156143	G	eczema/dermatitis	0.0002814	0.51399	0.174868	0.6895	0.989614
rs4762284	96612762	T	eczema/dermatitis	0.00033516	0.34881	0.295513	0.7244	0.997309
rs7089424	63752159	T	eczema/dermatitis	0.00069166	0.044606	0.3416	0.0849	genotyped
rs10741006	22856019	C	emphysema/chronic bronchitis	-8.711e-05	0.77739	0.412258	0.3051	0.987636
rs11978267	50466304	A	emphysema/chronic bronchitis	0.00034077	0.31319	0.2752	0.9387	genotyped
rs12769953	22407656	C	emphysema/chronic bronchitis	0.00050854	0.15939	0.225586	0.2288	0.992394
rs2239633	23589057	G	emphysema/chronic bronchitis	0.00036483	0.22702	0.4838	0.09197	genotyped
rs2290400	38066240	C	emphysema/chronic bronchitis	-0.0016017	1.1567e-07	0.4891	0.1986	genotyped
rs2390536	21485397	A	emphysema/chronic bronchitis	-0.00020197	0.52025	0.363622	0.315	0.993467
rs3731249	21970916	C	emphysema/chronic bronchitis	0.00067969	0.46563	0.02696	0.473	genotyped
rs3740540	126294167	G	emphysema/chronic bronchitis	2.6404e-05	0.93814	0.2686	0.6892	genotyped
rs3824662	8104208	A	emphysema/chronic bronchitis	0.00033842	0.39953	0.171996	0.2615	0.988987
rs4617118	130156143	G	emphysema/chronic bronchitis	0.00047698	0.23126	0.174868	0.6895	0.989614
rs4762284	96612762	T	emphysema/chronic bronchitis	0.00014239	0.6668	0.295513	0.7244	0.997309
rs7089424	63752159	T	emphysema/chronic bronchitis	-6.5229e-05	0.83761	0.3416	0.0849	genotyped
rs10741006	22856019	C	ent disorder/not cancer	0.00022752	0.56841	0.412258	0.3051	0.987636
rs11978267	50466304	A	ent disorder/not cancer	-0.00016675	0.70291	0.2752	0.9387	genotyped
rs12769953	22407656	C	ent disorder/not cancer	0.00017291	0.7117	0.225586	0.2288	0.992394
rs2239633	23589057	G	ent disorder/not cancer	4.3572e-05	0.91119	0.4838	0.09197	genotyped
rs2290400	38066240	C	ent disorder/not cancer	-6.4157e-06	0.98691	0.4891	0.1986	genotyped
rs2390536	21485397	A	ent disorder/not cancer	-6.9083e-05	0.86504	0.363622	0.315	0.993467
rs3731249	21970916	C	ent disorder/not cancer	0.0007891	0.51271	0.02696	0.473	genotyped
rs3740540	126294167	G	ent disorder/not cancer	0.00015034	0.73285	0.2686	0.6892	genotyped
rs3824662	8104208	A	ent disorder/not cancer	-5.8422e-05	0.91055	0.171996	0.2615	0.988987
rs4617118	130156143	G	ent disorder/not cancer	7.3022e-05	0.88737	0.174868	0.6895	0.989614
rs4762284	96612762	T	ent disorder/not cancer	0.0010386	0.015233	0.295513	0.7244	0.997309
rs7089424	63752159	T	ent disorder/not cancer	0.00072091	0.080183	0.3416	0.0849	genotyped
rs10741006	22856019	C	Eosinophill count	-4.2063e-05	0.85404	0.412258	0.3051	0.987636
rs11978267	50466304	A	Eosinophill count	-0.00016729	0.50434	0.2752	0.9387	genotyped
rs12769953	22407656	C	Eosinophill count	-0.00018544	0.48928	0.225586	0.2288	0.992394
rs2239633	23589057	G	Eosinophill count	-0.0025492	2.7888e-30	0.4838	0.09197	genotyped
rs2290400	38066240	C	Eosinophill count	-0.0011386	3.492e-07	0.4891	0.1986	genotyped
rs2390536	21485397	A	Eosinophill count	-0.0003931	0.091477	0.363622	0.315	0.993467
rs3731249	21970916	C	Eosinophill count	-0.00039575	0.56665	0.02696	0.473	genotyped
rs3740540	126294167	G	Eosinophill count	-0.00070436	0.0052734	0.2686	0.6892	genotyped
rs3824662	8104208	A	Eosinophill count	0.0025835	4.4419e-18	0.171996	0.2615	0.988987
rs4617118	130156143	G	Eosinophill count	-0.00085312	0.0037845	0.174868	0.6895	0.989614
rs4762284	96612762	T	Eosinophill count	0.00067431	0.0059288	0.295513	0.7244	0.997309
rs7089424	63752159	T	Eosinophill count	4.692e-05	0.84253	0.3416	0.0849	genotyped
rs10741006	22856019	C	Eosinophill percentage	0.002808	0.37625	0.412258	0.3051	0.987636
rs11978267	50466304	A	Eosinophill percentage	-0.0027362	0.43151	0.2752	0.9387	genotyped
rs12769953	22407656	C	Eosinophill percentage	0.00025371	0.94566	0.225586	0.2288	0.992394
rs2239633	23589057	G	Eosinophill percentage	-0.039621	1.5063e-37	0.4838	0.09197	genotyped
rs2290400	38066240	C	Eosinophill percentage	0.014939	1.4808e-06	0.4891	0.1986	genotyped
rs2390536	21485397	A	Eosinophill percentage	-0.0068629	0.033816	0.363622	0.315	0.993467
rs3731249	21970916	C	Eosinophill percentage	-0.010331	0.28124	0.02696	0.473	genotyped
rs3740540	126294167	G	Eosinophill percentage	-0.018719	9.2026e-08	0.2686	0.6892	genotyped
rs3824662	8104208	A	Eosinophill percentage	0.033143	1.1421e-15	0.171996	0.2615	0.988987
rs4617118	130156143	G	Eosinophill percentage	-0.013746	0.00077966	0.174868	0.6895	0.989614
rs4762284	96612762	T	Eosinophill percentage	0.0041814	0.21863	0.295513	0.7244	0.997309
rs7089424	63752159	T	Eosinophill percentage	0.0033047	0.31341	0.3416	0.0849	genotyped
rs10741006	22856019	C	epilepsy	0.00019395	0.31679	0.412258	0.3051	0.987636
rs11978267	50466304	A	epilepsy	-0.00018233	0.39074	0.2752	0.9387	genotyped
rs12769953	22407656	C	epilepsy	6.8677e-05	0.76249	0.225586	0.2288	0.992394
rs2239633	23589057	G	epilepsy	-9.964e-05	0.59949	0.4838	0.09197	genotyped
rs2290400	38066240	C	epilepsy	5.4262e-05	0.77503	0.4891	0.1986	genotyped
rs2390536	21485397	A	epilepsy	4.6014e-06	0.98141	0.363622	0.315	0.993467
[truncated: 7,338 more rows]

## Sheet: S3 Table
Supplementary Table 3. CLL risk variant associations with 778 UK Biobank GeneATLAS phenotypes
Variant	Position	Eff. Allele	Trait	Beta	p-value	MAF	HWE	imp. score
rs10069690	1279790	C	A00-A09 Intestinal infectious diseases	-0.00044007	0.20377	0.2574	0.4474	genotyped
rs10936599	169492101	C	A00-A09 Intestinal infectious diseases	-5.0753e-05	0.88554	0.244	0.1286	genotyped
rs13397985	231091223	T	A00-A09 Intestinal infectious diseases	-0.0011447	0.0031568	0.189	0.3714	genotyped
rs13401811	111616104	A	A00-A09 Intestinal infectious diseases	0.0002845	0.46608	0.184757	0.4785	0.997125
rs1679013	22206987	T	A00-A09 Intestinal infectious diseases	-0.00014272	0.6541	0.460621	0.6164	0.901667
rs17246404	124462661	T	A00-A09 Intestinal infectious diseases	-6.3228e-05	0.85097	0.281925	0.07283	0.99983
rs17483466	111797458	A	A00-A09 Intestinal infectious diseases	0.00010721	0.77592	0.203	0.1932	genotyped
rs210134	33540209	G	A00-A09 Intestinal infectious diseases	-3.2957e-05	0.91966	0.3119	0.8643	genotyped
rs2236256	154478440	A	A00-A09 Intestinal infectious diseases	0.00043391	0.15482	0.455858	0.1429	0.988131
rs2466024	128188019	A	A00-A09 Intestinal infectious diseases	0.00098025	0.0014396	0.411781	0.5124	0.995702
rs2511714	103578874	G	A00-A09 Intestinal infectious diseases	9.3503e-05	0.76342	0.402526	0.8305	0.982624
rs305061	85975659	T	A00-A09 Intestinal infectious diseases	0.00028085	0.37968	0.3395	0.5962	genotyped
rs3769825	202111380	G	A00-A09 Intestinal infectious diseases	-0.00013203	0.66629	0.4289	0.08893	genotyped
rs391525	85944439	A	A00-A09 Intestinal infectious diseases	-0.00034429	0.28278	0.3379	0.1393	genotyped
rs4406737	90759724	G	A00-A09 Intestinal infectious diseases	0.00016836	0.58208	0.4366	0.9501	0.9932
rs4987852	60793921	T	A00-A09 Intestinal infectious diseases	-3.6963e-05	0.95051	0.06935	0.188	genotyped
rs7169431	56340896	G	A00-A09 Intestinal infectious diseases	0.00035595	0.51722	0.0824585	0.4617	1
rs7176508	70018990	G	A00-A09 Intestinal infectious diseases	8.3095e-06	0.97868	0.385	0.8144	genotyped
rs7231647	57628926	A	A00-A09 Intestinal infectious diseases	-2.6975e-05	0.93048	0.416174	5.948e-08	0.974209
rs735665	123361397	G	A00-A09 Intestinal infectious diseases	0.00070482	0.065979	0.1935	0.5965	genotyped
rs73718779	2969278	C	A00-A09 Intestinal infectious diseases	1.3277e-05	0.97872	0.1042	0.0001314	genotyped
rs757978	242371101	C	A00-A09 Intestinal infectious diseases	0.00031513	0.51801	0.1079	0.8308	genotyped
rs7944004	2311152	G	A00-A09 Intestinal infectious diseases	-0.00067225	0.028039	0.495364	0.1036	0.972788
rs8024033	40403657	G	A00-A09 Intestinal infectious diseases	-0.00021294	0.4837	0.497166	0.6465	0.986833
rs872071	411064	G	A00-A09 Intestinal infectious diseases	0.00012114	0.6886	0.4714	0.002756	genotyped
rs898518	109016824	A	A00-A09 Intestinal infectious diseases	0.00012472	0.68469	0.420442	0.6663	0.9953
rs9273012	32611641	G	A00-A09 Intestinal infectious diseases	0.00018509	0.60835	0.247394	7.827e-08	0.931867
rs9273363	32626272	C	A00-A09 Intestinal infectious diseases	2.8169e-05	0.93202	0.3017	0.008396	genotyped
rs9308731	111908262	A	A00-A09 Intestinal infectious diseases	-0.0004844	0.11182	0.451626	0.8251	0.992825
rs9815073	188115682	A	A00-A09 Intestinal infectious diseases	-0.00014222	0.66789	0.343033	0.6382	0.920506
rs9880772	27777779	A	A00-A09 Intestinal infectious diseases	0.00053321	0.079727	0.45231	0.2082	0.993472
rs10069690	1279790	C	A04 Other bacterial intestinal infections	0.00019674	0.29972	0.2574	0.4474	genotyped
rs10936599	169492101	C	A04 Other bacterial intestinal infections	-2.2367e-05	0.90782	0.244	0.1286	genotyped
rs13397985	231091223	T	A04 Other bacterial intestinal infections	-0.00028297	0.18303	0.189	0.3714	genotyped
rs13401811	111616104	A	A04 Other bacterial intestinal infections	0.00030398	0.15531	0.184757	0.4785	0.997125
rs1679013	22206987	T	A04 Other bacterial intestinal infections	0.00016458	0.34572	0.460621	0.6164	0.901667
rs17246404	124462661	T	A04 Other bacterial intestinal infections	8.6959e-05	0.63729	0.281925	0.07283	0.99983
rs17483466	111797458	A	A04 Other bacterial intestinal infections	0.00026958	0.19158	0.203	0.1932	genotyped
rs210134	33540209	G	A04 Other bacterial intestinal infections	2.0528e-05	0.90877	0.3119	0.8643	genotyped
rs2236256	154478440	A	A04 Other bacterial intestinal infections	5.6915e-06	0.97285	0.455858	0.1429	0.988131
rs2466024	128188019	A	A04 Other bacterial intestinal infections	0.00016323	0.33287	0.411781	0.5124	0.995702
rs2511714	103578874	G	A04 Other bacterial intestinal infections	0.00021861	0.19906	0.402526	0.8305	0.982624
rs305061	85975659	T	A04 Other bacterial intestinal infections	0.00013392	0.44441	0.3395	0.5962	genotyped
rs3769825	202111380	G	A04 Other bacterial intestinal infections	-8.5399e-05	0.61077	0.4289	0.08893	genotyped
rs391525	85944439	A	A04 Other bacterial intestinal infections	-7.9482e-05	0.65076	0.3379	0.1393	genotyped
rs4406737	90759724	G	A04 Other bacterial intestinal infections	0.00011584	0.48945	0.4366	0.9501	0.9932
rs4987852	60793921	T	A04 Other bacterial intestinal infections	0.0003389	0.2991	0.06935	0.188	genotyped
rs7169431	56340896	G	A04 Other bacterial intestinal infections	0.00011979	0.69091	0.0824585	0.4617	1
rs7176508	70018990	G	A04 Other bacterial intestinal infections	-0.00010052	0.5553	0.385	0.8144	genotyped
rs7231647	57628926	A	A04 Other bacterial intestinal infections	-0.00017493	0.30191	0.416174	5.948e-08	0.974209
rs735665	123361397	G	A04 Other bacterial intestinal infections	-0.0001429	0.49635	0.1935	0.5965	genotyped
rs73718779	2969278	C	A04 Other bacterial intestinal infections	0.0002239	0.4119	0.1042	0.0001314	genotyped
rs757978	242371101	C	A04 Other bacterial intestinal infections	-0.00014334	0.59162	0.1079	0.8308	genotyped
rs7944004	2311152	G	A04 Other bacterial intestinal infections	-0.00033105	0.048367	0.495364	0.1036	0.972788
rs8024033	40403657	G	A04 Other bacterial intestinal infections	7.6984e-05	0.64413	0.497166	0.6465	0.986833
rs872071	411064	G	A04 Other bacterial intestinal infections	9.3426e-05	0.57295	0.4714	0.002756	genotyped
rs898518	109016824	A	A04 Other bacterial intestinal infections	0.00013279	0.43	0.420442	0.6663	0.9953
rs9273012	32611641	G	A04 Other bacterial intestinal infections	6.6859e-05	0.73565	0.247394	7.827e-08	0.931867
rs9273363	32626272	C	A04 Other bacterial intestinal infections	9.3203e-05	0.6067	0.3017	0.008396	genotyped
rs9308731	111908262	A	A04 Other bacterial intestinal infections	-0.00021118	0.20592	0.451626	0.8251	0.992825
rs9815073	188115682	A	A04 Other bacterial intestinal infections	5.2134e-05	0.77407	0.343033	0.6382	0.920506
rs9880772	27777779	A	A04 Other bacterial intestinal infections	0.00028475	0.087661	0.45231	0.2082	0.993472
rs10069690	1279790	C	A08 Viral and other specified intestinal infections	-0.00020172	0.061059	0.2574	0.4474	genotyped
rs10936599	169492101	C	A08 Viral and other specified intestinal infections	-8.5012e-05	0.43813	0.244	0.1286	genotyped
rs13397985	231091223	T	A08 Viral and other specified intestinal infections	-0.00035029	0.0036864	0.189	0.3714	genotyped
rs13401811	111616104	A	A08 Viral and other specified intestinal infections	0.00021055	0.082916	0.184757	0.4785	0.997125
rs1679013	22206987	T	A08 Viral and other specified intestinal infections	-5.8943e-05	0.55194	0.460621	0.6164	0.901667
rs17246404	124462661	T	A08 Viral and other specified intestinal infections	0.00010711	0.3065	0.281925	0.07283	0.99983
rs17483466	111797458	A	A08 Viral and other specified intestinal infections	-0.00013623	0.24498	0.203	0.1932	genotyped
rs210134	33540209	G	A08 Viral and other specified intestinal infections	6.7193e-05	0.50842	0.3119	0.8643	genotyped
rs2236256	154478440	A	A08 Viral and other specified intestinal infections	8.8856e-05	0.34881	0.455858	0.1429	0.988131
rs2466024	128188019	A	A08 Viral and other specified intestinal infections	0.00018729	0.050354	0.411781	0.5124	0.995702
rs2511714	103578874	G	A08 Viral and other specified intestinal infections	-3.194e-05	0.74103	0.402526	0.8305	0.982624
rs305061	85975659	T	A08 Viral and other specified intestinal infections	-4.0098e-05	0.6867	0.3395	0.5962	genotyped
rs3769825	202111380	G	A08 Viral and other specified intestinal infections	2.668e-05	0.77937	0.4289	0.08893	genotyped
rs391525	85944439	A	A08 Viral and other specified intestinal infections	-9.1186e-05	0.36029	0.3379	0.1393	genotyped
rs4406737	90759724	G	A08 Viral and other specified intestinal infections	-2.929e-05	0.75822	0.4366	0.9501	0.9932
rs4987852	60793921	T	A08 Viral and other specified intestinal infections	-6.7779e-05	0.71451	0.06935	0.188	genotyped
rs7169431	56340896	G	A08 Viral and other specified intestinal infections	-3.6786e-06	0.98284	0.0824585	0.4617	1
rs7176508	70018990	G	A08 Viral and other specified intestinal infections	-5.0656e-05	0.60051	0.385	0.8144	genotyped
rs7231647	57628926	A	A08 Viral and other specified intestinal infections	5.0743e-05	0.59786	0.416174	5.948e-08	0.974209
rs735665	123361397	G	A08 Viral and other specified intestinal infections	9.6862e-05	0.4167	0.1935	0.5965	genotyped
rs73718779	2969278	C	A08 Viral and other specified intestinal infections	0.00011638	0.45206	0.1042	0.0001314	genotyped
rs757978	242371101	C	A08 Viral and other specified intestinal infections	0.00014321	0.34501	0.1079	0.8308	genotyped
rs7944004	2311152	G	A08 Viral and other specified intestinal infections	-0.00014501	0.12772	0.495364	0.1036	0.972788
rs8024033	40403657	G	A08 Viral and other specified intestinal infections	2.4153e-05	0.79848	0.497166	0.6465	0.986833
rs872071	411064	G	A08 Viral and other specified intestinal infections	3.7396e-05	0.69077	0.4714	0.002756	genotyped
rs898518	109016824	A	A08 Viral and other specified intestinal infections	2.673e-05	0.77968	0.420442	0.6663	0.9953
rs9273012	32611641	G	A08 Viral and other specified intestinal infections	3.7672e-07	0.99732	0.247394	7.827e-08	0.931867
rs9273363	32626272	C	A08 Viral and other specified intestinal infections	-0.00029036	0.0046911	0.3017	0.008396	genotyped
rs9308731	111908262	A	A08 Viral and other specified intestinal infections	4.03e-05	0.67066	0.451626	0.8251	0.992825
rs9815073	188115682	A	A08 Viral and other specified intestinal infections	0.00012151	0.23847	0.343033	0.6382	0.920506
rs9880772	27777779	A	A08 Viral and other specified intestinal infections	-4.4508e-06	0.96249	0.45231	0.2082	0.993472
rs10069690	1279790	C	A09 Diarrhoea and gastro-enteritis of presumed infectious origin	-0.00038922	0.14139	0.2574	0.4474	genotyped
rs10936599	169492101	C	A09 Diarrhoea and gastro-enteritis of presumed infectious origin	0.0001282	0.63419	0.244	0.1286	genotyped
rs13397985	231091223	T	A09 Diarrhoea and gastro-enteritis of presumed infectious origin	-0.00047087	0.11216	0.189	0.3714	genotyped
rs13401811	111616104	A	A09 Diarrhoea and gastro-enteritis of presumed infectious origin	-0.00011025	0.71174	0.184757	0.4785	0.997125
rs1679013	22206987	T	A09 Diarrhoea and gastro-enteritis of presumed infectious origin	-0.00026282	0.28045	0.460621	0.6164	0.901667
rs17246404	124462661	T	A09 Diarrhoea and gastro-enteritis of presumed infectious origin	-0.00027339	0.28793	0.281925	0.07283	0.99983
rs17483466	111797458	A	A09 Diarrhoea and gastro-enteritis of presumed infectious origin	-0.00010974	0.70309	0.203	0.1932	genotyped
rs210134	33540209	G	A09 Diarrhoea and gastro-enteritis of presumed infectious origin	-0.00018258	0.46449	0.3119	0.8643	genotyped
rs2236256	154478440	A	A09 Diarrhoea and gastro-enteritis of presumed infectious origin	8.345e-05	0.72021	0.455858	0.1429	0.988131
rs2466024	128188019	A	A09 Diarrhoea and gastro-enteritis of presumed infectious origin	0.00065546	0.0053207	0.411781	0.5124	0.995702
rs2511714	103578874	G	A09 Diarrhoea and gastro-enteritis of presumed infectious origin	-0.00015808	0.50567	0.402526	0.8305	0.982624
rs305061	85975659	T	A09 Diarrhoea and gastro-enteritis of presumed infectious origin	2.27e-05	0.92598	0.3395	0.5962	genotyped
rs3769825	202111380	G	A09 Diarrhoea and gastro-enteritis of presumed infectious origin	-0.0001127	0.6301	0.4289	0.08893	genotyped
rs391525	85944439	A	A09 Diarrhoea and gastro-enteritis of presumed infectious origin	-0.00032301	0.18733	0.3379	0.1393	genotyped
rs4406737	90759724	G	A09 Diarrhoea and gastro-enteritis of presumed infectious origin	7.0727e-05	0.76232	0.4366	0.9501	0.9932
rs4987852	60793921	T	A09 Diarrhoea and gastro-enteritis of presumed infectious origin	-0.00022043	0.62821	0.06935	0.188	genotyped
rs7169431	56340896	G	A09 Diarrhoea and gastro-enteritis of presumed infectious origin	0.00047185	0.26142	0.0824585	0.4617	1
rs7176508	70018990	G	A09 Diarrhoea and gastro-enteritis of presumed infectious origin	5.6765e-05	0.81123	0.385	0.8144	genotyped
rs7231647	57628926	A	A09 Diarrhoea and gastro-enteritis of presumed infectious origin	-3.7284e-05	0.87465	0.416174	5.948e-08	0.974209
rs735665	123361397	G	A09 Diarrhoea and gastro-enteritis of presumed infectious origin	0.00086478	0.0031735	0.1935	0.5965	genotyped
rs73718779	2969278	C	A09 Diarrhoea and gastro-enteritis of presumed infectious origin	-0.00054728	0.15002	0.1042	0.0001314	genotyped
rs757978	242371101	C	A09 Diarrhoea and gastro-enteritis of presumed infectious origin	5.9093e-05	0.874	0.1079	0.8308	genotyped
rs7944004	2311152	G	A09 Diarrhoea and gastro-enteritis of presumed infectious origin	-0.00034377	0.14177	0.495364	0.1036	0.972788
rs8024033	40403657	G	A09 Diarrhoea and gastro-enteritis of presumed infectious origin	-0.00026272	0.25833	0.497166	0.6465	0.986833
rs872071	411064	G	A09 Diarrhoea and gastro-enteritis of presumed infectious origin	0.00010279	0.65623	0.4714	0.002756	genotyped
rs898518	109016824	A	A09 Diarrhoea and gastro-enteritis of presumed infectious origin	-0.00017775	0.44876	0.420442	0.6663	0.9953
rs9273012	32611641	G	A09 Diarrhoea and gastro-enteritis of presumed infectious origin	9.4943e-05	0.73078	0.247394	7.827e-08	0.931867
rs9273363	32626272	C	A09 Diarrhoea and gastro-enteritis of presumed infectious origin	0.00015826	0.53041	0.3017	0.008396	genotyped
rs9308731	111908262	A	A09 Diarrhoea and gastro-enteritis of presumed infectious origin	-0.00022433	0.33537	0.451626	0.8251	0.992825
rs9815073	188115682	A	A09 Diarrhoea and gastro-enteritis of presumed infectious origin	-0.00032995	0.19272	0.343033	0.6382	0.920506
rs9880772	27777779	A	A09 Diarrhoea and gastro-enteritis of presumed infectious origin	0.00016894	0.46753	0.45231	0.2082	0.993472
rs10069690	1279790	C	A30-A49 Other bacterial diseases	-0.00010443	0.6855	0.2574	0.4474	genotyped
rs10936599	169492101	C	A30-A49 Other bacterial diseases	-0.00021575	0.41101	0.244	0.1286	genotyped
rs13397985	231091223	T	A30-A49 Other bacterial diseases	-0.00010534	0.71535	0.189	0.3714	genotyped
rs13401811	111616104	A	A30-A49 Other bacterial diseases	-0.00048594	0.09465	0.184757	0.4785	0.997125
rs1679013	22206987	T	A30-A49 Other bacterial diseases	-0.00035049	0.13959	0.460621	0.6164	0.901667
rs17246404	124462661	T	A30-A49 Other bacterial diseases	0.00024358	0.33112	0.281925	0.07283	0.99983
rs17483466	111797458	A	A30-A49 Other bacterial diseases	-0.00015088	0.59073	0.203	0.1932	genotyped
rs210134	33540209	G	A30-A49 Other bacterial diseases	-0.00040353	0.097183	0.3119	0.8643	genotyped
rs2236256	154478440	A	A30-A49 Other bacterial diseases	-0.00020455	0.36773	0.455858	0.1429	0.988131
rs2466024	128188019	A	A30-A49 Other bacterial diseases	-0.00022796	0.31976	0.411781	0.5124	0.995702
rs2511714	103578874	G	A30-A49 Other bacterial diseases	-8.839e-05	0.70244	0.402526	0.8305	0.982624
rs305061	85975659	T	A30-A49 Other bacterial diseases	-3.518e-05	0.88251	0.3395	0.5962	genotyped
rs3769825	202111380	G	A30-A49 Other bacterial diseases	5.2598e-05	0.81759	0.4289	0.08893	genotyped
rs391525	85944439	A	A30-A49 Other bacterial diseases	-0.00025725	0.28109	0.3379	0.1393	genotyped
rs4406737	90759724	G	A30-A49 Other bacterial diseases	-0.00043443	0.056442	0.4366	0.9501	0.9932
rs4987852	60793921	T	A30-A49 Other bacterial diseases	-0.0007056	0.11161	0.06935	0.188	genotyped
rs7169431	56340896	G	A30-A49 Other bacterial diseases	0.00065741	0.10834	0.0824585	0.4617	1
rs7176508	70018990	G	A30-A49 Other bacterial diseases	-0.00014273	0.5377	0.385	0.8144	genotyped
rs7231647	57628926	A	A30-A49 Other bacterial diseases	0.00028485	0.21606	0.416174	5.948e-08	0.974209
rs735665	123361397	G	A30-A49 Other bacterial diseases	0.00024546	0.3899	0.1935	0.5965	genotyped
rs73718779	2969278	C	A30-A49 Other bacterial diseases	-9.425e-05	0.79924	0.1042	0.0001314	genotyped
rs757978	242371101	C	A30-A49 Other bacterial diseases	0.00011573	0.74994	0.1079	0.8308	genotyped
rs7944004	2311152	G	A30-A49 Other bacterial diseases	0.00013339	0.55833	0.495364	0.1036	0.972788
rs8024033	40403657	G	A30-A49 Other bacterial diseases	-8.0255e-05	0.72309	0.497166	0.6465	0.986833
rs872071	411064	G	A30-A49 Other bacterial diseases	-3.1222e-05	0.88968	0.4714	0.002756	genotyped
rs898518	109016824	A	A30-A49 Other bacterial diseases	0.00023379	0.30663	0.420442	0.6663	0.9953
rs9273012	32611641	G	A30-A49 Other bacterial diseases	0.00040375	0.1333	0.247394	7.827e-08	0.931867
rs9273363	32626272	C	A30-A49 Other bacterial diseases	-0.00033856	0.16853	0.3017	0.008396	genotyped
rs9308731	111908262	A	A30-A49 Other bacterial diseases	0.00040185	0.07658	0.451626	0.8251	0.992825
rs9815073	188115682	A	A30-A49 Other bacterial diseases	0.00023841	0.33389	0.343033	0.6382	0.920506
rs9880772	27777779	A	A30-A49 Other bacterial diseases	0.00015687	0.48857	0.45231	0.2082	0.993472
rs10069690	1279790	C	A41 Other septicaemia	-0.00014756	0.51557	0.2574	0.4474	genotyped
rs10936599	169492101	C	A41 Other septicaemia	-0.00016657	0.47097	0.244	0.1286	genotyped
rs13397985	231091223	T	A41 Other septicaemia	-5.2569e-05	0.83619	0.189	0.3714	genotyped
rs13401811	111616104	A	A41 Other septicaemia	-0.00029332	0.25172	0.184757	0.4785	0.997125
rs1679013	22206987	T	A41 Other septicaemia	-0.00022374	0.28394	0.460621	0.6164	0.901667
rs17246404	124462661	T	A41 Other septicaemia	0.00013942	0.52737	0.281925	0.07283	0.99983
rs17483466	111797458	A	A41 Other septicaemia	-9.9343e-05	0.68748	0.203	0.1932	genotyped
rs210134	33540209	G	A41 Other septicaemia	-0.00023241	0.27782	0.3119	0.8643	genotyped
rs2236256	154478440	A	A41 Other septicaemia	2.11e-05	0.91594	0.455858	0.1429	0.988131
rs2466024	128188019	A	A41 Other septicaemia	-7.2493e-05	0.71923	0.411781	0.5124	0.995702
rs2511714	103578874	G	A41 Other septicaemia	4.9126e-05	0.80937	0.402526	0.8305	0.982624
rs305061	85975659	T	A41 Other septicaemia	0.0001149	0.58341	0.3395	0.5962	genotyped
rs3769825	202111380	G	A41 Other septicaemia	9.742e-05	0.62743	0.4289	0.08893	genotyped
rs391525	85944439	A	A41 Other septicaemia	-0.00020632	0.32603	0.3379	0.1393	genotyped
rs4406737	90759724	G	A41 Other septicaemia	-0.00042715	0.03313	0.4366	0.9501	0.9932
rs4987852	60793921	T	A41 Other septicaemia	-0.00012986	0.73939	0.06935	0.188	genotyped
rs7169431	56340896	G	A41 Other septicaemia	0.00029392	0.41478	0.0824585	0.4617	1
rs7176508	70018990	G	A41 Other septicaemia	-7.6774e-05	0.70649	0.385	0.8144	genotyped
rs7231647	57628926	A	A41 Other septicaemia	0.00032759	0.10604	0.416174	5.948e-08	0.974209
rs735665	123361397	G	A41 Other septicaemia	5.1665e-05	0.8371	0.1935	0.5965	genotyped
rs73718779	2969278	C	A41 Other septicaemia	-9.5786e-05	0.76904	0.1042	0.0001314	genotyped
rs757978	242371101	C	A41 Other septicaemia	-1.0908e-05	0.97277	0.1079	0.8308	genotyped
rs7944004	2311152	G	A41 Other septicaemia	0.0001035	0.60589	0.495364	0.1036	0.972788
rs8024033	40403657	G	A41 Other septicaemia	-0.00020642	0.30053	0.497166	0.6465	0.986833
rs872071	411064	G	A41 Other septicaemia	-6.3533e-05	0.74847	0.4714	0.002756	genotyped
rs898518	109016824	A	A41 Other septicaemia	6.4367e-05	0.74915	0.420442	0.6663	0.9953
rs9273012	32611641	G	A41 Other septicaemia	0.00035974	0.12863	0.247394	7.827e-08	0.931867
rs9273363	32626272	C	A41 Other septicaemia	-0.00036896	0.088254	0.3017	0.008396	genotyped
rs9308731	111908262	A	A41 Other septicaemia	0.00025801	0.19642	0.451626	0.8251	0.992825
rs9815073	188115682	A	A41 Other septicaemia	0.00012201	0.57435	0.343033	0.6382	0.920506
rs9880772	27777779	A	A41 Other septicaemia	0.00018674	0.34909	0.45231	0.2082	0.993472
rs10069690	1279790	C	A49 Bacterial infection of unspecified site	0.00023854	0.019483	0.2574	0.4474	genotyped
rs10936599	169492101	C	A49 Bacterial infection of unspecified site	-1.5308e-05	0.88292	0.244	0.1286	genotyped
rs13397985	231091223	T	A49 Bacterial infection of unspecified site	7.2739e-05	0.52481	0.189	0.3714	genotyped
rs13401811	111616104	A	A49 Bacterial infection of unspecified site	-0.00023259	0.04336	0.184757	0.4785	0.997125
rs1679013	22206987	T	A49 Bacterial infection of unspecified site	-5.4189e-05	0.56404	0.460621	0.6164	0.901667
rs17246404	124462661	T	A49 Bacterial infection of unspecified site	-0.00017038	0.086152	0.281925	0.07283	0.99983
rs17483466	111797458	A	A49 Bacterial infection of unspecified site	-4.7439e-05	0.66939	0.203	0.1932	genotyped
rs210134	33540209	G	A49 Bacterial infection of unspecified site	-8.9452e-05	0.35322	0.3119	0.8643	genotyped
rs2236256	154478440	A	A49 Bacterial infection of unspecified site	-0.00028922	0.0013011	0.455858	0.1429	0.988131
rs2466024	128188019	A	A49 Bacterial infection of unspecified site	-9.009e-05	0.32079	0.411781	0.5124	0.995702
rs2511714	103578874	G	A49 Bacterial infection of unspecified site	-8.5146e-05	0.35278	0.402526	0.8305	0.982624
rs305061	85975659	T	A49 Bacterial infection of unspecified site	-4.7819e-05	0.61197	0.3395	0.5962	genotyped
rs3769825	202111380	G	A49 Bacterial infection of unspecified site	-0.00010517	0.24417	0.4289	0.08893	genotyped
rs391525	85944439	A	A49 Bacterial infection of unspecified site	-8.6639e-05	0.35933	0.3379	0.1393	genotyped
rs4406737	90759724	G	A49 Bacterial infection of unspecified site	-0.00010573	0.24115	0.4366	0.9501	0.9932
rs4987852	60793921	T	A49 Bacterial infection of unspecified site	-0.00055582	0.0015567	0.06935	0.188	genotyped
rs7169431	56340896	G	A49 Bacterial infection of unspecified site	0.00024246	0.13476	0.0824585	0.4617	1
rs7176508	70018990	G	A49 Bacterial infection of unspecified site	-9.9627e-05	0.2773	0.385	0.8144	genotyped
rs7231647	57628926	A	A49 Bacterial infection of unspecified site	1.3672e-05	0.88085	0.416174	5.948e-08	0.974209
rs735665	123361397	G	A49 Bacterial infection of unspecified site	0.00017067	0.13119	0.1935	0.5965	genotyped
rs73718779	2969278	C	A49 Bacterial infection of unspecified site	-1.1425e-05	0.93795	0.1042	0.0001314	genotyped
rs757978	242371101	C	A49 Bacterial infection of unspecified site	-9.4621e-05	0.51051	0.1079	0.8308	genotyped
rs7944004	2311152	G	A49 Bacterial infection of unspecified site	2.8178e-05	0.7549	0.495364	0.1036	0.972788
rs8024033	40403657	G	A49 Bacterial infection of unspecified site	-1.3622e-05	0.87927	0.497166	0.6465	0.986833
rs872071	411064	G	A49 Bacterial infection of unspecified site	-2.3999e-05	0.78777	0.4714	0.002756	genotyped
rs898518	109016824	A	A49 Bacterial infection of unspecified site	0.00015742	0.082126	0.420442	0.6663	0.9953
rs9273012	32611641	G	A49 Bacterial infection of unspecified site	-8.5717e-06	0.93586	0.247394	7.827e-08	0.931867
rs9273363	32626272	C	A49 Bacterial infection of unspecified site	-0.00010353	0.28773	0.3017	0.008396	genotyped
rs9308731	111908262	A	A49 Bacterial infection of unspecified site	0.00015461	0.085324	0.451626	0.8251	0.992825
rs9815073	188115682	A	A49 Bacterial infection of unspecified site	0.00019176	0.049742	0.343033	0.6382	0.920506
rs9880772	27777779	A	A49 Bacterial infection of unspecified site	-0.00013018	0.14681	0.45231	0.2082	0.993472
rs10069690	1279790	C	abdominal hernia	-0.00015515	0.38844	0.2574	0.4474	genotyped
rs10936599	169492101	C	abdominal hernia	8.1583e-06	0.9645	0.244	0.1286	genotyped
rs13397985	231091223	T	abdominal hernia	-0.00011995	0.55189	0.189	0.3714	genotyped
rs13401811	111616104	A	abdominal hernia	0.00019595	0.33429	0.184757	0.4785	0.997125
rs1679013	22206987	T	abdominal hernia	-4.9565e-05	0.76458	0.460621	0.6164	0.901667
rs17246404	124462661	T	abdominal hernia	-7.1307e-05	0.68355	0.281925	0.07283	0.99983
rs17483466	111797458	A	abdominal hernia	-8.0413e-05	0.68138	0.203	0.1932	genotyped
rs210134	33540209	G	abdominal hernia	-1.1148e-05	0.94763	0.3119	0.8643	genotyped
rs2236256	154478440	A	abdominal hernia	0.00025251	0.11101	0.455858	0.1429	0.988131
rs2466024	128188019	A	abdominal hernia	-0.00017475	0.27436	0.411781	0.5124	0.995702
rs2511714	103578874	G	abdominal hernia	-1.2387e-05	0.93884	0.402526	0.8305	0.982624
rs305061	85975659	T	abdominal hernia	-0.00019898	0.23084	0.3395	0.5962	genotyped
rs3769825	202111380	G	abdominal hernia	0.00015689	0.32435	0.4289	0.08893	genotyped
rs391525	85944439	A	abdominal hernia	0.0001612	0.33297	0.3379	0.1393	genotyped
rs4406737	90759724	G	abdominal hernia	-0.00013288	0.40321	0.4366	0.9501	0.9932
rs4987852	60793921	T	abdominal hernia	8.5493e-05	0.78241	0.06935	0.188	genotyped
rs7169431	56340896	G	abdominal hernia	-4.6302e-05	0.87122	0.0824585	0.4617	1
rs7176508	70018990	G	abdominal hernia	-3.8235e-05	0.81293	0.385	0.8144	genotyped
rs7231647	57628926	A	abdominal hernia	-5.4062e-05	0.73659	0.416174	5.948e-08	0.974209
rs735665	123361397	G	abdominal hernia	0.00025406	0.20232	0.1935	0.5965	genotyped
rs73718779	2969278	C	abdominal hernia	0.00026137	0.31207	0.1042	0.0001314	genotyped
rs757978	242371101	C	abdominal hernia	0.00072949	0.0040028	0.1079	0.8308	genotyped
rs7944004	2311152	G	abdominal hernia	-0.00015299	0.33616	0.495364	0.1036	0.972788
rs8024033	40403657	G	abdominal hernia	5.4283e-05	0.73119	0.497166	0.6465	0.986833
rs872071	411064	G	abdominal hernia	-0.00012917	0.4108	0.4714	0.002756	genotyped
rs898518	109016824	A	abdominal hernia	0.00020341	0.20234	0.420442	0.6663	0.9953
rs9273012	32611641	G	abdominal hernia	-0.00015804	0.39967	0.247394	7.827e-08	0.931867
rs9273363	32626272	C	abdominal hernia	2.7613e-06	0.98716	0.3017	0.008396	genotyped
rs9308731	111908262	A	abdominal hernia	0.00019864	0.20983	0.451626	0.8251	0.992825
rs9815073	188115682	A	abdominal hernia	2.158e-05	0.90034	0.343033	0.6382	0.920506
rs9880772	27777779	A	abdominal hernia	-0.00017109	0.27951	0.45231	0.2082	0.993472
rs10069690	1279790	C	Alcohol drinker status	0.00058689	0.52005	0.2574	0.4474	genotyped
rs10936599	169492101	C	Alcohol drinker status	-0.00041455	0.65548	0.244	0.1286	genotyped
rs13397985	231091223	T	Alcohol drinker status	-0.00077932	0.44599	0.189	0.3714	genotyped
rs13401811	111616104	A	Alcohol drinker status	-0.00018337	0.85861	0.184757	0.4785	0.997125
rs1679013	22206987	T	Alcohol drinker status	0.0010387	0.21558	0.460621	0.6164	0.901667
rs17246404	124462661	T	Alcohol drinker status	0.00059996	0.49852	0.281925	0.07283	0.99983
rs17483466	111797458	A	Alcohol drinker status	8.2746e-05	0.93361	0.203	0.1932	genotyped
rs210134	33540209	G	Alcohol drinker status	0.00070805	0.41037	0.3119	0.8643	genotyped
rs2236256	154478440	A	Alcohol drinker status	-0.00011748	0.88365	0.455858	0.1429	0.988131
rs2466024	128188019	A	Alcohol drinker status	-0.00083496	0.30264	0.411781	0.5124	0.995702
rs2511714	103578874	G	Alcohol drinker status	-0.0006149	0.45221	0.402526	0.8305	0.982624
rs305061	85975659	T	Alcohol drinker status	-0.00011223	0.89392	0.3395	0.5962	genotyped
rs3769825	202111380	G	Alcohol drinker status	7.1796e-05	0.92914	0.4289	0.08893	genotyped
rs391525	85944439	A	Alcohol drinker status	-1.3804e-06	0.99869	0.3379	0.1393	genotyped
rs4406737	90759724	G	Alcohol drinker status	0.00072509	0.36829	0.4366	0.9501	0.9932
rs4987852	60793921	T	Alcohol drinker status	0.00050654	0.74668	0.06935	0.188	genotyped
rs7169431	56340896	G	Alcohol drinker status	-0.00011396	0.93721	0.0824585	0.4617	1
rs7176508	70018990	G	Alcohol drinker status	-0.0010344	0.20624	0.385	0.8144	genotyped
rs7231647	57628926	A	Alcohol drinker status	-0.0012002	0.14043	0.416174	5.948e-08	0.974209
rs735665	123361397	G	Alcohol drinker status	-0.00032841	0.74501	0.1935	0.5965	genotyped
rs73718779	2969278	C	Alcohol drinker status	-0.0028378	0.030298	0.1042	0.0001314	genotyped
rs757978	242371101	C	Alcohol drinker status	-0.0015831	0.21814	0.1079	0.8308	genotyped
rs7944004	2311152	G	Alcohol drinker status	0.00020227	0.80187	0.495364	0.1036	0.972788
rs8024033	40403657	G	Alcohol drinker status	-0.00031296	0.69577	0.497166	0.6465	0.986833
rs872071	411064	G	Alcohol drinker status	-0.0023065	0.003748	0.4714	0.002756	genotyped
rs898518	109016824	A	Alcohol drinker status	0.00025906	0.74877	0.420442	0.6663	0.9953
rs9273012	32611641	G	Alcohol drinker status	-0.0021641	0.022838	0.247394	7.827e-08	0.931867
rs9273363	32626272	C	Alcohol drinker status	0.001165	0.18018	0.3017	0.008396	genotyped
rs9308731	111908262	A	Alcohol drinker status	0.0010033	0.21169	0.451626	0.8251	0.992825
rs9815073	188115682	A	Alcohol drinker status	2.2697e-05	0.97927	0.343033	0.6382	0.920506
rs9880772	27777779	A	Alcohol drinker status	0.00067173	0.40223	0.45231	0.2082	0.993472
rs10069690	1279790	C	Alcohol intake frequency.	0.0023112	0.47534	0.2574	0.4474	genotyped
rs10936599	169492101	C	Alcohol intake frequency.	0.0050993	0.12226	0.244	0.1286	genotyped
rs13397985	231091223	T	Alcohol intake frequency.	0.0067775	0.06251	0.189	0.3714	genotyped
rs13401811	111616104	A	Alcohol intake frequency.	-0.0050935	0.16432	0.184757	0.4785	0.997125
rs1679013	22206987	T	Alcohol intake frequency.	-0.011242	0.00015757	0.460621	0.6164	0.901667
rs17246404	124462661	T	Alcohol intake frequency.	0.0025261	0.42232	0.281925	0.07283	0.99983
rs17483466	111797458	A	Alcohol intake frequency.	-0.0039005	0.26977	0.203	0.1932	genotyped
rs210134	33540209	G	Alcohol intake frequency.	-0.0033111	0.27826	0.3119	0.8643	genotyped
rs2236256	154478440	A	Alcohol intake frequency.	0.0034368	0.22794	0.455858	0.1429	0.988131
rs2466024	128188019	A	Alcohol intake frequency.	0.0041427	0.14937	0.411781	0.5124	0.995702
rs2511714	103578874	G	Alcohol intake frequency.	0.0011176	0.70011	0.402526	0.8305	0.982624
rs305061	85975659	T	Alcohol intake frequency.	0.0049023	0.1008	0.3395	0.5962	genotyped
rs3769825	202111380	G	Alcohol intake frequency.	0.0043303	0.13171	0.4289	0.08893	genotyped
rs391525	85944439	A	Alcohol intake frequency.	-0.0070382	0.018784	0.3379	0.1393	genotyped
rs4406737	90759724	G	Alcohol intake frequency.	-0.0017696	0.53584	0.4366	0.9501	0.9932
rs4987852	60793921	T	Alcohol intake frequency.	-0.0058041	0.29644	0.06935	0.188	genotyped
rs7169431	56340896	G	Alcohol intake frequency.	0.0071479	0.16339	0.0824585	0.4617	1
rs7176508	70018990	G	Alcohol intake frequency.	0.0045584	0.11611	0.385	0.8144	genotyped
rs7231647	57628926	A	Alcohol intake frequency.	-0.0019329	0.50304	0.416174	5.948e-08	0.974209
rs735665	123361397	G	Alcohol intake frequency.	0.0022186	0.53578	0.1935	0.5965	genotyped
rs73718779	2969278	C	Alcohol intake frequency.	0.0085679	0.065493	0.1042	0.0001314	genotyped
rs757978	242371101	C	Alcohol intake frequency.	-0.0010715	0.81479	0.1079	0.8308	genotyped
rs7944004	2311152	G	Alcohol intake frequency.	-0.0028566	0.31791	0.495364	0.1036	0.972788
rs8024033	40403657	G	Alcohol intake frequency.	-0.00074095	0.79397	0.497166	0.6465	0.986833
rs872071	411064	G	Alcohol intake frequency.	0.0066792	0.018079	0.4714	0.002756	genotyped
rs898518	109016824	A	Alcohol intake frequency.	-0.0046504	0.10561	0.420442	0.6663	0.9953
rs9273012	32611641	G	Alcohol intake frequency.	0.0024749	0.4635	0.247394	7.827e-08	0.931867
rs9273363	32626272	C	Alcohol intake frequency.	-0.0014143	0.64678	0.3017	0.008396	genotyped
rs9308731	111908262	A	Alcohol intake frequency.	-0.0015471	0.58836	0.451626	0.8251	0.992825
rs9815073	188115682	A	Alcohol intake frequency.	0.0025257	0.41556	0.343033	0.6382	0.920506
rs9880772	27777779	A	Alcohol intake frequency.	0.001437	0.61386	0.45231	0.2082	0.993472
rs10069690	1279790	C	allergy or anaphylactic reaction to drug	0.00012206	0.58282	0.2574	0.4474	genotyped
rs10936599	169492101	C	allergy or anaphylactic reaction to drug	0.00034883	0.12326	0.244	0.1286	genotyped
rs13397985	231091223	T	allergy or anaphylactic reaction to drug	-0.00010254	0.68054	0.189	0.3714	genotyped
rs13401811	111616104	A	allergy or anaphylactic reaction to drug	-0.00020306	0.41794	0.184757	0.4785	0.997125
rs1679013	22206987	T	allergy or anaphylactic reaction to drug	-0.00022519	0.27087	0.460621	0.6164	0.901667
rs17246404	124462661	T	allergy or anaphylactic reaction to drug	3.5331e-05	0.87012	0.281925	0.07283	0.99983
rs17483466	111797458	A	allergy or anaphylactic reaction to drug	-0.00025592	0.29009	0.203	0.1932	genotyped
rs210134	33540209	G	allergy or anaphylactic reaction to drug	-8.4057e-05	0.68868	0.3119	0.8643	genotyped
rs2236256	154478440	A	allergy or anaphylactic reaction to drug	3.6335e-05	0.8528	0.455858	0.1429	0.988131
rs2466024	128188019	A	allergy or anaphylactic reaction to drug	-3.8737e-05	0.84452	0.411781	0.5124	0.995702
rs2511714	103578874	G	allergy or anaphylactic reaction to drug	-0.00013204	0.50799	0.402526	0.8305	0.982624
rs305061	85975659	T	allergy or anaphylactic reaction to drug	-0.00026816	0.19128	0.3395	0.5962	genotyped
rs3769825	202111380	G	allergy or anaphylactic reaction to drug	0.00012243	0.53351	0.4289	0.08893	genotyped
rs391525	85944439	A	allergy or anaphylactic reaction to drug	0.0001128	0.58352	0.3379	0.1393	genotyped
rs4406737	90759724	G	allergy or anaphylactic reaction to drug	0.00019195	0.32832	0.4366	0.9501	0.9932
rs4987852	60793921	T	allergy or anaphylactic reaction to drug	-0.00017826	0.64113	0.06935	0.188	genotyped
rs7169431	56340896	G	allergy or anaphylactic reaction to drug	5.2899e-05	0.88086	0.0824585	0.4617	1
rs7176508	70018990	G	allergy or anaphylactic reaction to drug	-4.819e-05	0.80927	0.385	0.8144	genotyped
rs7231647	57628926	A	allergy or anaphylactic reaction to drug	-0.00021867	0.27076	0.416174	5.948e-08	0.974209
rs735665	123361397	G	allergy or anaphylactic reaction to drug	0.00031442	0.20145	0.1935	0.5965	genotyped
rs73718779	2969278	C	allergy or anaphylactic reaction to drug	0.00018976	0.55265	0.1042	0.0001314	genotyped
rs757978	242371101	C	allergy or anaphylactic reaction to drug	-0.00045908	0.14258	0.1079	0.8308	genotyped
rs7944004	2311152	G	allergy or anaphylactic reaction to drug	-0.00016451	0.40243	0.495364	0.1036	0.972788
rs8024033	40403657	G	allergy or anaphylactic reaction to drug	0.00029872	0.12604	0.497166	0.6465	0.986833
rs872071	411064	G	allergy or anaphylactic reaction to drug	0.00023167	0.23265	0.4714	0.002756	genotyped
rs898518	109016824	A	allergy or anaphylactic reaction to drug	-0.00022779	0.24791	0.420442	0.6663	0.9953
rs9273012	32611641	G	allergy or anaphylactic reaction to drug	-9.9014e-05	0.66944	0.247394	7.827e-08	0.931867
rs9273363	32626272	C	allergy or anaphylactic reaction to drug	5.6921e-05	0.78835	0.3017	0.008396	genotyped
rs9308731	111908262	A	allergy or anaphylactic reaction to drug	0.00019992	0.30687	0.451626	0.8251	0.992825
rs9815073	188115682	A	allergy or anaphylactic reaction to drug	0.00029263	0.16906	0.343033	0.6382	0.920506
rs9880772	27777779	A	allergy or anaphylactic reaction to drug	-9.17e-06	0.96256	0.45231	0.2082	0.993472
rs10069690	1279790	C	allergy or anaphylactic reaction to food	5.7216e-05	0.72176	0.2574	0.4474	genotyped
rs10936599	169492101	C	allergy or anaphylactic reaction to food	-0.00031155	0.05686	0.244	0.1286	genotyped
rs13397985	231091223	T	allergy or anaphylactic reaction to food	0.00014167	0.43124	0.189	0.3714	genotyped
rs13401811	111616104	A	allergy or anaphylactic reaction to food	0.00031772	0.07949	0.184757	0.4785	0.997125
rs1679013	22206987	T	allergy or anaphylactic reaction to food	2.3583e-05	0.87324	0.460621	0.6164	0.901667
rs17246404	124462661	T	allergy or anaphylactic reaction to food	-0.00012735	0.41484	0.281925	0.07283	0.99983
rs17483466	111797458	A	allergy or anaphylactic reaction to food	0.00022771	0.19278	0.203	0.1932	genotyped
rs210134	33540209	G	allergy or anaphylactic reaction to food	4.425e-05	0.77051	0.3119	0.8643	genotyped
rs2236256	154478440	A	allergy or anaphylactic reaction to food	-0.00016947	0.23136	0.455858	0.1429	0.988131
rs2466024	128188019	A	allergy or anaphylactic reaction to food	-0.00016137	0.25828	0.411781	0.5124	0.995702
rs2511714	103578874	G	allergy or anaphylactic reaction to food	-0.00024612	0.087756	0.402526	0.8305	0.982624
rs305061	85975659	T	allergy or anaphylactic reaction to food	-0.00016159	0.27596	0.3395	0.5962	genotyped
rs3769825	202111380	G	allergy or anaphylactic reaction to food	-2.4257e-05	0.86446	0.4289	0.08893	genotyped
rs391525	85944439	A	allergy or anaphylactic reaction to food	0.00014331	0.33522	0.3379	0.1393	genotyped
rs4406737	90759724	G	allergy or anaphylactic reaction to food	-9.1442e-05	0.51952	0.4366	0.9501	0.9932
rs4987852	60793921	T	allergy or anaphylactic reaction to food	0.00037654	0.17312	0.06935	0.188	genotyped
rs7169431	56340896	G	allergy or anaphylactic reaction to food	-0.00026082	0.30661	0.0824585	0.4617	1
rs7176508	70018990	G	allergy or anaphylactic reaction to food	2.0593e-05	0.88653	0.385	0.8144	genotyped
rs7231647	57628926	A	allergy or anaphylactic reaction to food	6.413e-05	0.65497	0.416174	5.948e-08	0.974209
rs735665	123361397	G	allergy or anaphylactic reaction to food	-0.00017188	0.33389	0.1935	0.5965	genotyped
rs73718779	2969278	C	allergy or anaphylactic reaction to food	0.00019953	0.38784	0.1042	0.0001314	genotyped
rs757978	242371101	C	allergy or anaphylactic reaction to food	0.00022892	0.3117	0.1079	0.8308	genotyped
rs7944004	2311152	G	allergy or anaphylactic reaction to food	4.9522e-05	0.72727	0.495364	0.1036	0.972788
rs8024033	40403657	G	allergy or anaphylactic reaction to food	6.351e-06	0.96411	0.497166	0.6465	0.986833
rs872071	411064	G	allergy or anaphylactic reaction to food	0.00036134	0.010033	0.4714	0.002756	genotyped
rs898518	109016824	A	allergy or anaphylactic reaction to food	0.00011552	0.41744	0.420442	0.6663	0.9953
rs9273012	32611641	G	allergy or anaphylactic reaction to food	1.6195e-05	0.92306	0.247394	7.827e-08	0.931867
rs9273363	32626272	C	allergy or anaphylactic reaction to food	8.6532e-05	0.57247	0.3017	0.008396	genotyped
rs9308731	111908262	A	allergy or anaphylactic reaction to food	1.1832e-05	0.93332	0.451626	0.8251	0.992825
rs9815073	188115682	A	allergy or anaphylactic reaction to food	0.00027162	0.077395	0.343033	0.6382	0.920506
rs9880772	27777779	A	allergy or anaphylactic reaction to food	3.505e-05	0.80396	0.45231	0.2082	0.993472
rs10069690	1279790	C	allergy/hypersensitivity/anaphylaxis	0.00058577	0.33771	0.2574	0.4474	genotyped
rs10936599	169492101	C	allergy/hypersensitivity/anaphylaxis	-0.0010725	0.084728	0.244	0.1286	genotyped
rs13397985	231091223	T	allergy/hypersensitivity/anaphylaxis	0.00089163	0.19285	0.189	0.3714	genotyped
rs13401811	111616104	A	allergy/hypersensitivity/anaphylaxis	0.00077985	0.25785	0.184757	0.4785	0.997125
rs1679013	22206987	T	allergy/hypersensitivity/anaphylaxis	-0.00030357	0.58894	0.460621	0.6164	0.901667
rs17246404	124462661	T	allergy/hypersensitivity/anaphylaxis	-0.00081822	0.16796	0.281925	0.07283	0.99983
rs17483466	111797458	A	allergy/hypersensitivity/anaphylaxis	-0.00019363	0.77095	0.203	0.1932	genotyped
rs210134	33540209	G	allergy/hypersensitivity/anaphylaxis	-0.0021966	0.00013946	0.3119	0.8643	genotyped
rs2236256	154478440	A	allergy/hypersensitivity/anaphylaxis	-0.00039214	0.4663	0.455858	0.1429	0.988131
rs2466024	128188019	A	allergy/hypersensitivity/anaphylaxis	-0.00041252	0.44678	0.411781	0.5124	0.995702
rs2511714	103578874	G	allergy/hypersensitivity/anaphylaxis	-0.00010101	0.85365	0.402526	0.8305	0.982624
rs305061	85975659	T	allergy/hypersensitivity/anaphylaxis	0.00057105	0.31105	0.3395	0.5962	genotyped
rs3769825	202111380	G	allergy/hypersensitivity/anaphylaxis	-0.00061051	0.25875	0.4289	0.08893	genotyped
rs391525	85944439	A	allergy/hypersensitivity/anaphylaxis	-0.00044319	0.43296	0.3379	0.1393	genotyped
rs4406737	90759724	G	allergy/hypersensitivity/anaphylaxis	0.00023907	0.65753	0.4366	0.9501	0.9932
rs4987852	60793921	T	allergy/hypersensitivity/anaphylaxis	-0.00029462	0.77893	0.06935	0.188	genotyped
rs7169431	56340896	G	allergy/hypersensitivity/anaphylaxis	-0.0012516	0.1966	0.0824585	0.4617	1
rs7176508	70018990	G	allergy/hypersensitivity/anaphylaxis	9.9686e-05	0.85572	0.385	0.8144	genotyped
rs7231647	57628926	A	allergy/hypersensitivity/anaphylaxis	-0.00010464	0.84772	0.416174	5.948e-08	0.974209
rs735665	123361397	G	allergy/hypersensitivity/anaphylaxis	0.00027898	0.67984	0.1935	0.5965	genotyped
rs73718779	2969278	C	allergy/hypersensitivity/anaphylaxis	0.0027035	0.0020855	0.1042	0.0001314	genotyped
rs757978	242371101	C	allergy/hypersensitivity/anaphylaxis	0.00060876	0.47944	0.1079	0.8308	genotyped
rs7944004	2311152	G	allergy/hypersensitivity/anaphylaxis	0.00041632	0.44043	0.495364	0.1036	0.972788
rs8024033	40403657	G	allergy/hypersensitivity/anaphylaxis	0.00011655	0.82791	0.497166	0.6465	0.986833
rs872071	411064	G	allergy/hypersensitivity/anaphylaxis	7.8029e-05	0.88372	0.4714	0.002756	genotyped
rs898518	109016824	A	allergy/hypersensitivity/anaphylaxis	-7.718e-05	0.88665	0.420442	0.6663	0.9953
rs9273012	32611641	G	allergy/hypersensitivity/anaphylaxis	0.00073385	0.24967	0.247394	7.827e-08	0.931867
rs9273363	32626272	C	allergy/hypersensitivity/anaphylaxis	0.0013632	0.019334	0.3017	0.008396	genotyped
rs9308731	111908262	A	allergy/hypersensitivity/anaphylaxis	0.00013366	0.80376	0.451626	0.8251	0.992825
rs9815073	188115682	A	allergy/hypersensitivity/anaphylaxis	0.0025199	1.6465e-05	0.343033	0.6382	0.920506
rs9880772	27777779	A	allergy/hypersensitivity/anaphylaxis	-0.0006989	0.19307	0.45231	0.2082	0.993472
rs10069690	1279790	C	anaemia	-0.00064194	0.0074766	0.2574	0.4474	genotyped
rs10936599	169492101	C	anaemia	-0.00016187	0.50774	0.244	0.1286	genotyped
rs13397985	231091223	T	anaemia	-0.00029696	0.26948	0.189	0.3714	genotyped
rs13401811	111616104	A	anaemia	0.00010597	0.69543	0.184757	0.4785	0.997125
rs1679013	22206987	T	anaemia	-8.3965e-05	0.70382	0.460621	0.6164	0.901667
rs17246404	124462661	T	anaemia	9.0161e-05	0.6992	0.281925	0.07283	0.99983
rs17483466	111797458	A	anaemia	6.3374e-05	0.80831	0.203	0.1932	genotyped
rs210134	33540209	G	anaemia	0.00013321	0.55661	0.3119	0.8643	genotyped
rs2236256	154478440	A	anaemia	0.00011501	0.5866	0.455858	0.1429	0.988131
rs2466024	128188019	A	anaemia	6.1519e-05	0.77299	0.411781	0.5124	0.995702
rs2511714	103578874	G	anaemia	-6.7493e-05	0.75398	0.402526	0.8305	0.982624
rs305061	85975659	T	anaemia	0.00038563	0.081814	0.3395	0.5962	genotyped
rs3769825	202111380	G	anaemia	0.00011445	0.58986	0.4289	0.08893	genotyped
rs391525	85944439	A	anaemia	-0.00023024	0.30007	0.3379	0.1393	genotyped
rs4406737	90759724	G	anaemia	-9.9955e-05	0.63744	0.4366	0.9501	0.9932
rs4987852	60793921	T	anaemia	0.00069815	0.090951	0.06935	0.188	genotyped
rs7169431	56340896	G	anaemia	-0.00030809	0.41886	0.0824585	0.4617	1
rs7176508	70018990	G	anaemia	-2.8195e-05	0.89595	0.385	0.8144	genotyped
rs7231647	57628926	A	anaemia	0.00019418	0.36517	0.416174	5.948e-08	0.974209
rs735665	123361397	G	anaemia	-0.00017019	0.52203	0.1935	0.5965	genotyped
rs73718779	2969278	C	anaemia	4.7541e-05	0.89044	0.1042	0.0001314	genotyped
rs757978	242371101	C	anaemia	0.00014808	0.66137	0.1079	0.8308	genotyped
rs7944004	2311152	G	anaemia	0.00014806	0.48537	0.495364	0.1036	0.972788
rs8024033	40403657	G	anaemia	-6.4727e-05	0.75884	0.497166	0.6465	0.986833
rs872071	411064	G	anaemia	0.00038887	0.063595	0.4714	0.002756	genotyped
rs898518	109016824	A	anaemia	-0.00041472	0.051364	0.420442	0.6663	0.9953
rs9273012	32611641	G	anaemia	0.0011751	2.7165e-06	0.247394	7.827e-08	0.931867
rs9273363	32626272	C	anaemia	-0.0012993	1.3967e-08	0.3017	0.008396	genotyped
rs9308731	111908262	A	anaemia	0.00048107	0.022782	0.451626	0.8251	0.992825
rs9815073	188115682	A	anaemia	-0.00032407	0.15839	0.343033	0.6382	0.920506
rs9880772	27777779	A	anaemia	4.7099e-05	0.8233	0.45231	0.2082	0.993472
rs10069690	1279790	C	anal problem	2.2778e-05	0.86684	0.2574	0.4474	genotyped
rs10936599	169492101	C	anal problem	0.00023472	0.089708	0.244	0.1286	genotyped
rs13397985	231091223	T	anal problem	3.2458e-06	0.98298	0.189	0.3714	genotyped
rs13401811	111616104	A	anal problem	-0.00014945	0.32926	0.184757	0.4785	0.997125
rs1679013	22206987	T	anal problem	2.9228e-05	0.81506	0.460621	0.6164	0.901667
rs17246404	124462661	T	anal problem	-8.987e-05	0.49614	0.281925	0.07283	0.99983
rs17483466	111797458	A	anal problem	2.5614e-05	0.86243	0.203	0.1932	genotyped
rs210134	33540209	G	anal problem	2.9864e-05	0.81575	0.3119	0.8643	genotyped
rs2236256	154478440	A	anal problem	0.00026859	0.024759	0.455858	0.1429	0.988131
rs2466024	128188019	A	anal problem	-5.7751e-05	0.63238	0.411781	0.5124	0.995702
rs2511714	103578874	G	anal problem	4.4121e-05	0.71742	0.402526	0.8305	0.982624
rs305061	85975659	T	anal problem	0.00030172	0.016135	0.3395	0.5962	genotyped
rs3769825	202111380	G	anal problem	0.00014023	0.24316	0.4289	0.08893	genotyped
rs391525	85944439	A	anal problem	8.4419e-05	0.50198	0.3379	0.1393	genotyped
rs4406737	90759724	G	anal problem	9.3632e-05	0.43524	0.4366	0.9501	0.9932
rs4987852	60793921	T	anal problem	-0.00013468	0.56432	0.06935	0.188	genotyped
rs7169431	56340896	G	anal problem	0.00023003	0.28618	0.0824585	0.4617	1
rs7176508	70018990	G	anal problem	-2.5774e-05	0.83269	0.385	0.8144	genotyped
rs7231647	57628926	A	anal problem	0.00010911	0.36841	0.416174	5.948e-08	0.974209
rs735665	123361397	G	anal problem	0.00034484	0.021882	0.1935	0.5965	genotyped
rs73718779	2969278	C	anal problem	-0.00024416	0.21105	0.1042	0.0001314	genotyped
rs757978	242371101	C	anal problem	0.0001349	0.48075	0.1079	0.8308	genotyped
rs7944004	2311152	G	anal problem	3.7944e-05	0.75202	0.495364	0.1036	0.972788
rs8024033	40403657	G	anal problem	-5.1773e-06	0.96539	0.497166	0.6465	0.986833
rs872071	411064	G	anal problem	-0.00011467	0.33353	0.4714	0.002756	genotyped
rs898518	109016824	A	anal problem	4.8526e-05	0.68701	0.420442	0.6663	0.9953
rs9273012	32611641	G	anal problem	0.00011539	0.41542	0.247394	7.827e-08	0.931867
rs9273363	32626272	C	anal problem	-0.00025162	0.052079	0.3017	0.008396	genotyped
rs9308731	111908262	A	anal problem	0.00016313	0.17241	0.451626	0.8251	0.992825
rs9815073	188115682	A	anal problem	-3.8791e-05	0.76547	0.343033	0.6382	0.920506
rs9880772	27777779	A	anal problem	-1.5105e-05	0.89932	0.45231	0.2082	0.993472
rs10069690	1279790	C	angina	0.0003215	0.42842	0.2574	0.4474	genotyped
rs10936599	169492101	C	angina	-0.00024235	0.55782	0.244	0.1286	genotyped
rs13397985	231091223	T	angina	0.000149	0.74344	0.189	0.3714	genotyped
rs13401811	111616104	A	angina	-0.00058009	0.20552	0.184757	0.4785	0.997125
rs1679013	22206987	T	angina	0.00051451	0.16872	0.460621	0.6164	0.901667
rs17246404	124462661	T	angina	0.00030919	0.43341	0.281925	0.07283	0.99983
rs17483466	111797458	A	angina	-0.00019038	0.6668	0.203	0.1932	genotyped
rs210134	33540209	G	angina	0.00015774	0.6809	0.3119	0.8643	genotyped
rs2236256	154478440	A	angina	6.501e-05	0.85591	0.455858	0.1429	0.988131
rs2466024	128188019	A	angina	-0.00074875	0.037923	0.411781	0.5124	0.995702
rs2511714	103578874	G	angina	7.945e-05	0.82735	0.402526	0.8305	0.982624
rs305061	85975659	T	angina	-7.5896e-05	0.83951	0.3395	0.5962	genotyped
rs3769825	202111380	G	angina	8.3619e-05	0.81602	0.4289	0.08893	genotyped
rs391525	85944439	A	angina	0.00011395	0.76169	0.3379	0.1393	genotyped
rs4406737	90759724	G	angina	-0.00052153	0.1459	0.4366	0.9501	0.9932
rs4987852	60793921	T	angina	-5.4382e-05	0.93791	0.06935	0.188	genotyped
rs7169431	56340896	G	angina	0.00071408	0.26784	0.0824585	0.4617	1
rs7176508	70018990	G	angina	0.00060646	0.096193	0.385	0.8144	genotyped
rs7231647	57628926	A	angina	0.00016671	0.64559	0.416174	5.948e-08	0.974209
rs735665	123361397	G	angina	-0.00033429	0.45721	0.1935	0.5965	genotyped
rs73718779	2969278	C	angina	-6.3114e-05	0.91398	0.1042	0.0001314	genotyped
rs757978	242371101	C	angina	-0.00057024	0.31905	0.1079	0.8308	genotyped
rs7944004	2311152	G	angina	0.00037324	0.29842	0.495364	0.1036	0.972788
rs8024033	40403657	G	angina	0.00017931	0.61499	0.497166	0.6465	0.986833
rs872071	411064	G	angina	-9.7875e-05	0.7827	0.4714	0.002756	genotyped
rs898518	109016824	A	angina	-0.00051472	0.15299	0.420442	0.6663	0.9953
rs9273012	32611641	G	angina	0.00011603	0.78436	0.247394	7.827e-08	0.931867
rs9273363	32626272	C	angina	-0.00024851	0.52149	0.3017	0.008396	genotyped
rs9308731	111908262	A	angina	-0.00052566	0.1416	0.451626	0.8251	0.992825
rs9815073	188115682	A	angina	0.00033277	0.39201	0.343033	0.6382	0.920506
rs9880772	27777779	A	angina	0.00052064	0.14462	0.45231	0.2082	0.993472
rs10069690	1279790	C	ankylosing spondylitis	-3.3268e-05	0.78908	0.2574	0.4474	genotyped
rs10936599	169492101	C	ankylosing spondylitis	9.5589e-05	0.45026	0.244	0.1286	genotyped
rs13397985	231091223	T	ankylosing spondylitis	-0.00025954	0.062514	0.189	0.3714	genotyped
rs13401811	111616104	A	ankylosing spondylitis	0.00015547	0.26765	0.184757	0.4785	0.997125
rs1679013	22206987	T	ankylosing spondylitis	0.000132	0.24855	0.460621	0.6164	0.901667
rs17246404	124462661	T	ankylosing spondylitis	-0.00012344	0.30722	0.281925	0.07283	0.99983
rs17483466	111797458	A	ankylosing spondylitis	4.8479e-05	0.7202	0.203	0.1932	genotyped
rs210134	33540209	G	ankylosing spondylitis	-2.4004e-05	0.84073	0.3119	0.8643	genotyped
rs2236256	154478440	A	ankylosing spondylitis	7.3494e-05	0.50979	0.455858	0.1429	0.988131
rs2466024	128188019	A	ankylosing spondylitis	-0.00012425	0.26079	0.411781	0.5124	0.995702
rs2511714	103578874	G	ankylosing spondylitis	-0.00015695	0.15952	0.402526	0.8305	0.982624
rs305061	85975659	T	ankylosing spondylitis	0.00026137	0.022791	0.3395	0.5962	genotyped
rs3769825	202111380	G	ankylosing spondylitis	2.3866e-05	0.82825	0.4289	0.08893	genotyped
rs391525	85944439	A	ankylosing spondylitis	-0.00011362	0.32354	0.3379	0.1393	genotyped
rs4406737	90759724	G	ankylosing spondylitis	0.00019345	0.078217	0.4366	0.9501	0.9932
rs4987852	60793921	T	ankylosing spondylitis	5.564e-05	0.79473	0.06935	0.188	genotyped
rs7169431	56340896	G	ankylosing spondylitis	9.5584e-05	0.62816	0.0824585	0.4617	1
rs7176508	70018990	G	ankylosing spondylitis	8.4042e-05	0.45158	0.385	0.8144	genotyped
rs7231647	57628926	A	ankylosing spondylitis	1.9685e-05	0.85928	0.416174	5.948e-08	0.974209
rs735665	123361397	G	ankylosing spondylitis	-8.4656e-06	0.95098	0.1935	0.5965	genotyped
rs73718779	2969278	C	ankylosing spondylitis	-5.3714e-05	0.76783	0.1042	0.0001314	genotyped
rs757978	242371101	C	ankylosing spondylitis	8.1852e-05	0.64031	0.1079	0.8308	genotyped
rs7944004	2311152	G	ankylosing spondylitis	-0.00028697	0.0090368	0.495364	0.1036	0.972788
rs8024033	40403657	G	ankylosing spondylitis	-5.158e-05	0.63662	0.497166	0.6465	0.986833
rs872071	411064	G	ankylosing spondylitis	2.52e-05	0.81962	0.4714	0.002756	genotyped
rs898518	109016824	A	ankylosing spondylitis	0.00016541	0.13361	0.420442	0.6663	0.9953
rs9273012	32611641	G	ankylosing spondylitis	-3.3678e-05	0.79869	0.247394	7.827e-08	0.931867
rs9273363	32626272	C	ankylosing spondylitis	0.00017612	0.14459	0.3017	0.008396	genotyped
rs9308731	111908262	A	ankylosing spondylitis	-7.3501e-05	0.50193	0.451626	0.8251	0.992825
rs9815073	188115682	A	ankylosing spondylitis	8.9046e-06	0.94037	0.343033	0.6382	0.920506
rs9880772	27777779	A	ankylosing spondylitis	0.00028698	0.0086361	0.45231	0.2082	0.993472
rs10069690	1279790	C	anxiety/panic attacks	4.8498e-05	0.86218	0.2574	0.4474	genotyped
rs10936599	169492101	C	anxiety/panic attacks	-0.00010351	0.7161	0.244	0.1286	genotyped
rs13397985	231091223	T	anxiety/panic attacks	0.00068004	0.02987	0.189	0.3714	genotyped
rs13401811	111616104	A	anxiety/panic attacks	0.00026367	0.40283	0.184757	0.4785	0.997125
rs1679013	22206987	T	anxiety/panic attacks	-0.00051261	0.046177	0.460621	0.6164	0.901667
rs17246404	124462661	T	anxiety/panic attacks	-0.00026189	0.33513	0.281925	0.07283	0.99983
rs17483466	111797458	A	anxiety/panic attacks	0.00014181	0.64104	0.203	0.1932	genotyped
rs210134	33540209	G	anxiety/panic attacks	0.00068681	0.0091666	0.3119	0.8643	genotyped
rs2236256	154478440	A	anxiety/panic attacks	0.0001664	0.49881	0.455858	0.1429	0.988131
rs2466024	128188019	A	anxiety/panic attacks	-0.00010779	0.66418	0.411781	0.5124	0.995702
rs2511714	103578874	G	anxiety/panic attacks	-0.00014603	0.56028	0.402526	0.8305	0.982624
rs305061	85975659	T	anxiety/panic attacks	-0.00020013	0.43775	0.3395	0.5962	genotyped
rs3769825	202111380	G	anxiety/panic attacks	0.0002132	0.38846	0.4289	0.08893	genotyped
rs391525	85944439	A	anxiety/panic attacks	0.00027188	0.29307	0.3379	0.1393	genotyped
rs4406737	90759724	G	anxiety/panic attacks	-0.0002043	0.40798	0.4366	0.9501	0.9932
rs4987852	60793921	T	anxiety/panic attacks	0.00016892	0.72527	0.06935	0.188	genotyped
rs7169431	56340896	G	anxiety/panic attacks	-0.00022606	0.61036	0.0824585	0.4617	1
rs7176508	70018990	G	anxiety/panic attacks	0.00013893	0.57986	0.385	0.8144	genotyped
rs7231647	57628926	A	anxiety/panic attacks	0.0002342	0.348	0.416174	5.948e-08	0.974209
rs735665	123361397	G	anxiety/panic attacks	-0.00010194	0.74182	0.1935	0.5965	genotyped
rs73718779	2969278	C	anxiety/panic attacks	-0.0002006	0.61731	0.1042	0.0001314	genotyped
rs757978	242371101	C	anxiety/panic attacks	3.6093e-05	0.92695	0.1079	0.8308	genotyped
rs7944004	2311152	G	anxiety/panic attacks	3.6661e-07	0.99882	0.495364	0.1036	0.972788
rs8024033	40403657	G	anxiety/panic attacks	0.00021396	0.38331	0.497166	0.6465	0.986833
rs872071	411064	G	anxiety/panic attacks	-9.8757e-05	0.68549	0.4714	0.002756	genotyped
rs898518	109016824	A	anxiety/panic attacks	-5.4826e-05	0.82487	0.420442	0.6663	0.9953
rs9273012	32611641	G	anxiety/panic attacks	-0.00012588	0.66573	0.247394	7.827e-08	0.931867
rs9273363	32626272	C	anxiety/panic attacks	-0.00032426	0.2235	0.3017	0.008396	genotyped
rs9308731	111908262	A	anxiety/panic attacks	4.0379e-06	0.9869	0.451626	0.8251	0.992825
rs9815073	188115682	A	anxiety/panic attacks	0.00012689	0.63537	0.343033	0.6382	0.920506
rs9880772	27777779	A	anxiety/panic attacks	-0.00030857	0.20908	0.45231	0.2082	0.993472
rs10069690	1279790	C	appendicitis	0.00028772	0.18411	0.2574	0.4474	genotyped
rs10936599	169492101	C	appendicitis	8.8374e-05	0.6888	0.244	0.1286	genotyped
rs13397985	231091223	T	appendicitis	-9.1443e-06	0.96995	0.189	0.3714	genotyped
rs13401811	111616104	A	appendicitis	-0.00023898	0.32799	0.184757	0.4785	0.997125
rs1679013	22206987	T	appendicitis	-0.00027448	0.16859	0.460621	0.6164	0.901667
rs17246404	124462661	T	appendicitis	0.00013488	0.52193	0.281925	0.07283	0.99983
rs17483466	111797458	A	appendicitis	4.8792e-05	0.83605	0.203	0.1932	genotyped
rs210134	33540209	G	appendicitis	-7.4724e-05	0.71465	0.3119	0.8643	genotyped
rs2236256	154478440	A	appendicitis	-7.3784e-05	0.69892	0.455858	0.1429	0.988131
rs2466024	128188019	A	appendicitis	-0.00011631	0.54559	0.411781	0.5124	0.995702
rs2511714	103578874	G	appendicitis	0.00010025	0.60596	0.402526	0.8305	0.982624
rs305061	85975659	T	appendicitis	-0.00018243	0.36176	0.3395	0.5962	genotyped
rs3769825	202111380	G	appendicitis	-0.00010832	0.5719	0.4289	0.08893	genotyped
rs391525	85944439	A	appendicitis	1.1166e-05	0.9556	0.3379	0.1393	genotyped
rs4406737	90759724	G	appendicitis	-0.00010759	0.57409	0.4366	0.9501	0.9932
rs4987852	60793921	T	appendicitis	4.378e-05	0.90648	0.06935	0.188	genotyped
rs7169431	56340896	G	appendicitis	0.00071685	0.037155	0.0824585	0.4617	1
rs7176508	70018990	G	appendicitis	-1.6955e-05	0.93056	0.385	0.8144	genotyped
rs7231647	57628926	A	appendicitis	0.00021148	0.2744	0.416174	5.948e-08	0.974209
rs735665	123361397	G	appendicitis	-0.00040839	0.088581	0.1935	0.5965	genotyped
rs73718779	2969278	C	appendicitis	0.00036567	0.24014	0.1042	0.0001314	genotyped
rs757978	242371101	C	appendicitis	0.00019681	0.51894	0.1079	0.8308	genotyped
rs7944004	2311152	G	appendicitis	0.00032626	0.088335	0.495364	0.1036	0.972788
rs8024033	40403657	G	appendicitis	-0.00015391	0.4186	0.497166	0.6465	0.986833
rs872071	411064	G	appendicitis	-0.0001681	0.37399	0.4714	0.002756	genotyped
rs898518	109016824	A	appendicitis	-6.8959e-05	0.71973	0.420442	0.6663	0.9953
rs9273012	32611641	G	appendicitis	-2.3818e-05	0.91604	0.247394	7.827e-08	0.931867
rs9273363	32626272	C	appendicitis	-0.00015723	0.44652	0.3017	0.008396	genotyped
rs9308731	111908262	A	appendicitis	0.00037534	0.049025	0.451626	0.8251	0.992825
rs9815073	188115682	A	appendicitis	-0.00043439	0.036273	0.343033	0.6382	0.920506
rs9880772	27777779	A	appendicitis	0.00019972	0.29435	0.45231	0.2082	0.993472
rs10069690	1279790	C	Arm fat mass (left)	0.00038505	0.77531	0.2574	0.4474	genotyped
rs10936599	169492101	C	Arm fat mass (left)	0.00082189	0.55047	0.244	0.1286	genotyped
rs13397985	231091223	T	Arm fat mass (left)	0.0014756	0.33159	0.189	0.3714	genotyped
rs13401811	111616104	A	Arm fat mass (left)	-0.0014339	0.34858	0.184757	0.4785	0.997125
rs1679013	22206987	T	Arm fat mass (left)	-0.0042817	0.00053518	0.460621	0.6164	0.901667
rs17246404	124462661	T	Arm fat mass (left)	0.0018085	0.16698	0.281925	0.07283	0.99983
rs17483466	111797458	A	Arm fat mass (left)	-0.0014811	0.31572	0.203	0.1932	genotyped
rs210134	33540209	G	Arm fat mass (left)	-0.00071301	0.57571	0.3119	0.8643	genotyped
rs2236256	154478440	A	Arm fat mass (left)	-0.0009139	0.44218	0.455858	0.1429	0.988131
rs2466024	128188019	A	Arm fat mass (left)	0.00030098	0.80114	0.411781	0.5124	0.995702
rs2511714	103578874	G	Arm fat mass (left)	-0.00014317	0.90556	0.402526	0.8305	0.982624
rs305061	85975659	T	Arm fat mass (left)	0.00043341	0.72728	0.3395	0.5962	genotyped
rs3769825	202111380	G	Arm fat mass (left)	-0.00082858	0.48984	0.4289	0.08893	genotyped
rs391525	85944439	A	Arm fat mass (left)	-0.001507	0.2265	0.3379	0.1393	genotyped
rs4406737	90759724	G	Arm fat mass (left)	-0.00019458	0.8699	0.4366	0.9501	0.9932
rs4987852	60793921	T	Arm fat mass (left)	0.00029559	0.89812	0.06935	0.188	genotyped
rs7169431	56340896	G	Arm fat mass (left)	0.00036921	0.86231	0.0824585	0.4617	1
rs7176508	70018990	G	Arm fat mass (left)	0.0010499	0.3833	0.385	0.8144	genotyped
rs7231647	57628926	A	Arm fat mass (left)	0.0015787	0.18783	0.416174	5.948e-08	0.974209
rs735665	123361397	G	Arm fat mass (left)	0.0017872	0.23036	0.1935	0.5965	genotyped
rs73718779	2969278	C	Arm fat mass (left)	-0.0022102	0.25473	0.1042	0.0001314	genotyped
rs757978	242371101	C	Arm fat mass (left)	-0.0055431	0.0037164	0.1079	0.8308	genotyped
rs7944004	2311152	G	Arm fat mass (left)	0.0017818	0.13413	0.495364	0.1036	0.972788
rs8024033	40403657	G	Arm fat mass (left)	-0.0028143	0.016858	0.497166	0.6465	0.986833
rs872071	411064	G	Arm fat mass (left)	0.0037253	0.0015744	0.4714	0.002756	genotyped
rs898518	109016824	A	Arm fat mass (left)	8.7685e-05	0.94148	0.420442	0.6663	0.9953
rs9273012	32611641	G	Arm fat mass (left)	0.0059457	2.4247e-05	0.247394	7.827e-08	0.931867
rs9273363	32626272	C	Arm fat mass (left)	-0.0070566	4.2379e-08	0.3017	0.008396	genotyped
rs9308731	111908262	A	Arm fat mass (left)	0.0030278	0.011211	0.451626	0.8251	0.992825
rs9815073	188115682	A	Arm fat mass (left)	0.0022261	0.085424	0.343033	0.6382	0.920506
rs9880772	27777779	A	Arm fat mass (left)	0.0029675	0.012504	0.45231	0.2082	0.993472
rs10069690	1279790	C	Arm fat mass (right)	0.00012295	0.91893	0.2574	0.4474	genotyped
rs10936599	169492101	C	Arm fat mass (right)	0.00096544	0.43356	0.244	0.1286	genotyped
rs13397985	231091223	T	Arm fat mass (right)	0.0013216	0.33149	0.189	0.3714	genotyped
rs13401811	111616104	A	Arm fat mass (right)	-0.0014405	0.29301	0.184757	0.4785	0.997125
rs1679013	22206987	T	Arm fat mass (right)	-0.0040321	0.00027107	0.460621	0.6164	0.901667
rs17246404	124462661	T	Arm fat mass (right)	0.0015769	0.1784	0.281925	0.07283	0.99983
rs17483466	111797458	A	Arm fat mass (right)	-0.0010727	0.41709	0.203	0.1932	genotyped
rs210134	33540209	G	Arm fat mass (right)	-0.00054519	0.63269	0.3119	0.8643	genotyped
rs2236256	154478440	A	Arm fat mass (right)	-0.00074671	0.48312	0.455858	0.1429	0.988131
rs2466024	128188019	A	Arm fat mass (right)	0.00043119	0.68697	0.411781	0.5124	0.995702
rs2511714	103578874	G	Arm fat mass (right)	0.00022183	0.83734	0.402526	0.8305	0.982624
rs305061	85975659	T	Arm fat mass (right)	0.00060245	0.5882	0.3395	0.5962	genotyped
rs3769825	202111380	G	Arm fat mass (right)	-0.00073154	0.49597	0.4289	0.08893	genotyped
rs391525	85944439	A	Arm fat mass (right)	-0.0014146	0.2048	0.3379	0.1393	genotyped
rs4406737	90759724	G	Arm fat mass (right)	-0.00014701	0.89008	0.4366	0.9501	0.9932
rs4987852	60793921	T	Arm fat mass (right)	4.1496e-07	0.99984	0.06935	0.188	genotyped
rs7169431	56340896	G	Arm fat mass (right)	0.00052204	0.78418	0.0824585	0.4617	1
rs7176508	70018990	G	Arm fat mass (right)	0.0009635	0.37154	0.385	0.8144	genotyped
rs7231647	57628926	A	Arm fat mass (right)	0.0013237	0.2174	0.416174	5.948e-08	0.974209
rs735665	123361397	G	Arm fat mass (right)	0.0013221	0.3217	0.1935	0.5965	genotyped
rs73718779	2969278	C	Arm fat mass (right)	-0.0022785	0.18975	0.1042	0.0001314	genotyped
rs757978	242371101	C	Arm fat mass (right)	-0.0046937	0.0060814	0.1079	0.8308	genotyped
rs7944004	2311152	G	Arm fat mass (right)	0.0016971	0.11106	0.495364	0.1036	0.972788
rs8024033	40403657	G	Arm fat mass (right)	-0.0026383	0.012347	0.497166	0.6465	0.986833
rs872071	411064	G	Arm fat mass (right)	0.0032354	0.0021718	0.4714	0.002756	genotyped
rs898518	109016824	A	Arm fat mass (right)	0.00010533	0.92155	0.420442	0.6663	0.9953
rs9273012	32611641	G	Arm fat mass (right)	0.0052588	3.0414e-05	0.247394	7.827e-08	0.931867
rs9273363	32626272	C	Arm fat mass (right)	-0.0062368	6.3049e-08	0.3017	0.008396	genotyped
rs9308731	111908262	A	Arm fat mass (right)	0.0027591	0.0098625	0.451626	0.8251	0.992825
rs9815073	188115682	A	Arm fat mass (right)	0.0022206	0.055377	0.343033	0.6382	0.920506
rs9880772	27777779	A	Arm fat mass (right)	0.0024366	0.022025	0.45231	0.2082	0.993472
rs10069690	1279790	C	Arm fat percentage (left)	0.0088746	0.54835	0.2574	0.4474	genotyped
rs10936599	169492101	C	Arm fat percentage (left)	-0.0032616	0.82884	0.244	0.1286	genotyped
rs13397985	231091223	T	Arm fat percentage (left)	0.017556	0.2925	0.189	0.3714	genotyped
rs13401811	111616104	A	Arm fat percentage (left)	-0.029698	0.076883	0.184757	0.4785	0.997125
rs1679013	22206987	T	Arm fat percentage (left)	-0.038857	0.0041591	0.460621	0.6164	0.901667
rs17246404	124462661	T	Arm fat percentage (left)	0.017517	0.22202	0.281925	0.07283	0.99983
rs17483466	111797458	A	Arm fat percentage (left)	-0.033826	0.036796	0.203	0.1932	genotyped
rs210134	33540209	G	Arm fat percentage (left)	-0.018972	0.17416	0.3119	0.8643	genotyped
rs2236256	154478440	A	Arm fat percentage (left)	-0.015906	0.22224	0.455858	0.1429	0.988131
rs2466024	128188019	A	Arm fat percentage (left)	0.0029782	0.8201	0.411781	0.5124	0.995702
rs2511714	103578874	G	Arm fat percentage (left)	0.00010934	0.9934	0.402526	0.8305	0.982624
rs305061	85975659	T	Arm fat percentage (left)	0.0086176	0.52658	0.3395	0.5962	genotyped
rs3769825	202111380	G	Arm fat percentage (left)	0.0031394	0.81155	0.4289	0.08893	genotyped
rs391525	85944439	A	Arm fat percentage (left)	-0.0095427	0.48432	0.3379	0.1393	genotyped
rs4406737	90759724	G	Arm fat percentage (left)	-0.0022474	0.86298	0.4366	0.9501	0.9932
rs4987852	60793921	T	Arm fat percentage (left)	-0.024731	0.32801	0.06935	0.188	genotyped
rs7169431	56340896	G	Arm fat percentage (left)	0.0046122	0.84333	0.0824585	0.4617	1
rs7176508	70018990	G	Arm fat percentage (left)	0.0061656	0.64045	0.385	0.8144	genotyped
rs7231647	57628926	A	Arm fat percentage (left)	0.0065965	0.61531	0.416174	5.948e-08	0.974209
rs735665	123361397	G	Arm fat percentage (left)	0.016693	0.30678	0.1935	0.5965	genotyped
rs73718779	2969278	C	Arm fat percentage (left)	-0.022607	0.28774	0.1042	0.0001314	genotyped
rs757978	242371101	C	Arm fat percentage (left)	-0.031542	0.13248	0.1079	0.8308	genotyped
rs7944004	2311152	G	Arm fat percentage (left)	0.010977	0.39985	0.495364	0.1036	0.972788
rs8024033	40403657	G	Arm fat percentage (left)	-0.025922	0.044652	0.497166	0.6465	0.986833
rs872071	411064	G	Arm fat percentage (left)	0.051315	7.1013e-05	0.4714	0.002756	genotyped
rs898518	109016824	A	Arm fat percentage (left)	0.024723	0.059022	0.420442	0.6663	0.9953
rs9273012	32611641	G	Arm fat percentage (left)	0.039349	0.010785	0.247394	7.827e-08	0.931867
rs9273363	32626272	C	Arm fat percentage (left)	-0.06003	2.0952e-05	0.3017	0.008396	genotyped
rs9308731	111908262	A	Arm fat percentage (left)	0.025163	0.054796	0.451626	0.8251	0.992825
rs9815073	188115682	A	Arm fat percentage (left)	0.026604	0.060709	0.343033	0.6382	0.920506
rs9880772	27777779	A	Arm fat percentage (left)	0.028789	0.027043	0.45231	0.2082	0.993472
rs10069690	1279790	C	Arm fat percentage (right)	0.0060027	0.68304	0.2574	0.4474	genotyped
rs10936599	169492101	C	Arm fat percentage (right)	-0.0019424	0.89696	0.244	0.1286	genotyped
rs13397985	231091223	T	Arm fat percentage (right)	0.014171	0.39279	0.189	0.3714	genotyped
rs13401811	111616104	A	Arm fat percentage (right)	-0.025786	0.12238	0.184757	0.4785	0.997125
rs1679013	22206987	T	Arm fat percentage (right)	-0.045558	0.00072759	0.460621	0.6164	0.901667
rs17246404	124462661	T	Arm fat percentage (right)	0.020768	0.14537	0.281925	0.07283	0.99983
rs17483466	111797458	A	Arm fat percentage (right)	-0.027275	0.090402	0.203	0.1932	genotyped
rs210134	33540209	G	Arm fat percentage (right)	-0.015146	0.27506	0.3119	0.8643	genotyped
rs2236256	154478440	A	Arm fat percentage (right)	-0.0099966	0.44026	0.455858	0.1429	0.988131
rs2466024	128188019	A	Arm fat percentage (right)	0.0040859	0.75368	0.411781	0.5124	0.995702
rs2511714	103578874	G	Arm fat percentage (right)	0.0042168	0.74845	0.402526	0.8305	0.982624
rs305061	85975659	T	Arm fat percentage (right)	0.010552	0.43544	0.3395	0.5962	genotyped
rs3769825	202111380	G	Arm fat percentage (right)	0.0017317	0.89477	0.4289	0.08893	genotyped
rs391525	85944439	A	Arm fat percentage (right)	-0.010622	0.43361	0.3379	0.1393	genotyped
rs4406737	90759724	G	Arm fat percentage (right)	-0.0019696	0.87908	0.4366	0.9501	0.9932
rs4987852	60793921	T	Arm fat percentage (right)	-0.019322	0.4422	0.06935	0.188	genotyped
rs7169431	56340896	G	Arm fat percentage (right)	0.0086146	0.71045	0.0824585	0.4617	1
rs7176508	70018990	G	Arm fat percentage (right)	0.0078628	0.54915	0.385	0.8144	genotyped
rs7231647	57628926	A	Arm fat percentage (right)	0.0072695	0.57761	0.416174	5.948e-08	0.974209
rs735665	123361397	G	Arm fat percentage (right)	0.010098	0.53405	0.1935	0.5965	genotyped
rs73718779	2969278	C	Arm fat percentage (right)	-0.023075	0.27499	0.1042	0.0001314	genotyped
rs757978	242371101	C	Arm fat percentage (right)	-0.028746	0.16793	0.1079	0.8308	genotyped
rs7944004	2311152	G	Arm fat percentage (right)	0.0095154	0.46293	0.495364	0.1036	0.972788
rs8024033	40403657	G	Arm fat percentage (right)	-0.029456	0.021747	0.497166	0.6465	0.986833
rs872071	411064	G	Arm fat percentage (right)	0.048359	0.0001654	0.4714	0.002756	genotyped
rs898518	109016824	A	Arm fat percentage (right)	0.024376	0.061177	0.420442	0.6663	0.9953
rs9273012	32611641	G	Arm fat percentage (right)	0.036222	0.018217	0.247394	7.827e-08	0.931867
rs9273363	32626272	C	Arm fat percentage (right)	-0.054817	9.2838e-05	0.3017	0.008396	genotyped
rs9308731	111908262	A	Arm fat percentage (right)	0.021977	0.091615	0.451626	0.8251	0.992825
rs9815073	188115682	A	Arm fat percentage (right)	0.027992	0.047137	0.343033	0.6382	0.920506
rs9880772	27777779	A	Arm fat percentage (right)	0.026683	0.039284	0.45231	0.2082	0.993472
rs10069690	1279790	C	Arm fat-free mass (left)	-0.00095573	0.27804	0.2574	0.4474	genotyped
rs10936599	169492101	C	Arm fat-free mass (left)	0.0025853	0.004029	0.244	0.1286	genotyped
rs13397985	231091223	T	Arm fat-free mass (left)	0.00096292	0.33288	0.189	0.3714	genotyped
rs13401811	111616104	A	Arm fat-free mass (left)	0.0014299	0.15313	0.184757	0.4785	0.997125
rs1679013	22206987	T	Arm fat-free mass (left)	-0.0032854	4.6777e-05	0.460621	0.6164	0.901667
rs17246404	124462661	T	Arm fat-free mass (left)	0.0010878	0.2033	0.281925	0.07283	0.99983
rs17483466	111797458	A	Arm fat-free mass (left)	0.0019583	0.042624	0.203	0.1932	genotyped
rs210134	33540209	G	Arm fat-free mass (left)	0.0015919	0.056423	0.3119	0.8643	genotyped
rs2236256	154478440	A	Arm fat-free mass (left)	-0.00031128	0.6894	0.455858	0.1429	0.988131
rs2466024	128188019	A	Arm fat-free mass (left)	0.0010201	0.19111	0.411781	0.5124	0.995702
rs2511714	103578874	G	Arm fat-free mass (left)	0.00078409	0.31973	0.402526	0.8305	0.982624
rs305061	85975659	T	Arm fat-free mass (left)	0.00039367	0.62715	0.3395	0.5962	genotyped
rs3769825	202111380	G	Arm fat-free mass (left)	-0.0020775	0.0081409	0.4289	0.08893	genotyped
rs391525	85944439	A	Arm fat-free mass (left)	-0.00064459	0.42763	0.3379	0.1393	genotyped
rs4406737	90759724	G	Arm fat-free mass (left)	-0.0003512	0.65069	0.4366	0.9501	0.9932
rs4987852	60793921	T	Arm fat-free mass (left)	0.0019024	0.20583	0.06935	0.188	genotyped
rs7169431	56340896	G	Arm fat-free mass (left)	0.00098312	0.47877	0.0824585	0.4617	1
rs7176508	70018990	G	Arm fat-free mass (left)	-0.00029061	0.71129	0.385	0.8144	genotyped
rs7231647	57628926	A	Arm fat-free mass (left)	0.0010055	0.19778	0.416174	5.948e-08	0.974209
rs735665	123361397	G	Arm fat-free mass (left)	-0.001029	0.28939	0.1935	0.5965	genotyped
rs73718779	2969278	C	Arm fat-free mass (left)	-0.0022647	0.074773	0.1042	0.0001314	genotyped
rs757978	242371101	C	Arm fat-free mass (left)	-0.0064456	2.5232e-07	0.1079	0.8308	genotyped
rs7944004	2311152	G	Arm fat-free mass (left)	0.0014138	0.06823	0.495364	0.1036	0.972788
rs8024033	40403657	G	Arm fat-free mass (left)	-0.00083067	0.27934	0.497166	0.6465	0.986833
rs872071	411064	G	Arm fat-free mass (left)	0.00044938	0.56049	0.4714	0.002756	genotyped
rs898518	109016824	A	Arm fat-free mass (left)	-0.002305	0.0031108	0.420442	0.6663	0.9953
rs9273012	32611641	G	Arm fat-free mass (left)	0.0045415	8.5031e-07	0.247394	7.827e-08	0.931867
rs9273363	32626272	C	Arm fat-free mass (left)	-0.0046535	3.4236e-08	0.3017	0.008396	genotyped
rs9308731	111908262	A	Arm fat-free mass (left)	0.0018766	0.016298	0.451626	0.8251	0.992825
rs9815073	188115682	A	Arm fat-free mass (left)	0.0016872	0.045908	0.343033	0.6382	0.920506
rs9880772	27777779	A	Arm fat-free mass (left)	0.0022401	0.003888	0.45231	0.2082	0.993472
rs10069690	1279790	C	Arm fat-free mass (right)	-0.00058385	0.48017	0.2574	0.4474	genotyped
rs10936599	169492101	C	Arm fat-free mass (right)	0.002266	0.0072274	0.244	0.1286	genotyped
rs13397985	231091223	T	Arm fat-free mass (right)	0.00085876	0.35737	0.189	0.3714	genotyped
rs13401811	111616104	A	Arm fat-free mass (right)	0.0011111	0.23677	0.184757	0.4785	0.997125
rs1679013	22206987	T	Arm fat-free mass (right)	-0.002549	0.00076577	0.460621	0.6164	0.901667
rs17246404	124462661	T	Arm fat-free mass (right)	0.00066906	0.40444	0.281925	0.07283	0.99983
rs17483466	111797458	A	Arm fat-free mass (right)	0.0014936	0.099358	0.203	0.1932	genotyped
rs210134	33540209	G	Arm fat-free mass (right)	0.0014086	0.072096	0.3119	0.8643	genotyped
rs2236256	154478440	A	Arm fat-free mass (right)	-0.0006576	0.36836	0.455858	0.1429	0.988131
rs2466024	128188019	A	Arm fat-free mass (right)	0.00071056	0.33192	0.411781	0.5124	0.995702
rs2511714	103578874	G	Arm fat-free mass (right)	0.00030351	0.68152	0.402526	0.8305	0.982624
rs305061	85975659	T	Arm fat-free mass (right)	5.4661e-05	0.94272	0.3395	0.5962	genotyped
rs3769825	202111380	G	Arm fat-free mass (right)	-0.0019665	0.0075945	0.4289	0.08893	genotyped
rs391525	85944439	A	Arm fat-free mass (right)	-0.00043933	0.56462	0.3379	0.1393	genotyped
rs4406737	90759724	G	Arm fat-free mass (right)	-0.00021911	0.76343	0.4366	0.9501	0.9932
rs4987852	60793921	T	Arm fat-free mass (right)	0.0019778	0.16113	0.06935	0.188	genotyped
rs7169431	56340896	G	Arm fat-free mass (right)	0.00072076	0.5801	0.0824585	0.4617	1
rs7176508	70018990	G	Arm fat-free mass (right)	-0.00048919	0.50682	0.385	0.8144	genotyped
rs7231647	57628926	A	Arm fat-free mass (right)	0.0010119	0.16733	0.416174	5.948e-08	0.974209
rs735665	123361397	G	Arm fat-free mass (right)	-0.00053553	0.55687	0.1935	0.5965	genotyped
rs73718779	2969278	C	Arm fat-free mass (right)	-0.0023253	0.051275	0.1042	0.0001314	genotyped
rs757978	242371101	C	Arm fat-free mass (right)	-0.0058811	5.3341e-07	0.1079	0.8308	genotyped
rs7944004	2311152	G	Arm fat-free mass (right)	0.0014161	0.051638	0.495364	0.1036	0.972788
rs8024033	40403657	G	Arm fat-free mass (right)	-0.00049514	0.49207	0.497166	0.6465	0.986833
rs872071	411064	G	Arm fat-free mass (right)	0.0005461	0.45105	0.4714	0.002756	genotyped
rs898518	109016824	A	Arm fat-free mass (right)	-0.0020134	0.005921	0.420442	0.6663	0.9953
rs9273012	32611641	G	Arm fat-free mass (right)	0.0041187	1.9626e-06	0.247394	7.827e-08	0.931867
rs9273363	32626272	C	Arm fat-free mass (right)	-0.0046085	5.8036e-09	0.3017	0.008396	genotyped
rs9308731	111908262	A	Arm fat-free mass (right)	0.0020224	0.0057959	0.451626	0.8251	0.992825
rs9815073	188115682	A	Arm fat-free mass (right)	0.0012344	0.11962	0.343033	0.6382	0.920506
rs9880772	27777779	A	Arm fat-free mass (right)	0.0021297	0.003444	0.45231	0.2082	0.993472
rs10069690	1279790	C	Arm predicted mass (left)	-0.00083502	0.31477	0.2574	0.4474	genotyped
rs10936599	169492101	C	Arm predicted mass (left)	0.0022858	0.0069959	0.244	0.1286	genotyped
rs13397985	231091223	T	Arm predicted mass (left)	0.00081822	0.38283	0.189	0.3714	genotyped
rs13401811	111616104	A	Arm predicted mass (left)	0.0014181	0.13293	0.184757	0.4785	0.997125
rs1679013	22206987	T	Arm predicted mass (left)	-0.0030481	6.1674e-05	0.460621	0.6164	0.901667
rs17246404	124462661	T	Arm predicted mass (left)	0.0011782	0.14389	0.281925	0.07283	0.99983
rs17483466	111797458	A	Arm predicted mass (left)	0.0019034	0.036617	0.203	0.1932	genotyped
rs210134	33540209	G	Arm predicted mass (left)	0.0013872	0.077846	0.3119	0.8643	genotyped
rs2236256	154478440	A	Arm predicted mass (left)	-0.00034305	0.64036	0.455858	0.1429	0.988131
rs2466024	128188019	A	Arm predicted mass (left)	0.00092572	0.20828	0.411781	0.5124	0.995702
rs2511714	103578874	G	Arm predicted mass (left)	0.00078011	0.2937	0.402526	0.8305	0.982624
rs305061	85975659	T	Arm predicted mass (left)	0.0002178	0.7756	0.3395	0.5962	genotyped
rs3769825	202111380	G	Arm predicted mass (left)	-0.0018983	0.010334	0.4289	0.08893	genotyped
rs391525	85944439	A	Arm predicted mass (left)	-0.00052365	0.49426	0.3379	0.1393	genotyped
rs4406737	90759724	G	Arm predicted mass (left)	-0.00018392	0.80142	0.4366	0.9501	0.9932
rs4987852	60793921	T	Arm predicted mass (left)	0.0019681	0.16505	0.06935	0.188	genotyped
rs7169431	56340896	G	Arm predicted mass (left)	0.00086865	0.50686	0.0824585	0.4617	1
rs7176508	70018990	G	Arm predicted mass (left)	-0.00034287	0.64326	0.385	0.8144	genotyped
rs7231647	57628926	A	Arm predicted mass (left)	0.00082604	0.26176	0.416174	5.948e-08	0.974209
rs735665	123361397	G	Arm predicted mass (left)	-0.00083438	0.3622	0.1935	0.5965	genotyped
rs73718779	2969278	C	Arm predicted mass (left)	-0.0020372	0.089112	0.1042	0.0001314	genotyped
rs757978	242371101	C	Arm predicted mass (left)	-0.0060337	3.0711e-07	0.1079	0.8308	genotyped
rs7944004	2311152	G	Arm predicted mass (left)	0.0013183	0.071322	0.495364	0.1036	0.972788
rs8024033	40403657	G	Arm predicted mass (left)	-0.00068951	0.34091	0.497166	0.6465	0.986833
rs872071	411064	G	Arm predicted mass (left)	0.00043528	0.5498	0.4714	0.002756	genotyped
rs898518	109016824	A	Arm predicted mass (left)	-0.0020498	0.0052908	0.420442	0.6663	0.9953
rs9273012	32611641	G	Arm predicted mass (left)	0.0042784	8.668e-07	0.247394	7.827e-08	0.931867
rs9273363	32626272	C	Arm predicted mass (left)	-0.0043607	4.1382e-08	0.3017	0.008396	genotyped
rs9308731	111908262	A	Arm predicted mass (left)	0.0016947	0.021406	0.451626	0.8251	0.992825
rs9815073	188115682	A	Arm predicted mass (left)	0.0015684	0.04903	0.343033	0.6382	0.920506
rs9880772	27777779	A	Arm predicted mass (left)	0.0021306	0.0035839	0.45231	0.2082	0.993472
rs10069690	1279790	C	Arm predicted mass (right)	-0.00059809	0.44293	0.2574	0.4474	genotyped
rs10936599	169492101	C	Arm predicted mass (right)	0.0020807	0.008881	0.244	0.1286	genotyped
rs13397985	231091223	T	Arm predicted mass (right)	0.00091318	0.29913	0.189	0.3714	genotyped
rs13401811	111616104	A	Arm predicted mass (right)	0.0010832	0.2211	0.184757	0.4785	0.997125
rs1679013	22206987	T	Arm predicted mass (right)	-0.0024346	0.0006504	0.460621	0.6164	0.901667
rs17246404	124462661	T	Arm predicted mass (right)	0.00074143	0.32702	0.281925	0.07283	0.99983
rs17483466	111797458	A	Arm predicted mass (right)	0.0013425	0.11607	0.203	0.1932	genotyped
rs210134	33540209	G	Arm predicted mass (right)	0.0012157	0.099607	0.3119	0.8643	genotyped
rs2236256	154478440	A	Arm predicted mass (right)	-0.00058681	0.39444	0.455858	0.1429	0.988131
rs2466024	128188019	A	Arm predicted mass (right)	0.00074547	0.28021	0.411781	0.5124	0.995702
rs2511714	103578874	G	Arm predicted mass (right)	0.00048104	0.49019	0.402526	0.8305	0.982624
rs305061	85975659	T	Arm predicted mass (right)	7.43e-05	0.91748	0.3395	0.5962	genotyped
rs3769825	202111380	G	Arm predicted mass (right)	-0.0018146	0.0089653	0.4289	0.08893	genotyped
rs391525	85944439	A	Arm predicted mass (right)	-0.00038601	0.59136	0.3379	0.1393	genotyped
rs4406737	90759724	G	Arm predicted mass (right)	-0.00018352	0.78913	0.4366	0.9501	0.9932
rs4987852	60793921	T	Arm predicted mass (right)	0.0018491	0.16455	0.06935	0.188	genotyped
rs7169431	56340896	G	Arm predicted mass (right)	0.00063288	0.60631	0.0824585	0.4617	1
rs7176508	70018990	G	Arm predicted mass (right)	-0.00038044	0.58394	0.385	0.8144	genotyped
rs7231647	57628926	A	Arm predicted mass (right)	0.00084519	0.2211	0.416174	5.948e-08	0.974209
rs735665	123361397	G	Arm predicted mass (right)	-0.00056989	0.50716	0.1935	0.5965	genotyped
rs73718779	2969278	C	Arm predicted mass (right)	-0.0020267	0.071494	0.1042	0.0001314	genotyped
rs757978	242371101	C	Arm predicted mass (right)	-0.0056248	3.6317e-07	0.1079	0.8308	genotyped
rs7944004	2311152	G	Arm predicted mass (right)	0.0013303	0.05243	0.495364	0.1036	0.972788
rs8024033	40403657	G	Arm predicted mass (right)	-0.00038733	0.56858	0.497166	0.6465	0.986833
rs872071	411064	G	Arm predicted mass (right)	0.00044272	0.51685	0.4714	0.002756	genotyped
rs898518	109016824	A	Arm predicted mass (right)	-0.0018579	0.0070582	0.420442	0.6663	0.9953
rs9273012	32611641	G	Arm predicted mass (right)	0.0038466	2.4355e-06	0.247394	7.827e-08	0.931867
rs9273363	32626272	C	Arm predicted mass (right)	-0.0042688	1.0552e-08	0.3017	0.008396	genotyped
rs9308731	111908262	A	Arm predicted mass (right)	0.0019155	0.0055653	0.451626	0.8251	0.992825
rs9815073	188115682	A	Arm predicted mass (right)	0.0011478	0.12471	0.343033	0.6382	0.920506
rs9880772	27777779	A	Arm predicted mass (right)	0.0019179	0.0051993	0.45231	0.2082	0.993472
rs10069690	1279790	C	arthritis (nos)	0.00028132	0.17427	0.2574	0.4474	genotyped
rs10936599	169492101	C	arthritis (nos)	-0.00019381	0.35794	0.244	0.1286	genotyped
rs13397985	231091223	T	arthritis (nos)	1.7843e-05	0.93868	0.189	0.3714	genotyped
rs13401811	111616104	A	arthritis (nos)	0.00026292	0.26013	0.184757	0.4785	0.997125
rs1679013	22206987	T	arthritis (nos)	0.00019179	0.31395	0.460621	0.6164	0.901667
rs17246404	124462661	T	arthritis (nos)	7.3186e-05	0.7162	0.281925	0.07283	0.99983
rs17483466	111797458	A	arthritis (nos)	6.0089e-05	0.78971	0.203	0.1932	genotyped
rs210134	33540209	G	arthritis (nos)	-0.00012252	0.53045	0.3119	0.8643	genotyped
rs2236256	154478440	A	arthritis (nos)	-6.9961e-05	0.70116	0.455858	0.1429	0.988131
rs2466024	128188019	A	arthritis (nos)	-2.0554e-05	0.91104	0.411781	0.5124	0.995702
rs2511714	103578874	G	arthritis (nos)	-0.00010307	0.57903	0.402526	0.8305	0.982624
rs305061	85975659	T	arthritis (nos)	0.000251	0.18926	0.3395	0.5962	genotyped
rs3769825	202111380	G	arthritis (nos)	-5.3906e-05	0.76849	0.4289	0.08893	genotyped
rs391525	85944439	A	arthritis (nos)	0.00032741	0.087645	0.3379	0.1393	genotyped
rs4406737	90759724	G	arthritis (nos)	3.3356e-05	0.85533	0.4366	0.9501	0.9932
rs4987852	60793921	T	arthritis (nos)	-0.00066817	0.060697	0.06935	0.188	genotyped
rs7169431	56340896	G	arthritis (nos)	0.00016983	0.60537	0.0824585	0.4617	1
rs7176508	70018990	G	arthritis (nos)	0.00011248	0.54521	0.385	0.8144	genotyped
rs7231647	57628926	A	arthritis (nos)	0.0002015	0.27594	0.416174	5.948e-08	0.974209
rs735665	123361397	G	arthritis (nos)	0.00022346	0.32975	0.1935	0.5965	genotyped
rs73718779	2969278	C	arthritis (nos)	0.00049619	0.095337	0.1042	0.0001314	genotyped
rs757978	242371101	C	arthritis (nos)	-0.00041396	0.15573	0.1079	0.8308	genotyped
rs7944004	2311152	G	arthritis (nos)	3.3549e-05	0.85457	0.495364	0.1036	0.972788
rs8024033	40403657	G	arthritis (nos)	-0.00013666	0.45229	0.497166	0.6465	0.986833
rs872071	411064	G	arthritis (nos)	0.00030565	0.090735	0.4714	0.002756	genotyped
rs898518	109016824	A	arthritis (nos)	-0.00052512	0.0042421	0.420442	0.6663	0.9953
rs9273012	32611641	G	arthritis (nos)	-0.00026438	0.22077	0.247394	7.827e-08	0.931867
rs9273363	32626272	C	arthritis (nos)	0.00026163	0.18503	0.3017	0.008396	genotyped
rs9308731	111908262	A	arthritis (nos)	-0.00012436	0.49495	0.451626	0.8251	0.992825
rs9815073	188115682	A	arthritis (nos)	0.00014989	0.44951	0.343033	0.6382	0.920506
rs9880772	27777779	A	arthritis (nos)	6.7953e-05	0.70882	0.45231	0.2082	0.993472
rs10069690	1279790	C	asthma	-0.0006046	0.40252	0.2574	0.4474	genotyped
rs10936599	169492101	C	asthma	-4.6479e-05	0.9496	0.244	0.1286	genotyped
rs13397985	231091223	T	asthma	0.00093307	0.24933	0.189	0.3714	genotyped
rs13401811	111616104	A	asthma	0.0018951	0.020101	0.184757	0.4785	0.997125
rs1679013	22206987	T	asthma	-0.00031782	0.63195	0.460621	0.6164	0.901667
rs17246404	124462661	T	asthma	-0.00028971	0.67937	0.281925	0.07283	0.99983
rs17483466	111797458	A	asthma	-0.00071896	0.36081	0.203	0.1932	genotyped
rs210134	33540209	G	asthma	-0.00077228	0.25774	0.3119	0.8643	genotyped
rs2236256	154478440	A	asthma	-0.00091412	0.15124	0.455858	0.1429	0.988131
rs2466024	128188019	A	asthma	-0.00066958	0.29561	0.411781	0.5124	0.995702
rs2511714	103578874	G	asthma	-0.00016558	0.79786	0.402526	0.8305	0.982624
rs305061	85975659	T	asthma	0.0008255	0.21475	0.3395	0.5962	genotyped
rs3769825	202111380	G	asthma	0.001227	0.055021	0.4289	0.08893	genotyped
rs391525	85944439	A	asthma	0.00017322	0.79514	0.3379	0.1393	genotyped
rs4406737	90759724	G	asthma	-0.00059088	0.35407	0.4366	0.9501	0.9932
rs4987852	60793921	T	asthma	-0.0024119	0.051493	0.06935	0.188	genotyped
rs7169431	56340896	G	asthma	0.0009663	0.39835	0.0824585	0.4617	1
rs7176508	70018990	G	asthma	-0.00077253	0.23261	0.385	0.8144	genotyped
rs7231647	57628926	A	asthma	-0.00051867	0.41991	0.416174	5.948e-08	0.974209
rs735665	123361397	G	asthma	1.3161e-05	0.98686	0.1935	0.5965	genotyped
rs73718779	2969278	C	asthma	-0.00077312	0.45699	0.1042	0.0001314	genotyped
rs757978	242371101	C	asthma	-0.00010752	0.91591	0.1079	0.8308	genotyped
rs7944004	2311152	G	asthma	-9.1123e-05	0.88641	0.495364	0.1036	0.972788
rs8024033	40403657	G	asthma	-0.0023303	0.00023165	0.497166	0.6465	0.986833
rs872071	411064	G	asthma	0.0027	1.8954e-05	0.4714	0.002756	genotyped
rs898518	109016824	A	asthma	-0.00058511	0.36	0.420442	0.6663	0.9953
rs9273012	32611641	G	asthma	0.0076196	5.4425e-24	0.247394	7.827e-08	0.931867
rs9273363	32626272	C	asthma	-0.0087792	3.9778e-37	0.3017	0.008396	genotyped
rs9308731	111908262	A	asthma	-0.0011027	0.083105	0.451626	0.8251	0.992825
rs9815073	188115682	A	asthma	0.0051441	9.9824e-14	0.343033	0.6382	0.920506
rs9880772	27777779	A	asthma	0.00069839	0.27116	0.45231	0.2082	0.993472
rs10069690	1279790	C	B00-B09 Viral infections characterized by skin and mucous membrane lesions	0.00013153	0.37852	0.2574	0.4474	genotyped
rs10936599	169492101	C	B00-B09 Viral infections characterized by skin and mucous membrane lesions	-1.3556e-05	0.92895	0.244	0.1286	genotyped
rs13397985	231091223	T	B00-B09 Viral infections characterized by skin and mucous membrane lesions	0.00010471	0.53139	0.189	0.3714	genotyped
rs13401811	111616104	A	B00-B09 Viral infections characterized by skin and mucous membrane lesions	-0.0001375	0.41423	0.184757	0.4785	0.997125
rs1679013	22206987	T	B00-B09 Viral infections characterized by skin and mucous membrane lesions	-0.0001692	0.21811	0.460621	0.6164	0.901667
rs17246404	124462661	T	B00-B09 Viral infections characterized by skin and mucous membrane lesions	-4.5897e-05	0.75193	0.281925	0.07283	0.99983
rs17483466	111797458	A	B00-B09 Viral infections characterized by skin and mucous membrane lesions	-0.00030824	0.057854	0.203	0.1932	genotyped
rs210134	33540209	G	B00-B09 Viral infections characterized by skin and mucous membrane lesions	-5.8782e-05	0.67649	0.3119	0.8643	genotyped
rs2236256	154478440	A	B00-B09 Viral infections characterized by skin and mucous membrane lesions	-0.00012915	0.32602	0.455858	0.1429	0.988131
rs2466024	128188019	A	B00-B09 Viral infections characterized by skin and mucous membrane lesions	5.2716e-05	0.69113	0.411781	0.5124	0.995702
rs2511714	103578874	G	B00-B09 Viral infections characterized by skin and mucous membrane lesions	3.9675e-05	0.76714	0.402526	0.8305	0.982624
rs305061	85975659	T	B00-B09 Viral infections characterized by skin and mucous membrane lesions	-0.00010843	0.43163	0.3395	0.5962	genotyped
rs3769825	202111380	G	B00-B09 Viral infections characterized by skin and mucous membrane lesions	0.0002614	0.04781	0.4289	0.08893	genotyped
rs391525	85944439	A	B00-B09 Viral infections characterized by skin and mucous membrane lesions	1.677e-05	0.90345	0.3379	0.1393	genotyped
rs4406737	90759724	G	B00-B09 Viral infections characterized by skin and mucous membrane lesions	-9.8164e-05	0.45683	0.4366	0.9501	0.9932
rs4987852	60793921	T	B00-B09 Viral infections characterized by skin and mucous membrane lesions	0.00017804	0.48831	0.06935	0.188	genotyped
rs7169431	56340896	G	B00-B09 Viral infections characterized by skin and mucous membrane lesions	0.00037526	0.11351	0.0824585	0.4617	1
rs7176508	70018990	G	B00-B09 Viral infections characterized by skin and mucous membrane lesions	0.00033829	0.011664	0.385	0.8144	genotyped
rs7231647	57628926	A	B00-B09 Viral infections characterized by skin and mucous membrane lesions	-8.9083e-05	0.50425	0.416174	5.948e-08	0.974209
rs735665	123361397	G	B00-B09 Viral infections characterized by skin and mucous membrane lesions	-9.7567e-05	0.55523	0.1935	0.5965	genotyped
rs73718779	2969278	C	B00-B09 Viral infections characterized by skin and mucous membrane lesions	0.00033286	0.12086	0.1042	0.0001314	genotyped
rs757978	242371101	C	B00-B09 Viral infections characterized by skin and mucous membrane lesions	0.00017343	0.40961	0.1079	0.8308	genotyped
rs7944004	2311152	G	B00-B09 Viral infections characterized by skin and mucous membrane lesions	-9.8371e-05	0.45621	0.495364	0.1036	0.972788
rs8024033	40403657	G	B00-B09 Viral infections characterized by skin and mucous membrane lesions	-0.00015552	0.23576	0.497166	0.6465	0.986833
rs872071	411064	G	B00-B09 Viral infections characterized by skin and mucous membrane lesions	-6.3487e-06	0.96115	0.4714	0.002756	genotyped
rs898518	109016824	A	B00-B09 Viral infections characterized by skin and mucous membrane lesions	5.7157e-05	0.66606	0.420442	0.6663	0.9953
rs9273012	32611641	G	B00-B09 Viral infections characterized by skin and mucous membrane lesions	0.00038045	0.014571	0.247394	7.827e-08	0.931867
rs9273363	32626272	C	B00-B09 Viral infections characterized by skin and mucous membrane lesions	-0.00039517	0.0055126	0.3017	0.008396	genotyped
rs9308731	111908262	A	B00-B09 Viral infections characterized by skin and mucous membrane lesions	-5.6538e-05	0.66708	0.451626	0.8251	0.992825
rs9815073	188115682	A	B00-B09 Viral infections characterized by skin and mucous membrane lesions	0.00015654	0.27342	0.343033	0.6382	0.920506
rs9880772	27777779	A	B00-B09 Viral infections characterized by skin and mucous membrane lesions	0.00023807	0.069623	0.45231	0.2082	0.993472
rs10069690	1279790	C	B07 Viral warts	3.599e-05	0.7173	0.2574	0.4474	genotyped
rs10936599	169492101	C	B07 Viral warts	5.0449e-06	0.96023	0.244	0.1286	genotyped
rs13397985	231091223	T	B07 Viral warts	0.00017351	0.11902	0.189	0.3714	genotyped
rs13401811	111616104	A	B07 Viral warts	6.3974e-05	0.56799	0.184757	0.4785	0.997125
rs1679013	22206987	T	B07 Viral warts	-2.8468e-05	0.75548	0.460621	0.6164	0.901667
rs17246404	124462661	T	B07 Viral warts	2.1217e-05	0.82618	0.281925	0.07283	0.99983
rs17483466	111797458	A	B07 Viral warts	-8.8618e-05	0.4124	0.203	0.1932	genotyped
rs210134	33540209	G	B07 Viral warts	3.4109e-05	0.71596	0.3119	0.8643	genotyped
rs2236256	154478440	A	B07 Viral warts	-4.7211e-05	0.5895	0.455858	0.1429	0.988131
rs2466024	128188019	A	B07 Viral warts	8.6635e-05	0.32649	0.411781	0.5124	0.995702
rs2511714	103578874	G	B07 Viral warts	6.7216e-05	0.45093	0.402526	0.8305	0.982624
rs305061	85975659	T	B07 Viral warts	-6.5713e-05	0.47385	0.3395	0.5962	genotyped
rs3769825	202111380	G	B07 Viral warts	0.00023948	0.0064253	0.4289	0.08893	genotyped
rs391525	85944439	A	B07 Viral warts	0.00010143	0.27019	0.3379	0.1393	genotyped
rs4406737	90759724	G	B07 Viral warts	4.5889e-05	0.60116	0.4366	0.9501	0.9932
rs4987852	60793921	T	B07 Viral warts	-1.5889e-05	0.92595	0.06935	0.188	genotyped
rs7169431	56340896	G	B07 Viral warts	0.00020944	0.18431	0.0824585	0.4617	1
rs7176508	70018990	G	B07 Viral warts	2.3196e-05	0.79492	0.385	0.8144	genotyped
rs7231647	57628926	A	B07 Viral warts	3.778e-05	0.67038	0.416174	5.948e-08	0.974209
rs735665	123361397	G	B07 Viral warts	1.9541e-05	0.85908	0.1935	0.5965	genotyped
rs73718779	2969278	C	B07 Viral warts	4.8843e-05	0.7323	0.1042	0.0001314	genotyped
rs757978	242371101	C	B07 Viral warts	7.0222e-05	0.61577	0.1079	0.8308	genotyped
rs7944004	2311152	G	B07 Viral warts	-5.2701e-05	0.5486	0.495364	0.1036	0.972788
rs8024033	40403657	G	B07 Viral warts	-4.9735e-05	0.56875	0.497166	0.6465	0.986833
rs872071	411064	G	B07 Viral warts	4.4814e-05	0.60535	0.4714	0.002756	genotyped
rs898518	109016824	A	B07 Viral warts	3.2557e-05	0.71183	0.420442	0.6663	0.9953
rs9273012	32611641	G	B07 Viral warts	0.00030418	0.0033328	0.247394	7.827e-08	0.931867
rs9273363	32626272	C	B07 Viral warts	-0.00021296	0.024589	0.3017	0.008396	genotyped
rs9308731	111908262	A	B07 Viral warts	-0.00014316	0.10157	0.451626	0.8251	0.992825
rs9815073	188115682	A	B07 Viral warts	0.00015536	0.10237	0.343033	0.6382	0.920506
rs9880772	27777779	A	B07 Viral warts	5.3612e-05	0.53921	0.45231	0.2082	0.993472
rs10069690	1279790	C	B15-B19 Viral hepatitis	-4.9788e-05	0.57728	0.2574	0.4474	genotyped
rs10936599	169492101	C	B15-B19 Viral hepatitis	1.7581e-05	0.84672	0.244	0.1286	genotyped
rs13397985	231091223	T	B15-B19 Viral hepatitis	-7.4704e-05	0.45535	0.189	0.3714	genotyped
rs13401811	111616104	A	B15-B19 Viral hepatitis	0.000178	0.077205	0.184757	0.4785	0.997125
rs1679013	22206987	T	B15-B19 Viral hepatitis	-7.7975e-05	0.3427	0.460621	0.6164	0.901667
rs17246404	124462661	T	B15-B19 Viral hepatitis	0.00011685	0.17851	0.281925	0.07283	0.99983
rs17483466	111797458	A	B15-B19 Viral hepatitis	-2.4707e-05	0.79935	0.203	0.1932	genotyped
rs210134	33540209	G	B15-B19 Viral hepatitis	-8.8147e-05	0.29575	0.3119	0.8643	genotyped
rs2236256	154478440	A	B15-B19 Viral hepatitis	0.00013172	0.094151	0.455858	0.1429	0.988131
rs2466024	128188019	A	B15-B19 Viral hepatitis	-3.7087e-05	0.64038	0.411781	0.5124	0.995702
rs2511714	103578874	G	B15-B19 Viral hepatitis	-3.0778e-05	0.70105	0.402526	0.8305	0.982624
rs305061	85975659	T	B15-B19 Viral hepatitis	-6.8912e-06	0.93341	0.3395	0.5962	genotyped
rs3769825	202111380	G	B15-B19 Viral hepatitis	-4.7958e-05	0.54383	0.4289	0.08893	genotyped
rs391525	85944439	A	B15-B19 Viral hepatitis	0.00013967	0.091219	0.3379	0.1393	genotyped
rs4406737	90759724	G	B15-B19 Viral hepatitis	2.0471e-05	0.7954	0.4366	0.9501	0.9932
rs4987852	60793921	T	B15-B19 Viral hepatitis	8.7839e-05	0.56761	0.06935	0.188	genotyped
rs7169431	56340896	G	B15-B19 Viral hepatitis	9.9132e-06	0.94429	0.0824585	0.4617	1
rs7176508	70018990	G	B15-B19 Viral hepatitis	7.6177e-05	0.34243	0.385	0.8144	genotyped
rs7231647	57628926	A	B15-B19 Viral hepatitis	0.00011529	0.14848	0.416174	5.948e-08	0.974209
rs735665	123361397	G	B15-B19 Viral hepatitis	-0.00016196	0.10157	0.1935	0.5965	genotyped
rs73718779	2969278	C	B15-B19 Viral hepatitis	6.6009e-05	0.60722	0.1042	0.0001314	genotyped
rs757978	242371101	C	B15-B19 Viral hepatitis	-4.0262e-05	0.74894	0.1079	0.8308	genotyped
rs7944004	2311152	G	B15-B19 Viral hepatitis	-2.8598e-05	0.71723	0.495364	0.1036	0.972788
rs8024033	40403657	G	B15-B19 Viral hepatitis	-0.00010741	0.17108	0.497166	0.6465	0.986833
rs872071	411064	G	B15-B19 Viral hepatitis	0.00014594	0.061321	0.4714	0.002756	genotyped
rs898518	109016824	A	B15-B19 Viral hepatitis	-3.9761e-05	0.61579	0.420442	0.6663	0.9953
rs9273012	32611641	G	B15-B19 Viral hepatitis	3.7835e-05	0.68476	0.247394	7.827e-08	0.931867
rs9273363	32626272	C	B15-B19 Viral hepatitis	-0.00011997	0.1591	0.3017	0.008396	genotyped
rs9308731	111908262	A	B15-B19 Viral hepatitis	5.7737e-05	0.46269	0.451626	0.8251	0.992825
rs9815073	188115682	A	B15-B19 Viral hepatitis	-1.0635e-05	0.90102	0.343033	0.6382	0.920506
rs9880772	27777779	A	B15-B19 Viral hepatitis	-5.6023e-05	0.47543	0.45231	0.2082	0.993472
rs10069690	1279790	C	B25-B34 Other viral diseases	5.7772e-06	0.9718	0.2574	0.4474	genotyped
rs10936599	169492101	C	B25-B34 Other viral diseases	6.5503e-07	0.99686	0.244	0.1286	genotyped
rs13397985	231091223	T	B25-B34 Other viral diseases	-0.0001567	0.39204	0.189	0.3714	genotyped
rs13401811	111616104	A	B25-B34 Other viral diseases	-4.7881e-05	0.795	0.184757	0.4785	0.997125
rs1679013	22206987	T	B25-B34 Other viral diseases	5.2211e-05	0.72843	0.460621	0.6164	0.901667
rs17246404	124462661	T	B25-B34 Other viral diseases	-6.4446e-05	0.68496	0.281925	0.07283	0.99983
rs17483466	111797458	A	B25-B34 Other viral diseases	-2.7313e-05	0.87793	0.203	0.1932	genotyped
rs210134	33540209	G	B25-B34 Other viral diseases	0.00022313	0.14779	0.3119	0.8643	genotyped
rs2236256	154478440	A	B25-B34 Other viral diseases	-9.4835e-06	0.94745	0.455858	0.1429	0.988131
rs2466024	128188019	A	B25-B34 Other viral diseases	0.00018589	0.20062	0.411781	0.5124	0.995702
rs2511714	103578874	G	B25-B34 Other viral diseases	-0.00024699	0.0922	0.402526	0.8305	0.982624
rs305061	85975659	T	B25-B34 Other viral diseases	-0.00017343	0.25031	0.3395	0.5962	genotyped
rs3769825	202111380	G	B25-B34 Other viral diseases	-2.2515e-05	0.87621	0.4289	0.08893	genotyped
rs391525	85944439	A	B25-B34 Other viral diseases	0.00012682	0.40181	0.3379	0.1393	genotyped
rs4406737	90759724	G	B25-B34 Other viral diseases	0.0001396	0.33355	0.4366	0.9501	0.9932
rs4987852	60793921	T	B25-B34 Other viral diseases	-0.00063486	0.023964	0.06935	0.188	genotyped
rs7169431	56340896	G	B25-B34 Other viral diseases	-0.00027072	0.29676	0.0824585	0.4617	1
rs7176508	70018990	G	B25-B34 Other viral diseases	-0.00012692	0.38716	0.385	0.8144	genotyped
rs7231647	57628926	A	B25-B34 Other viral diseases	0.0001024	0.48305	0.416174	5.948e-08	0.974209
rs735665	123361397	G	B25-B34 Other viral diseases	-7.6952e-05	0.67069	0.1935	0.5965	genotyped
rs73718779	2969278	C	B25-B34 Other viral diseases	0.00029005	0.21676	0.1042	0.0001314	genotyped
rs757978	242371101	C	B25-B34 Other viral diseases	-0.00024841	0.28045	0.1079	0.8308	genotyped
rs7944004	2311152	G	B25-B34 Other viral diseases	-0.00032569	0.024171	0.495364	0.1036	0.972788
rs8024033	40403657	G	B25-B34 Other viral diseases	-0.00022128	0.12314	0.497166	0.6465	0.986833
rs872071	411064	G	B25-B34 Other viral diseases	-0.00024661	0.083807	0.4714	0.002756	genotyped
rs898518	109016824	A	B25-B34 Other viral diseases	-1.9184e-05	0.89472	0.420442	0.6663	0.9953
rs9273012	32611641	G	B25-B34 Other viral diseases	7.9273e-05	0.64183	0.247394	7.827e-08	0.931867
rs9273363	32626272	C	B25-B34 Other viral diseases	-5.7181e-05	0.71362	0.3017	0.008396	genotyped
rs9308731	111908262	A	B25-B34 Other viral diseases	0.00014616	0.30951	0.451626	0.8251	0.992825
rs9815073	188115682	A	B25-B34 Other viral diseases	-9.2891e-06	0.95266	0.343033	0.6382	0.920506
rs9880772	27777779	A	B25-B34 Other viral diseases	0.00013305	0.35435	0.45231	0.2082	0.993472
rs10069690	1279790	C	B34 Viral infection of unspecified site	-2.8577e-05	0.85368	0.2574	0.4474	genotyped
rs10936599	169492101	C	B34 Viral infection of unspecified site	0.00010712	0.49736	0.244	0.1286	genotyped
rs13397985	231091223	T	B34 Viral infection of unspecified site	-0.00018839	0.27786	0.189	0.3714	genotyped
rs13401811	111616104	A	B34 Viral infection of unspecified site	-3.691e-05	0.83272	0.184757	0.4785	0.997125
rs1679013	22206987	T	B34 Viral infection of unspecified site	1.1394e-05	0.9363	0.460621	0.6164	0.901667
rs17246404	124462661	T	B34 Viral infection of unspecified site	-0.00011042	0.4635	0.281925	0.07283	0.99983
rs17483466	111797458	A	B34 Viral infection of unspecified site	-2.0425e-05	0.90359	0.203	0.1932	genotyped
rs210134	33540209	G	B34 Viral infection of unspecified site	0.00024679	0.09144	0.3119	0.8643	genotyped
rs2236256	154478440	A	B34 Viral infection of unspecified site	2.3423e-06	0.98631	0.455858	0.1429	0.988131
rs2466024	128188019	A	B34 Viral infection of unspecified site	0.00018099	0.18879	0.411781	0.5124	0.995702
rs2511714	103578874	G	B34 Viral infection of unspecified site	-0.00020456	0.14133	0.402526	0.8305	0.982624
rs305061	85975659	T	B34 Viral infection of unspecified site	-0.00010862	0.44762	0.3395	0.5962	genotyped
rs3769825	202111380	G	B34 Viral infection of unspecified site	8.3528e-05	0.54225	0.4289	0.08893	genotyped
rs391525	85944439	A	B34 Viral infection of unspecified site	5.4784e-05	0.70245	0.3379	0.1393	genotyped
rs4406737	90759724	G	B34 Viral infection of unspecified site	8.7255e-05	0.52383	0.4366	0.9501	0.9932
rs4987852	60793921	T	B34 Viral infection of unspecified site	-0.00052482	0.049034	0.06935	0.188	genotyped
rs7169431	56340896	G	B34 Viral infection of unspecified site	-0.00022972	0.35047	0.0824585	0.4617	1
rs7176508	70018990	G	B34 Viral infection of unspecified site	-6.1729e-05	0.65738	0.385	0.8144	genotyped
rs7231647	57628926	A	B34 Viral infection of unspecified site	0.00013511	0.32908	0.416174	5.948e-08	0.974209
rs735665	123361397	G	B34 Viral infection of unspecified site	2.521e-05	0.8832	0.1935	0.5965	genotyped
rs73718779	2969278	C	B34 Viral infection of unspecified site	0.00025747	0.24766	0.1042	0.0001314	genotyped
rs757978	242371101	C	B34 Viral infection of unspecified site	-0.00018059	0.40798	0.1079	0.8308	genotyped
rs7944004	2311152	G	B34 Viral infection of unspecified site	-0.0003171	0.020622	0.495364	0.1036	0.972788
rs8024033	40403657	G	B34 Viral infection of unspecified site	-0.00023653	0.082242	0.497166	0.6465	0.986833
rs872071	411064	G	B34 Viral infection of unspecified site	-0.00020189	0.13559	0.4714	0.002756	genotyped
rs898518	109016824	A	B34 Viral infection of unspecified site	-4.4997e-05	0.7434	0.420442	0.6663	0.9953
rs9273012	32611641	G	B34 Viral infection of unspecified site	7.3405e-05	0.64973	0.247394	7.827e-08	0.931867
rs9273363	32626272	C	B34 Viral infection of unspecified site	-9.2107e-05	0.53309	0.3017	0.008396	genotyped
rs9308731	111908262	A	B34 Viral infection of unspecified site	0.00013132	0.33562	0.451626	0.8251	0.992825
rs9815073	188115682	A	B34 Viral infection of unspecified site	-3.4204e-05	0.8177	0.343033	0.6382	0.920506
rs9880772	27777779	A	B34 Viral infection of unspecified site	0.00013415	0.32476	0.45231	0.2082	0.993472
rs10069690	1279790	C	B35-B49 Mycoses	0.00047428	0.013424	0.2574	0.4474	genotyped
rs10936599	169492101	C	B35-B49 Mycoses	8.7641e-05	0.65375	0.244	0.1286	genotyped
rs13397985	231091223	T	B35-B49 Mycoses	-0.00012111	0.57321	0.189	0.3714	genotyped
rs13401811	111616104	A	B35-B49 Mycoses	0.00013182	0.54244	0.184757	0.4785	0.997125
rs1679013	22206987	T	B35-B49 Mycoses	-9.4081e-05	0.59408	0.460621	0.6164	0.901667
rs17246404	124462661	T	B35-B49 Mycoses	0.00024563	0.18803	0.281925	0.07283	0.99983
rs17483466	111797458	A	B35-B49 Mycoses	-0.00015532	0.45702	0.203	0.1932	genotyped
rs210134	33540209	G	B35-B49 Mycoses	0.00020687	0.25348	0.3119	0.8643	genotyped
rs2236256	154478440	A	B35-B49 Mycoses	1.9336e-06	0.99088	0.455858	0.1429	0.988131
rs2466024	128188019	A	B35-B49 Mycoses	-7.102e-05	0.67698	0.411781	0.5124	0.995702
rs2511714	103578874	G	B35-B49 Mycoses	-7.3954e-05	0.66751	0.402526	0.8305	0.982624
rs305061	85975659	T	B35-B49 Mycoses	-0.00024741	0.16253	0.3395	0.5962	genotyped
rs3769825	202111380	G	B35-B49 Mycoses	5.0602e-05	0.76561	0.4289	0.08893	genotyped
rs391525	85944439	A	B35-B49 Mycoses	0.00024029	0.17609	0.3379	0.1393	genotyped
rs4406737	90759724	G	B35-B49 Mycoses	0.00010455	0.53737	0.4366	0.9501	0.9932
rs4987852	60793921	T	B35-B49 Mycoses	-0.00040363	0.22145	0.06935	0.188	genotyped
rs7169431	56340896	G	B35-B49 Mycoses	0.0002886	0.34351	0.0824585	0.4617	1
rs7176508	70018990	G	B35-B49 Mycoses	0.0002463	0.15297	0.385	0.8144	genotyped
rs7231647	57628926	A	B35-B49 Mycoses	4.4052e-06	0.9795	0.416174	5.948e-08	0.974209
rs735665	123361397	G	B35-B49 Mycoses	0.00042117	0.047413	0.1935	0.5965	genotyped
rs73718779	2969278	C	B35-B49 Mycoses	-0.00019115	0.48848	0.1042	0.0001314	genotyped
rs757978	242371101	C	B35-B49 Mycoses	0.00025302	0.34921	0.1079	0.8308	genotyped
rs7944004	2311152	G	B35-B49 Mycoses	0.00042144	0.012949	0.495364	0.1036	0.972788
rs8024033	40403657	G	B35-B49 Mycoses	-1.7179e-05	0.91881	0.497166	0.6465	0.986833
rs872071	411064	G	B35-B49 Mycoses	-0.0001427	0.39454	0.4714	0.002756	genotyped
rs898518	109016824	A	B35-B49 Mycoses	-7.5188e-05	0.65864	0.420442	0.6663	0.9953
rs9273012	32611641	G	B35-B49 Mycoses	0.00043394	0.030246	0.247394	7.827e-08	0.931867
rs9273363	32626272	C	B35-B49 Mycoses	-0.00016846	0.35753	0.3017	0.008396	genotyped
rs9308731	111908262	A	B35-B49 Mycoses	-0.00020092	0.23422	0.451626	0.8251	0.992825
rs9815073	188115682	A	B35-B49 Mycoses	0.00015282	0.40542	0.343033	0.6382	0.920506
rs9880772	27777779	A	B35-B49 Mycoses	7.3201e-05	0.66423	0.45231	0.2082	0.993472
rs10069690	1279790	C	B37 Candidiasis	0.00031273	0.069929	0.2574	0.4474	genotyped
rs10936599	169492101	C	B37 Candidiasis	0.00010898	0.53515	0.244	0.1286	genotyped
rs13397985	231091223	T	B37 Candidiasis	-0.00017679	0.36052	0.189	0.3714	genotyped
rs13401811	111616104	A	B37 Candidiasis	0.00013538	0.48668	0.184757	0.4785	0.997125
rs1679013	22206987	T	B37 Candidiasis	-0.00012085	0.44655	0.460621	0.6164	0.901667
rs17246404	124462661	T	B37 Candidiasis	0.00028289	0.091933	0.281925	0.07283	0.99983
rs17483466	111797458	A	B37 Candidiasis	-0.00012673	0.49982	0.203	0.1932	genotyped
rs210134	33540209	G	B37 Candidiasis	9.1073e-05	0.57619	0.3119	0.8643	genotyped
rs2236256	154478440	A	B37 Candidiasis	-5.0566e-05	0.73952	0.455858	0.1429	0.988131
rs2466024	128188019	A	B37 Candidiasis	2.7851e-05	0.85586	0.411781	0.5124	0.995702
rs2511714	103578874	G	B37 Candidiasis	-9.9128e-05	0.52204	0.402526	0.8305	0.982624
rs305061	85975659	T	B37 Candidiasis	-0.0001385	0.38469	0.3395	0.5962	genotyped
rs3769825	202111380	G	B37 Candidiasis	2.116e-05	0.88975	0.4289	0.08893	genotyped
rs391525	85944439	A	B37 Candidiasis	0.00015196	0.34147	0.3379	0.1393	genotyped
rs4406737	90759724	G	B37 Candidiasis	-3.2277e-05	0.83235	0.4366	0.9501	0.9932
rs4987852	60793921	T	B37 Candidiasis	-0.0002324	0.43373	0.06935	0.188	genotyped
rs7169431	56340896	G	B37 Candidiasis	0.00024138	0.37838	0.0824585	0.4617	1
rs7176508	70018990	G	B37 Candidiasis	0.00021974	0.15629	0.385	0.8144	genotyped
rs7231647	57628926	A	B37 Candidiasis	-6.4762e-05	0.67436	0.416174	5.948e-08	0.974209
rs735665	123361397	G	B37 Candidiasis	0.00031426	0.10003	0.1935	0.5965	genotyped
rs73718779	2969278	C	B37 Candidiasis	-0.00041481	0.094639	0.1042	0.0001314	genotyped
rs757978	242371101	C	B37 Candidiasis	6.1363e-06	0.97986	0.1079	0.8308	genotyped
rs7944004	2311152	G	B37 Candidiasis	0.00033975	0.025918	0.495364	0.1036	0.972788
rs8024033	40403657	G	B37 Candidiasis	-0.00013402	0.37664	0.497166	0.6465	0.986833
rs872071	411064	G	B37 Candidiasis	-0.00011381	0.45026	0.4714	0.002756	genotyped
rs898518	109016824	A	B37 Candidiasis	-5.5818e-05	0.71537	0.420442	0.6663	0.9953
rs9273012	32611641	G	B37 Candidiasis	0.00036487	0.042794	0.247394	7.827e-08	0.931867
rs9273363	32626272	C	B37 Candidiasis	-0.00026179	0.11188	0.3017	0.008396	genotyped
rs9308731	111908262	A	B37 Candidiasis	-0.00015226	0.31614	0.451626	0.8251	0.992825
rs9815073	188115682	A	B37 Candidiasis	5.7754e-05	0.72667	0.343033	0.6382	0.920506
rs9880772	27777779	A	B37 Candidiasis	3.2499e-05	0.83034	0.45231	0.2082	0.993472
rs10069690	1279790	C	B95 Streptococcus and staphylococcus as the cause of diseases classified to other chapters	-2.5184e-05	0.91522	0.2574	0.4474	genotyped
rs10936599	169492101	C	B95 Streptococcus and staphylococcus as the cause of diseases classified to other chapters	-0.00020891	0.38565	0.244	0.1286	genotyped
rs13397985	231091223	T	B95 Streptococcus and staphylococcus as the cause of diseases classified to other chapters	0.00012651	0.63315	0.189	0.3714	genotyped
rs13401811	111616104	A	B95 Streptococcus and staphylococcus as the cause of diseases classified to other chapters	-0.00032247	0.22677	0.184757	0.4785	0.997125
rs1679013	22206987	T	B95 Streptococcus and staphylococcus as the cause of diseases classified to other chapters	-0.00058984	0.0067317	0.460621	0.6164	0.901667
rs17246404	124462661	T	B95 Streptococcus and staphylococcus as the cause of diseases classified to other chapters	0.00018761	0.41465	0.281925	0.07283	0.99983
rs17483466	111797458	A	B95 Streptococcus and staphylococcus as the cause of diseases classified to other chapters	0.0002765	0.28283	0.203	0.1932	genotyped
rs210134	33540209	G	B95 Streptococcus and staphylococcus as the cause of diseases classified to other chapters	-2.9641e-05	0.89433	0.3119	0.8643	genotyped
rs2236256	154478440	A	B95 Streptococcus and staphylococcus as the cause of diseases classified to other chapters	4.1746e-05	0.84116	0.455858	0.1429	0.988131
rs2466024	128188019	A	B95 Streptococcus and staphylococcus as the cause of diseases classified to other chapters	5.2951e-05	0.80107	0.411781	0.5124	0.995702
rs2511714	103578874	G	B95 Streptococcus and staphylococcus as the cause of diseases classified to other chapters	0.00014704	0.48838	0.402526	0.8305	0.982624
rs305061	85975659	T	B95 Streptococcus and staphylococcus as the cause of diseases classified to other chapters	1.6246e-05	0.94071	0.3395	0.5962	genotyped
rs3769825	202111380	G	B95 Streptococcus and staphylococcus as the cause of diseases classified to other chapters	-0.00038546	0.065471	0.4289	0.08893	genotyped
rs391525	85944439	A	B95 Streptococcus and staphylococcus as the cause of diseases classified to other chapters	0.00011625	0.59555	0.3379	0.1393	genotyped
rs4406737	90759724	G	B95 Streptococcus and staphylococcus as the cause of diseases classified to other chapters	-7.732e-05	0.71143	0.4366	0.9501	0.9932
rs4987852	60793921	T	B95 Streptococcus and staphylococcus as the cause of diseases classified to other chapters	-5.9657e-05	0.88341	0.06935	0.188	genotyped
rs7169431	56340896	G	B95 Streptococcus and staphylococcus as the cause of diseases classified to other chapters	0.00019169	0.60984	0.0824585	0.4617	1
rs7176508	70018990	G	B95 Streptococcus and staphylococcus as the cause of diseases classified to other chapters	0.00010292	0.62814	0.385	0.8144	genotyped
rs7231647	57628926	A	B95 Streptococcus and staphylococcus as the cause of diseases classified to other chapters	9.1832e-05	0.66371	0.416174	5.948e-08	0.974209
rs735665	123361397	G	B95 Streptococcus and staphylococcus as the cause of diseases classified to other chapters	0.00023493	0.36978	0.1935	0.5965	genotyped
rs73718779	2969278	C	B95 Streptococcus and staphylococcus as the cause of diseases classified to other chapters	0.0002598	0.44469	0.1042	0.0001314	genotyped
rs757978	242371101	C	B95 Streptococcus and staphylococcus as the cause of diseases classified to other chapters	1.4922e-05	0.96428	0.1079	0.8308	genotyped
rs7944004	2311152	G	B95 Streptococcus and staphylococcus as the cause of diseases classified to other chapters	4.0863e-05	0.84506	0.495364	0.1036	0.972788
rs8024033	40403657	G	B95 Streptococcus and staphylococcus as the cause of diseases classified to other chapters	8.1761e-05	0.69398	0.497166	0.6465	0.986833
rs872071	411064	G	B95 Streptococcus and staphylococcus as the cause of diseases classified to other chapters	-0.0001335	0.51789	0.4714	0.002756	genotyped
rs898518	109016824	A	B95 Streptococcus and staphylococcus as the cause of diseases classified to other chapters	-0.0001928	0.35821	0.420442	0.6663	0.9953
rs9273012	32611641	G	B95 Streptococcus and staphylococcus as the cause of diseases classified to other chapters	-9.134e-05	0.71119	0.247394	7.827e-08	0.931867
rs9273363	32626272	C	B95 Streptococcus and staphylococcus as the cause of diseases classified to other chapters	-0.0002112	0.34905	0.3017	0.008396	genotyped
rs9308731	111908262	A	B95 Streptococcus and staphylococcus as the cause of diseases classified to other chapters	7.1882e-05	0.72993	0.451626	0.8251	0.992825
rs9815073	188115682	A	B95 Streptococcus and staphylococcus as the cause of diseases classified to other chapters	9.0252e-06	0.9682	0.343033	0.6382	0.920506
rs9880772	27777779	A	B95 Streptococcus and staphylococcus as the cause of diseases classified to other chapters	-0.00028968	0.1634	0.45231	0.2082	0.993472
rs10069690	1279790	C	B95-B98 Bacterial, viral and other infectious agents	3.8758e-06	0.99259	0.2574	0.4474	genotyped
rs10936599	169492101	C	B95-B98 Bacterial, viral and other infectious agents	0.00019405	0.64819	0.244	0.1286	genotyped
rs13397985	231091223	T	B95-B98 Bacterial, viral and other infectious agents	2.0105e-05	0.96573	0.189	0.3714	genotyped
rs13401811	111616104	A	B95-B98 Bacterial, viral and other infectious agents	-0.00051004	0.27884	0.184757	0.4785	0.997125
rs1679013	22206987	T	B95-B98 Bacterial, viral and other infectious agents	-0.00062351	0.10465	0.460621	0.6164	0.901667
rs17246404	124462661	T	B95-B98 Bacterial, viral and other infectious agents	0.00012612	0.75607	0.281925	0.07283	0.99983
rs17483466	111797458	A	B95-B98 Bacterial, viral and other infectious agents	0.0006645	0.14372	0.203	0.1932	genotyped
rs210134	33540209	G	B95-B98 Bacterial, viral and other infectious agents	2.0345e-05	0.95881	0.3119	0.8643	genotyped
rs2236256	154478440	A	B95-B98 Bacterial, viral and other infectious agents	-0.00022492	0.54071	0.455858	0.1429	0.988131
rs2466024	128188019	A	B95-B98 Bacterial, viral and other infectious agents	-0.00030122	0.41686	0.411781	0.5124	0.995702
rs2511714	103578874	G	B95-B98 Bacterial, viral and other infectious agents	-0.00035587	0.34219	0.402526	0.8305	0.982624
rs305061	85975659	T	B95-B98 Bacterial, viral and other infectious agents	4.0992e-05	0.91532	0.3395	0.5962	genotyped
rs3769825	202111380	G	B95-B98 Bacterial, viral and other infectious agents	-0.00015609	0.67264	0.4289	0.08893	genotyped
rs391525	85944439	A	B95-B98 Bacterial, viral and other infectious agents	-0.00027525	0.47638	0.3379	0.1393	genotyped
rs4406737	90759724	G	B95-B98 Bacterial, viral and other infectious agents	-0.00062432	0.090718	0.4366	0.9501	0.9932
rs4987852	60793921	T	B95-B98 Bacterial, viral and other infectious agents	-0.00018584	0.79584	0.06935	0.188	genotyped
rs7169431	56340896	G	B95-B98 Bacterial, viral and other infectious agents	0.0010623	0.10918	0.0824585	0.4617	1
rs7176508	70018990	G	B95-B98 Bacterial, viral and other infectious agents	0.00069422	0.06422	0.385	0.8144	genotyped
rs7231647	57628926	A	B95-B98 Bacterial, viral and other infectious agents	-4.9779e-05	0.89381	0.416174	5.948e-08	0.974209
rs735665	123361397	G	B95-B98 Bacterial, viral and other infectious agents	0.00055226	0.23237	0.1935	0.5965	genotyped
rs73718779	2969278	C	B95-B98 Bacterial, viral and other infectious agents	0.00063761	0.28792	0.1042	0.0001314	genotyped
rs757978	242371101	C	B95-B98 Bacterial, viral and other infectious agents	-2.3073e-05	0.96871	0.1079	0.8308	genotyped
rs7944004	2311152	G	B95-B98 Bacterial, viral and other infectious agents	0.0001439	0.69667	0.495364	0.1036	0.972788
rs8024033	40403657	G	B95-B98 Bacterial, viral and other infectious agents	0.00052645	0.15127	0.497166	0.6465	0.986833
rs872071	411064	G	B95-B98 Bacterial, viral and other infectious agents	0.00055884	0.12515	0.4714	0.002756	genotyped
rs898518	109016824	A	B95-B98 Bacterial, viral and other infectious agents	-0.00056719	0.12566	0.420442	0.6663	0.9953
rs9273012	32611641	G	B95-B98 Bacterial, viral and other infectious agents	-0.00053321	0.22075	0.247394	7.827e-08	0.931867
rs9273363	32626272	C	B95-B98 Bacterial, viral and other infectious agents	-0.00013283	0.73864	0.3017	0.008396	genotyped
rs9308731	111908262	A	B95-B98 Bacterial, viral and other infectious agents	4.0912e-05	0.91138	0.451626	0.8251	0.992825
rs9815073	188115682	A	B95-B98 Bacterial, viral and other infectious agents	0.00037977	0.34221	0.343033	0.6382	0.920506
rs9880772	27777779	A	B95-B98 Bacterial, viral and other infectious agents	-6.4085e-06	0.98607	0.45231	0.2082	0.993472
rs10069690	1279790	C	B96 Other bacterial agents as the cause of diseases classified to other chapters	0.00016044	0.64128	0.2574	0.4474	genotyped
rs10936599	169492101	C	B96 Other bacterial agents as the cause of diseases classified to other chapters	0.00046238	0.18753	0.244	0.1286	genotyped
rs13397985	231091223	T	B96 Other bacterial agents as the cause of diseases classified to other chapters	-0.00014543	0.70631	0.189	0.3714	genotyped
rs13401811	111616104	A	B96 Other bacterial agents as the cause of diseases classified to other chapters	-0.00036278	0.35038	0.184757	0.4785	0.997125
rs1679013	22206987	T	B96 Other bacterial agents as the cause of diseases classified to other chapters	-0.00034528	0.276	0.460621	0.6164	0.901667
rs17246404	124462661	T	B96 Other bacterial agents as the cause of diseases classified to other chapters	7.1522e-05	0.83087	0.281925	0.07283	0.99983
rs17483466	111797458	A	B96 Other bacterial agents as the cause of diseases classified to other chapters	-3.8929e-06	0.99171	0.203	0.1932	genotyped
rs210134	33540209	G	B96 Other bacterial agents as the cause of diseases classified to other chapters	-0.00025045	0.44086	0.3119	0.8643	genotyped
rs2236256	154478440	A	B96 Other bacterial agents as the cause of diseases classified to other chapters	-0.00025762	0.39568	0.455858	0.1429	0.988131
rs2466024	128188019	A	B96 Other bacterial agents as the cause of diseases classified to other chapters	-0.00042663	0.16337	0.411781	0.5124	0.995702
rs2511714	103578874	G	B96 Other bacterial agents as the cause of diseases classified to other chapters	-0.00071917	0.01998	0.402526	0.8305	0.982624
rs305061	85975659	T	B96 Other bacterial agents as the cause of diseases classified to other chapters	0.00017532	0.58136	0.3395	0.5962	genotyped
rs3769825	202111380	G	B96 Other bacterial agents as the cause of diseases classified to other chapters	0.00020081	0.50986	0.4289	0.08893	genotyped
rs391525	85944439	A	B96 Other bacterial agents as the cause of diseases classified to other chapters	-6.0714e-05	0.84895	0.3379	0.1393	genotyped
rs4406737	90759724	G	B96 Other bacterial agents as the cause of diseases classified to other chapters	-0.00029065	0.33984	0.4366	0.9501	0.9932
rs4987852	60793921	T	B96 Other bacterial agents as the cause of diseases classified to other chapters	-0.00039234	0.50794	0.06935	0.188	genotyped
rs7169431	56340896	G	B96 Other bacterial agents as the cause of diseases classified to other chapters	0.00053697	0.3263	0.0824585	0.4617	1
rs7176508	70018990	G	B96 Other bacterial agents as the cause of diseases classified to other chapters	0.00051718	0.094657	0.385	0.8144	genotyped
rs7231647	57628926	A	B96 Other bacterial agents as the cause of diseases classified to other chapters	-0.00024862	0.41908	0.416174	5.948e-08	0.974209
rs735665	123361397	G	B96 Other bacterial agents as the cause of diseases classified to other chapters	0.00039379	0.30185	0.1935	0.5965	genotyped
rs73718779	2969278	C	B96 Other bacterial agents as the cause of diseases classified to other chapters	0.00045028	0.36297	0.1042	0.0001314	genotyped
rs757978	242371101	C	B96 Other bacterial agents as the cause of diseases classified to other chapters	1.7144e-05	0.97181	0.1079	0.8308	genotyped
rs7944004	2311152	G	B96 Other bacterial agents as the cause of diseases classified to other chapters	-1.9868e-05	0.94797	0.495364	0.1036	0.972788
rs8024033	40403657	G	B96 Other bacterial agents as the cause of diseases classified to other chapters	0.0005588	0.064815	0.497166	0.6465	0.986833
rs872071	411064	G	B96 Other bacterial agents as the cause of diseases classified to other chapters	0.00060048	0.045784	0.4714	0.002756	genotyped
rs898518	109016824	A	B96 Other bacterial agents as the cause of diseases classified to other chapters	-0.0003109	0.30886	0.420442	0.6663	0.9953
rs9273012	32611641	G	B96 Other bacterial agents as the cause of diseases classified to other chapters	-0.00064049	0.074586	0.247394	7.827e-08	0.931867
rs9273363	32626272	C	B96 Other bacterial agents as the cause of diseases classified to other chapters	-8.4272e-05	0.79748	0.3017	0.008396	genotyped
rs9308731	111908262	A	B96 Other bacterial agents as the cause of diseases classified to other chapters	-0.00014489	0.63273	0.451626	0.8251	0.992825
rs9815073	188115682	A	B96 Other bacterial agents as the cause of diseases classified to other chapters	0.00031099	0.34577	0.343033	0.6382	0.920506
rs9880772	27777779	A	B96 Other bacterial agents as the cause of diseases classified to other chapters	0.00041021	0.17552	0.45231	0.2082	0.993472
rs10069690	1279790	C	B97 Viral agents as the cause of diseases classified to other chapters	1.5417e-05	0.85869	0.2574	0.4474	genotyped
rs10936599	169492101	C	B97 Viral agents as the cause of diseases classified to other chapters	-3.3985e-05	0.69996	0.244	0.1286	genotyped
rs13397985	231091223	T	B97 Viral agents as the cause of diseases classified to other chapters	0.00013398	0.16742	0.189	0.3714	genotyped
rs13401811	111616104	A	B97 Viral agents as the cause of diseases classified to other chapters	-7.9148e-05	0.41783	0.184757	0.4785	0.997125
rs1679013	22206987	T	B97 Viral agents as the cause of diseases classified to other chapters	7.9785e-05	0.31665	0.460621	0.6164	0.901667
rs17246404	124462661	T	B97 Viral agents as the cause of diseases classified to other chapters	0.00013648	0.1051	0.281925	0.07283	0.99983
rs17483466	111797458	A	B97 Viral agents as the cause of diseases classified to other chapters	4.415e-05	0.63955	0.203	0.1932	genotyped
rs210134	33540209	G	B97 Viral agents as the cause of diseases classified to other chapters	6.4797e-05	0.42789	0.3119	0.8643	genotyped
rs2236256	154478440	A	B97 Viral agents as the cause of diseases classified to other chapters	-5.0429e-05	0.50859	0.455858	0.1429	0.988131
rs2466024	128188019	A	B97 Viral agents as the cause of diseases classified to other chapters	9.3775e-05	0.22305	0.411781	0.5124	0.995702
rs2511714	103578874	G	B97 Viral agents as the cause of diseases classified to other chapters	0.00012185	0.11692	0.402526	0.8305	0.982624
rs305061	85975659	T	B97 Viral agents as the cause of diseases classified to other chapters	-7.1803e-05	0.36925	0.3395	0.5962	genotyped
rs3769825	202111380	G	B97 Viral agents as the cause of diseases classified to other chapters	-9.7207e-05	0.20456	0.4289	0.08893	genotyped
rs391525	85944439	A	B97 Viral agents as the cause of diseases classified to other chapters	-7.2253e-05	0.36751	0.3379	0.1393	genotyped
rs4406737	90759724	G	B97 Viral agents as the cause of diseases classified to other chapters	-4.584e-05	0.54915	0.4366	0.9501	0.9932
rs4987852	60793921	T	B97 Viral agents as the cause of diseases classified to other chapters	0.00015	0.31419	0.06935	0.188	genotyped
rs7169431	56340896	G	B97 Viral agents as the cause of diseases classified to other chapters	1.3395e-05	0.9224	0.0824585	0.4617	1
rs7176508	70018990	G	B97 Viral agents as the cause of diseases classified to other chapters	8.5838e-05	0.26979	0.385	0.8144	genotyped
rs7231647	57628926	A	B97 Viral agents as the cause of diseases classified to other chapters	5.3344e-05	0.49058	0.416174	5.948e-08	0.974209
rs735665	123361397	G	B97 Viral agents as the cause of diseases classified to other chapters	-3.0517e-05	0.75027	0.1935	0.5965	genotyped
rs73718779	2969278	C	B97 Viral agents as the cause of diseases classified to other chapters	-0.00012652	0.30951	0.1042	0.0001314	genotyped
rs757978	242371101	C	B97 Viral agents as the cause of diseases classified to other chapters	0.00018708	0.1252	0.1079	0.8308	genotyped
rs7944004	2311152	G	B97 Viral agents as the cause of diseases classified to other chapters	2.0625e-05	0.78757	0.495364	0.1036	0.972788
rs8024033	40403657	G	B97 Viral agents as the cause of diseases classified to other chapters	5.4715e-05	0.47196	0.497166	0.6465	0.986833
rs872071	411064	G	B97 Viral agents as the cause of diseases classified to other chapters	0.00011694	0.12199	0.4714	0.002756	genotyped
rs898518	109016824	A	B97 Viral agents as the cause of diseases classified to other chapters	-6.9183e-05	0.36774	0.420442	0.6663	0.9953
rs9273012	32611641	G	B97 Viral agents as the cause of diseases classified to other chapters	0.00012434	0.16876	0.247394	7.827e-08	0.931867
rs9273363	32626272	C	B97 Viral agents as the cause of diseases classified to other chapters	2.3193e-05	0.77888	0.3017	0.008396	genotyped
rs9308731	111908262	A	B97 Viral agents as the cause of diseases classified to other chapters	0.00022611	0.0030207	0.451626	0.8251	0.992825
rs9815073	188115682	A	B97 Viral agents as the cause of diseases classified to other chapters	9.1135e-05	0.27168	0.343033	0.6382	0.920506
rs9880772	27777779	A	B97 Viral agents as the cause of diseases classified to other chapters	-0.0001409	0.064145	0.45231	0.2082	0.993472
rs10069690	1279790	C	B98 Other specified infectious agents as the cause of diseases classified to other chapters	1.6034e-06	0.98818	0.2574	0.4474	genotyped
rs10936599	169492101	C	B98 Other specified infectious agents as the cause of diseases classified to other chapters	2.1388e-05	0.84613	0.244	0.1286	genotyped
rs13397985	231091223	T	B98 Other specified infectious agents as the cause of diseases classified to other chapters	0.00011852	0.32833	0.189	0.3714	genotyped
rs13401811	111616104	A	B98 Other specified infectious agents as the cause of diseases classified to other chapters	3.3528e-05	0.78354	0.184757	0.4785	0.997125
rs1679013	22206987	T	B98 Other specified infectious agents as the cause of diseases classified to other chapters	7.8945e-05	0.42777	0.460621	0.6164	0.901667
rs17246404	124462661	T	B98 Other specified infectious agents as the cause of diseases classified to other chapters	-9.1202e-05	0.38614	0.281925	0.07283	0.99983
rs17483466	111797458	A	B98 Other specified infectious agents as the cause of diseases classified to other chapters	0.00028295	0.016288	0.203	0.1932	genotyped
rs210134	33540209	G	B98 Other specified infectious agents as the cause of diseases classified to other chapters	0.00012813	0.20946	0.3119	0.8643	genotyped
rs2236256	154478440	A	B98 Other specified infectious agents as the cause of diseases classified to other chapters	-3.5539e-05	0.7092	0.455858	0.1429	0.988131
rs2466024	128188019	A	B98 Other specified infectious agents as the cause of diseases classified to other chapters	-7.1093e-05	0.45972	0.411781	0.5124	0.995702
rs2511714	103578874	G	B98 Other specified infectious agents as the cause of diseases classified to other chapters	6.0042e-05	0.53637	0.402526	0.8305	0.982624
rs305061	85975659	T	B98 Other specified infectious agents as the cause of diseases classified to other chapters	-1.4979e-05	0.88081	0.3395	0.5962	genotyped
rs3769825	202111380	G	B98 Other specified infectious agents as the cause of diseases classified to other chapters	-5.2644e-05	0.58237	0.4289	0.08893	genotyped
rs391525	85944439	A	B98 Other specified infectious agents as the cause of diseases classified to other chapters	-9.8173e-05	0.32703	0.3379	0.1393	genotyped
rs4406737	90759724	G	B98 Other specified infectious agents as the cause of diseases classified to other chapters	-0.00024642	0.0099894	0.4366	0.9501	0.9932
rs4987852	60793921	T	B98 Other specified infectious agents as the cause of diseases classified to other chapters	0.00029956	0.10768	0.06935	0.188	genotyped
rs7169431	56340896	G	B98 Other specified infectious agents as the cause of diseases classified to other chapters	0.00028447	0.097856	0.0824585	0.4617	1
rs7176508	70018990	G	B98 Other specified infectious agents as the cause of diseases classified to other chapters	0.00016181	0.096001	0.385	0.8144	genotyped
rs7231647	57628926	A	B98 Other specified infectious agents as the cause of diseases classified to other chapters	2.6757e-05	0.78197	0.416174	5.948e-08	0.974209
rs735665	123361397	G	B98 Other specified infectious agents as the cause of diseases classified to other chapters	-4.7308e-06	0.96852	0.1935	0.5965	genotyped
rs73718779	2969278	C	B98 Other specified infectious agents as the cause of diseases classified to other chapters	0.00017629	0.25695	0.1042	0.0001314	genotyped
rs757978	242371101	C	B98 Other specified infectious agents as the cause of diseases classified to other chapters	0.00010425	0.49405	0.1079	0.8308	genotyped
rs7944004	2311152	G	B98 Other specified infectious agents as the cause of diseases classified to other chapters	0.00012949	0.17603	0.495364	0.1036	0.972788
rs8024033	40403657	G	B98 Other specified infectious agents as the cause of diseases classified to other chapters	-4.6983e-05	0.62116	0.497166	0.6465	0.986833
rs872071	411064	G	B98 Other specified infectious agents as the cause of diseases classified to other chapters	-3.4794e-05	0.7126	0.4714	0.002756	genotyped
rs898518	109016824	A	B98 Other specified infectious agents as the cause of diseases classified to other chapters	-7.294e-05	0.44738	0.420442	0.6663	0.9953
rs9273012	32611641	G	B98 Other specified infectious agents as the cause of diseases classified to other chapters	0.00015773	0.16225	0.247394	7.827e-08	0.931867
rs9273363	32626272	C	B98 Other specified infectious agents as the cause of diseases classified to other chapters	1.825e-05	0.85961	0.3017	0.008396	genotyped
rs9308731	111908262	A	B98 Other specified infectious agents as the cause of diseases classified to other chapters	-8.3579e-05	0.38026	0.451626	0.8251	0.992825
rs9815073	188115682	A	B98 Other specified infectious agents as the cause of diseases classified to other chapters	2.1708e-05	0.83406	0.343033	0.6382	0.920506
rs9880772	27777779	A	B98 Other specified infectious agents as the cause of diseases classified to other chapters	-3.4923e-05	0.71352	0.45231	0.2082	0.993472
rs10069690	1279790	C	back pain	0.00019388	0.26501	0.2574	0.4474	genotyped
rs10936599	169492101	C	back pain	9.9987e-05	0.57248	0.244	0.1286	genotyped
rs13397985	231091223	T	back pain	0.00013069	0.50237	0.189	0.3714	genotyped
rs13401811	111616104	A	back pain	-0.00015495	0.4295	0.184757	0.4785	0.997125
rs1679013	22206987	T	back pain	-1.5715e-05	0.92178	0.460621	0.6164	0.901667
rs17246404	124462661	T	back pain	0.00014373	0.39534	0.281925	0.07283	0.99983
rs17483466	111797458	A	back pain	-2.8142e-05	0.88179	0.203	0.1932	genotyped
rs210134	33540209	G	back pain	-0.00027493	0.093757	0.3119	0.8643	genotyped
rs2236256	154478440	A	back pain	-0.00015369	0.31554	0.455858	0.1429	0.988131
rs2466024	128188019	A	back pain	-0.00010947	0.4789	0.411781	0.5124	0.995702
rs2511714	103578874	G	back pain	-0.00011297	0.46931	0.402526	0.8305	0.982624
rs305061	85975659	T	back pain	-8.2498e-05	0.60741	0.3395	0.5962	genotyped
rs3769825	202111380	G	back pain	-5.9229e-05	0.70021	0.4289	0.08893	genotyped
rs391525	85944439	A	back pain	7.6927e-05	0.63278	0.3379	0.1393	genotyped
rs4406737	90759724	G	back pain	0.00015757	0.30523	0.4366	0.9501	0.9932
rs4987852	60793921	T	back pain	0.0003156	0.29161	0.06935	0.188	genotyped
rs7169431	56340896	G	back pain	-0.0002223	0.42083	0.0824585	0.4617	1
rs7176508	70018990	G	back pain	3.0586e-05	0.84477	0.385	0.8144	genotyped
rs7231647	57628926	A	back pain	-3.3697e-05	0.8283	0.416174	5.948e-08	0.974209
rs735665	123361397	G	back pain	3.3774e-05	0.86085	0.1935	0.5965	genotyped
rs73718779	2969278	C	back pain	-0.00025431	0.30882	0.1042	0.0001314	genotyped
rs757978	242371101	C	back pain	-0.00065175	0.0077948	0.1079	0.8308	genotyped
rs7944004	2311152	G	back pain	-6.1688e-05	0.68836	0.495364	0.1036	0.972788
rs8024033	40403657	G	back pain	-1.7242e-05	0.91014	0.497166	0.6465	0.986833
rs872071	411064	G	back pain	-0.00017875	0.23891	0.4714	0.002756	genotyped
rs898518	109016824	A	back pain	-0.00013371	0.38619	0.420442	0.6663	0.9953
rs9273012	32611641	G	back pain	0.00011789	0.51564	0.247394	7.827e-08	0.931867
rs9273363	32626272	C	back pain	-7.3819e-05	0.65616	0.3017	0.008396	genotyped
rs9308731	111908262	A	back pain	-0.00012526	0.41316	0.451626	0.8251	0.992825
rs9815073	188115682	A	back pain	0.00032403	0.051715	0.343033	0.6382	0.920506
rs9880772	27777779	A	back pain	6.4649e-05	0.67243	0.45231	0.2082	0.993472
rs10069690	1279790	C	back problem	0.00012076	0.82877	0.2574	0.4474	genotyped
rs10936599	169492101	C	back problem	0.00036154	0.52522	0.244	0.1286	genotyped
rs13397985	231091223	T	back problem	-0.00091838	0.14229	0.189	0.3714	genotyped
rs13401811	111616104	A	back problem	-0.00034401	0.58504	0.184757	0.4785	0.997125
rs1679013	22206987	T	back problem	8.1007e-05	0.87475	0.460621	0.6164	0.901667
rs17246404	124462661	T	back problem	0.00015562	0.7745	0.281925	0.07283	0.99983
rs17483466	111797458	A	back problem	-0.00013961	0.81837	0.203	0.1932	genotyped
rs210134	33540209	G	back problem	-0.0011677	0.026861	0.3119	0.8643	genotyped
rs2236256	154478440	A	back problem	0.00037178	0.45022	0.455858	0.1429	0.988131
rs2466024	128188019	A	back problem	-0.00039478	0.42636	0.411781	0.5124	0.995702
rs2511714	103578874	G	back problem	-0.00096816	0.053398	0.402526	0.8305	0.982624
rs305061	85975659	T	back problem	0.0005298	0.30409	0.3395	0.5962	genotyped
rs3769825	202111380	G	back problem	0.00031898	0.51858	0.4289	0.08893	genotyped
rs391525	85944439	A	back problem	0.00010536	0.83847	0.3379	0.1393	genotyped
rs4406737	90759724	G	back problem	4.5333e-05	0.92686	0.4366	0.9501	0.9932
rs4987852	60793921	T	back problem	0.00049876	0.60358	0.06935	0.188	genotyped
rs7169431	56340896	G	back problem	0.00034683	0.69567	0.0824585	0.4617	1
rs7176508	70018990	G	back problem	8.9849e-05	0.85783	0.385	0.8144	genotyped
rs7231647	57628926	A	back problem	-0.00055117	0.26907	0.416174	5.948e-08	0.974209
rs735665	123361397	G	back problem	-0.0014029	0.023301	0.1935	0.5965	genotyped
rs73718779	2969278	C	back problem	-0.0011391	0.15631	0.1042	0.0001314	genotyped
rs757978	242371101	C	back problem	-0.00024304	0.75741	0.1079	0.8308	genotyped
rs7944004	2311152	G	back problem	-0.00067528	0.17135	0.495364	0.1036	0.972788
rs8024033	40403657	G	back problem	-0.00024795	0.6132	0.497166	0.6465	0.986833
rs872071	411064	G	back problem	-0.00043113	0.37704	0.4714	0.002756	genotyped
rs898518	109016824	A	back problem	1.2706e-05	0.97954	0.420442	0.6663	0.9953
rs9273012	32611641	G	back problem	0.00026357	0.65129	0.247394	7.827e-08	0.931867
rs9273363	32626272	C	back problem	0.00016703	0.75406	0.3017	0.008396	genotyped
rs9308731	111908262	A	back problem	-0.00027817	0.57158	0.451626	0.8251	0.992825
rs9815073	188115682	A	back problem	0.0007225	0.17688	0.343033	0.6382	0.920506
rs9880772	27777779	A	back problem	0.0012297	0.012291	0.45231	0.2082	0.993472
rs10069690	1279790	C	bacterial infection	2.2643e-05	0.92467	0.2574	0.4474	genotyped
rs10936599	169492101	C	bacterial infection	0.0002858	0.24108	0.244	0.1286	genotyped
rs13397985	231091223	T	bacterial infection	-5.5083e-05	0.83724	0.189	0.3714	genotyped
rs13401811	111616104	A	bacterial infection	9.6863e-05	0.71968	0.184757	0.4785	0.997125
rs1679013	22206987	T	bacterial infection	-1.3629e-05	0.95066	0.460621	0.6164	0.901667
rs17246404	124462661	T	bacterial infection	-0.00028979	0.21302	0.281925	0.07283	0.99983
rs17483466	111797458	A	bacterial infection	-0.00011692	0.65349	0.203	0.1932	genotyped
rs210134	33540209	G	bacterial infection	-0.00023338	0.30153	0.3119	0.8643	genotyped
rs2236256	154478440	A	bacterial infection	-0.00011226	0.59444	0.455858	0.1429	0.988131
rs2466024	128188019	A	bacterial infection	-6.296e-05	0.76725	0.411781	0.5124	0.995702
rs2511714	103578874	G	bacterial infection	-1.1898e-05	0.95583	0.402526	0.8305	0.982624
rs305061	85975659	T	bacterial infection	-8.9552e-05	0.68527	0.3395	0.5962	genotyped
rs3769825	202111380	G	bacterial infection	0.00010716	0.6127	0.4289	0.08893	genotyped
rs391525	85944439	A	bacterial infection	-0.00025688	0.24625	0.3379	0.1393	genotyped
rs4406737	90759724	G	bacterial infection	-4.3631e-05	0.83653	0.4366	0.9501	0.9932
rs4987852	60793921	T	bacterial infection	6.2348e-05	0.87967	0.06935	0.188	genotyped
rs7169431	56340896	G	bacterial infection	-0.00011461	0.76299	0.0824585	0.4617	1
rs7176508	70018990	G	bacterial infection	-0.00011787	0.58348	0.385	0.8144	genotyped
rs7231647	57628926	A	bacterial infection	-2.9974e-05	0.88852	0.416174	5.948e-08	0.974209
rs735665	123361397	G	bacterial infection	0.00021741	0.41218	0.1935	0.5965	genotyped
rs73718779	2969278	C	bacterial infection	0.00056896	0.098219	0.1042	0.0001314	genotyped
rs757978	242371101	C	bacterial infection	0.00057924	0.085733	0.1079	0.8308	genotyped
rs7944004	2311152	G	bacterial infection	0.00029154	0.16834	0.495364	0.1036	0.972788
rs8024033	40403657	G	bacterial infection	2.3605e-05	0.9106	0.497166	0.6465	0.986833
rs872071	411064	G	bacterial infection	-5.5703e-05	0.78983	0.4714	0.002756	genotyped
rs898518	109016824	A	bacterial infection	-7.2033e-05	0.7344	0.420442	0.6663	0.9953
rs9273012	32611641	G	bacterial infection	0.00063006	0.011634	0.247394	7.827e-08	0.931867
rs9273363	32626272	C	bacterial infection	-6.7746e-05	0.76667	0.3017	0.008396	genotyped
rs9308731	111908262	A	bacterial infection	-0.00012789	0.54378	0.451626	0.8251	0.992825
rs9815073	188115682	A	bacterial infection	3.8946e-05	0.86507	0.343033	0.6382	0.920506
rs9880772	27777779	A	bacterial infection	0.00014081	0.50337	0.45231	0.2082	0.993472
rs10069690	1279790	C	Basal metabolic rate	-1.4884	0.33738	0.2574	0.4474	genotyped
rs10936599	169492101	C	Basal metabolic rate	3.9436	0.012736	0.244	0.1286	genotyped
rs13397985	231091223	T	Basal metabolic rate	1.6197	0.35485	0.189	0.3714	genotyped
rs13401811	111616104	A	Basal metabolic rate	1.5154	0.38978	0.184757	0.4785	0.997125
rs1679013	22206987	T	Basal metabolic rate	-6.0342	2.1391e-05	0.460621	0.6164	0.901667
rs17246404	124462661	T	Basal metabolic rate	1.7917	0.23382	0.281925	0.07283	0.99983
rs17483466	111797458	A	Basal metabolic rate	2.3825	0.16117	0.203	0.1932	genotyped
rs210134	33540209	G	Basal metabolic rate	3.0946	0.03518	0.3119	0.8643	genotyped
rs2236256	154478440	A	Basal metabolic rate	-1.2101	0.37757	0.455858	0.1429	0.988131
rs2466024	128188019	A	Basal metabolic rate	1.697	0.21654	0.411781	0.5124	0.995702
rs2511714	103578874	G	Basal metabolic rate	0.58492	0.67317	0.402526	0.8305	0.982624
rs305061	85975659	T	Basal metabolic rate	0.8044	0.57281	0.3395	0.5962	genotyped
rs3769825	202111380	G	Basal metabolic rate	-3.2189	0.019856	0.4289	0.08893	genotyped
rs391525	85944439	A	Basal metabolic rate	-1.1852	0.40728	0.3379	0.1393	genotyped
rs4406737	90759724	G	Basal metabolic rate	-0.96363	0.48006	0.4366	0.9501	0.9932
rs4987852	60793921	T	Basal metabolic rate	4.9453	0.061627	0.06935	0.188	genotyped
rs7169431	56340896	G	Basal metabolic rate	1.6994	0.4865	0.0824585	0.4617	1
rs7176508	70018990	G	Basal metabolic rate	-1.2243	0.37544	0.385	0.8144	genotyped
rs7231647	57628926	A	Basal metabolic rate	2.1103	0.12452	0.416174	5.948e-08	0.974209
rs735665	123361397	G	Basal metabolic rate	-0.89955	0.5987	0.1935	0.5965	genotyped
rs73718779	2969278	C	Basal metabolic rate	-3.5023	0.1176	0.1042	0.0001314	genotyped
rs757978	242371101	C	Basal metabolic rate	-11.745	9.444e-08	0.1079	0.8308	genotyped
rs7944004	2311152	G	Basal metabolic rate	2.5	0.066925	0.495364	0.1036	0.972788
rs8024033	40403657	G	Basal metabolic rate	-1.7069	0.20641	0.497166	0.6465	0.986833
rs872071	411064	G	Basal metabolic rate	1.0608	0.43515	0.4714	0.002756	genotyped
rs898518	109016824	A	Basal metabolic rate	-4.0098	0.0034758	0.420442	0.6663	0.9953
rs9273012	32611641	G	Basal metabolic rate	8.7116	8.1549e-08	0.247394	7.827e-08	0.931867
rs9273363	32626272	C	Basal metabolic rate	-9.283	4.061e-10	0.3017	0.008396	genotyped
rs9308731	111908262	A	Basal metabolic rate	4.956	0.00031358	0.451626	0.8251	0.992825
rs9815073	188115682	A	Basal metabolic rate	2.9034	0.051088	0.343033	0.6382	0.920506
rs9880772	27777779	A	Basal metabolic rate	3.6372	0.0077692	0.45231	0.2082	0.993472
rs10069690	1279790	C	Basophill count	-6.9377e-05	0.43884	0.2574	0.4474	genotyped
rs10936599	169492101	C	Basophill count	-1.8631e-05	0.83857	0.244	0.1286	genotyped
rs13397985	231091223	T	Basophill count	-0.00023701	0.018319	0.189	0.3714	genotyped
rs13401811	111616104	A	Basophill count	0.00017019	0.092399	0.184757	0.4785	0.997125
rs1679013	22206987	T	Basophill count	-9.8512e-05	0.23213	0.460621	0.6164	0.901667
rs17246404	124462661	T	Basophill count	1.0479e-05	0.90446	0.281925	0.07283	0.99983
rs17483466	111797458	A	Basophill count	-5.3087e-05	0.58645	0.203	0.1932	genotyped
rs210134	33540209	G	Basophill count	0.00019304	0.022636	0.3119	0.8643	genotyped
rs2236256	154478440	A	Basophill count	-6.9501e-05	0.37928	0.455858	0.1429	0.988131
rs2466024	128188019	A	Basophill count	0.0002831	0.00038882	0.411781	0.5124	0.995702
rs2511714	103578874	G	Basophill count	-0.00018493	0.021743	0.402526	0.8305	0.982624
rs305061	85975659	T	Basophill count	0.00016705	0.043404	0.3395	0.5962	genotyped
rs3769825	202111380	G	Basophill count	0.00013086	0.098982	0.4289	0.08893	genotyped
rs391525	85944439	A	Basophill count	-2.9027e-05	0.7263	0.3379	0.1393	genotyped
rs4406737	90759724	G	Basophill count	6.9537e-05	0.38038	0.4366	0.9501	0.9932
rs4987852	60793921	T	Basophill count	-0.00020079	0.19234	0.06935	0.188	genotyped
rs7169431	56340896	G	Basophill count	-0.00024544	0.084684	0.0824585	0.4617	1
rs7176508	70018990	G	Basophill count	2.5095e-05	0.75532	0.385	0.8144	genotyped
rs7231647	57628926	A	Basophill count	-4.2502e-05	0.59507	0.416174	5.948e-08	0.974209
rs735665	123361397	G	Basophill count	7.2847e-05	0.46333	0.1935	0.5965	genotyped
rs73718779	2969278	C	Basophill count	-0.00015273	0.23641	0.1042	0.0001314	genotyped
rs757978	242371101	C	Basophill count	0.00023136	0.066982	0.1079	0.8308	genotyped
rs7944004	2311152	G	Basophill count	-9.9252e-05	0.21068	0.495364	0.1036	0.972788
rs8024033	40403657	G	Basophill count	5.5524e-05	0.48077	0.497166	0.6465	0.986833
rs872071	411064	G	Basophill count	-1.76e-06	0.98208	0.4714	0.002756	genotyped
rs898518	109016824	A	Basophill count	3.5944e-05	0.65109	0.420442	0.6663	0.9953
rs9273012	32611641	G	Basophill count	-0.00038477	3.9571e-05	0.247394	7.827e-08	0.931867
rs9273363	32626272	C	Basophill count	-1.6968e-05	0.84285	0.3017	0.008396	genotyped
rs9308731	111908262	A	Basophill count	1.5195e-05	0.84734	0.451626	0.8251	0.992825
rs9815073	188115682	A	Basophill count	2.8539e-05	0.73994	0.343033	0.6382	0.920506
rs9880772	27777779	A	Basophill count	0.00039642	5.1037e-07	0.45231	0.2082	0.993472
rs10069690	1279790	C	Basophill percentage	0.0012685	0.20338	0.2574	0.4474	genotyped
rs10936599	169492101	C	Basophill percentage	-0.00059982	0.55567	0.244	0.1286	genotyped
rs13397985	231091223	T	Basophill percentage	-0.0021635	0.052948	0.189	0.3714	genotyped
rs13401811	111616104	A	Basophill percentage	0.0016456	0.14363	0.184757	0.4785	0.997125
rs1679013	22206987	T	Basophill percentage	-0.001101	0.22991	0.460621	0.6164	0.901667
rs17246404	124462661	T	Basophill percentage	-9.0265e-05	0.92595	0.281925	0.07283	0.99983
rs17483466	111797458	A	Basophill percentage	0.00056985	0.59972	0.203	0.1932	genotyped
rs210134	33540209	G	Basophill percentage	0.0020349	0.03078	0.3119	0.8643	genotyped
rs2236256	154478440	A	Basophill percentage	-0.00073452	0.40357	0.455858	0.1429	0.988131
rs2466024	128188019	A	Basophill percentage	0.0024602	0.0056074	0.411781	0.5124	0.995702
rs2511714	103578874	G	Basophill percentage	-0.0021811	0.015027	0.402526	0.8305	0.982624
rs305061	85975659	T	Basophill percentage	0.002154	0.019237	0.3395	0.5962	genotyped
rs3769825	202111380	G	Basophill percentage	0.00010625	0.90418	0.4289	0.08893	genotyped
rs391525	85944439	A	Basophill percentage	-2.1249e-05	0.98162	0.3379	0.1393	genotyped
rs4406737	90759724	G	Basophill percentage	1.629e-06	0.99853	0.4366	0.9501	0.9932
rs4987852	60793921	T	Basophill percentage	-0.0004283	0.80265	0.06935	0.188	genotyped
rs7169431	56340896	G	Basophill percentage	-0.0032082	0.042915	0.0824585	0.4617	1
rs7176508	70018990	G	Basophill percentage	-0.00079384	0.37585	0.385	0.8144	genotyped
rs7231647	57628926	A	Basophill percentage	-0.00092055	0.30086	0.416174	5.948e-08	0.974209
rs735665	123361397	G	Basophill percentage	0.0015	0.17484	0.1935	0.5965	genotyped
rs73718779	2969278	C	Basophill percentage	-0.0011536	0.42148	0.1042	0.0001314	genotyped
rs757978	242371101	C	Basophill percentage	0.0021954	0.11826	0.1079	0.8308	genotyped
rs7944004	2311152	G	Basophill percentage	8.9358e-05	0.91935	0.495364	0.1036	0.972788
rs8024033	40403657	G	Basophill percentage	0.00053257	0.54352	0.497166	0.6465	0.986833
rs872071	411064	G	Basophill percentage	-0.0014736	0.090904	0.4714	0.002756	genotyped
rs898518	109016824	A	Basophill percentage	-0.00037028	0.67556	0.420442	0.6663	0.9953
rs9273012	32611641	G	Basophill percentage	0.00081904	0.43164	0.247394	7.827e-08	0.931867
rs9273363	32626272	C	Basophill percentage	-0.0015419	0.10536	0.3017	0.008396	genotyped
rs9308731	111908262	A	Basophill percentage	-0.00027759	0.75194	0.451626	0.8251	0.992825
rs9815073	188115682	A	Basophill percentage	-6.9512e-05	0.94209	0.343033	0.6382	0.920506
rs9880772	27777779	A	Basophill percentage	0.0036174	3.8279e-05	0.45231	0.2082	0.993472
rs10069690	1279790	C	Beef intake	0.0012765	0.49677	0.2574	0.4474	genotyped
rs10936599	169492101	C	Beef intake	0.00014208	0.94082	0.244	0.1286	genotyped
rs13397985	231091223	T	Beef intake	-0.00027521	0.89612	0.189	0.3714	genotyped
rs13401811	111616104	A	Beef intake	0.0018733	0.37727	0.184757	0.4785	0.997125
rs1679013	22206987	T	Beef intake	0.0035836	0.038089	0.460621	0.6164	0.901667
rs17246404	124462661	T	Beef intake	0.0027961	0.12562	0.281925	0.07283	0.99983
rs17483466	111797458	A	Beef intake	-0.0033103	0.10591	0.203	0.1932	genotyped
rs210134	33540209	G	Beef intake	-0.0027805	0.11641	0.3119	0.8643	genotyped
rs2236256	154478440	A	Beef intake	-0.0016993	0.30395	0.455858	0.1429	0.988131
rs2466024	128188019	A	Beef intake	-0.00046013	0.78275	0.411781	0.5124	0.995702
rs2511714	103578874	G	Beef intake	-0.0020241	0.22969	0.402526	0.8305	0.982624
rs305061	85975659	T	Beef intake	-0.0023456	0.17592	0.3395	0.5962	genotyped
rs3769825	202111380	G	Beef intake	-0.00088093	0.59655	0.4289	0.08893	genotyped
rs391525	85944439	A	Beef intake	0.0020984	0.2272	0.3379	0.1393	genotyped
rs4406737	90759724	G	Beef intake	-0.00039367	0.81247	0.4366	0.9501	0.9932
rs4987852	60793921	T	Beef intake	-0.00052043	0.87191	0.06935	0.188	genotyped
rs7169431	56340896	G	Beef intake	0.0023482	0.43053	0.0824585	0.4617	1
rs7176508	70018990	G	Beef intake	-0.00058652	0.72779	0.385	0.8144	genotyped
rs7231647	57628926	A	Beef intake	0.0025511	0.12793	0.416174	5.948e-08	0.974209
rs735665	123361397	G	Beef intake	0.00046345	0.82365	0.1935	0.5965	genotyped
rs73718779	2969278	C	Beef intake	0.0023139	0.39102	0.1042	0.0001314	genotyped
rs757978	242371101	C	Beef intake	0.0058016	0.028565	0.1079	0.8308	genotyped
rs7944004	2311152	G	Beef intake	0.0015579	0.34802	0.495364	0.1036	0.972788
rs8024033	40403657	G	Beef intake	0.0031983	0.052278	0.497166	0.6465	0.986833
rs872071	411064	G	Beef intake	0.00035384	0.82902	0.4714	0.002756	genotyped
rs898518	109016824	A	Beef intake	6.7498e-06	0.99677	0.420442	0.6663	0.9953
rs9273012	32611641	G	Beef intake	-0.00067312	0.73098	0.247394	7.827e-08	0.931867
rs9273363	32626272	C	Beef intake	-0.0026987	0.1316	0.3017	0.008396	genotyped
rs9308731	111908262	A	Beef intake	0.0017823	0.28178	0.451626	0.8251	0.992825
rs9815073	188115682	A	Beef intake	-0.0020593	0.25242	0.343033	0.6382	0.920506
rs9880772	27777779	A	Beef intake	-0.0020209	0.22117	0.45231	0.2082	0.993472
rs10069690	1279790	C	benign breast lump	-0.00027331	0.24312	0.2574	0.4474	genotyped
rs10936599	169492101	C	benign breast lump	6.0281e-05	0.80037	0.244	0.1286	genotyped
rs13397985	231091223	T	benign breast lump	-0.00028006	0.28446	0.189	0.3714	genotyped
rs13401811	111616104	A	benign breast lump	6.8855e-05	0.79396	0.184757	0.4785	0.997125
rs1679013	22206987	T	benign breast lump	-5.5619e-05	0.79621	0.460621	0.6164	0.901667
rs17246404	124462661	T	benign breast lump	-0.00026506	0.24404	0.281925	0.07283	0.99983
rs17483466	111797458	A	benign breast lump	0.00016998	0.50411	0.203	0.1932	genotyped
rs210134	33540209	G	benign breast lump	9.6859e-05	0.66087	0.3119	0.8643	genotyped
rs2236256	154478440	A	benign breast lump	3.0599e-05	0.88185	0.455858	0.1429	0.988131
rs2466024	128188019	A	benign breast lump	-0.00019485	0.34798	0.411781	0.5124	0.995702
rs2511714	103578874	G	benign breast lump	-6.224e-05	0.76675	0.402526	0.8305	0.982624
rs305061	85975659	T	benign breast lump	0.00023551	0.27555	0.3395	0.5962	genotyped
rs3769825	202111380	G	benign breast lump	1.8592e-05	0.92836	0.4289	0.08893	genotyped
rs391525	85944439	A	benign breast lump	-0.00017648	0.41423	0.3379	0.1393	genotyped
rs4406737	90759724	G	benign breast lump	-7.2648e-05	0.72547	0.4366	0.9501	0.9932
rs4987852	60793921	T	benign breast lump	-0.00046677	0.24461	0.06935	0.188	genotyped
rs7169431	56340896	G	benign breast lump	0.00012816	0.73005	0.0824585	0.4617	1
rs7176508	70018990	G	benign breast lump	-0.00027705	0.18703	0.385	0.8144	genotyped
rs7231647	57628926	A	benign breast lump	0.00024732	0.23644	0.416174	5.948e-08	0.974209
rs735665	123361397	G	benign breast lump	2.6155e-05	0.91958	0.1935	0.5965	genotyped
rs73718779	2969278	C	benign breast lump	0.00041298	0.21843	0.1042	0.0001314	genotyped
rs757978	242371101	C	benign breast lump	0.00013742	0.67678	0.1079	0.8308	genotyped
rs7944004	2311152	G	benign breast lump	-6.8318e-05	0.74104	0.495364	0.1036	0.972788
rs8024033	40403657	G	benign breast lump	0.00015775	0.44308	0.497166	0.6465	0.986833
rs872071	411064	G	benign breast lump	3.6344e-05	0.85853	0.4714	0.002756	genotyped
rs898518	109016824	A	benign breast lump	-0.00012835	0.53616	0.420442	0.6663	0.9953
rs9273012	32611641	G	benign breast lump	-7.1839e-05	0.7682	0.247394	7.827e-08	0.931867
rs9273363	32626272	C	benign breast lump	0.00026207	0.23968	0.3017	0.008396	genotyped
rs9308731	111908262	A	benign breast lump	-0.00013431	0.51388	0.451626	0.8251	0.992825
rs9815073	188115682	A	benign breast lump	-0.0001283	0.56671	0.343033	0.6382	0.920506
rs9880772	27777779	A	benign breast lump	-4.1744e-05	0.83916	0.45231	0.2082	0.993472
rs10069690	1279790	C	bladder problem (not cancer)	0.00015675	0.4979	0.2574	0.4474	genotyped
rs10936599	169492101	C	bladder problem (not cancer)	0.00031434	0.18209	0.244	0.1286	genotyped
rs13397985	231091223	T	bladder problem (not cancer)	-0.00046494	0.07269	0.189	0.3714	genotyped
rs13401811	111616104	A	bladder problem (not cancer)	-0.00028902	0.26769	0.184757	0.4785	0.997125
rs1679013	22206987	T	bladder problem (not cancer)	-2.7249e-05	0.89808	0.460621	0.6164	0.901667
rs17246404	124462661	T	bladder problem (not cancer)	-0.00013446	0.54988	0.281925	0.07283	0.99983
rs17483466	111797458	A	bladder problem (not cancer)	-0.00048543	0.053709	0.203	0.1932	genotyped
rs210134	33540209	G	bladder problem (not cancer)	-6.2471e-05	0.77467	0.3119	0.8643	genotyped
rs2236256	154478440	A	bladder problem (not cancer)	0.00029967	0.14124	0.455858	0.1429	0.988131
rs2466024	128188019	A	bladder problem (not cancer)	0.00010886	0.59636	0.411781	0.5124	0.995702
rs2511714	103578874	G	bladder problem (not cancer)	9.1693e-05	0.65864	0.402526	0.8305	0.982624
rs305061	85975659	T	bladder problem (not cancer)	0.00017027	0.42515	0.3395	0.5962	genotyped
rs3769825	202111380	G	bladder problem (not cancer)	0.00047228	0.020934	0.4289	0.08893	genotyped
rs391525	85944439	A	bladder problem (not cancer)	-1.7958e-05	0.93314	0.3379	0.1393	genotyped
rs4406737	90759724	G	bladder problem (not cancer)	5.1804e-05	0.79984	0.4366	0.9501	0.9932
rs4987852	60793921	T	bladder problem (not cancer)	-0.00015937	0.68872	0.06935	0.188	genotyped
rs7169431	56340896	G	bladder problem (not cancer)	0.00057241	0.11902	0.0824585	0.4617	1
rs7176508	70018990	G	bladder problem (not cancer)	1.1091e-05	0.95742	0.385	0.8144	genotyped
rs7231647	57628926	A	bladder problem (not cancer)	0.00039587	0.055292	0.416174	5.948e-08	0.974209
rs735665	123361397	G	bladder problem (not cancer)	0.00028947	0.25839	0.1935	0.5965	genotyped
rs73718779	2969278	C	bladder problem (not cancer)	0.00068058	0.040607	0.1042	0.0001314	genotyped
rs757978	242371101	C	bladder problem (not cancer)	-9.7348e-05	0.765	0.1079	0.8308	genotyped
rs7944004	2311152	G	bladder problem (not cancer)	-0.00027211	0.18323	0.495364	0.1036	0.972788
rs8024033	40403657	G	bladder problem (not cancer)	-0.00010089	0.6194	0.497166	0.6465	0.986833
rs872071	411064	G	bladder problem (not cancer)	0.00029063	0.15001	0.4714	0.002756	genotyped
rs898518	109016824	A	bladder problem (not cancer)	-0.00014109	0.49138	0.420442	0.6663	0.9953
rs9273012	32611641	G	bladder problem (not cancer)	-0.00023886	0.32211	0.247394	7.827e-08	0.931867
rs9273363	32626272	C	bladder problem (not cancer)	0.0004321	0.050085	0.3017	0.008396	genotyped
rs9308731	111908262	A	bladder problem (not cancer)	-0.00037066	0.06856	0.451626	0.8251	0.992825
rs9815073	188115682	A	bladder problem (not cancer)	7.8891e-05	0.72169	0.343033	0.6382	0.920506
rs9880772	27777779	A	bladder problem (not cancer)	0.00020713	0.30835	0.45231	0.2082	0.993472
rs10069690	1279790	C	blistering/desquamating skin disorder	0.00022245	0.029769	0.2574	0.4474	genotyped
rs10936599	169492101	C	blistering/desquamating skin disorder	-3.0298e-05	0.77129	0.244	0.1286	genotyped
rs13397985	231091223	T	blistering/desquamating skin disorder	-9.2242e-05	0.42116	0.189	0.3714	genotyped
rs13401811	111616104	A	blistering/desquamating skin disorder	-0.00015191	0.18815	0.184757	0.4785	0.997125
rs1679013	22206987	T	blistering/desquamating skin disorder	-0.0001696	0.071721	0.460621	0.6164	0.901667
rs17246404	124462661	T	blistering/desquamating skin disorder	-6.0472e-05	0.54343	0.281925	0.07283	0.99983
rs17483466	111797458	A	blistering/desquamating skin disorder	7.0006e-05	0.52967	0.203	0.1932	genotyped
rs210134	33540209	G	blistering/desquamating skin disorder	-2.6238e-06	0.97833	0.3119	0.8643	genotyped
rs2236256	154478440	A	blistering/desquamating skin disorder	-8.837e-05	0.32698	0.455858	0.1429	0.988131
rs2466024	128188019	A	blistering/desquamating skin disorder	-4.4731e-06	0.96078	0.411781	0.5124	0.995702
rs2511714	103578874	G	blistering/desquamating skin disorder	5.3673e-05	0.55899	0.402526	0.8305	0.982624
rs305061	85975659	T	blistering/desquamating skin disorder	6.3955e-05	0.49856	0.3395	0.5962	genotyped
rs3769825	202111380	G	blistering/desquamating skin disorder	8.0555e-05	0.37358	0.4289	0.08893	genotyped
rs391525	85944439	A	blistering/desquamating skin disorder	-7.5893e-05	0.42314	0.3379	0.1393	genotyped
rs4406737	90759724	G	blistering/desquamating skin disorder	-0.00010109	0.26371	0.4366	0.9501	0.9932
rs4987852	60793921	T	blistering/desquamating skin disorder	0.00032209	0.067402	0.06935	0.188	genotyped
rs7169431	56340896	G	blistering/desquamating skin disorder	0.00024633	0.12963	0.0824585	0.4617	1
rs7176508	70018990	G	blistering/desquamating skin disorder	-5.2171e-05	0.57041	0.385	0.8144	genotyped
rs7231647	57628926	A	blistering/desquamating skin disorder	7.3404e-06	0.93601	0.416174	5.948e-08	0.974209
rs735665	123361397	G	blistering/desquamating skin disorder	-0.00021586	0.056873	0.1935	0.5965	genotyped
rs73718779	2969278	C	blistering/desquamating skin disorder	7.5721e-05	0.60677	0.1042	0.0001314	genotyped
rs757978	242371101	C	blistering/desquamating skin disorder	-0.00030311	0.035498	0.1079	0.8308	genotyped
rs7944004	2311152	G	blistering/desquamating skin disorder	6.375e-05	0.48112	0.495364	0.1036	0.972788
rs8024033	40403657	G	blistering/desquamating skin disorder	-4.9222e-05	0.58408	0.497166	0.6465	0.986833
rs872071	411064	G	blistering/desquamating skin disorder	5.4738e-05	0.54017	0.4714	0.002756	genotyped
rs898518	109016824	A	blistering/desquamating skin disorder	3.8738e-07	0.9966	0.420442	0.6663	0.9953
rs9273012	32611641	G	blistering/desquamating skin disorder	0.00012365	0.24682	0.247394	7.827e-08	0.931867
rs9273363	32626272	C	blistering/desquamating skin disorder	-0.00014194	0.14593	0.3017	0.008396	genotyped
rs9308731	111908262	A	blistering/desquamating skin disorder	-0.00010058	0.26421	0.451626	0.8251	0.992825
rs9815073	188115682	A	blistering/desquamating skin disorder	3.7883e-05	0.69906	0.343033	0.6382	0.920506
rs9880772	27777779	A	blistering/desquamating skin disorder	3.3226e-05	0.71187	0.45231	0.2082	0.993472
rs10069690	1279790	C	Body fat percentage	0.021897	0.075136	0.2574	0.4474	genotyped
rs10936599	169492101	C	Body fat percentage	-0.00069733	0.95572	0.244	0.1286	genotyped
rs13397985	231091223	T	Body fat percentage	0.020345	0.14262	0.189	0.3714	genotyped
rs13401811	111616104	A	Body fat percentage	-0.020844	0.13562	0.184757	0.4785	0.997125
rs1679013	22206987	T	Body fat percentage	-0.034052	0.0025412	0.460621	0.6164	0.901667
rs17246404	124462661	T	Body fat percentage	0.013845	0.24629	0.281925	0.07283	0.99983
rs17483466	111797458	A	Body fat percentage	-0.038071	0.0047355	0.203	0.1932	genotyped
rs210134	33540209	G	Body fat percentage	-0.0095249	0.41246	0.3119	0.8643	genotyped
rs2236256	154478440	A	Body fat percentage	-0.014003	0.19676	0.455858	0.1429	0.988131
rs2466024	128188019	A	Body fat percentage	0.00070176	0.94868	0.411781	0.5124	0.995702
rs2511714	103578874	G	Body fat percentage	-0.0035767	0.74529	0.402526	0.8305	0.982624
rs305061	85975659	T	Body fat percentage	0.0031259	0.78245	0.3395	0.5962	genotyped
rs3769825	202111380	G	Body fat percentage	-0.00023559	0.98284	0.4289	0.08893	genotyped
rs391525	85944439	A	Body fat percentage	-0.0027869	0.80604	0.3379	0.1393	genotyped
rs4406737	90759724	G	Body fat percentage	0.0015476	0.88651	0.4366	0.9501	0.9932
rs4987852	60793921	T	Body fat percentage	-0.019676	0.34952	0.06935	0.188	genotyped
rs7169431	56340896	G	Body fat percentage	-0.0021459	0.91207	0.0824585	0.4617	1
rs7176508	70018990	G	Body fat percentage	0.0034062	0.75667	0.385	0.8144	genotyped
rs7231647	57628926	A	Body fat percentage	-0.0030826	0.77772	0.416174	5.948e-08	0.974209
rs735665	123361397	G	Body fat percentage	0.0068558	0.61396	0.1935	0.5965	genotyped
rs73718779	2969278	C	Body fat percentage	-0.020407	0.24901	0.1042	0.0001314	genotyped
rs757978	242371101	C	Body fat percentage	-0.02467	0.15732	0.1079	0.8308	genotyped
rs7944004	2311152	G	Body fat percentage	0.011967	0.27003	0.495364	0.1036	0.972788
rs8024033	40403657	G	Body fat percentage	-0.013013	0.22611	0.497166	0.6465	0.986833
rs872071	411064	G	Body fat percentage	0.049011	5.1599e-06	0.4714	0.002756	genotyped
rs898518	109016824	A	Body fat percentage	0.020677	0.05787	0.420442	0.6663	0.9953
rs9273012	32611641	G	Body fat percentage	0.018196	0.1567	0.247394	7.827e-08	0.931867
rs9273363	32626272	C	Body fat percentage	-0.041129	0.00046249	0.3017	0.008396	genotyped
rs9308731	111908262	A	Body fat percentage	0.014171	0.19362	0.451626	0.8251	0.992825
rs9815073	188115682	A	Body fat percentage	0.021797	0.064888	0.343033	0.6382	0.920506
rs9880772	27777779	A	Body fat percentage	0.029267	0.0069353	0.45231	0.2082	0.993472
rs10069690	1279790	C	Body mass index (BMI)	-0.0020866	0.82101	0.2574	0.4474	genotyped
rs10069690	1279790	C	Body mass index (BMI)	-0.0017586	0.84763	0.2574	0.4474	genotyped
rs10936599	169492101	C	Body mass index (BMI)	0.0057592	0.54096	0.244	0.1286	genotyped
rs10936599	169492101	C	Body mass index (BMI)	0.0047385	0.61221	0.244	0.1286	genotyped
rs13397985	231091223	T	Body mass index (BMI)	0.012949	0.21382	0.189	0.3714	genotyped
rs13397985	231091223	T	Body mass index (BMI)	0.012686	0.21967	0.189	0.3714	genotyped
rs13401811	111616104	A	Body mass index (BMI)	-0.016114	0.12431	0.184757	0.4785	0.997125
rs13401811	111616104	A	Body mass index (BMI)	-0.01502	0.14881	0.184757	0.4785	0.997125
rs1679013	22206987	T	Body mass index (BMI)	-0.027069	0.0013696	0.460621	0.6164	0.901667
rs1679013	22206987	T	Body mass index (BMI)	-0.025257	0.0026147	0.460621	0.6164	0.901667
rs17246404	124462661	T	Body mass index (BMI)	0.011614	0.19438	0.281925	0.07283	0.99983
rs17246404	124462661	T	Body mass index (BMI)	0.0095316	0.2832	0.281925	0.07283	0.99983
rs17483466	111797458	A	Body mass index (BMI)	-0.0049923	0.61899	0.203	0.1932	genotyped
rs17483466	111797458	A	Body mass index (BMI)	-0.0045677	0.65166	0.203	0.1932	genotyped
rs210134	33540209	G	Body mass index (BMI)	-0.015139	0.082291	0.3119	0.8643	genotyped
rs210134	33540209	G	Body mass index (BMI)	-0.012677	0.14256	0.3119	0.8643	genotyped
rs2236256	154478440	A	Body mass index (BMI)	-0.0073685	0.3649	0.455858	0.1429	0.988131
rs2236256	154478440	A	Body mass index (BMI)	-0.0072711	0.36757	0.455858	0.1429	0.988131
rs2466024	128188019	A	Body mass index (BMI)	-0.0017207	0.83189	0.411781	0.5124	0.995702
rs2466024	128188019	A	Body mass index (BMI)	0.00019147	0.9813	0.411781	0.5124	0.995702
rs2511714	103578874	G	Body mass index (BMI)	0.0069209	0.40146	0.402526	0.8305	0.982624
rs2511714	103578874	G	Body mass index (BMI)	0.0055077	0.50104	0.402526	0.8305	0.982624
rs305061	85975659	T	Body mass index (BMI)	0.0070613	0.40601	0.3395	0.5962	genotyped
rs305061	85975659	T	Body mass index (BMI)	0.0062116	0.46138	0.3395	0.5962	genotyped
rs3769825	202111380	G	Body mass index (BMI)	-0.0095063	0.24401	0.4289	0.08893	genotyped
rs3769825	202111380	G	Body mass index (BMI)	-0.0095012	0.24795	0.4289	0.08893	genotyped
rs391525	85944439	A	Body mass index (BMI)	-0.012522	0.14165	0.3379	0.1393	genotyped
rs391525	85944439	A	Body mass index (BMI)	-0.0094325	0.2646	0.3379	0.1393	genotyped
rs4406737	90759724	G	Body mass index (BMI)	0.0027426	0.73374	0.4366	0.9501	0.9932
rs4406737	90759724	G	Body mass index (BMI)	0.00087447	0.91429	0.4366	0.9501	0.9932
rs4987852	60793921	T	Body mass index (BMI)	-0.0012778	0.93545	0.06935	0.188	genotyped
rs4987852	60793921	T	Body mass index (BMI)	-0.0012283	0.93747	0.06935	0.188	genotyped
rs7169431	56340896	G	Body mass index (BMI)	0.0095846	0.50678	0.0824585	0.4617	1
rs7169431	56340896	G	Body mass index (BMI)	0.0094783	0.51471	0.0824585	0.4617	1
rs7176508	70018990	G	Body mass index (BMI)	0.016004	0.051801	0.385	0.8144	genotyped
rs7176508	70018990	G	Body mass index (BMI)	0.014714	0.071591	0.385	0.8144	genotyped
rs7231647	57628926	A	Body mass index (BMI)	0.0095498	0.24367	0.416174	5.948e-08	0.974209
rs7231647	57628926	A	Body mass index (BMI)	0.007998	0.32516	0.416174	5.948e-08	0.974209
rs735665	123361397	G	Body mass index (BMI)	0.0085041	0.4003	0.1935	0.5965	genotyped
rs735665	123361397	G	Body mass index (BMI)	0.0067703	0.50634	0.1935	0.5965	genotyped
rs73718779	2969278	C	Body mass index (BMI)	-0.017595	0.18151	0.1042	0.0001314	genotyped
rs73718779	2969278	C	Body mass index (BMI)	-0.015408	0.24564	0.1042	0.0001314	genotyped
rs757978	242371101	C	Body mass index (BMI)	-0.033267	0.011072	0.1079	0.8308	genotyped
rs757978	242371101	C	Body mass index (BMI)	-0.031194	0.016358	0.1079	0.8308	genotyped
rs7944004	2311152	G	Body mass index (BMI)	0.01068	0.18577	0.495364	0.1036	0.972788
rs7944004	2311152	G	Body mass index (BMI)	0.010431	0.19962	0.495364	0.1036	0.972788
rs8024033	40403657	G	Body mass index (BMI)	-0.019617	0.014789	0.497166	0.6465	0.986833
rs8024033	40403657	G	Body mass index (BMI)	-0.019114	0.016704	0.497166	0.6465	0.986833
rs872071	411064	G	Body mass index (BMI)	0.023793	0.0029328	0.4714	0.002756	genotyped
rs872071	411064	G	Body mass index (BMI)	0.023529	0.0035118	0.4714	0.002756	genotyped
rs898518	109016824	A	Body mass index (BMI)	0.0081221	0.32017	0.420442	0.6663	0.9953
rs898518	109016824	A	Body mass index (BMI)	0.0070979	0.38135	0.420442	0.6663	0.9953
rs9273012	32611641	G	Body mass index (BMI)	0.036452	0.0001539	0.247394	7.827e-08	0.931867
rs9273012	32611641	G	Body mass index (BMI)	0.035224	0.00022816	0.247394	7.827e-08	0.931867
rs9273363	32626272	C	Body mass index (BMI)	-0.047385	5.8521e-08	0.3017	0.008396	genotyped
rs9273363	32626272	C	Body mass index (BMI)	-0.047671	6.1701e-08	0.3017	0.008396	genotyped
rs9308731	111908262	A	Body mass index (BMI)	0.014909	0.066323	0.451626	0.8251	0.992825
rs9308731	111908262	A	Body mass index (BMI)	0.01394	0.088476	0.451626	0.8251	0.992825
rs9815073	188115682	A	Body mass index (BMI)	0.018077	0.041239	0.343033	0.6382	0.920506
rs9815073	188115682	A	Body mass index (BMI)	0.017063	0.052188	0.343033	0.6382	0.920506
rs9880772	27777779	A	Body mass index (BMI)	0.020219	0.012207	0.45231	0.2082	0.993472
rs9880772	27777779	A	Body mass index (BMI)	0.020074	0.013549	0.45231	0.2082	0.993472
rs10069690	1279790	C	bone disorder	6.1583e-05	0.85953	0.2574	0.4474	genotyped
rs10936599	169492101	C	bone disorder	0.0001648	0.64215	0.244	0.1286	genotyped
rs13397985	231091223	T	bone disorder	-0.00029789	0.44529	0.189	0.3714	genotyped
rs13401811	111616104	A	bone disorder	0.00060598	0.12293	0.184757	0.4785	0.997125
rs1679013	22206987	T	bone disorder	-0.00015651	0.62494	0.460621	0.6164	0.901667
rs17246404	124462661	T	bone disorder	-0.00025611	0.44935	0.281925	0.07283	0.99983
rs17483466	111797458	A	bone disorder	0.00054473	0.15072	0.203	0.1932	genotyped
rs210134	33540209	G	bone disorder	-0.00053606	0.10272	0.3119	0.8643	genotyped
rs2236256	154478440	A	bone disorder	2.5863e-05	0.93278	0.455858	0.1429	0.988131
rs2466024	128188019	A	bone disorder	-4.9347e-05	0.87318	0.411781	0.5124	0.995702
rs2511714	103578874	G	bone disorder	5.0933e-05	0.8704	0.402526	0.8305	0.982624
rs305061	85975659	T	bone disorder	-0.00022648	0.481	0.3395	0.5962	genotyped
rs3769825	202111380	G	bone disorder	-0.00011675	0.70476	0.4289	0.08893	genotyped
rs391525	85944439	A	bone disorder	0.0004656	0.14848	0.3379	0.1393	genotyped
rs4406737	90759724	G	bone disorder	1.3872e-05	0.96401	0.4366	0.9501	0.9932
rs4987852	60793921	T	bone disorder	-0.00015899	0.79057	0.06935	0.188	genotyped
rs7169431	56340896	G	bone disorder	-0.00036775	0.5057	0.0824585	0.4617	1
rs7176508	70018990	G	bone disorder	-0.00037183	0.23419	0.385	0.8144	genotyped
rs7231647	57628926	A	bone disorder	-0.00077979	0.012116	0.416174	5.948e-08	0.974209
rs735665	123361397	G	bone disorder	-0.00029472	0.44448	0.1935	0.5965	genotyped
rs73718779	2969278	C	bone disorder	0.00056512	0.25874	0.1042	0.0001314	genotyped
rs757978	242371101	C	bone disorder	0.00016283	0.73998	0.1079	0.8308	genotyped
rs7944004	2311152	G	bone disorder	4.9669e-05	0.87175	0.495364	0.1036	0.972788
rs8024033	40403657	G	bone disorder	0.00046776	0.12595	0.497166	0.6465	0.986833
rs872071	411064	G	bone disorder	-0.00030881	0.3096	0.4714	0.002756	genotyped
rs898518	109016824	A	bone disorder	0.00057638	0.061835	0.420442	0.6663	0.9953
rs9273012	32611641	G	bone disorder	0.0012149	0.00082162	0.247394	7.827e-08	0.931867
rs9273363	32626272	C	bone disorder	-0.0010276	0.0019682	0.3017	0.008396	genotyped
rs9308731	111908262	A	bone disorder	-0.00015072	0.62301	0.451626	0.8251	0.992825
rs9815073	188115682	A	bone disorder	-2.9374e-05	0.9298	0.343033	0.6382	0.920506
rs9880772	27777779	A	bone disorder	0.00036357	0.23492	0.45231	0.2082	0.993472
rs10069690	1279790	C	bowel problem	0.00040586	0.49104	0.2574	0.4474	genotyped
rs10936599	169492101	C	bowel problem	2.8171e-05	0.96257	0.244	0.1286	genotyped
rs13397985	231091223	T	bowel problem	-0.00076544	0.24661	0.189	0.3714	genotyped
rs13401811	111616104	A	bowel problem	-0.00094704	0.1544	0.184757	0.4785	0.997125
rs1679013	22206987	T	bowel problem	0.00021708	0.68884	0.460621	0.6164	0.901667
rs17246404	124462661	T	bowel problem	0.00065629	0.2521	0.281925	0.07283	0.99983
rs17483466	111797458	A	bowel problem	0.00097103	0.13023	0.203	0.1932	genotyped
rs210134	33540209	G	bowel problem	-0.00053611	0.33535	0.3119	0.8643	genotyped
rs2236256	154478440	A	bowel problem	0.0007914	0.12761	0.455858	0.1429	0.988131
rs2466024	128188019	A	bowel problem	-5.819e-06	0.99114	0.411781	0.5124	0.995702
rs2511714	103578874	G	bowel problem	-0.0002481	0.639	0.402526	0.8305	0.982624
rs305061	85975659	T	bowel problem	-0.00028534	0.59986	0.3395	0.5962	genotyped
rs3769825	202111380	G	bowel problem	-0.00027556	0.59728	0.4289	0.08893	genotyped
rs391525	85944439	A	bowel problem	-0.00017289	0.75122	0.3379	0.1393	genotyped
rs4406737	90759724	G	bowel problem	0.0008689	0.095115	0.4366	0.9501	0.9932
rs4987852	60793921	T	bowel problem	-0.00080816	0.4252	0.06935	0.188	genotyped
rs7169431	56340896	G	bowel problem	-0.00061827	0.50863	0.0824585	0.4617	1
rs7176508	70018990	G	bowel problem	-0.00011186	0.83257	0.385	0.8144	genotyped
rs7231647	57628926	A	bowel problem	0.00022755	0.66541	0.416174	5.948e-08	0.974209
rs735665	123361397	G	bowel problem	0.00052831	0.41814	0.1935	0.5965	genotyped
rs73718779	2969278	C	bowel problem	-1.8237e-06	0.99828	0.1042	0.0001314	genotyped
rs757978	242371101	C	bowel problem	-0.00057477	0.4889	0.1079	0.8308	genotyped
rs7944004	2311152	G	bowel problem	-0.00057532	0.26938	0.495364	0.1036	0.972788
rs8024033	40403657	G	bowel problem	0.00067814	0.19002	0.497166	0.6465	0.986833
rs872071	411064	G	bowel problem	-0.00050706	0.32468	0.4714	0.002756	genotyped
rs898518	109016824	A	bowel problem	-2.2148e-06	0.99662	0.420442	0.6663	0.9953
rs9273012	32611641	G	bowel problem	0.0048386	3.6695e-15	0.247394	7.827e-08	0.931867
rs9273363	32626272	C	bowel problem	-0.0026795	1.8953e-06	0.3017	0.008396	genotyped
rs9308731	111908262	A	bowel problem	-0.00016316	0.75324	0.451626	0.8251	0.992825
rs9815073	188115682	A	bowel problem	-0.0014783	0.0088123	0.343033	0.6382	0.920506
rs9880772	27777779	A	bowel problem	0.0012285	0.017744	0.45231	0.2082	0.993472
rs10069690	1279790	C	Bread intake	0.013132	0.47931	0.2574	0.4474	genotyped
rs10936599	169492101	C	Bread intake	-0.0089776	0.63523	0.244	0.1286	genotyped
rs13397985	231091223	T	Bread intake	-0.001024	0.96082	0.189	0.3714	genotyped
rs13401811	111616104	A	Bread intake	0.022818	0.27676	0.184757	0.4785	0.997125
rs1679013	22206987	T	Bread intake	0.012556	0.46179	0.460621	0.6164	0.901667
rs17246404	124462661	T	Bread intake	-0.01196	0.50742	0.281925	0.07283	0.99983
rs17483466	111797458	A	Bread intake	0.037246	0.065813	0.203	0.1932	genotyped
rs210134	33540209	G	Bread intake	0.033007	0.059468	0.3119	0.8643	genotyped
rs2236256	154478440	A	Bread intake	-0.035503	0.029865	0.455858	0.1429	0.988131
rs2466024	128188019	A	Bread intake	0.017243	0.2954	0.411781	0.5124	0.995702
rs2511714	103578874	G	Bread intake	0.00529	0.75057	0.402526	0.8305	0.982624
rs305061	85975659	T	Bread intake	-0.038096	0.026049	0.3395	0.5962	genotyped
rs3769825	202111380	G	Bread intake	-0.0017478	0.91541	0.4289	0.08893	genotyped
rs391525	85944439	A	Bread intake	-0.01709	0.31937	0.3379	0.1393	genotyped
rs4406737	90759724	G	Bread intake	0.029711	0.069966	0.4366	0.9501	0.9932
rs4987852	60793921	T	Bread intake	0.013922	0.6625	0.06935	0.188	genotyped
rs7169431	56340896	G	Bread intake	0.041969	0.15384	0.0824585	0.4617	1
rs7176508	70018990	G	Bread intake	-0.030049	0.071067	0.385	0.8144	genotyped
rs7231647	57628926	A	Bread intake	-0.0030392	0.85439	0.416174	5.948e-08	0.974209
rs735665	123361397	G	Bread intake	0.022296	0.27789	0.1935	0.5965	genotyped
rs73718779	2969278	C	Bread intake	0.006486	0.8079	0.1042	0.0001314	genotyped
rs757978	242371101	C	Bread intake	-0.031754	0.22557	0.1079	0.8308	genotyped
rs7944004	2311152	G	Bread intake	-0.0091472	0.57708	0.495364	0.1036	0.972788
rs8024033	40403657	G	Bread intake	0.0035963	0.82517	0.497166	0.6465	0.986833
rs872071	411064	G	Bread intake	0.010152	0.53095	0.4714	0.002756	genotyped
rs898518	109016824	A	Bread intake	0.00049648	0.97594	0.420442	0.6663	0.9953
rs9273012	32611641	G	Bread intake	0.011045	0.56835	0.247394	7.827e-08	0.931867
rs9273363	32626272	C	Bread intake	-0.031037	0.079507	0.3017	0.008396	genotyped
rs9308731	111908262	A	Bread intake	-0.019721	0.22844	0.451626	0.8251	0.992825
rs9815073	188115682	A	Bread intake	-0.008031	0.65172	0.343033	0.6382	0.920506
rs9880772	27777779	A	Bread intake	-0.025946	0.11218	0.45231	0.2082	0.993472
rs10069690	1279790	C	breast cysts	-0.0002979	0.27616	0.2574	0.4474	genotyped
rs10936599	169492101	C	breast cysts	0.00038821	0.16293	0.244	0.1286	genotyped
rs13397985	231091223	T	breast cysts	-5.2425e-05	0.86389	0.189	0.3714	genotyped
rs13401811	111616104	A	breast cysts	6.2748e-05	0.83864	0.184757	0.4785	0.997125
rs1679013	22206987	T	breast cysts	-0.00016871	0.50231	0.460621	0.6164	0.901667
rs17246404	124462661	T	breast cysts	5.5487e-05	0.83465	0.281925	0.07283	0.99983
rs17483466	111797458	A	breast cysts	0.00026845	0.3667	0.203	0.1932	genotyped
rs210134	33540209	G	breast cysts	-0.00014951	0.56225	0.3119	0.8643	genotyped
rs2236256	154478440	A	breast cysts	8.9966e-05	0.70845	0.455858	0.1429	0.988131
rs2466024	128188019	A	breast cysts	0.00014459	0.55115	0.411781	0.5124	0.995702
rs2511714	103578874	G	breast cysts	-0.00013315	0.58707	0.402526	0.8305	0.982624
rs305061	85975659	T	breast cysts	7.4476e-05	0.768	0.3395	0.5962	genotyped
rs3769825	202111380	G	breast cysts	-0.00026979	0.26429	0.4289	0.08893	genotyped
rs391525	85944439	A	breast cysts	0.00037913	0.13346	0.3379	0.1393	genotyped
rs4406737	90759724	G	breast cysts	-8.1112e-05	0.73701	0.4366	0.9501	0.9932
rs4987852	60793921	T	breast cysts	-0.00018043	0.70016	0.06935	0.188	genotyped
rs7169431	56340896	G	breast cysts	0.00065219	0.1327	0.0824585	0.4617	1
rs7176508	70018990	G	breast cysts	-0.00028976	0.2374	0.385	0.8144	genotyped
rs7231647	57628926	A	breast cysts	-4.309e-05	0.8598	0.416174	5.948e-08	0.974209
rs735665	123361397	G	breast cysts	1.2483e-05	0.9671	0.1935	0.5965	genotyped
rs73718779	2969278	C	breast cysts	4.2641e-05	0.91341	0.1042	0.0001314	genotyped
rs757978	242371101	C	breast cysts	-0.00047954	0.21327	0.1079	0.8308	genotyped
rs7944004	2311152	G	breast cysts	0.00026583	0.27104	0.495364	0.1036	0.972788
rs8024033	40403657	G	breast cysts	-0.0001001	0.67688	0.497166	0.6465	0.986833
rs872071	411064	G	breast cysts	-5.6515e-05	0.81252	0.4714	0.002756	genotyped
rs898518	109016824	A	breast cysts	0.00039968	0.099174	0.420442	0.6663	0.9953
rs9273012	32611641	G	breast cysts	-0.00027055	0.34218	0.247394	7.827e-08	0.931867
rs9273363	32626272	C	breast cysts	-9.8753e-06	0.96976	0.3017	0.008396	genotyped
rs9308731	111908262	A	breast cysts	0.00029313	0.22285	0.451626	0.8251	0.992825
rs9815073	188115682	A	breast cysts	4.8376e-05	0.85317	0.343033	0.6382	0.920506
rs9880772	27777779	A	breast cysts	0.00012048	0.61572	0.45231	0.2082	0.993472
rs10069690	1279790	C	breast disease (not cancer)	-0.0011142	0.0038189	0.2574	0.4474	genotyped
rs10936599	169492101	C	breast disease (not cancer)	0.00059071	0.13215	0.244	0.1286	genotyped
rs13397985	231091223	T	breast disease (not cancer)	-0.00014927	0.72884	0.189	0.3714	genotyped
rs13401811	111616104	A	breast disease (not cancer)	0.00017971	0.67872	0.184757	0.4785	0.997125
rs1679013	22206987	T	breast disease (not cancer)	-0.00027568	0.43655	0.460621	0.6164	0.901667
rs17246404	124462661	T	breast disease (not cancer)	-0.00036449	0.33063	0.281925	0.07283	0.99983
rs17483466	111797458	A	breast disease (not cancer)	0.00052992	0.20567	0.203	0.1932	genotyped
rs210134	33540209	G	breast disease (not cancer)	-0.00012633	0.72792	0.3119	0.8643	genotyped
rs2236256	154478440	A	breast disease (not cancer)	0.00013633	0.68725	0.455858	0.1429	0.988131
rs2466024	128188019	A	breast disease (not cancer)	-2.5381e-05	0.94078	0.411781	0.5124	0.995702
rs2511714	103578874	G	breast disease (not cancer)	6.0281e-06	0.98607	0.402526	0.8305	0.982624
rs305061	85975659	T	breast disease (not cancer)	0.00046935	0.18693	0.3395	0.5962	genotyped
rs3769825	202111380	G	breast disease (not cancer)	-0.00012291	0.71794	0.4289	0.08893	genotyped
rs391525	85944439	A	breast disease (not cancer)	6.7987e-05	0.84851	0.3379	0.1393	genotyped
rs4406737	90759724	G	breast disease (not cancer)	-0.00010796	0.7511	0.4366	0.9501	0.9932
rs4987852	60793921	T	breast disease (not cancer)	-0.00075509	0.25272	0.06935	0.188	genotyped
rs7169431	56340896	G	breast disease (not cancer)	0.00066088	0.27962	0.0824585	0.4617	1
rs7176508	70018990	G	breast disease (not cancer)	-0.00037185	0.28194	0.385	0.8144	genotyped
rs7231647	57628926	A	breast disease (not cancer)	0.00037203	0.27915	0.416174	5.948e-08	0.974209
rs735665	123361397	G	breast disease (not cancer)	0.0001112	0.79441	0.1935	0.5965	genotyped
rs73718779	2969278	C	breast disease (not cancer)	0.00060882	0.26998	0.1042	0.0001314	genotyped
rs757978	242371101	C	breast disease (not cancer)	-7.5162e-05	0.88981	0.1079	0.8308	genotyped
rs7944004	2311152	G	breast disease (not cancer)	0.00031087	0.36126	0.495364	0.1036	0.972788
rs8024033	40403657	G	breast disease (not cancer)	8.6737e-05	0.79777	0.497166	0.6465	0.986833
rs872071	411064	G	breast disease (not cancer)	-0.00010497	0.7543	0.4714	0.002756	genotyped
rs898518	109016824	A	breast disease (not cancer)	0.00043909	0.19884	0.420442	0.6663	0.9953
rs9273012	32611641	G	breast disease (not cancer)	-0.00013277	0.74052	0.247394	7.827e-08	0.931867
rs9273363	32626272	C	breast disease (not cancer)	0.00018408	0.61559	0.3017	0.008396	genotyped
rs9308731	111908262	A	breast disease (not cancer)	0.0001142	0.7359	0.451626	0.8251	0.992825
rs9815073	188115682	A	breast disease (not cancer)	-8.6682e-05	0.81406	0.343033	0.6382	0.920506
rs9880772	27777779	A	breast disease (not cancer)	-6.4545e-05	0.84876	0.45231	0.2082	0.993472
rs10069690	1279790	C	bronchiectasis	8.9731e-06	0.93813	0.2574	0.4474	genotyped
rs10936599	169492101	C	bronchiectasis	9.0759e-05	0.44074	0.244	0.1286	genotyped
rs13397985	231091223	T	bronchiectasis	-8.0573e-05	0.53401	0.189	0.3714	genotyped
rs13401811	111616104	A	bronchiectasis	1.4196e-05	0.91332	0.184757	0.4785	0.997125
rs1679013	22206987	T	bronchiectasis	-7.7518e-05	0.46617	0.460621	0.6164	0.901667
rs17246404	124462661	T	bronchiectasis	0.00012178	0.27856	0.281925	0.07283	0.99983
rs17483466	111797458	A	bronchiectasis	-0.00026805	0.033173	0.203	0.1932	genotyped
rs210134	33540209	G	bronchiectasis	-1.4749e-05	0.89261	0.3119	0.8643	genotyped
rs2236256	154478440	A	bronchiectasis	-0.000144	0.15795	0.455858	0.1429	0.988131
rs2466024	128188019	A	bronchiectasis	1.138e-05	0.91177	0.411781	0.5124	0.995702
rs2511714	103578874	G	bronchiectasis	0.00010025	0.33371	0.402526	0.8305	0.982624
rs305061	85975659	T	bronchiectasis	-4.1519e-05	0.69731	0.3395	0.5962	genotyped
rs3769825	202111380	G	bronchiectasis	-4.8365e-05	0.63633	0.4289	0.08893	genotyped
rs391525	85944439	A	bronchiectasis	3.0819e-05	0.77338	0.3379	0.1393	genotyped
rs4406737	90759724	G	bronchiectasis	3.9979e-06	0.96878	0.4366	0.9501	0.9932
rs4987852	60793921	T	bronchiectasis	-0.00029585	0.13694	0.06935	0.188	genotyped
rs7169431	56340896	G	bronchiectasis	-7.1734e-05	0.69607	0.0824585	0.4617	1
rs7176508	70018990	G	bronchiectasis	0.00011287	0.27722	0.385	0.8144	genotyped
rs7231647	57628926	A	bronchiectasis	-0.00016166	0.11753	0.416174	5.948e-08	0.974209
rs735665	123361397	G	bronchiectasis	0.00017756	0.16564	0.1935	0.5965	genotyped
rs73718779	2969278	C	bronchiectasis	-9.562e-05	0.56558	0.1042	0.0001314	genotyped
rs757978	242371101	C	bronchiectasis	0.00027009	0.097261	0.1079	0.8308	genotyped
rs7944004	2311152	G	bronchiectasis	-0.00011712	0.25198	0.495364	0.1036	0.972788
rs8024033	40403657	G	bronchiectasis	-0.00010561	0.29854	0.497166	0.6465	0.986833
rs872071	411064	G	bronchiectasis	4.49e-05	0.65689	0.4714	0.002756	genotyped
rs898518	109016824	A	bronchiectasis	-3.4599e-05	0.73578	0.420442	0.6663	0.9953
rs9273012	32611641	G	bronchiectasis	8.9955e-05	0.45639	0.247394	7.827e-08	0.931867
rs9273363	32626272	C	bronchiectasis	0.00015467	0.16128	0.3017	0.008396	genotyped
rs9308731	111908262	A	bronchiectasis	-5.2903e-06	0.95855	0.451626	0.8251	0.992825
rs9815073	188115682	A	bronchiectasis	3.1855e-05	0.77349	0.343033	0.6382	0.920506
rs9880772	27777779	A	bronchiectasis	0.00020382	0.044861	0.45231	0.2082	0.993472
rs10069690	1279790	C	bronchitis	0.00013028	0.52571	0.2574	0.4474	genotyped
rs10936599	169492101	C	bronchitis	0.00026388	0.20688	0.244	0.1286	genotyped
rs13397985	231091223	T	bronchitis	0.00020144	0.38117	0.189	0.3714	genotyped
rs13401811	111616104	A	bronchitis	-4.2917e-05	0.85295	0.184757	0.4785	0.997125
rs1679013	22206987	T	bronchitis	0.00044635	0.018098	0.460621	0.6164	0.901667
rs17246404	124462661	T	bronchitis	-4.0089e-05	0.84073	0.281925	0.07283	0.99983
rs17483466	111797458	A	bronchitis	-0.00013038	0.55954	0.203	0.1932	genotyped
rs210134	33540209	G	bronchitis	8.9096e-05	0.6454	0.3119	0.8643	genotyped
rs2236256	154478440	A	bronchitis	0.0001824	0.31285	0.455858	0.1429	0.988131
rs2466024	128188019	A	bronchitis	-1.7745e-05	0.92247	0.411781	0.5124	0.995702
rs2511714	103578874	G	bronchitis	-5.1803e-05	0.77845	0.402526	0.8305	0.982624
rs305061	85975659	T	bronchitis	-0.00012482	0.50994	0.3395	0.5962	genotyped
rs3769825	202111380	G	bronchitis	-0.00029463	0.10473	0.4289	0.08893	genotyped
rs391525	85944439	A	bronchitis	0.00014247	0.45318	0.3379	0.1393	genotyped
rs4406737	90759724	G	bronchitis	0.00023342	0.19802	0.4366	0.9501	0.9932
rs4987852	60793921	T	bronchitis	-0.00025266	0.47429	0.06935	0.188	genotyped
rs7169431	56340896	G	bronchitis	-0.00027603	0.39689	0.0824585	0.4617	1
rs7176508	70018990	G	bronchitis	1.66e-05	0.92823	0.385	0.8144	genotyped
rs7231647	57628926	A	bronchitis	0.00019001	0.30001	0.416174	5.948e-08	0.974209
rs735665	123361397	G	bronchitis	-0.0001336	0.55664	0.1935	0.5965	genotyped
rs73718779	2969278	C	bronchitis	0.00049668	0.092164	0.1042	0.0001314	genotyped
rs757978	242371101	C	bronchitis	-0.00017424	0.54682	0.1079	0.8308	genotyped
rs7944004	2311152	G	bronchitis	-0.00010369	0.56765	0.495364	0.1036	0.972788
rs8024033	40403657	G	bronchitis	0.00024033	0.18242	0.497166	0.6465	0.986833
rs872071	411064	G	bronchitis	7.3367e-05	0.68212	0.4714	0.002756	genotyped
rs898518	109016824	A	bronchitis	-8.7302e-05	0.63155	0.420442	0.6663	0.9953
rs9273012	32611641	G	bronchitis	-0.00029836	0.16334	0.247394	7.827e-08	0.931867
rs9273363	32626272	C	bronchitis	-1.1989e-05	0.95114	0.3017	0.008396	genotyped
rs9308731	111908262	A	bronchitis	-7.79e-05	0.66642	0.451626	0.8251	0.992825
rs9815073	188115682	A	bronchitis	0.00047916	0.014778	0.343033	0.6382	0.920506
rs9880772	27777779	A	bronchitis	-0.00019631	0.27663	0.45231	0.2082	0.993472
rs10069690	1279790	C	C00-C14 Malignant neoplasms of lip, oral cavity and pharynx	-6.2968e-05	0.5319	0.2574	0.4474	genotyped
rs10936599	169492101	C	C00-C14 Malignant neoplasms of lip, oral cavity and pharynx	0.00014599	0.15464	0.244	0.1286	genotyped
rs13397985	231091223	T	C00-C14 Malignant neoplasms of lip, oral cavity and pharynx	-0.00015237	0.17696	0.189	0.3714	genotyped
rs13401811	111616104	A	C00-C14 Malignant neoplasms of lip, oral cavity and pharynx	0.00014305	0.20792	0.184757	0.4785	0.997125
rs1679013	22206987	T	C00-C14 Malignant neoplasms of lip, oral cavity and pharynx	-0.00016786	0.070118	0.460621	0.6164	0.901667
rs17246404	124462661	T	C00-C14 Malignant neoplasms of lip, oral cavity and pharynx	6.7638e-05	0.48978	0.281925	0.07283	0.99983
rs17483466	111797458	A	C00-C14 Malignant neoplasms of lip, oral cavity and pharynx	6.3488e-05	0.56246	0.203	0.1932	genotyped
rs210134	33540209	G	C00-C14 Malignant neoplasms of lip, oral cavity and pharynx	4.0811e-05	0.66767	0.3119	0.8643	genotyped
rs2236256	154478440	A	C00-C14 Malignant neoplasms of lip, oral cavity and pharynx	-2.1281e-05	0.81044	0.455858	0.1429	0.988131
rs2466024	128188019	A	C00-C14 Malignant neoplasms of lip, oral cavity and pharynx	-7.9358e-05	0.37532	0.411781	0.5124	0.995702
rs2511714	103578874	G	C00-C14 Malignant neoplasms of lip, oral cavity and pharynx	2.3481e-05	0.79504	0.402526	0.8305	0.982624
rs305061	85975659	T	C00-C14 Malignant neoplasms of lip, oral cavity and pharynx	-1.9376e-05	0.83495	0.3395	0.5962	genotyped
rs3769825	202111380	G	C00-C14 Malignant neoplasms of lip, oral cavity and pharynx	2.7285e-05	0.75942	0.4289	0.08893	genotyped
rs391525	85944439	A	C00-C14 Malignant neoplasms of lip, oral cavity and pharynx	-0.00012843	0.16837	0.3379	0.1393	genotyped
rs4406737	90759724	G	C00-C14 Malignant neoplasms of lip, oral cavity and pharynx	-4.7325e-05	0.59488	0.4366	0.9501	0.9932
rs4987852	60793921	T	C00-C14 Malignant neoplasms of lip, oral cavity and pharynx	0.00026819	0.12171	0.06935	0.188	genotyped
rs7169431	56340896	G	C00-C14 Malignant neoplasms of lip, oral cavity and pharynx	-4.9253e-05	0.75813	0.0824585	0.4617	1
rs7176508	70018990	G	C00-C14 Malignant neoplasms of lip, oral cavity and pharynx	-6.9285e-06	0.93896	0.385	0.8144	genotyped
rs7231647	57628926	A	C00-C14 Malignant neoplasms of lip, oral cavity and pharynx	-4.2511e-05	0.63657	0.416174	5.948e-08	0.974209
rs735665	123361397	G	C00-C14 Malignant neoplasms of lip, oral cavity and pharynx	2.1985e-05	0.84375	0.1935	0.5965	genotyped
rs73718779	2969278	C	C00-C14 Malignant neoplasms of lip, oral cavity and pharynx	0.00016715	0.24831	0.1042	0.0001314	genotyped
rs757978	242371101	C	C00-C14 Malignant neoplasms of lip, oral cavity and pharynx	0.00020293	0.15261	0.1079	0.8308	genotyped
rs7944004	2311152	G	C00-C14 Malignant neoplasms of lip, oral cavity and pharynx	-6.3678e-05	0.47453	0.495364	0.1036	0.972788
rs8024033	40403657	G	C00-C14 Malignant neoplasms of lip, oral cavity and pharynx	-0.00023772	0.0072183	0.497166	0.6465	0.986833
rs872071	411064	G	C00-C14 Malignant neoplasms of lip, oral cavity and pharynx	-3.7992e-05	0.66572	0.4714	0.002756	genotyped
rs898518	109016824	A	C00-C14 Malignant neoplasms of lip, oral cavity and pharynx	-8.2153e-05	0.35776	0.420442	0.6663	0.9953
rs9273012	32611641	G	C00-C14 Malignant neoplasms of lip, oral cavity and pharynx	6.576e-05	0.53143	0.247394	7.827e-08	0.931867
rs9273363	32626272	C	C00-C14 Malignant neoplasms of lip, oral cavity and pharynx	-0.00012814	0.18223	0.3017	0.008396	genotyped
rs9308731	111908262	A	C00-C14 Malignant neoplasms of lip, oral cavity and pharynx	4.189e-05	0.63657	0.451626	0.8251	0.992825
rs9815073	188115682	A	C00-C14 Malignant neoplasms of lip, oral cavity and pharynx	-5.3838e-05	0.57664	0.343033	0.6382	0.920506
rs9880772	27777779	A	C00-C14 Malignant neoplasms of lip, oral cavity and pharynx	0.0001261	0.15432	0.45231	0.2082	0.993472
rs10069690	1279790	C	C15-C26 Malignant neoplasms of digestive organs	0.0001548	0.5744	0.2574	0.4474	genotyped
rs10936599	169492101	C	C15-C26 Malignant neoplasms of digestive organs	8.6444e-05	0.75818	0.244	0.1286	genotyped
rs13397985	231091223	T	C15-C26 Malignant neoplasms of digestive organs	-0.00026776	0.38594	0.189	0.3714	genotyped
rs13401811	111616104	A	C15-C26 Malignant neoplasms of digestive organs	-0.00070445	0.023442	0.184757	0.4785	0.997125
rs1679013	22206987	T	C15-C26 Malignant neoplasms of digestive organs	-5.5694e-05	0.82621	0.460621	0.6164	0.901667
rs17246404	124462661	T	C15-C26 Malignant neoplasms of digestive organs	0.00026125	0.32966	0.281925	0.07283	0.99983
rs17483466	111797458	A	C15-C26 Malignant neoplasms of digestive organs	-0.00028104	0.34883	0.203	0.1932	genotyped
rs210134	33540209	G	C15-C26 Malignant neoplasms of digestive organs	9.2149e-05	0.72302	0.3119	0.8643	genotyped
rs2236256	154478440	A	C15-C26 Malignant neoplasms of digestive organs	0.00024113	0.32041	0.455858	0.1429	0.988131
rs2466024	128188019	A	C15-C26 Malignant neoplasms of digestive organs	0.00013252	0.5886	0.411781	0.5124	0.995702
rs2511714	103578874	G	C15-C26 Malignant neoplasms of digestive organs	0.00026191	0.28979	0.402526	0.8305	0.982624
rs305061	85975659	T	C15-C26 Malignant neoplasms of digestive organs	-0.00012625	0.61979	0.3395	0.5962	genotyped
rs3769825	202111380	G	C15-C26 Malignant neoplasms of digestive organs	-6.5487e-05	0.78825	0.4289	0.08893	genotyped
rs391525	85944439	A	C15-C26 Malignant neoplasms of digestive organs	0.00023565	0.35568	0.3379	0.1393	genotyped
rs4406737	90759724	G	C15-C26 Malignant neoplasms of digestive organs	3.6368e-05	0.88132	0.4366	0.9501	0.9932
rs4987852	60793921	T	C15-C26 Malignant neoplasms of digestive organs	-0.00015167	0.74908	0.06935	0.188	genotyped
rs7169431	56340896	G	C15-C26 Malignant neoplasms of digestive organs	0.00032489	0.45792	0.0824585	0.4617	1
rs7176508	70018990	G	C15-C26 Malignant neoplasms of digestive organs	0.0004255	0.085688	0.385	0.8144	genotyped
rs7231647	57628926	A	C15-C26 Malignant neoplasms of digestive organs	-8.0365e-05	0.74411	0.416174	5.948e-08	0.974209
rs735665	123361397	G	C15-C26 Malignant neoplasms of digestive organs	3.1488e-05	0.91784	0.1935	0.5965	genotyped
rs73718779	2969278	C	C15-C26 Malignant neoplasms of digestive organs	-0.0002159	0.58563	0.1042	0.0001314	genotyped
rs757978	242371101	C	C15-C26 Malignant neoplasms of digestive organs	0.00067283	0.083095	0.1079	0.8308	genotyped
rs7944004	2311152	G	C15-C26 Malignant neoplasms of digestive organs	-0.00014419	0.55404	0.495364	0.1036	0.972788
rs8024033	40403657	G	C15-C26 Malignant neoplasms of digestive organs	-0.00030972	0.20085	0.497166	0.6465	0.986833
rs872071	411064	G	C15-C26 Malignant neoplasms of digestive organs	-0.00035412	0.14097	0.4714	0.002756	genotyped
rs898518	109016824	A	C15-C26 Malignant neoplasms of digestive organs	0.00017654	0.4702	0.420442	0.6663	0.9953
rs9273012	32611641	G	C15-C26 Malignant neoplasms of digestive organs	0.00024282	0.39819	0.247394	7.827e-08	0.931867
rs9273363	32626272	C	C15-C26 Malignant neoplasms of digestive organs	-0.00087919	0.00082011	0.3017	0.008396	genotyped
rs9308731	111908262	A	C15-C26 Malignant neoplasms of digestive organs	0.00028929	0.23311	0.451626	0.8251	0.992825
rs9815073	188115682	A	C15-C26 Malignant neoplasms of digestive organs	-0.00015062	0.56828	0.343033	0.6382	0.920506
rs9880772	27777779	A	C15-C26 Malignant neoplasms of digestive organs	-9.1736e-05	0.70503	0.45231	0.2082	0.993472
rs10069690	1279790	C	C18 Malignant neoplasm of colon	-5.0439e-05	0.77951	0.2574	0.4474	genotyped
rs10936599	169492101	C	C18 Malignant neoplasm of colon	0.00034962	0.056678	0.244	0.1286	genotyped
rs13397985	231091223	T	C18 Malignant neoplasm of colon	-0.00023936	0.23584	0.189	0.3714	genotyped
rs13401811	111616104	A	C18 Malignant neoplasm of colon	-0.00029597	0.14533	0.184757	0.4785	0.997125
rs1679013	22206987	T	C18 Malignant neoplasm of colon	7.9133e-05	0.63309	0.460621	0.6164	0.901667
rs17246404	124462661	T	C18 Malignant neoplasm of colon	2.0883e-05	0.90508	0.281925	0.07283	0.99983
rs17483466	111797458	A	C18 Malignant neoplasm of colon	0.0001861	0.34268	0.203	0.1932	genotyped
rs210134	33540209	G	C18 Malignant neoplasm of colon	2.3314e-05	0.89086	0.3119	0.8643	genotyped
rs2236256	154478440	A	C18 Malignant neoplasm of colon	0.00038039	0.016463	0.455858	0.1429	0.988131
rs2466024	128188019	A	C18 Malignant neoplasm of colon	0.00013123	0.41244	0.411781	0.5124	0.995702
rs2511714	103578874	G	C18 Malignant neoplasm of colon	0.00013457	0.40527	0.402526	0.8305	0.982624
rs305061	85975659	T	C18 Malignant neoplasm of colon	-0.00023174	0.16353	0.3395	0.5962	genotyped
rs3769825	202111380	G	C18 Malignant neoplasm of colon	0.00025238	0.11338	0.4289	0.08893	genotyped
rs391525	85944439	A	C18 Malignant neoplasm of colon	6.8036e-05	0.68329	0.3379	0.1393	genotyped
rs4406737	90759724	G	C18 Malignant neoplasm of colon	-0.00010459	0.51116	0.4366	0.9501	0.9932
rs4987852	60793921	T	C18 Malignant neoplasm of colon	-0.00037992	0.22029	0.06935	0.188	genotyped
rs7169431	56340896	G	C18 Malignant neoplasm of colon	0.00029461	0.30314	0.0824585	0.4617	1
rs7176508	70018990	G	C18 Malignant neoplasm of colon	0.00029517	0.068176	0.385	0.8144	genotyped
rs7231647	57628926	A	C18 Malignant neoplasm of colon	0.00011013	0.49376	0.416174	5.948e-08	0.974209
rs735665	123361397	G	C18 Malignant neoplasm of colon	2.3732e-05	0.90532	0.1935	0.5965	genotyped
rs73718779	2969278	C	C18 Malignant neoplasm of colon	-0.00019848	0.44314	0.1042	0.0001314	genotyped
rs757978	242371101	C	C18 Malignant neoplasm of colon	0.00025912	0.30735	0.1079	0.8308	genotyped
rs7944004	2311152	G	C18 Malignant neoplasm of colon	-0.00011875	0.45593	0.495364	0.1036	0.972788
rs8024033	40403657	G	C18 Malignant neoplasm of colon	1.9935e-05	0.89977	0.497166	0.6465	0.986833
rs872071	411064	G	C18 Malignant neoplasm of colon	5.079e-05	0.74662	0.4714	0.002756	genotyped
rs898518	109016824	A	C18 Malignant neoplasm of colon	1.4586e-05	0.92728	0.420442	0.6663	0.9953
rs9273012	32611641	G	C18 Malignant neoplasm of colon	2.1193e-05	0.91016	0.247394	7.827e-08	0.931867
rs9273363	32626272	C	C18 Malignant neoplasm of colon	-0.00043999	0.0104	0.3017	0.008396	genotyped
rs9308731	111908262	A	C18 Malignant neoplasm of colon	-2.2794e-05	0.88574	0.451626	0.8251	0.992825
rs9815073	188115682	A	C18 Malignant neoplasm of colon	0.00020822	0.22733	0.343033	0.6382	0.920506
rs9880772	27777779	A	C18 Malignant neoplasm of colon	-1.1758e-05	0.9408	0.45231	0.2082	0.993472
rs10069690	1279790	C	C20 Malignant neoplasm of rectum	8.1964e-05	0.51439	0.2574	0.4474	genotyped
rs10936599	169492101	C	C20 Malignant neoplasm of rectum	5.1306e-06	0.96804	0.244	0.1286	genotyped
rs13397985	231091223	T	C20 Malignant neoplasm of rectum	7.1279e-05	0.61291	0.189	0.3714	genotyped
rs13401811	111616104	A	C20 Malignant neoplasm of rectum	-0.00022754	0.1086	0.184757	0.4785	0.997125
rs1679013	22206987	T	C20 Malignant neoplasm of rectum	7.8009e-05	0.49994	0.460621	0.6164	0.901667
rs17246404	124462661	T	C20 Malignant neoplasm of rectum	0.00012835	0.29367	0.281925	0.07283	0.99983
rs17483466	111797458	A	C20 Malignant neoplasm of rectum	-2.2879e-05	0.86722	0.203	0.1932	genotyped
rs210134	33540209	G	C20 Malignant neoplasm of rectum	8.994e-05	0.44833	0.3119	0.8643	genotyped
rs2236256	154478440	A	C20 Malignant neoplasm of rectum	-0.00015503	0.16148	0.455858	0.1429	0.988131
rs2466024	128188019	A	C20 Malignant neoplasm of rectum	-9.3396e-05	0.40308	0.411781	0.5124	0.995702
rs2511714	103578874	G	C20 Malignant neoplasm of rectum	5.3279e-05	0.63669	0.402526	0.8305	0.982624
rs305061	85975659	T	C20 Malignant neoplasm of rectum	7.1852e-05	0.53582	0.3395	0.5962	genotyped
rs3769825	202111380	G	C20 Malignant neoplasm of rectum	0.00015714	0.15773	0.4289	0.08893	genotyped
rs391525	85944439	A	C20 Malignant neoplasm of rectum	0.00014878	0.20102	0.3379	0.1393	genotyped
[truncated: 22,120 more rows]

## Sheet: S4 Table
Supplementary Table 4. SNPsnap risk variant associations with 778 UK Biobank GeneATLAS phenotypes
Variant	Position	Eff. Allele	Trait	Beta	p-value	MAF	HWE	imp. score
rs10452132	35917317	C	A00-A09 Intestinal infectious diseases	0.00031539	0.30233	0.438389	0.335	0.990468
rs1056632	26512733	G	A00-A09 Intestinal infectious diseases	0.00026926	0.47632	0.200404	0.05398	0.995072
rs11218607	96714287	C	A00-A09 Intestinal infectious diseases	-5.0757e-05	0.86913	0.400685	0.008508	0.998806
rs114317036	118450099	G	A00-A09 Intestinal infectious diseases	-0.0039837	0.0022409	0.0139	1.488e-27	genotyped
rs114785917	115444914	G	A00-A09 Intestinal infectious diseases	0.0012207	0.40798	0.01063	0.5637	genotyped
rs12150850	342537	T	A00-A09 Intestinal infectious diseases	-0.00016824	0.60912	0.306741	0.7388	0.992863
rs1249007	29032434	A	A00-A09 Intestinal infectious diseases	-0.00033937	0.26403	0.477994	0.6909	0.989931
rs12704723	94148992	A	A00-A09 Intestinal infectious diseases	-0.00034813	0.25031	0.478052	0.684	0.997955
rs12902085	24323171	C	A00-A09 Intestinal infectious diseases	6.1994e-05	0.88319	0.151438	0.3035	0.997239
rs1320521	113677895	A	A00-A09 Intestinal infectious diseases	0.00013566	0.68658	0.287335	0.1124	0.9869
rs13381144	70425411	A	A00-A09 Intestinal infectious diseases	3.3286e-05	0.91746	0.334787	0.9266	0.992994
rs143657807	242231962	A	A00-A09 Intestinal infectious diseases	-0.002378	0.05656	0.0155631	0.8212	0.953153
rs1457716	110979586	G	A00-A09 Intestinal infectious diseases	-0.00010113	0.76089	0.302273	0.8577	0.978283
rs16950400	14691254	A	A00-A09 Intestinal infectious diseases	-0.00084691	0.025749	0.203732	0.05996	0.97053
rs1737328	163806299	A	A00-A09 Intestinal infectious diseases	-0.00025947	0.4232	0.323849	0.03903	0.989489
rs176961	78185428	C	A00-A09 Intestinal infectious diseases	-0.00070012	0.02064	0.485699	0.6496	0.999837
rs186351296	29982667	A	A00-A09 Intestinal infectious diseases	0.00082625	0.58945	0.009899	0.3544	genotyped
rs2052029	234927688	G	A00-A09 Intestinal infectious diseases	0.00076516	0.01756	0.327169	0.0003725	0.992803
rs2155948	29096919	T	A00-A09 Intestinal infectious diseases	0.00025987	0.41617	0.356092	0.8544	0.972088
rs2240110	19122498	T	A00-A09 Intestinal infectious diseases	-0.00034049	0.26381	0.497885	0.5493	0.984859
rs2248180	75460501	C	A00-A09 Intestinal infectious diseases	0.00040159	0.19952	0.386083	0.7563	0.984532
rs232588	38420673	C	A00-A09 Intestinal infectious diseases	9.1422e-06	0.97606	0.478381	0.008831	0.979478
[truncated: 37,322 more rows]

## Sheet: S5 Table
Supplementary Table 5. Proportion of variants in each SNP-set associated with UK Biobank PheWAS trait
[truncated: 757 more rows]

[truncated: 3 more sheets: S6 Table, S7 Table, S8 Table]
